# Supplementary material for: DFT rationalization of the mechanism and selectivity in a gold-catalyzed oxidative cyclization of diynones with alcohols
Source: Royal Society of Chemistry journal article supplement (doi:10.1039/d4cp01700e), 2024-01-01
Supplement: d4cp01700e1.pdf [file d4cp01700e1.pdf]

## Electronic Supplementary Information

### DFT rationalization of mechanism and selectivity in gold-catalyzed oxidative cyclization of diynones with alcohols

*Guowei Yan<sup>a</sup>, Ji Ma<sup>a</sup>, Simeng Qi<sup>a</sup>, Alexander M. Kirillov<sup>b</sup>, Lizi Yang<sup>c\*</sup> and Ran Fang<sup>a\*</sup>*

<sup>a</sup> Key Laboratory of Chemical Additives for China National Light Industry, College of Chemistry and Chemical Engineering, Shaanxi University of Science and Technology, Xi'an 710021, P. R. China. [fangr@lzu.edu.cn](mailto:fangr@lzu.edu.cn).

<sup>b</sup> MINDlab: Molecular Design & Innovation Laboratory, Centro de Química Estrutural Institute of Molecular Sciences, Departamento de Engenharia Química, Instituto Superior Técnico, Universidade de Lisboa, Av. Rovisco Pais, 1049-001, Lisbon, Portugal.

<sup>c</sup> College of Chemistry and Chemical Engineering, Lanzhou University, Lanzhou 730000, P. R. China

\*Corresponding author.

E-mail address:

[fangr@lzu.edu.cn](mailto:fangr@lzu.edu.cn) (R. Fang).

[yanglz@lzu.edu.cn](mailto:yanglz@lzu.edu.cn)

(L.

Yang)

## Table of contents

|                                                                                                        |    |
|--------------------------------------------------------------------------------------------------------|----|
| Figure S1. Different conformers and configurations of the transition states for Re2 attacking Re1..... | S1 |
| Figure S2. Different conformers and configurations of the transition states for Re3 attacking Re1..... | S2 |
| Figure S3. C <sup>1</sup> -O key scan results for intermediate 1-INT3.....                             | S2 |
| Figure S4. Direct proton migration.....                                                                | S3 |
| Figure S5. Full energy profile calculated for Re1(additions) .....                                     | S3 |
| Cartesian coordinates of the stationary points .....                                                   | S4 |

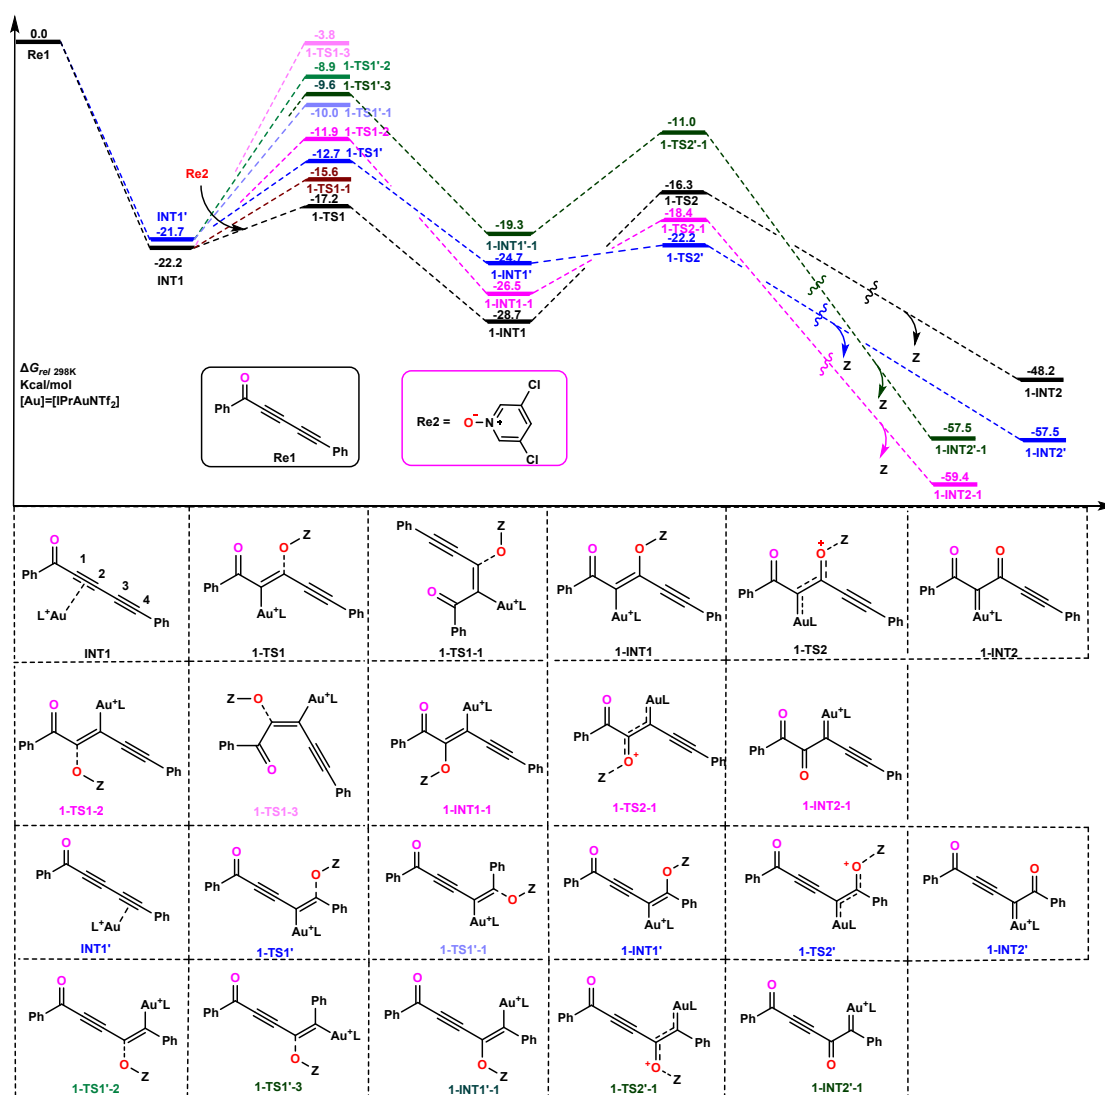

**Figure S1.** Different conformers and configurations of the transition states for **Re2** attacking **Re1**. Energies are in kcal/mol.

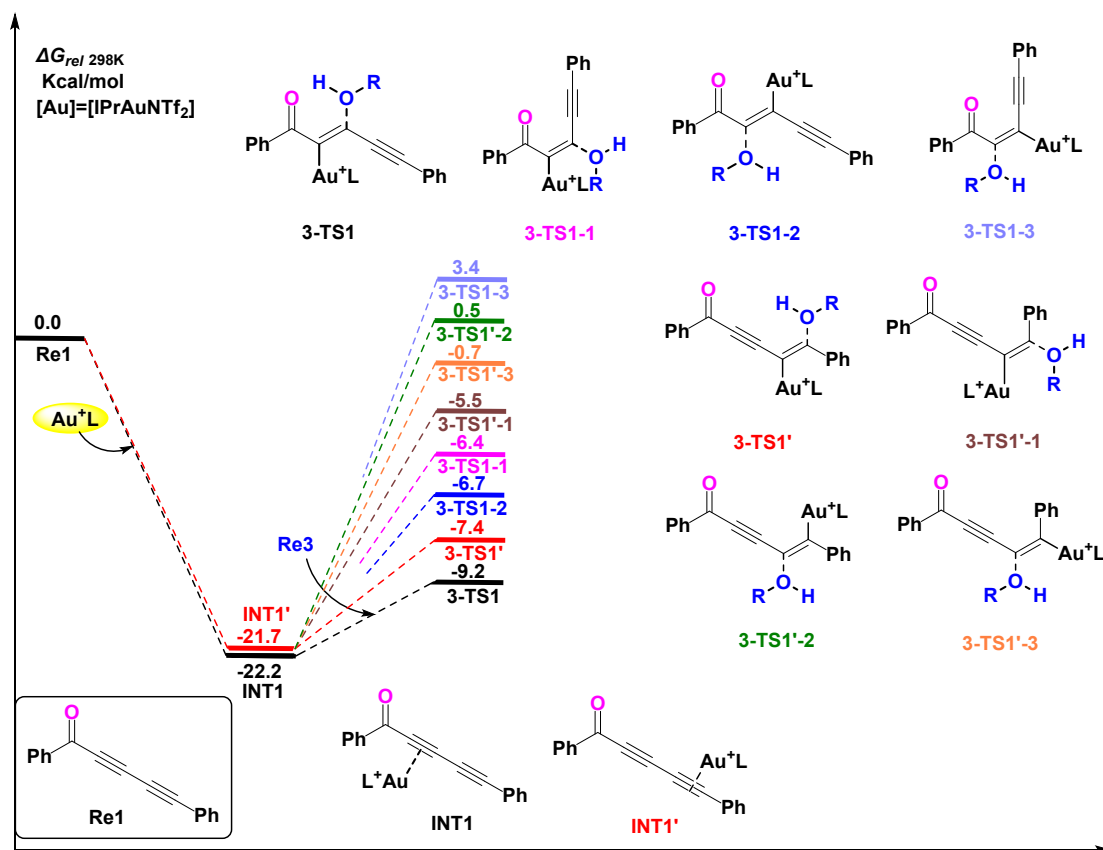

**Figure S2.** Different conformers and configurations of the transition states for **Re3** attacking **Re1**. Energies are in kcal/mol.

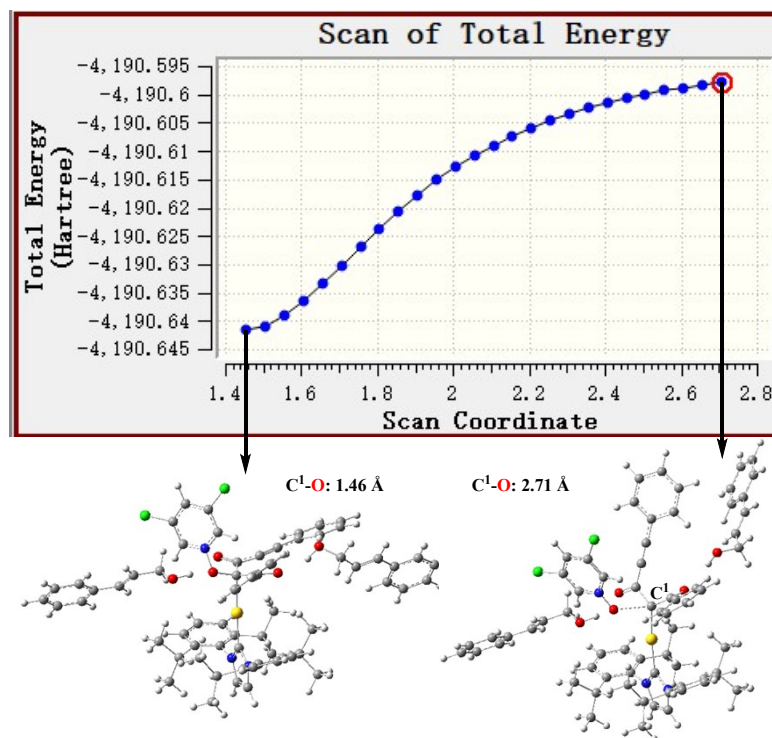

**Figure S3.**  $C^1-O$  key scan results for intermediate **1-INT3**.

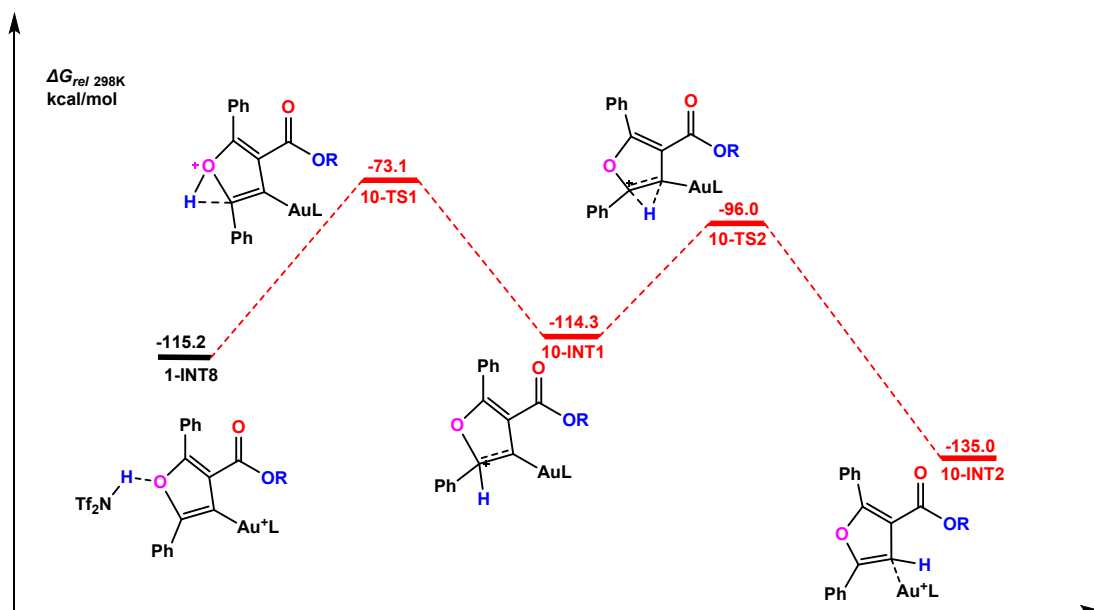

**Figure S4.** Direct proton migration. Relative energies are expressed in kcal/mol.

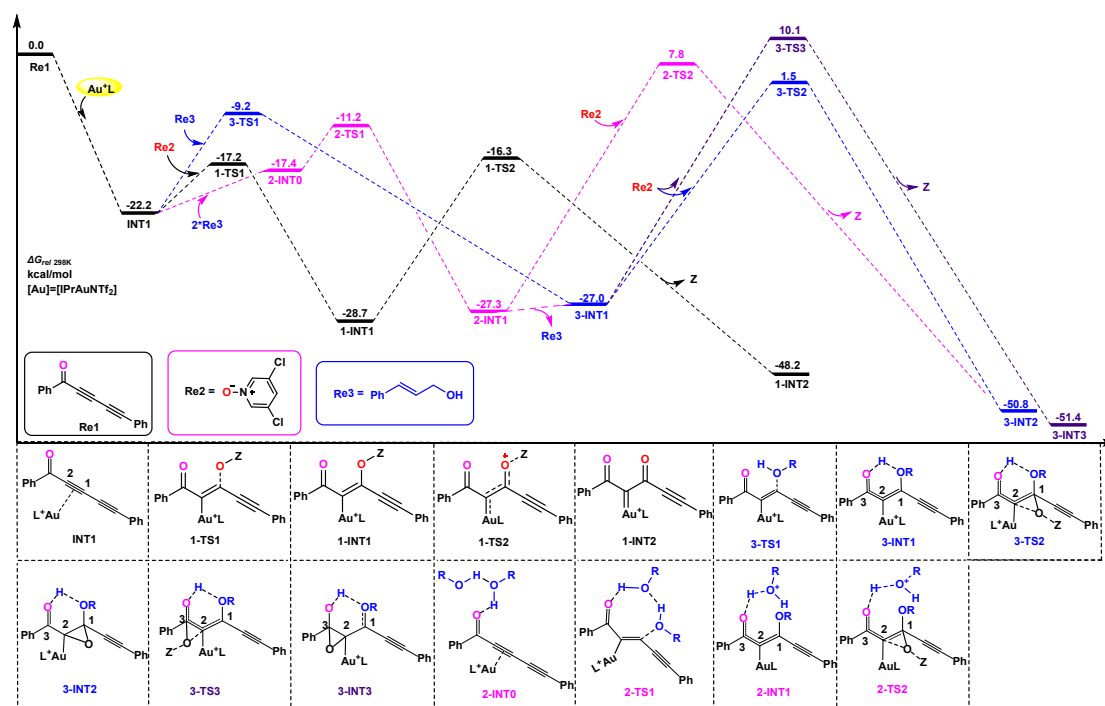

**Figure S5.** Full energy profile calculated for **Re1** (additions). Relative energies are expressed in kcal/mol.

## Cartesian coordinates of the stationary points

Re1

|   |             |             |             |
|---|-------------|-------------|-------------|
| C | 2.88242426  | -1.41476115 | -0.00005942 |
| O | 3.10283726  | -2.62434715 | 0.00010058  |
| C | 4.01115526  | -0.43299615 | -0.00008242 |
| C | 5.31835126  | -0.95202215 | -0.00046742 |
| C | 3.87354026  | 0.96145785  | 0.00031458  |
| C | 6.42841726  | -0.11757015 | -0.00046542 |
| H | 5.42052826  | -2.03168815 | -0.00075942 |
| C | 4.97126926  | 1.81535785  | 0.00037158  |
| C | 6.25308126  | 1.27062885  | -0.00002942 |
| H | 7.42733226  | -0.54137815 | -0.00078342 |
| H | 4.80101526  | 2.88623385  | 0.00072658  |
| C | 1.48348476  | -0.93505974 | -0.00029197 |
| C | 0.28881276  | -0.67957374 | -0.00015497 |
| C | -1.15621422 | -0.34302850 | -0.00012435 |
| C | -2.34693222 | -0.06641050 | -0.00005435 |
| C | -3.79748900 | 0.26797700  | -0.00002500 |
| C | -4.77334600 | -0.76361500 | 0.00020200  |
| C | -4.19702400 | 1.62004300  | -0.00034100 |
| C | -6.11981000 | -0.39302300 | 0.00014100  |
| C | -5.54525000 | 1.95795500  | -0.00042700 |
| H | -3.43350000 | 2.39091300  | -0.00050800 |
| C | -6.50869400 | 0.94777300  | -0.00018000 |
| H | -6.87800400 | -1.17127300 | 0.00032900  |
| H | -5.84309100 | 3.00178400  | -0.00068900 |
| H | -7.56451600 | 1.20208800  | -0.00025000 |
| H | 7.11483826  | 1.93117785  | 0.00000058  |
| H | 2.90105604  | 1.40774734  | 0.00067544  |
| H | -4.48207474 | -1.79320765 | 0.00038236  |

|                                              |                             |
|----------------------------------------------|-----------------------------|
| Zero-point correction=                       | 0.212084 (Hartree/Particle) |
| Thermal correction to Energy=                | 0.226893                    |
| Thermal correction to Enthalpy=              | 0.227837                    |
| Thermal correction to Gibbs Free Energy=     | 0.166334                    |
| Sum of electronic and zero-point Energies=   | -728.745923                 |
| Sum of electronic and thermal Energies=      | -728.731114                 |
| Sum of electronic and thermal Enthalpies=    | -728.730170                 |
| Sum of electronic and thermal Free Energies= | -728.791673                 |

Re2

|                                              |             |             |                             |
|----------------------------------------------|-------------|-------------|-----------------------------|
| C                                            | 1.18532000  | 1.04715300  | -0.00021100                 |
| C                                            | 1.18346800  | -0.33641600 | -0.00015600                 |
| C                                            | 0.00003900  | -1.07403100 | 0.00003500                  |
| C                                            | -1.18336900 | -0.33657700 | 0.00017600                  |
| C                                            | -1.18535600 | 1.04708900  | 0.00012900                  |
| H                                            | 0.00018700  | -2.15521000 | 0.00008100                  |
| H                                            | 2.07132700  | 1.66426300  | -0.00036000                 |
| H                                            | -2.07157100 | 1.66390800  | 0.00023900                  |
| Cl                                           | -2.72185900 | -1.16370300 | 0.00043400                  |
| Cl                                           | 2.72193400  | -1.16359600 | -0.00035300                 |
| N                                            | -0.00013300 | 1.74368800  | -0.00006700                 |
| O                                            | -0.00011200 | 3.01275000  | -0.00008700                 |
| Zero-point correction=                       |             |             | 0.073627 (Hartree/Particle) |
| Thermal correction to Energy=                |             |             | 0.081071                    |
| Thermal correction to Enthalpy=              |             |             | 0.082015                    |
| Thermal correction to Gibbs Free Energy=     |             |             | 0.040487                    |
| Sum of electronic and zero-point Energies=   |             |             | -1242.560937                |
| Sum of electronic and thermal Energies=      |             |             | -1242.553493                |
| Sum of electronic and thermal Enthalpies=    |             |             | -1242.552549                |
| Sum of electronic and thermal Free Energies= |             |             | -1242.594077                |

Re3

|                        |             |             |                             |
|------------------------|-------------|-------------|-----------------------------|
| C                      | -0.84344000 | -0.58676900 | -0.20941100                 |
| C                      | -1.89086300 | 0.24754200  | -0.29389800                 |
| H                      | -1.04927500 | -1.65812600 | -0.22463000                 |
| H                      | -1.75381400 | 1.32739500  | -0.26704100                 |
| C                      | 0.58094400  | -0.23984100 | -0.09601400                 |
| C                      | 1.52089100  | -1.27483800 | 0.04999600                  |
| C                      | 1.05725900  | 1.08430900  | -0.12501700                 |
| C                      | 2.88286800  | -1.00342200 | 0.16889200                  |
| H                      | 1.17304900  | -2.30467300 | 0.07158700                  |
| C                      | 2.41632600  | 1.35663800  | -0.00521700                 |
| H                      | 0.35978000  | 1.90715800  | -0.24672600                 |
| C                      | 3.33700300  | 0.31501900  | 0.14292700                  |
| H                      | 3.58820300  | -1.82173600 | 0.28132700                  |
| H                      | 2.76146100  | 2.38631000  | -0.03054800                 |
| H                      | 4.39718900  | 0.53146200  | 0.23436600                  |
| C                      | -3.31563000 | -0.21135100 | -0.40208200                 |
| H                      | -3.35749200 | -1.31197300 | -0.42602500                 |
| H                      | -3.76700800 | 0.15061500  | -1.33378800                 |
| O                      | -4.13684400 | 0.32490500  | 0.63569000                  |
| H                      | -3.72948600 | 0.07060000  | 1.47490100                  |
| Zero-point correction= |             |             | 0.167017 (Hartree/Particle) |

|                                              |             |
|----------------------------------------------|-------------|
| Thermal correction to Energy=                | 0.176294    |
| Thermal correction to Enthalpy=              | 0.177238    |
| Thermal correction to Gibbs Free Energy=     | 0.131392    |
| Sum of electronic and zero-point Energies=   | -424.023905 |
| Sum of electronic and thermal Energies=      | -424.014628 |
| Sum of electronic and thermal Enthalpies=    | -424.013684 |
| Sum of electronic and thermal Free Energies= | -424.059531 |

## Z

|                                              |             |             |                             |
|----------------------------------------------|-------------|-------------|-----------------------------|
| C                                            | 1.14896200  | 1.38661000  | 0.00056900                  |
| C                                            | 1.18767300  | -0.00990500 | 0.00041100                  |
| C                                            | -0.00001000 | -0.73666800 | 0.00013200                  |
| C                                            | -1.18778600 | -0.00961800 | -0.00021100                 |
| C                                            | -1.14903000 | 1.38662200  | -0.00046900                 |
| H                                            | -0.00025700 | -1.81994200 | 0.00012400                  |
| H                                            | 2.07090200  | 1.96147700  | 0.00028400                  |
| H                                            | -2.07071700 | 1.96186700  | -0.00059900                 |
| Cl                                           | -2.72660400 | -0.84328200 | 0.00008800                  |
| Cl                                           | 2.72662000  | -0.84326400 | -0.00020100                 |
| N                                            | 0.00013600  | 2.06651900  | -0.00006900                 |
| Zero-point correction=                       |             |             | 0.069636 (Hartree/Particle) |
| Thermal correction to Energy=                |             |             | 0.076196                    |
| Thermal correction to Enthalpy=              |             |             | 0.077140                    |
| Thermal correction to Gibbs Free Energy=     |             |             | 0.037651                    |
| Sum of electronic and zero-point Energies=   |             |             | -1167.407808                |
| Sum of electronic and thermal Energies=      |             |             | -1167.401248                |
| Sum of electronic and thermal Enthalpies=    |             |             | -1167.400304                |
| Sum of electronic and thermal Free Energies= |             |             | -1167.439793                |

## NTf<sub>2</sub><sup>-</sup>

|   |             |             |             |
|---|-------------|-------------|-------------|
| S | 1.30418300  | -0.88778000 | -0.24023900 |
| S | -1.51040900 | -0.86896600 | 0.31234500  |
| O | 1.02739500  | -0.76681700 | -1.67846000 |
| O | 2.27537700  | -1.89240300 | 0.21150800  |
| O | -2.32107900 | -1.06049200 | 1.52017000  |
| O | -1.81679800 | -1.65794000 | -0.88687400 |
| C | 2.11755800  | 0.73655400  | 0.20701900  |
| C | -1.90661600 | 0.89422200  | -0.18550800 |
| F | 3.24097400  | 0.88821700  | -0.51893600 |
| F | 2.45209900  | 0.78395000  | 1.50407500  |
| F | 1.30853200  | 1.77422100  | -0.05922700 |
| F | -1.60555700 | 1.75088700  | 0.80349500  |



|                                              |             |             |                             |
|----------------------------------------------|-------------|-------------|-----------------------------|
| F                                            | -3.22301100 | 1.00594700  | -0.44478600                 |
| F                                            | -1.23376700 | 1.26503000  | -1.28250600                 |
| N                                            | 0.03733900  | -0.83853800 | 0.76678000                  |
| Zero-point correction=                       |             |             | 0.053449 (Hartree/Particle) |
| Thermal correction to Energy=                |             |             | 0.067858                    |
| Thermal correction to Enthalpy=              |             |             | 0.068802                    |
| Thermal correction to Gibbs Free Energy=     |             |             | 0.010132                    |
| Sum of electronic and zero-point Energies=   |             |             | -1827.150632                |
| Sum of electronic and thermal Energies=      |             |             | -1827.136224                |
| Sum of electronic and thermal Enthalpies=    |             |             | -1827.135279                |
| Sum of electronic and thermal Free Energies= |             |             | -1827.193949                |

#### Au<sup>+</sup>L

|    |             |             |             |
|----|-------------|-------------|-------------|
| Au | -0.00009300 | -0.00218500 | -1.68981400 |
| C  | 0.00001800  | 0.00021000  | 0.28785300  |
| C  | 0.68019200  | 0.00276400  | 2.41295000  |
| C  | -0.68010400 | 0.00256000  | 2.41297100  |
| H  | -1.39236100 | 0.00334800  | 3.22242800  |
| H  | 1.39247500  | 0.00372100  | 3.22238500  |
| N  | 1.08957200  | 0.00124400  | 1.08721600  |
| N  | -1.08951700 | 0.00104100  | 1.08724700  |
| C  | 2.47528900  | 0.00096700  | 0.64667200  |
| C  | 3.11408600  | -1.24105600 | 0.45693700  |
| C  | 3.11389100  | 1.24280200  | 0.45492100  |
| C  | 4.45114500  | -1.20707100 | 0.04249900  |
| C  | 4.45097200  | 1.20836600  | 0.04061100  |
| C  | 5.11211100  | 0.00053100  | -0.16533400 |
| H  | 4.98175300  | -2.14050700 | -0.11502800 |
| H  | 4.98145800  | 2.14163100  | -0.11834300 |
| H  | 6.14979300  | 0.00035900  | -0.48462800 |
| C  | -2.47524100 | 0.00062000  | 0.64673100  |
| C  | -3.11416500 | 1.24237400  | 0.45553900  |
| C  | -3.11370100 | -1.24148800 | 0.45642300  |
| C  | -4.45124100 | 1.20776300  | 0.04121700  |
| C  | -4.45076300 | -1.20767700 | 0.04199300  |
| C  | -5.11205200 | -0.00015300 | -0.16528600 |
| H  | -4.98198000 | 2.14095300  | -0.11733000 |
| H  | -4.98112300 | -2.14118200 | -0.11595900 |
| H  | -6.14973300 | -0.00045400 | -0.48458200 |
| C  | -2.42741000 | 2.58520700  | 0.68839300  |
| C  | -3.09519900 | 3.36160100  | 1.84131100  |
| C  | -2.38592700 | 3.43243800  | -0.59840000 |
| H  | -1.39018400 | 2.39680200  | 0.98442300  |

|                                              |             |             |                             |
|----------------------------------------------|-------------|-------------|-----------------------------|
| H                                            | -3.09624900 | 2.78190800  | 2.76971500                  |
| H                                            | -2.56188100 | 4.29911800  | 2.02695100                  |
| H                                            | -4.13415800 | 3.61166800  | 1.60525600                  |
| H                                            | -1.88320700 | 2.90039000  | -1.41346900                 |
| H                                            | -3.39177300 | 3.69246800  | -0.94237900                 |
| H                                            | -1.84628500 | 4.36751900  | -0.41893000                 |
| C                                            | -2.42642300 | -2.58389900 | 0.69016700                  |
| C                                            | -2.38275100 | -3.43087600 | -0.59671700                 |
| C                                            | -3.09517900 | -3.36083600 | 1.84213600                  |
| H                                            | -1.38970900 | -2.39483000 | 0.98757900                  |
| H                                            | -1.87893300 | -2.89846900 | -1.41088100                 |
| H                                            | -1.84311700 | -4.36585800 | -0.41667700                 |
| H                                            | -3.38801400 | -3.69105200 | -0.94228900                 |
| H                                            | -3.09789500 | -2.78115800 | 2.77054100                  |
| H                                            | -4.13362300 | -3.61173000 | 1.60469900                  |
| H                                            | -2.56139400 | -4.29795100 | 2.02844500                  |
| C                                            | 2.42680200  | 2.58555800  | 0.68723100                  |
| C                                            | 2.38533500  | 3.43236700  | -0.59983500                 |
| C                                            | 3.09424700  | 3.36245800  | 1.84000300                  |
| H                                            | 1.38956900  | 2.39701900  | 0.98315700                  |
| H                                            | 1.88283600  | 2.89995300  | -1.41480200                 |
| H                                            | 1.84548000  | 4.36739800  | -0.42074200                 |
| H                                            | 3.39117500  | 3.69248700  | -0.94376500                 |
| H                                            | 3.09520100  | 2.78308900  | 2.76860800                  |
| H                                            | 4.13321300  | 3.61260100  | 1.60405900                  |
| H                                            | 2.56075200  | 4.29996100  | 2.02520800                  |
| C                                            | 2.42716900  | -2.58356600 | 0.69120800                  |
| C                                            | 3.09632100  | -3.36003500 | 1.84326800                  |
| C                                            | 2.38348500  | -3.43092700 | -0.59541900                 |
| H                                            | 1.39047300  | -2.39465900 | 0.98878700                  |
| H                                            | 3.09914100  | -2.78007800 | 2.77149700                  |
| H                                            | 2.56273000  | -4.29718300 | 2.02997400                  |
| H                                            | 4.13475400  | -3.61083600 | 1.60568700                  |
| H                                            | 1.87941100  | -2.89889500 | -1.40967100                 |
| H                                            | 3.38876800  | -3.69093100 | -0.94106400                 |
| H                                            | 1.84412000  | -4.36599300 | -0.41502400                 |
| Zero-point correction=                       |             |             | 0.572657 (Hartree/Particle) |
| Thermal correction to Energy=                |             |             | 0.605223                    |
| Thermal correction to Enthalpy=              |             |             | 0.606167                    |
| Thermal correction to Gibbs Free Energy=     |             |             | 0.504559                    |
| Sum of electronic and zero-point Energies=   |             |             | -1294.803490                |
| Sum of electronic and thermal Energies=      |             |             | -1294.770924                |
| Sum of electronic and thermal Enthalpies=    |             |             | -1294.769980                |
| Sum of electronic and thermal Free Energies= |             |             | -1294.871588                |

## INT1

|    |             |             |             |
|----|-------------|-------------|-------------|
| C  | 0.44612800  | -2.45346100 | -2.34026400 |
| O  | 0.15936700  | -1.96631100 | -3.41609600 |
| C  | 0.17363900  | -3.85830300 | -1.95779700 |
| C  | -0.41106200 | -4.69765300 | -2.92272500 |
| C  | 0.48085700  | -4.36301100 | -0.68478200 |
| C  | -0.68022900 | -6.02623500 | -2.61361000 |
| H  | -0.63993900 | -4.28862500 | -3.90090000 |
| C  | 0.20629700  | -5.69449200 | -0.38013200 |
| C  | -0.37179600 | -6.52535600 | -1.34328800 |
| H  | -1.12883900 | -6.67556800 | -3.35884100 |
| H  | 0.44398100  | -6.08504200 | 0.60434100  |
| C  | 1.13146700  | -1.56883200 | -1.31637600 |
| C  | 2.31473300  | -1.29246400 | -0.97643400 |
| C  | 3.55171900  | -0.96864300 | -0.59104600 |
| C  | 4.70348900  | -0.69280300 | -0.25517200 |
| C  | 6.02261300  | -0.37650100 | 0.11783700  |
| C  | 6.74746900  | 0.60266300  | -0.60331100 |
| C  | 6.63183800  | -1.03903800 | 1.21039900  |
| C  | 8.05069200  | 0.90710100  | -0.23318400 |
| C  | 7.93604700  | -0.72372200 | 1.56762400  |
| H  | 6.07130100  | -1.79008800 | 1.75673200  |
| C  | 8.64407100  | 0.24643100  | 0.84872600  |
| H  | 8.60881700  | 1.65596400  | -0.78555600 |
| H  | 8.40566700  | -1.23157500 | 2.40366800  |
| H  | 9.66402000  | 0.48766800  | 1.13217200  |
| H  | -0.58180100 | -7.56386800 | -1.10512500 |
| H  | 0.93081600  | -3.71626400 | 0.06177500  |
| H  | 6.27518300  | 1.10344100  | -1.44169600 |
| Au | -0.10647200 | -0.15598700 | -0.30611600 |
| C  | -1.46227200 | 1.12549700  | 0.48867900  |
| C  | -2.79041000 | 2.92356500  | 0.77752500  |
| C  | -3.10031300 | 2.02527900  | 1.74884700  |
| H  | -3.82032500 | 2.06269200  | 2.55034500  |
| H  | -3.18490400 | 3.90334900  | 0.56172300  |
| N  | -1.78278900 | 2.35584300  | 0.01099900  |
| N  | -2.27636500 | 0.92482500  | 1.55689500  |
| C  | -1.16442000 | 3.00144500  | -1.13179100 |
| C  | -0.04632300 | 3.82936100  | -0.90704000 |
| C  | -1.72279600 | 2.78963600  | -2.40824900 |
| C  | 0.52028900  | 4.45418300  | -2.02446300 |
| C  | -1.11330500 | 3.44363700  | -3.48630800 |

|   |             |             |             |
|---|-------------|-------------|-------------|
| C | -0.00543900 | 4.26513300  | -3.29962700 |
| H | 1.38253700  | 5.10033000  | -1.89199800 |
| H | -1.51437400 | 3.30658000  | -4.48534100 |
| H | 0.44862800  | 4.76236800  | -4.15153800 |
| C | -2.30259300 | -0.26532100 | 2.38453100  |
| C | -3.17075000 | -1.31473500 | 2.02266000  |
| C | -1.47862900 | -0.30584300 | 3.52673600  |
| C | -3.18815600 | -2.44282400 | 2.85242400  |
| C | -1.53937700 | -1.46037100 | 4.31682800  |
| C | -2.38269100 | -2.51728000 | 3.98529100  |
| H | -3.84523700 | -3.27170200 | 2.60864500  |
| H | -0.92099700 | -1.52943000 | 5.20639200  |
| H | -2.41643200 | -3.40072000 | 4.61594600  |
| C | -4.07663800 | -1.26178500 | 0.79628100  |
| C | -5.56512600 | -1.27389500 | 1.19787000  |
| C | -3.75916200 | -2.40018100 | -0.19250500 |
| H | -3.89053100 | -0.31929700 | 0.27244300  |
| H | -5.80587600 | -0.44740600 | 1.87395900  |
| H | -6.19919500 | -1.18123600 | 0.31034800  |
| H | -5.83625000 | -2.20620200 | 1.70368500  |
| H | -2.70727300 | -2.38458400 | -0.49543900 |
| H | -3.96630800 | -3.38234400 | 0.24443900  |
| H | -4.37478700 | -2.30276600 | -1.09250300 |
| C | -0.54787500 | 0.83600100  | 3.92420200  |
| C | 0.92852500  | 0.39589300  | 3.88373400  |
| C | -0.91927800 | 1.41424200  | 5.30388600  |
| H | -0.66229600 | 1.64326600  | 3.19455500  |
| H | 1.20319400  | 0.02627000  | 2.89026600  |
| H | 1.58316600  | 1.23881900  | 4.12858400  |
| H | 1.12920800  | -0.40142500 | 4.60673400  |
| H | -1.95753200 | 1.75991200  | 5.32711900  |
| H | -0.79940700 | 0.67043900  | 6.09801700  |
| H | -0.27338500 | 2.26430500  | 5.54608800  |
| C | -2.94466200 | 1.90858600  | -2.65074600 |
| C | -2.64582900 | 0.77745300  | -3.65415300 |
| C | -4.15313900 | 2.75005200  | -3.10845800 |
| H | -3.21961200 | 1.43552400  | -1.70290500 |
| H | -1.79681100 | 0.16383300  | -3.33781300 |
| H | -3.52000900 | 0.12588300  | -3.75522100 |
| H | -2.41631400 | 1.17218200  | -4.64908200 |
| H | -4.40152700 | 3.52883700  | -2.38022500 |
| H | -3.95589900 | 3.24187700  | -4.06641600 |
| H | -5.03365700 | 2.11248200  | -3.23715100 |
| C | 0.55203400  | 4.06482700  | 0.47684700  |

|                                              |             |            |                             |
|----------------------------------------------|-------------|------------|-----------------------------|
| C                                            | 0.47333000  | 5.54996000 | 0.88147700                  |
| C                                            | 1.99954400  | 3.54188000 | 0.56032400                  |
| H                                            | -0.03532600 | 3.49932600 | 1.20659600                  |
| H                                            | -0.55738800 | 5.91743000 | 0.85878200                  |
| H                                            | 0.86075900  | 5.68949200 | 1.89592000                  |
| H                                            | 1.06498100  | 6.18125200 | 0.21092100                  |
| H                                            | 2.05103100  | 2.47656400 | 0.31229800                  |
| H                                            | 2.65977600  | 4.07910500 | -0.12827700                 |
| H                                            | 2.39457000  | 3.67730400 | 1.57258000                  |
| Zero-point correction=                       |             |            | 0.785448 (Hartree/Particle) |
| Thermal correction to Energy=                |             |            | 0.834686                    |
| Thermal correction to Enthalpy=              |             |            | 0.835630                    |
| Thermal correction to Gibbs Free Energy=     |             |            | 0.692389                    |
| Sum of electronic and zero-point Energies=   |             |            | -2023.592678                |
| Sum of electronic and thermal Energies=      |             |            | -2023.543440                |
| Sum of electronic and thermal Enthalpies=    |             |            | -2023.542496                |
| Sum of electronic and thermal Free Energies= |             |            | -2023.685737                |

#### INT1'

|   |             |             |             |
|---|-------------|-------------|-------------|
| C | -4.84215600 | 0.55314500  | 0.00036900  |
| O | -4.49551400 | 1.73169300  | 0.00103400  |
| C | -6.24526900 | 0.09657000  | 0.00012100  |
| C | -7.26395000 | 1.06519100  | 0.00069900  |
| C | -6.57441600 | -1.26851100 | -0.00066500 |
| C | -8.59576500 | 0.66798100  | 0.00049300  |
| H | -6.98678800 | 2.11389500  | 0.00130400  |
| C | -7.91038300 | -1.66109900 | -0.00086700 |
| C | -8.91936000 | -0.69411800 | -0.00028800 |
| H | -9.38467500 | 1.41345300  | 0.00093900  |
| H | -8.16692400 | -2.71567800 | -0.00147400 |
| C | -3.77546000 | -0.44822000 | -0.00021600 |
| C | -2.76324800 | -1.13494600 | -0.00060800 |
| C | -1.63669000 | -1.88981300 | -0.00102700 |
| C | -0.62489500 | -2.62750100 | -0.00146500 |
| C | 0.08387000  | -3.87511900 | -0.00212500 |
| C | 1.48969100  | -3.94052400 | -0.00246300 |
| C | -0.66933600 | -5.06957700 | -0.00243200 |
| C | 2.12890800  | -5.17620600 | -0.00309800 |
| C | -0.01921600 | -6.29823100 | -0.00306200 |
| H | -1.75308900 | -5.01926200 | -0.00217000 |
| C | 1.37802600  | -6.35475500 | -0.00339700 |
| H | 3.21317100  | -5.22129600 | -0.00335900 |
| H | -0.60219700 | -7.21364200 | -0.00329400 |

|    |             |             |             |
|----|-------------|-------------|-------------|
| H  | 1.88045100  | -7.31700200 | -0.00389400 |
| H  | -9.96088300 | -1.00145200 | -0.00044500 |
| H  | -5.78643900 | -2.01632400 | -0.00111400 |
| H  | 2.06883600  | -3.02316700 | -0.00222600 |
| Au | 0.34605200  | -0.58764000 | -0.00035200 |
| C  | 1.53071600  | 1.04760800  | 0.00055900  |
| C  | 2.71858100  | 2.83353900  | 0.68150100  |
| C  | 2.71848100  | 2.83436800  | -0.67838400 |
| H  | 3.16415100  | 3.51039800  | -1.39007300 |
| H  | 3.16435600  | 3.50869900  | 1.39395000  |
| N  | 1.98652300  | 1.72805500  | 1.08397700  |
| N  | 1.98637300  | 1.72936600  | -1.08209600 |
| C  | 1.75727200  | 1.37212300  | 2.47280100  |
| C  | 0.60366700  | 1.86833300  | 3.11208300  |
| C  | 2.72231600  | 0.57829900  | 3.12547800  |
| C  | 0.43147100  | 1.53309400  | 4.46115900  |
| C  | 2.49519400  | 0.28014700  | 4.47437200  |
| C  | 1.36378600  | 0.75033900  | 5.13570700  |
| H  | -0.44452500 | 1.89535700  | 4.98964700  |
| H  | 3.21648700  | -0.32468300 | 5.01460700  |
| H  | 1.21010500  | 0.50804700  | 6.18297600  |
| C  | 1.75696800  | 1.37508100  | -2.47131700 |
| C  | 2.72193800  | 0.58202700  | -3.12504000 |
| C  | 0.60328900  | 1.87204200  | -3.10988400 |
| C  | 2.49465800  | 0.28546000  | -4.47425600 |
| C  | 0.43093100  | 1.53838200  | -4.45933200 |
| C  | 1.36316800  | 0.75642100  | -5.13490500 |
| H  | 3.21589700  | -0.31871900 | -5.01529100 |
| H  | -0.44512500 | 1.90126600  | -4.98729300 |
| H  | 1.20937200  | 0.51536400  | -6.18244300 |
| C  | 3.98315500  | 0.06741400  | -2.43720300 |
| C  | 5.24612100  | 0.73651000  | -3.01607700 |
| C  | 4.08989600  | -1.46767500 | -2.51125800 |
| H  | 3.92928200  | 0.33445400  | -1.37713000 |
| H  | 5.20007000  | 1.82663000  | -2.92902000 |
| H  | 6.13917400  | 0.39153800  | -2.48513400 |
| H  | 5.37371800  | 0.49428900  | -4.07600700 |
| H  | 3.20010700  | -1.95012200 | -2.09413500 |
| H  | 4.20337100  | -1.81639500 | -3.54240600 |
| H  | 4.96441700  | -1.81303800 | -1.95018900 |
| C  | -0.43635800 | 2.73934100  | -2.40655900 |
| C  | -1.82274000 | 2.06702800  | -2.40974300 |
| C  | -0.49988700 | 4.15172100  | -3.02063800 |
| H  | -0.13724600 | 2.85480600  | -1.36029000 |

|                                              |             |             |                             |
|----------------------------------------------|-------------|-------------|-----------------------------|
| H                                            | -1.77277900 | 1.05732800  | -1.99035600                 |
| H                                            | -2.53357700 | 2.64131200  | -1.80891500                 |
| H                                            | -2.22695700 | 1.98728100  | -3.42428100                 |
| H                                            | 0.47275100  | 4.65258300  | -2.98108900                 |
| H                                            | -0.81403200 | 4.11821300  | -4.06874600                 |
| H                                            | -1.22234000 | 4.76867000  | -2.47708500                 |
| C                                            | 3.98342500  | 0.06442800  | 2.43688400                  |
| C                                            | 4.08998500  | -1.47076800 | 2.50899200                  |
| C                                            | 5.24651600  | 0.73264200  | 3.01650200                  |
| H                                            | 3.92950900  | 0.33281800  | 1.37715400                  |
| H                                            | 3.20013000  | -1.95258900 | 2.09128600                  |
| H                                            | 4.96445200  | -1.81553100 | 1.94746900                  |
| H                                            | 4.20344000  | -1.82079100 | 3.53970200                  |
| H                                            | 5.20056700  | 1.82287800  | 2.93085800                  |
| H                                            | 5.37420100  | 0.48903700  | 4.07610300                  |
| H                                            | 6.13947800  | 0.38826200  | 2.48502300                  |
| C                                            | -0.43608400 | 2.73641200  | 2.40987500                  |
| C                                            | -0.49970200 | 4.14804100  | 3.02566700                  |
| C                                            | -1.82240700 | 2.06396800  | 2.41229600                  |
| H                                            | -0.13703100 | 2.85317000  | 1.36373300                  |
| H                                            | 0.47290300  | 4.64901300  | 2.98672500                  |
| H                                            | -1.22219600 | 4.76560100  | 2.48286300                  |
| H                                            | -0.81384800 | 4.11324400  | 4.07373200                  |
| H                                            | -1.77236100 | 1.05478300  | 1.99168000                  |
| H                                            | -2.22657300 | 1.98294400  | 3.42675200                  |
| H                                            | -2.53332900 | 2.63890800  | 1.81219500                  |
| Zero-point correction=                       |             |             | 0.786085 (Hartree/Particle) |
| Thermal correction to Energy=                |             |             | 0.835093                    |
| Thermal correction to Enthalpy=              |             |             | 0.836037                    |
| Thermal correction to Gibbs Free Energy=     |             |             | 0.696082                    |
| Sum of electronic and zero-point Energies=   |             |             | -2023.587049                |
| Sum of electronic and thermal Energies=      |             |             | -2023.538041                |
| Sum of electronic and thermal Enthalpies=    |             |             | -2023.537097                |
| Sum of electronic and thermal Free Energies= |             |             | -2023.677051                |

#### 1-TS1

|   |             |            |             |
|---|-------------|------------|-------------|
| C | -0.51472200 | 2.38833400 | -1.40691300 |
| O | -0.14629500 | 2.49464000 | -2.56246100 |
| C | -0.77205700 | 3.56804200 | -0.52979500 |
| C | -0.66890100 | 4.84570500 | -1.10136600 |
| C | -1.10517500 | 3.44021400 | 0.82771700  |
| C | -0.90672800 | 5.97871200 | -0.32815200 |
| H | -0.40544200 | 4.92293100 | -2.15080400 |

|    |             |             |             |
|----|-------------|-------------|-------------|
| C  | -1.33985400 | 4.57808400  | 1.60079700  |
| C  | -1.24357800 | 5.84702800  | 1.02268200  |
| H  | -0.82982700 | 6.96515800  | -0.77519300 |
| H  | -1.58956800 | 4.47693000  | 2.65284600  |
| C  | -0.67953200 | 1.01167100  | -0.81167000 |
| C  | -1.77072100 | 0.32809100  | -0.72161500 |
| C  | -2.50692400 | -0.77021700 | -0.41122200 |
| C  | -3.21800300 | -1.73020400 | -0.13558600 |
| C  | -4.00609500 | -2.86672000 | 0.17878500  |
| C  | -4.24151700 | -3.85944400 | -0.79779600 |
| C  | -4.56254800 | -3.01487000 | 1.46816500  |
| C  | -5.01740400 | -4.97064000 | -0.48589700 |
| C  | -5.33646500 | -4.13073500 | 1.76766500  |
| H  | -4.37647500 | -2.25309600 | 2.21823800  |
| C  | -5.56546600 | -5.10743800 | 0.79335200  |
| H  | -5.19693900 | -5.73164100 | -1.23875400 |
| H  | -5.76193200 | -4.24213100 | 2.76001200  |
| H  | -6.17107000 | -5.97656300 | 1.03149800  |
| H  | -1.42645500 | 6.73191600  | 1.62515300  |
| H  | -1.17039900 | 2.45406000  | 1.27744600  |
| H  | -3.80960100 | -3.74489700 | -1.78656700 |
| Au | 1.10006500  | 0.07271300  | -0.25738800 |
| C  | 2.91052300  | -0.74596200 | 0.18611700  |
| C  | 5.12636700  | -0.96095900 | 0.57113500  |
| C  | 4.58145800  | -2.20366600 | 0.62182400  |
| H  | 5.02519500  | -3.16964600 | 0.80099900  |
| H  | 6.14217900  | -0.62338000 | 0.69828100  |
| N  | 4.08883700  | -0.07782600 | 0.30443800  |
| N  | 3.22110700  | -2.05490400 | 0.38259300  |
| C  | 4.25990900  | 1.35527300  | 0.16760800  |
| C  | 4.48382300  | 1.88620200  | -1.11887500 |
| C  | 4.22490600  | 2.14848100  | 1.33186200  |
| C  | 4.68109400  | 3.26954400  | -1.21229000 |
| C  | 4.42934100  | 3.52470000  | 1.17459100  |
| C  | 4.65601600  | 4.08038500  | -0.08133400 |
| H  | 4.86002400  | 3.71562100  | -2.18532000 |
| H  | 4.41217400  | 4.16862900  | 2.04823000  |
| H  | 4.81515300  | 5.15018900  | -0.17909900 |
| C  | 2.28308500  | -3.15772500 | 0.33641900  |
| C  | 1.63510400  | -3.54066400 | 1.52758700  |
| C  | 2.08244900  | -3.81633500 | -0.89318400 |
| C  | 0.75283900  | -4.62566700 | 1.45602000  |
| C  | 1.18855500  | -4.89434900 | -0.90259900 |
| C  | 0.53104500  | -5.29634800 | 0.25649700  |



|   |             |             |             |
|---|-------------|-------------|-------------|
| H | 0.23749500  | -4.95175200 | 2.35414100  |
| H | 1.00960800  | -5.42719200 | -1.83120500 |
| H | -0.15350200 | -6.13901000 | 0.22616900  |
| C | 1.85652400  | -2.83137200 | 2.85994100  |
| C | 2.44984600  | -3.78330700 | 3.91708000  |
| C | 0.55784900  | -2.17528100 | 3.36806300  |
| H | 2.58219900  | -2.02791800 | 2.70339700  |
| H | 3.39060300  | -4.22571100 | 3.57478400  |
| H | 2.64862800  | -3.24191100 | 4.84764600  |
| H | 1.76308200  | -4.60322200 | 4.15104900  |
| H | 0.15195900  | -1.47829400 | 2.62775400  |
| H | -0.21128000 | -2.92455100 | 3.58338500  |
| H | 0.74912300  | -1.62109100 | 4.29296600  |
| C | 2.78541300  | -3.40519300 | -2.18356600 |
| C | 1.77648200  | -2.91369200 | -3.24023000 |
| C | 3.66200300  | -4.54517800 | -2.73874800 |
| H | 3.45119500  | -2.56674700 | -1.95926100 |
| H | 1.18712400  | -2.07058100 | -2.86579900 |
| H | 2.30226800  | -2.58685600 | -4.14325600 |
| H | 1.08224800  | -3.70924600 | -3.53048400 |
| H | 4.40194000  | -4.87757200 | -2.00374000 |
| H | 3.06083300  | -5.41534000 | -3.02175000 |
| H | 4.19816100  | -4.20958100 | -3.63213700 |
| C | 3.98097400  | 1.57419100  | 2.72450800  |
| C | 2.72461900  | 2.18468000  | 3.37505800  |
| C | 5.21640200  | 1.74957400  | 3.62963700  |
| H | 3.80057900  | 0.49954100  | 2.62610800  |
| H | 1.84346600  | 2.04510200  | 2.74097800  |
| H | 2.53056700  | 1.71060800  | 4.34302900  |
| H | 2.84375100  | 3.25855100  | 3.55161800  |
| H | 6.10387300  | 1.28097100  | 3.19258000  |
| H | 5.44676000  | 2.80752100  | 3.79152200  |
| H | 5.04003600  | 1.29374800  | 4.60934900  |
| C | 4.54389900  | 1.02563300  | -2.37734500 |
| C | 5.98525900  | 0.94742200  | -2.92099000 |
| C | 3.56796900  | 1.51822100  | -3.46332000 |
| H | 4.23974400  | 0.00904200  | -2.11046400 |
| H | 6.67792600  | 0.54774500  | -2.17307300 |
| H | 6.02649200  | 0.29883300  | -3.80214500 |
| H | 6.35103600  | 1.93608300  | -3.21712800 |
| H | 2.54068300  | 1.57919700  | -3.09171500 |
| H | 3.84693200  | 2.50815000  | -3.83855700 |
| H | 3.58219400  | 0.83201700  | -4.31645300 |
| C | -4.61400800 | 2.39887100  | 0.02878100  |

|                                              |             |             |                             |
|----------------------------------------------|-------------|-------------|-----------------------------|
| C                                            | -5.87236800 | 2.41335000  | 0.61122500                  |
| C                                            | -6.87821400 | 1.54706100  | 0.17486200                  |
| C                                            | -6.56883100 | 0.67075500  | -0.86415500                 |
| C                                            | -5.30360200 | 0.66508800  | -1.43937400                 |
| H                                            | -7.86346200 | 1.56024300  | 0.62417400                  |
| H                                            | -3.79138300 | 3.04186000  | 0.31244700                  |
| H                                            | -5.00032200 | 0.03012700  | -2.25867800                 |
| Cl                                           | -7.76026800 | -0.43579000 | -1.46690600                 |
| Cl                                           | -6.18117900 | 3.53218000  | 1.90078400                  |
| N                                            | -4.35886500 | 1.53226300  | -0.98977100                 |
| O                                            | -3.17769100 | 1.53253400  | -1.55617100                 |
| Zero-point correction=                       |             |             | 0.859544 (Hartree/Particle) |
| Thermal correction to Energy=                |             |             | 0.917391                    |
| Thermal correction to Enthalpy=              |             |             | 0.918335                    |
| Thermal correction to Gibbs Free Energy=     |             |             | 0.752937                    |
| Sum of electronic and zero-point Energies=   |             |             | -3266.145081                |
| Sum of electronic and thermal Energies=      |             |             | -3266.087235                |
| Sum of electronic and thermal Enthalpies=    |             |             | -3266.086291                |
| Sum of electronic and thermal Free Energies= |             |             | -3266.251689                |

#### 1-INT1

|   |             |             |             |
|---|-------------|-------------|-------------|
| C | -0.37060800 | -2.89633400 | -0.39468800 |
| O | -0.76376100 | -3.51108400 | 0.60370400  |
| C | 0.44939200  | -3.57074300 | -1.43522100 |
| C | 0.85003500  | -4.89947800 | -1.21786500 |
| C | 0.78061000  | -2.93514100 | -2.64275800 |
| C | 1.57639600  | -5.57833700 | -2.19088300 |
| H | 0.57722300  | -5.37718100 | -0.28300300 |
| C | 1.49993900  | -3.62156900 | -3.61956700 |
| C | 1.90044300  | -4.94075700 | -3.39317700 |
| H | 1.88741000  | -6.60433600 | -2.01900500 |
| H | 1.74786900  | -3.13036900 | -4.55549000 |
| C | -0.69592400 | -1.44474600 | -0.53719400 |
| C | -1.94152100 | -1.07277100 | -0.85852700 |
| C | -2.55468200 | 0.19330400  | -0.98000600 |
| C | -3.17800200 | 1.23310000  | -1.10513200 |
| C | -3.89061300 | 2.45954300  | -1.26670800 |
| C | -4.46426300 | 3.10595000  | -0.15386300 |
| C | -4.03860500 | 3.03171600  | -2.54625200 |
| C | -5.16986700 | 4.29471200  | -0.32170400 |
| C | -4.74390200 | 4.22202100  | -2.70350200 |
| H | -3.59696700 | 2.53506700  | -3.40418700 |
| C | -5.31136400 | 4.85500500  | -1.59434900 |

|    |             |             |             |
|----|-------------|-------------|-------------|
| H  | -5.61273100 | 4.78471800  | 0.54025000  |
| H  | -4.85348600 | 4.65586000  | -3.69272900 |
| H  | -5.86372200 | 5.78110500  | -1.72140200 |
| H  | 2.46248900  | -5.47400200 | -4.15442900 |
| H  | 0.47029200  | -1.90927900 | -2.81517600 |
| H  | -4.34733300 | 2.66894000  | 0.83253900  |
| Au | 0.81818700  | -0.12946700 | -0.06197900 |
| C  | 2.34406900  | 1.13599900  | 0.46477700  |
| C  | 3.52524000  | 2.96783700  | 1.07930600  |
| C  | 4.39198900  | 1.92480800  | 1.02281400  |
| H  | 5.45137500  | 1.86803400  | 1.21377900  |
| H  | 3.67420100  | 4.00584900  | 1.32907300  |
| N  | 2.27549200  | 2.46848700  | 0.73535300  |
| N  | 3.65415300  | 0.81073800  | 0.64483800  |
| C  | 1.07447300  | 3.27676000  | 0.69734000  |
| C  | 0.72331600  | 3.90666200  | -0.51284000 |
| C  | 0.32949600  | 3.42589000  | 1.88399500  |
| C  | -0.42896200 | 4.70210200  | -0.51028700 |
| C  | -0.81184000 | 4.23497800  | 1.82601800  |
| C  | -1.18913300 | 4.86606500  | 0.64399900  |
| H  | -0.73394100 | 5.20018800  | -1.42519900 |
| H  | -1.40979200 | 4.37474300  | 2.72143900  |
| H  | -2.07966900 | 5.48658000  | 0.62039400  |
| C  | 4.22672100  | -0.50783500 | 0.46566300  |
| C  | 4.23171400  | -1.39638500 | 1.55914600  |
| C  | 4.78733000  | -0.82964600 | -0.78685400 |
| C  | 4.81911100  | -2.65219800 | 1.36063200  |
| C  | 5.36484500  | -2.09758000 | -0.92369600 |
| C  | 5.37958000  | -3.00086600 | 0.13539300  |
| H  | 4.84072800  | -3.36421100 | 2.17978200  |
| H  | 5.80981300  | -2.37981800 | -1.87254300 |
| H  | 5.83329600  | -3.97905700 | 0.00633100  |
| C  | 3.64804100  | -1.04327300 | 2.92399300  |
| C  | 4.74472000  | -0.99974300 | 4.00673900  |
| C  | 2.51130700  | -2.00444400 | 3.32170100  |
| H  | 3.21403900  | -0.04118400 | 2.86221700  |
| H  | 5.53483100  | -0.28691800 | 3.74982800  |
| H  | 4.31756400  | -0.70001100 | 4.96931100  |
| H  | 5.21344100  | -1.97977900 | 4.14238800  |
| H  | 1.71546200  | -2.01121200 | 2.57056600  |
| H  | 2.87377200  | -3.03112300 | 3.43666800  |
| H  | 2.07640600  | -1.69918400 | 4.27929400  |
| C  | 4.80783000  | 0.14557100  | -1.96052500 |
| C  | 4.17866300  | -0.46221000 | -3.22807200 |

|                                          |             |             |                             |
|------------------------------------------|-------------|-------------|-----------------------------|
| C                                        | 6.23962000  | 0.64550000  | -2.24021300                 |
| H                                        | 4.20320000  | 1.01662600  | -1.69089900                 |
| H                                        | 3.16185700  | -0.81598200 | -3.03476400                 |
| H                                        | 4.13812600  | 0.28794000  | -4.02478300                 |
| H                                        | 4.76234600  | -1.30847600 | -3.60438200                 |
| H                                        | 6.67837200  | 1.12447400  | -1.35905100                 |
| H                                        | 6.89828600  | -0.17966600 | -2.53048100                 |
| H                                        | 6.23808700  | 1.37527900  | -3.05651500                 |
| C                                        | 0.71291600  | 2.74966900  | 3.19676700                  |
| C                                        | -0.35274300 | 1.72319400  | 3.62907000                  |
| C                                        | 0.97772500  | 3.78020300  | 4.31153700                  |
| H                                        | 1.64452400  | 2.19843100  | 3.03889600                  |
| H                                        | -0.50679800 | 0.96475100  | 2.85482600                  |
| H                                        | -0.04137400 | 1.21658500  | 4.54865900                  |
| H                                        | -1.31556500 | 2.20676800  | 3.82619100                  |
| H                                        | 1.75505600  | 4.49396600  | 4.02113500                  |
| H                                        | 0.07645400  | 4.35201700  | 4.55539200                  |
| H                                        | 1.30579500  | 3.27481100  | 5.22562700                  |
| C                                        | 1.53494700  | 3.75241800  | -1.79509100                 |
| C                                        | 2.07953600  | 5.10700100  | -2.28857700                 |
| C                                        | 0.71547800  | 3.04721100  | -2.89323200                 |
| H                                        | 2.39831800  | 3.11637700  | -1.57820800                 |
| H                                        | 2.68849900  | 5.59766300  | -1.52270800                 |
| H                                        | 2.70283700  | 4.96446300  | -3.17732900                 |
| H                                        | 1.26999900  | 5.79280400  | -2.55918400                 |
| H                                        | 0.35352200  | 2.07287400  | -2.55030700                 |
| H                                        | -0.15417300 | 3.64406600  | -3.18804500                 |
| H                                        | 1.33052300  | 2.89248500  | -3.78605400                 |
| C                                        | -3.63454100 | -2.78563400 | 0.90505700                  |
| C                                        | -4.70034800 | -2.95718700 | 1.78450100                  |
| C                                        | -6.00222400 | -2.63011400 | 1.39599400                  |
| C                                        | -6.21391200 | -2.12355700 | 0.11140200                  |
| C                                        | -5.13875700 | -1.95105700 | -0.75360200                 |
| H                                        | -6.83357700 | -2.76779300 | 2.07789500                  |
| H                                        | -2.58352100 | -3.02500700 | 1.10169200                  |
| H                                        | -5.20234900 | -1.56400900 | -1.76086100                 |
| Cl                                       | -7.79986900 | -1.69472100 | -0.42393200                 |
| Cl                                       | -4.38885500 | -3.59216600 | 3.36097100                  |
| N                                        | -3.91264100 | -2.29603700 | -0.31843800                 |
| O                                        | -2.88130500 | -2.16590100 | -1.23267500                 |
| Zero-point correction=                   |             |             | 0.862227 (Hartree/Particle) |
| Thermal correction to Energy=            |             |             | 0.919476                    |
| Thermal correction to Enthalpy=          |             |             | 0.920421                    |
| Thermal correction to Gibbs Free Energy= |             |             | 0.758243                    |

|                                              |              |
|----------------------------------------------|--------------|
| Sum of electronic and zero-point Energies=   | -3266.161367 |
| Sum of electronic and thermal Energies=      | -3266.104118 |
| Sum of electronic and thermal Enthalpies=    | -3266.103173 |
| Sum of electronic and thermal Free Energies= | -3266.265351 |

1-TS2

|    |             |             |             |
|----|-------------|-------------|-------------|
| C  | -0.94501300 | -2.62659300 | -0.33760900 |
| O  | -1.39642200 | -3.08369100 | 0.71636600  |
| C  | -0.35893500 | -3.49002000 | -1.38952100 |
| C  | -0.21778500 | -4.86310000 | -1.12943100 |
| C  | 0.01600300  | -2.97576800 | -2.64123900 |
| C  | 0.29849900  | -5.70755600 | -2.10688600 |
| H  | -0.51914800 | -5.24237600 | -0.15874800 |
| C  | 0.52689800  | -3.82612500 | -3.62014500 |
| C  | 0.67043000  | -5.19009700 | -3.35244500 |
| H  | 0.40978800  | -6.76831700 | -1.90411800 |
| H  | 0.80997800  | -3.42869300 | -4.58987800 |
| C  | -0.94702800 | -1.13726400 | -0.47620100 |
| C  | -2.14523300 | -0.52849200 | -0.81857700 |
| C  | -2.45648800 | 0.85628600  | -0.67999800 |
| C  | -2.83281500 | 2.00717800  | -0.55483100 |
| C  | -3.26705200 | 3.35923700  | -0.41672200 |
| C  | -3.36146500 | 3.95319900  | 0.85756800  |
| C  | -3.61459900 | 4.11293100  | -1.55528100 |
| C  | -3.79132300 | 5.27164900  | 0.98460100  |
| C  | -4.03745900 | 5.43268900  | -1.41794700 |
| H  | -3.54476500 | 3.65572800  | -2.53695600 |
| C  | -4.12698900 | 6.01475200  | -0.15057800 |
| H  | -3.86814000 | 5.72029300  | 1.97048200  |
| H  | -4.30240500 | 6.00713200  | -2.30040200 |
| H  | -4.46196400 | 7.04239600  | -0.04744700 |
| H  | 1.06957900  | -5.85158300 | -4.11576900 |
| H  | -0.09805200 | -1.91614900 | -2.84925500 |
| H  | -3.10035800 | 3.37124100  | 1.73529800  |
| Au | 0.80967300  | -0.18636200 | -0.09517400 |
| C  | 2.60446100  | 0.71751300  | 0.33920200  |
| C  | 4.23560900  | 2.25386400  | 0.64767200  |
| C  | 4.74620700  | 1.04227600  | 0.98953600  |
| H  | 5.72141500  | 0.75610200  | 1.34897900  |
| H  | 4.67534400  | 3.23814100  | 0.64813900  |
| N  | 2.92294900  | 2.03755600  | 0.25351100  |
| N  | 3.73582500  | 0.11195800  | 0.79331600  |
| C  | 2.02349300  | 3.09023600  | -0.17214400 |

|   |             |             |             |
|---|-------------|-------------|-------------|
| C | 1.94446600  | 3.39681400  | -1.54489500 |
| C | 1.28839800  | 3.77944100  | 0.81279800  |
| C | 1.07427900  | 4.42776400  | -1.92048600 |
| C | 0.43587900  | 4.80063300  | 0.37675700  |
| C | 0.32562500  | 5.12041200  | -0.97357000 |
| H | 0.98584800  | 4.69229400  | -2.96955000 |
| H | -0.15254700 | 5.35140800  | 1.10346600  |
| H | -0.34660800 | 5.91308700  | -1.28755300 |
| C | 3.89376700  | -1.30915700 | 1.03061800  |
| C | 3.50529300  | -1.83378700 | 2.27950900  |
| C | 4.46404000  | -2.09704000 | 0.01040500  |
| C | 3.69728700  | -3.20588900 | 2.48396600  |
| C | 4.63691900  | -3.46082100 | 0.27574400  |
| C | 4.25721500  | -4.01142900 | 1.49662700  |
| H | 3.40831100  | -3.64644400 | 3.43300700  |
| H | 5.07588600  | -4.09855200 | -0.48500100 |
| H | 4.40171600  | -5.07189900 | 1.68066600  |
| C | 2.91045800  | -0.98040300 | 3.39565700  |
| C | 3.83223500  | -0.95209000 | 4.63116700  |
| C | 1.49149200  | -1.44965400 | 3.77097500  |
| H | 2.82492000  | 0.04776000  | 3.03181700  |
| H | 4.83189000  | -0.58488800 | 4.37797300  |
| H | 3.41516600  | -0.29589800 | 5.40205400  |
| H | 3.94567400  | -1.94862200 | 5.07008500  |
| H | 0.82755900  | -1.44723200 | 2.90062500  |
| H | 1.49978600  | -2.46451500 | 4.18167200  |
| H | 1.06326700  | -0.78862000 | 4.53185700  |
| C | 4.90150800  | -1.52586300 | -1.33559100 |
| C | 4.19371300  | -2.22520700 | -2.51163500 |
| C | 6.43386800  | -1.58850600 | -1.49574700 |
| H | 4.61273300  | -0.47113800 | -1.37004600 |
| H | 3.10556400  | -2.16524300 | -2.41577100 |
| H | 4.48245900  | -1.75505700 | -3.45762400 |
| H | 4.46504900  | -3.28392200 | -2.57463400 |
| H | 6.94557800  | -1.05611500 | -0.68759500 |
| H | 6.79247600  | -2.62289600 | -1.48942800 |
| H | 6.73775800  | -1.13604200 | -2.44526400 |
| C | 1.39292200  | 3.46155300  | 2.30181400  |
| C | 0.04750400  | 2.97546300  | 2.87412300  |
| C | 1.93294700  | 4.66611400  | 3.09771500  |
| H | 2.10764100  | 2.64328900  | 2.42890100  |
| H | -0.31936500 | 2.09863200  | 2.33116600  |
| H | 0.16033900  | 2.70437400  | 3.92910900  |
| H | -0.71776400 | 3.75619000  | 2.81260100  |

|                                              |             |             |                             |
|----------------------------------------------|-------------|-------------|-----------------------------|
| H                                            | 2.90723700  | 4.99256800  | 2.72035900                  |
| H                                            | 1.25233500  | 5.52180800  | 3.04129000                  |
| H                                            | 2.04930700  | 4.40358000  | 4.15420700                  |
| C                                            | 2.76225900  | 2.67092600  | -2.60890700                 |
| C                                            | 3.73119400  | 3.63215300  | -3.32549100                 |
| C                                            | 1.85545500  | 1.93933900  | -3.61736900                 |
| H                                            | 3.37035800  | 1.90930100  | -2.11216600                 |
| H                                            | 4.40430200  | 4.12465600  | -2.61662300                 |
| H                                            | 4.34312500  | 3.08539900  | -4.05032100                 |
| H                                            | 3.19254400  | 4.41460500  | -3.86976900                 |
| H                                            | 1.19164900  | 1.23220400  | -3.10938100                 |
| H                                            | 1.23177500  | 2.64160700  | -4.18003400                 |
| H                                            | 2.46244100  | 1.38325400  | -4.33940400                 |
| C                                            | -4.29478100 | -2.06375200 | 0.83853300                  |
| C                                            | -5.44158000 | -2.31696300 | 1.59836100                  |
| C                                            | -6.70443700 | -2.07104800 | 1.05466500                  |
| C                                            | -6.79499000 | -1.57054100 | -0.24731200                 |
| C                                            | -5.62837600 | -1.32345200 | -0.97311600                 |
| H                                            | -7.60049800 | -2.26695900 | 1.63208600                  |
| H                                            | -3.27245000 | -2.26025400 | 1.16850800                  |
| H                                            | -5.60660800 | -0.93051900 | -1.98281300                 |
| Cl                                           | -8.33610400 | -1.24442800 | -0.96702200                 |
| Cl                                           | -5.28034500 | -2.94586700 | 3.20372000                  |
| N                                            | -4.46666600 | -1.58272000 | -0.38517600                 |
| O                                            | -3.06398500 | -1.30705100 | -1.40030500                 |
| Zero-point correction=                       |             |             | 0.859782 (Hartree/Particle) |
| Thermal correction to Energy=                |             |             | 0.917258                    |
| Thermal correction to Enthalpy=              |             |             | 0.918202                    |
| Thermal correction to Gibbs Free Energy=     |             |             | 0.755656                    |
| Sum of electronic and zero-point Energies=   |             |             | -3266.149725                |
| Sum of electronic and thermal Energies=      |             |             | -3266.092249                |
| Sum of electronic and thermal Enthalpies=    |             |             | -3266.091305                |
| Sum of electronic and thermal Free Energies= |             |             | -3266.253851                |

#### 1-INT2

|   |             |            |             |
|---|-------------|------------|-------------|
| C | -1.15455900 | 2.88658800 | -0.23097200 |
| O | -1.65783900 | 2.63102700 | -1.33340800 |
| C | -0.67056500 | 4.15623800 | 0.27451600  |
| C | -0.70755300 | 5.28524500 | -0.56568500 |
| C | -0.18317900 | 4.25567400 | 1.59052200  |
| C | -0.25305000 | 6.50717800 | -0.08713300 |
| H | -1.09211300 | 5.18310900 | -1.57543700 |
| C | 0.26620500  | 5.48592900 | 2.06037400  |

|    |             |             |             |
|----|-------------|-------------|-------------|
| C  | 0.23283400  | 6.60565500  | 1.22308400  |
| H  | -0.27594700 | 7.38430700  | -0.72561600 |
| H  | 0.63835200  | 5.57610500  | 3.07558900  |
| C  | -1.19786800 | 1.56277800  | 0.40186000  |
| C  | -2.36983100 | 1.31118300  | 1.27948800  |
| C  | -3.65860700 | 1.01572700  | 0.79744700  |
| C  | -4.77391500 | 0.78120400  | 0.35923300  |
| C  | -6.07010600 | 0.51230300  | -0.14059100 |
| C  | -6.30261600 | 0.49654900  | -1.53328100 |
| C  | -7.13478800 | 0.26282300  | 0.75286300  |
| C  | -7.57925200 | 0.23443200  | -2.01647000 |
| C  | -8.40611000 | 0.00173700  | 0.25506900  |
| H  | -6.94874100 | 0.27871200  | 1.82152300  |
| C  | -8.62904200 | -0.01277000 | -1.12566000 |
| H  | -7.75988500 | 0.22351700  | -3.08653500 |
| H  | -9.22529100 | -0.18933500 | 0.94073300  |
| H  | -9.62444000 | -0.21599500 | -1.50872600 |
| H  | 0.58533700  | 7.56366000  | 1.59358000  |
| H  | -0.17640300 | 3.38066200  | 2.23354000  |
| H  | -5.48008300 | 0.69278700  | -2.21304800 |
| Au | 0.21426700  | 0.15720800  | 0.11707500  |
| C  | 1.65363600  | -1.27214300 | -0.13765600 |
| C  | 2.71850400  | -3.25858800 | -0.21709500 |
| C  | 3.61321400  | -2.29902400 | -0.57667400 |
| H  | 4.65097300  | -2.36453600 | -0.86143100 |
| H  | 2.82017500  | -4.32810600 | -0.12697200 |
| N  | 1.52191500  | -2.61161700 | 0.04849900  |
| N  | 2.94365600  | -1.08667200 | -0.52272900 |
| C  | 0.30191300  | -3.28334300 | 0.45428000  |
| C  | 0.05413900  | -3.45397700 | 1.83115600  |
| C  | -0.56879900 | -3.75224800 | -0.54984500 |
| C  | -1.12248000 | -4.12430900 | 2.18842500  |
| C  | -1.72871200 | -4.41482700 | -0.13000300 |
| C  | -2.00398000 | -4.60017800 | 1.22194100  |
| H  | -1.34833500 | -4.27765600 | 3.23887500  |
| H  | -2.42273400 | -4.79326500 | -0.87375100 |
| H  | -2.90802100 | -5.12056000 | 1.52384200  |
| C  | 3.54752700  | 0.19664800  | -0.82508000 |
| C  | 3.48116500  | 0.67568900  | -2.14879100 |
| C  | 4.18777200  | 0.89638200  | 0.21733400  |
| C  | 4.08201800  | 1.91362600  | -2.40929800 |
| C  | 4.77000900  | 2.12844300  | -0.10516000 |
| C  | 4.71825800  | 2.63307400  | -1.40160800 |
| H  | 4.05374700  | 2.31643100  | -3.41687600 |



|                        |             |             |                             |
|------------------------|-------------|-------------|-----------------------------|
| H                      | 5.27370900  | 2.69747700  | 0.66988500                  |
| H                      | 5.18024200  | 3.58921800  | -1.62886400                 |
| C                      | 2.80478800  | -0.09140400 | -3.28114400                 |
| C                      | 3.82371200  | -0.50927500 | -4.36030800                 |
| C                      | 1.64089500  | 0.71069200  | -3.89527000                 |
| H                      | 2.37802200  | -1.00974400 | -2.86669900                 |
| H                      | 4.63469600  | -1.10965400 | -3.93596900                 |
| H                      | 3.33271200  | -1.10360800 | -5.13751900                 |
| H                      | 4.27505900  | 0.36254100  | -4.84466000                 |
| H                      | 0.89878200  | 0.98319300  | -3.13785000                 |
| H                      | 1.99268800  | 1.63360800  | -4.36737300                 |
| H                      | 1.13802700  | 0.11759900  | -4.66600600                 |
| C                      | 4.26483200  | 0.37407400  | 1.64935200                  |
| C                      | 3.49374400  | 1.28909200  | 2.62102900                  |
| C                      | 5.72470400  | 0.18273400  | 2.10522600                  |
| H                      | 3.78483500  | -0.60859000 | 1.68417100                  |
| H                      | 2.44389000  | 1.38586300  | 2.32481000                  |
| H                      | 3.52503600  | 0.87892600  | 3.63565500                  |
| H                      | 3.92828000  | 2.29353300  | 2.65488500                  |
| H                      | 6.26871300  | -0.49146300 | 1.43630000                  |
| H                      | 6.26640300  | 1.13344300  | 2.13093000                  |
| H                      | 5.75444800  | -0.24235600 | 3.11346800                  |
| C                      | -0.29963200 | -3.57078700 | -2.04103000                 |
| C                      | -1.39142900 | -2.71257200 | -2.70991400                 |
| C                      | -0.14521100 | -4.92838600 | -2.75505200                 |
| H                      | 0.64692100  | -3.03439100 | -2.15784300                 |
| H                      | -1.47979500 | -1.73350400 | -2.22777000                 |
| H                      | -1.15334700 | -2.55222500 | -3.76651900                 |
| H                      | -2.37038100 | -3.20037500 | -2.66153200                 |
| H                      | 0.65301100  | -5.52886900 | -2.30745000                 |
| H                      | -1.06836800 | -5.51469700 | -2.70625600                 |
| H                      | 0.09588300  | -4.77687100 | -3.81204200                 |
| C                      | 1.00102900  | -2.95461400 | 2.91836400                  |
| C                      | 1.60297000  | -4.12777100 | 3.71741500                  |
| C                      | 0.30977100  | -1.94198600 | 3.85221100                  |
| H                      | 1.83193700  | -2.43138200 | 2.43530400                  |
| H                      | 2.12951700  | -4.83107500 | 3.06438700                  |
| H                      | 2.31577900  | -3.75648200 | 4.46067100                  |
| H                      | 0.82818000  | -4.68739200 | 4.25118000                  |
| H                      | -0.10333700 | -1.09631500 | 3.29330300                  |
| H                      | -0.50975000 | -2.40432400 | 4.41154200                  |
| H                      | 1.02622100  | -1.55111200 | 4.58210100                  |
| O                      | -1.99776400 | 1.42232800  | 2.45119700                  |
| Zero-point correction= |             |             | 0.789081 (Hartree/Particle) |

|                                              |              |
|----------------------------------------------|--------------|
| Thermal correction to Energy=                | 0.839411     |
| Thermal correction to Enthalpy=              | 0.840355     |
| Thermal correction to Gibbs Free Energy=     | 0.694667     |
| Sum of electronic and zero-point Energies=   | -2098.789801 |
| Sum of electronic and thermal Energies=      | -2098.739472 |
| Sum of electronic and thermal Enthalpies=    | -2098.738527 |
| Sum of electronic and thermal Free Energies= | -2098.884215 |

## 2-TS1

|    |             |             |             |
|----|-------------|-------------|-------------|
| C  | -0.12247300 | 2.33109400  | 0.48751200  |
| O  | -0.64342600 | 2.70411000  | -0.56079000 |
| C  | 0.32141800  | 3.28096900  | 1.53354700  |
| C  | 0.13659400  | 4.65534000  | 1.30569700  |
| C  | 0.89461400  | 2.84518900  | 2.73883200  |
| C  | 0.52524700  | 5.57891700  | 2.27000400  |
| H  | -0.31188300 | 4.97257600  | 0.37059000  |
| C  | 1.27972400  | 3.77420100  | 3.70343400  |
| C  | 1.09650800  | 5.13955200  | 3.46920600  |
| H  | 0.38337100  | 6.64049200  | 2.09247100  |
| H  | 1.71893600  | 3.43602700  | 4.63681500  |
| C  | 0.12647100  | 0.86713700  | 0.69960100  |
| C  | -0.68758000 | -0.04889700 | 1.08806700  |
| C  | -1.12435200 | -1.28439500 | 1.41111800  |
| C  | -1.57733500 | -2.38201300 | 1.71970400  |
| C  | -2.09124700 | -3.65688000 | 2.05381500  |
| C  | -2.80558600 | -4.40556500 | 1.09139700  |
| C  | -1.90394600 | -4.18542600 | 3.35063800  |
| C  | -3.31869300 | -5.65345800 | 1.42570100  |
| C  | -2.42188500 | -5.43500100 | 3.67107500  |
| H  | -1.35672600 | -3.60613500 | 4.08689300  |
| C  | -3.12840200 | -6.16847300 | 2.71220200  |
| H  | -3.86971700 | -6.22606900 | 0.68646500  |
| H  | -2.27903500 | -5.83899500 | 4.66826100  |
| H  | -3.53300800 | -7.14283900 | 2.96869500  |
| H  | 1.39683300  | 5.86230300  | 4.22216100  |
| H  | 1.03221500  | 1.78381500  | 2.91900300  |
| H  | -2.94935900 | -3.99352900 | 0.09809300  |
| Au | 2.00577900  | 0.17790500  | 0.07611200  |
| C  | 3.82417900  | -0.40231800 | -0.62798500 |
| C  | 5.61668200  | -1.63809800 | -1.23002400 |
| C  | 5.83002400  | -0.36970300 | -1.66546600 |
| H  | 6.65471300  | 0.06977100  | -2.20284600 |
| H  | 6.21835500  | -2.52906100 | -1.30953500 |

|   |            |             |             |
|---|------------|-------------|-------------|
| N | 4.38127600 | -1.64199600 | -0.59511800 |
| N | 4.72186400 | 0.37659100  | -1.28767200 |
| C | 3.78722400 | -2.81611900 | 0.01141500  |
| C | 4.08636800 | -3.09878500 | 1.35921600  |
| C | 2.96421600 | -3.63966100 | -0.78236700 |
| C | 3.52243700 | -4.25601400 | 1.91045200  |
| C | 2.42965200 | -4.78324700 | -0.17604600 |
| C | 2.70414800 | -5.08988800 | 1.15366500  |
| H | 3.73235400 | -4.50883700 | 2.94512100  |
| H | 1.79362800 | -5.44413700 | -0.75647000 |
| H | 2.28265900 | -5.98544800 | 1.60065600  |
| C | 4.56785600 | 1.79207300  | -1.56105200 |
| C | 3.89354300 | 2.18271100  | -2.73522800 |
| C | 5.13014200 | 2.71295400  | -0.65393700 |
| C | 3.79098600 | 3.55675400  | -2.98562200 |
| C | 4.99808100 | 4.07281500  | -0.95989600 |
| C | 4.33705600 | 4.49188600  | -2.11122000 |
| H | 3.27861100 | 3.89657400  | -3.88015400 |
| H | 5.42076300 | 4.81263900  | -0.28752000 |
| H | 4.24911900 | 5.55214300  | -2.32900900 |
| C | 3.29693200 | 1.18707500  | -3.72510000 |
| C | 4.02709000 | 1.24222900  | -5.08184300 |
| C | 1.78062800 | 1.39970500  | -3.89979500 |
| H | 3.43651300 | 0.17927800  | -3.32278900 |
| H | 5.09903100 | 1.05083000  | -4.96918800 |
| H | 3.61828500 | 0.49082900  | -5.76520600 |
| H | 3.91307700 | 2.22136400  | -5.55836800 |
| H | 1.25618000 | 1.34649300  | -2.94038300 |
| H | 1.55971100 | 2.37434300  | -4.34691000 |
| H | 1.36555400 | 0.63198700  | -4.56116600 |
| C | 5.87212000 | 2.28832000  | 0.60996700  |
| C | 5.24655200 | 2.90415500  | 1.87618300  |
| C | 7.37364400 | 2.62656100  | 0.51473900  |
| H | 5.78830200 | 1.20171600  | 0.70687800  |
| H | 4.18324800 | 2.65907100  | 1.95760600  |
| H | 5.75549900 | 2.52615500  | 2.76906100  |
| H | 5.33935600 | 3.99491300  | 1.88305100  |
| H | 7.83906900 | 2.15312900  | -0.35576900 |
| H | 7.53323000 | 3.70628200  | 0.42908800  |
| H | 7.90075400 | 2.28148400  | 1.41012600  |
| C | 2.65326400 | -3.34331700 | -2.24638500 |
| C | 1.13984100 | -3.17476700 | -2.48219100 |
| C | 3.24380200 | -4.42380000 | -3.17408500 |
| H | 3.12684700 | -2.39351600 | -2.51162100 |

|   |              |             |             |
|---|--------------|-------------|-------------|
| H | 0.72342500   | -2.38727400 | -1.84612700 |
| H | 0.94756200   | -2.90769600 | -3.52644600 |
| H | 0.59458400   | -4.10104300 | -2.27272900 |
| H | 4.32532500   | -4.52284200 | -3.03749800 |
| H | 2.79434700   | -5.40396000 | -2.98436500 |
| H | 3.05638800   | -4.16952400 | -4.22231700 |
| C | 4.98812200   | -2.21431100 | 2.21472000  |
| C | 6.26176500   | -2.96450000 | 2.65208000  |
| C | 4.23230800   | -1.64510200 | 3.43090500  |
| H | 5.30692900   | -1.36185500 | 1.60782700  |
| H | 6.82222100   | -3.33988300 | 1.79004100  |
| H | 6.91949000   | -2.29856900 | 3.21991600  |
| H | 6.02462100   | -3.82076900 | 3.29172800  |
| H | 3.34388700   | -1.08729800 | 3.11811700  |
| H | 3.90936100   | -2.43945100 | 4.11181200  |
| H | 4.88050000   | -0.96812100 | 3.99694200  |
| C | -5.99515200  | 1.00329700  | 1.72697100  |
| C | -4.79281000  | 1.44673400  | 2.12878300  |
| H | -6.07848000  | -0.04671500 | 1.44419200  |
| H | -4.64140800  | 2.48290800  | 2.42342800  |
| C | -7.24905800  | 1.76363200  | 1.63174900  |
| C | -8.42489900  | 1.08172900  | 1.26934600  |
| C | -7.33561400  | 3.14529200  | 1.88862900  |
| C | -9.64462000  | 1.75070200  | 1.17028300  |
| H | -8.37783400  | 0.01485100  | 1.06648900  |
| C | -8.55194900  | 3.81346500  | 1.78734300  |
| H | -6.44682100  | 3.70264100  | 2.16836200  |
| C | -9.71251700  | 3.12020600  | 1.42879800  |
| H | -10.54074600 | 1.20200700  | 0.89559800  |
| H | -8.59785000  | 4.87960900  | 1.98933800  |
| H | -10.66002400 | 3.64505600  | 1.35334100  |
| C | -3.57991900  | 0.57079000  | 2.21193100  |
| H | -3.82792700  | -0.46680500 | 1.95078300  |
| H | -3.15747500  | 0.57451400  | 3.22293800  |
| O | -2.53341500  | 1.07103000  | 1.36108000  |
| H | -2.82731900  | 1.03892000  | 0.40775400  |
| C | -6.07219700  | 0.52549600  | -2.28766700 |
| C | -4.75071700  | 0.54181700  | -2.51811800 |
| H | -6.49406500  | 1.33753800  | -1.69471200 |
| H | -4.26698000  | -0.24667800 | -3.09172800 |
| C | -7.05152400  | -0.46997300 | -2.74908900 |
| C | -8.39800100  | -0.31657000 | -2.37350800 |
| C | -6.71056900  | -1.57331900 | -3.55431700 |
| C | -9.36887600  | -1.23104900 | -2.78066000 |

|                                              |              |             |                             |
|----------------------------------------------|--------------|-------------|-----------------------------|
| H                                            | -8.68089600  | 0.53116200  | -1.75487100                 |
| C                                            | -7.67881700  | -2.48692000 | -3.95964800                 |
| H                                            | -5.68201400  | -1.71441600 | -3.87241100                 |
| C                                            | -9.01322500  | -2.32136300 | -3.57497200                 |
| H                                            | -10.40326900 | -1.08960500 | -2.48082800                 |
| H                                            | -7.39515600  | -3.32951200 | -4.58396600                 |
| H                                            | -9.76688900  | -3.03378200 | -3.89695800                 |
| C                                            | -3.84191600  | 1.63358900  | -2.05041400                 |
| H                                            | -4.39588600  | 2.36774500  | -1.44989100                 |
| H                                            | -3.41305100  | 2.16272900  | -2.91337900                 |
| O                                            | -2.76260600  | 1.06057100  | -1.28387900                 |
| H                                            | -1.98613100  | 1.65337100  | -1.32164900                 |
| Zero-point correction=                       |              |             | 1.122684 (Hartree/Particle) |
| Thermal correction to Energy=                |              |             | 1.192684                    |
| Thermal correction to Enthalpy=              |              |             | 1.193628                    |
| Thermal correction to Gibbs Free Energy=     |              |             | 0.997306                    |
| Sum of electronic and zero-point Energies=   |              |             | -2871.648411                |
| Sum of electronic and thermal Energies=      |              |             | -2871.578411                |
| Sum of electronic and thermal Enthalpies=    |              |             | -2871.577466                |
| Sum of electronic and thermal Free Energies= |              |             | -2871.773789                |

## 2-INT1

|   |             |             |             |
|---|-------------|-------------|-------------|
| C | -0.38555900 | -2.19784400 | -0.96011900 |
| O | -1.24442100 | -2.83081100 | -0.22423200 |
| C | 0.37745100  | -3.05686100 | -1.87549100 |
| C | 0.27462900  | -4.45875600 | -1.77715700 |
| C | 1.14625400  | -2.49121000 | -2.91123000 |
| C | 0.93609000  | -5.27296900 | -2.68981600 |
| H | -0.32407900 | -4.89312400 | -0.98515700 |
| C | 1.79525700  | -3.31138500 | -3.82824800 |
| C | 1.69467700  | -4.70167900 | -3.71680600 |
| H | 0.85840500  | -6.35239900 | -2.60679500 |
| H | 2.37802800  | -2.86980600 | -4.63034700 |
| C | -0.16787800 | -0.77522600 | -0.86429200 |
| C | -1.18399200 | 0.11207000  | -1.06055900 |
| C | -1.06225200 | 1.52511300  | -0.98732000 |
| C | -1.10560000 | 2.74334900  | -1.00481100 |
| C | -1.16390900 | 4.16629100  | -1.03077700 |
| C | -2.30646200 | 4.83645600  | -0.54719800 |
| C | -0.09495500 | 4.91858200  | -1.55845600 |
| C | -2.37308900 | 6.22594200  | -0.58981400 |
| C | -0.17498100 | 6.30787900  | -1.59953400 |
| H | 0.78494600  | 4.40494100  | -1.93024000 |

|    |             |             |             |
|----|-------------|-------------|-------------|
| C  | -1.31013900 | 6.96464800  | -1.11625000 |
| H  | -3.25551400 | 6.73416300  | -0.21344800 |
| H  | 0.64847900  | 6.88202600  | -2.01377900 |
| H  | -1.36704900 | 8.04833200  | -1.15119800 |
| H  | 2.20463600  | -5.34028100 | -4.43201900 |
| H  | 1.21770100  | -1.41232900 | -2.99110600 |
| H  | -3.12908600 | 4.25879100  | -0.13805600 |
| Au | 1.72610000  | -0.28726100 | -0.15554700 |
| C  | 3.56580200  | 0.10517600  | 0.66292700  |
| C  | 5.57283000  | 1.01211300  | 1.19476700  |
| C  | 5.42514000  | -0.11092600 | 1.94099800  |
| H  | 6.07061100  | -0.57083000 | 2.67167300  |
| H  | 6.37283000  | 1.73270300  | 1.14198800  |
| N  | 4.42517000  | 1.13309400  | 0.42000900  |
| N  | 4.19346300  | -0.65619800 | 1.60309200  |
| C  | 4.20457800  | 2.23895900  | -0.48815600 |
| C  | 4.56103800  | 2.08440000  | -1.84300000 |
| C  | 3.70419700  | 3.44511600  | 0.04102500  |
| C  | 4.39681300  | 3.19490700  | -2.67979000 |
| C  | 3.56501000  | 4.52266000  | -0.84317500 |
| C  | 3.90817400  | 4.40207000  | -2.18724100 |
| H  | 4.66770300  | 3.11615500  | -3.72790300 |
| H  | 3.18789600  | 5.46946900  | -0.46994800 |
| H  | 3.80257400  | 5.25405500  | -2.85276500 |
| C  | 3.67151900  | -1.87575300 | 2.18512900  |
| C  | 2.79630200  | -1.77910300 | 3.28550100  |
| C  | 4.09306500  | -3.10819500 | 1.64654600  |
| C  | 2.32486400  | -2.97789500 | 3.83509000  |
| C  | 3.59163600  | -4.27279800 | 2.24084300  |
| C  | 2.71509900  | -4.21100500 | 3.32044900  |
| H  | 1.64987700  | -2.94327400 | 4.68452500  |
| H  | 3.89596300  | -5.24036100 | 1.85383600  |
| H  | 2.34092200  | -5.12735000 | 3.76753000  |
| C  | 2.37578200  | -0.44849000 | 3.90262400  |
| C  | 2.92767300  | -0.30219800 | 5.33515100  |
| C  | 0.84696600  | -0.26139700 | 3.87430300  |
| H  | 2.80799800  | 0.35820600  | 3.30389700  |
| H  | 4.01849700  | -0.39101800 | 5.35638400  |
| H  | 2.65889600  | 0.67554000  | 5.74811000  |
| H  | 2.51933100  | -1.06848400 | 6.00215300  |
| H  | 0.45849200  | -0.32816100 | 2.85332200  |
| H  | 0.33711200  | -1.01676800 | 4.48141800  |
| H  | 0.58034100  | 0.72087800  | 4.27818600  |
| C  | 5.06728800  | -3.21532000 | 0.47660000  |

|   |              |             |             |
|---|--------------|-------------|-------------|
| C | 4.45102500   | -3.97091600 | -0.71579900 |
| C | 6.39537500   | -3.86345700 | 0.91665000  |
| H | 5.29827200   | -2.20391900 | 0.12973700  |
| H | 3.53173300   | -3.48913900 | -1.06088400 |
| H | 5.15854400   | -3.99535900 | -1.55135400 |
| H | 4.21205400   | -5.00770300 | -0.45743500 |
| H | 6.86146000   | -3.30919100 | 1.73759200  |
| H | 6.24348700   | -4.89287500 | 1.25705300  |
| H | 7.10260500   | -3.88984500 | 0.08129600  |
| C | 3.32459700   | 3.61648200  | 1.50922900  |
| C | 1.81845600   | 3.89739200  | 1.67230700  |
| C | 4.17247900   | 4.70936800  | 2.18920400  |
| H | 3.53312500   | 2.67661800  | 2.02814700  |
| H | 1.21578100   | 3.10089100  | 1.22574200  |
| H | 1.56105000   | 3.96806600  | 2.73447200  |
| H | 1.53047700   | 4.84067800  | 1.19765300  |
| H | 5.24350500   | 4.49955200  | 2.10407000  |
| H | 3.99120800   | 5.69420100  | 1.74650200  |
| H | 3.92344700   | 4.77506400  | 3.25323200  |
| C | 5.13975400   | 0.78999800  | -2.40510400 |
| C | 6.62975600   | 0.95859900  | -2.76447100 |
| C | 4.33221700   | 0.27779400  | -3.61234800 |
| H | 5.07319700   | 0.02235200  | -1.62919500 |
| H | 7.21815500   | 1.27515400  | -1.89741500 |
| H | 7.04522600   | 0.01308200  | -3.12820300 |
| H | 6.76716100   | 1.70830000  | -3.55059500 |
| H | 3.27531300   | 0.15873300  | -3.35435500 |
| H | 4.39598800   | 0.96079500  | -4.46565200 |
| H | 4.71921900   | -0.69296000 | -3.93964900 |
| C | -5.76677000  | -0.03506300 | -2.13152100 |
| C | -4.53737200  | -0.43765400 | -2.49255800 |
| H | -5.85579200  | 0.92730100  | -1.62596600 |
| H | -4.37948000  | -1.39031000 | -2.99308600 |
| C | -7.04114100  | -0.73592600 | -2.33841800 |
| C | -8.21524000  | -0.16607500 | -1.81372500 |
| C | -7.14749000  | -1.95289400 | -3.03827500 |
| C | -9.45202300  | -0.79013200 | -1.97440600 |
| H | -8.15303200  | 0.77559600  | -1.27424800 |
| C | -8.38130300  | -2.57613700 | -3.19769100 |
| H | -6.26273000  | -2.41182600 | -3.46883000 |
| C | -9.53902400  | -1.99889100 | -2.66605000 |
| H | -10.34669400 | -0.32940300 | -1.56610800 |
| H | -8.44396200  | -3.51303600 | -3.74328200 |
| H | -10.50045700 | -2.48620700 | -2.79660700 |

|                                              |              |             |                             |
|----------------------------------------------|--------------|-------------|-----------------------------|
| C                                            | -3.31458900  | 0.38280800  | -2.25153800                 |
| H                                            | -3.55897400  | 1.35050000  | -1.80356700                 |
| H                                            | -2.75246900  | 0.55967500  | -3.17702700                 |
| O                                            | -2.45213000  | -0.37305300 | -1.34735100                 |
| H                                            | -3.15463300  | -0.84627300 | 0.45972100                  |
| C                                            | -6.15956100  | -0.97881800 | 2.07550600                  |
| C                                            | -4.87461800  | -1.12694500 | 2.43764300                  |
| H                                            | -6.53174100  | -1.60211900 | 1.26136900                  |
| H                                            | -4.43831400  | -0.52894200 | 3.23484000                  |
| C                                            | -7.15694900  | -0.06601000 | 2.65047700                  |
| C                                            | -8.44463000  | -0.03454400 | 2.08588300                  |
| C                                            | -6.88830000  | 0.78020600  | 3.74303100                  |
| C                                            | -9.42937200  | 0.81508700  | 2.58843300                  |
| H                                            | -8.66952200  | -0.68291500 | 1.24290600                  |
| C                                            | -7.87080900  | 1.62849700  | 4.24387800                  |
| H                                            | -5.90804200  | 0.77097800  | 4.20975800                  |
| C                                            | -9.14575300  | 1.65068400  | 3.66906400                  |
| H                                            | -10.41832500 | 0.82137600  | 2.13956500                  |
| H                                            | -7.64582200  | 2.27204700  | 5.08935500                  |
| H                                            | -9.91103700  | 2.31117200  | 4.06548600                  |
| C                                            | -3.95303400  | -2.10750900 | 1.78808600                  |
| H                                            | -4.48260600  | -2.71648300 | 1.04487200                  |
| H                                            | -3.49642000  | -2.77945500 | 2.52168800                  |
| O                                            | -2.82431100  | -1.43136800 | 1.16640200                  |
| H                                            | -1.83189800  | -2.23401000 | 0.38487500                  |
| Zero-point correction=                       |              |             | 1.125233 (Hartree/Particle) |
| Thermal correction to Energy=                |              |             | 1.194573                    |
| Thermal correction to Enthalpy=              |              |             | 1.195518                    |
| Thermal correction to Gibbs Free Energy=     |              |             | 1.004115                    |
| Sum of electronic and zero-point Energies=   |              |             | -2871.678946                |
| Sum of electronic and thermal Energies=      |              |             | -2871.609605                |
| Sum of electronic and thermal Enthalpies=    |              |             | -2871.608661                |
| Sum of electronic and thermal Free Energies= |              |             | -2871.800064                |

### 3-TS1

|   |             |             |             |
|---|-------------|-------------|-------------|
| C | 1.52933800  | -2.20544800 | 0.47394500  |
| O | 2.56274600  | -2.41369500 | -0.16865900 |
| C | 0.75862100  | -3.32076200 | 1.06726400  |
| C | 1.15591400  | -4.63462600 | 0.75529500  |
| C | -0.29410800 | -3.11168500 | 1.97421900  |
| C | 0.49794600  | -5.71694600 | 1.32737800  |
| H | 1.98058400  | -4.77913200 | 0.06609800  |
| C | -0.94139000 | -4.20010800 | 2.55568400  |



|    |             |             |             |
|----|-------------|-------------|-------------|
| C  | -0.54987300 | -5.50066800 | 2.22978200  |
| H  | 0.80176000  | -6.72902200 | 1.07884400  |
| H  | -1.75209600 | -4.03199900 | 3.25664000  |
| C  | 1.05754700  | -0.79131600 | 0.65137700  |
| C  | 1.79719300  | 0.22857400  | 0.97102200  |
| C  | 1.92777500  | 1.53884000  | 1.31201200  |
| C  | 2.11619100  | 2.70355100  | 1.64211700  |
| C  | 2.31673000  | 4.05169800  | 2.02838000  |
| C  | 2.84461000  | 4.98410400  | 1.10810500  |
| C  | 1.99998600  | 4.46888400  | 3.34001100  |
| C  | 3.04824500  | 6.30331900  | 1.49726100  |
| C  | 2.21044000  | 5.79080900  | 3.71633200  |
| H  | 1.59782500  | 3.74888700  | 4.04493000  |
| C  | 2.73302700  | 6.70738400  | 2.79855000  |
| H  | 3.45574700  | 7.01805800  | 0.78935300  |
| H  | 1.96954400  | 6.10894000  | 4.72564400  |
| H  | 2.89667700  | 7.73795600  | 3.09841200  |
| H  | -1.05682400 | -6.34810600 | 2.68209000  |
| H  | -0.59700800 | -2.10243400 | 2.23238000  |
| H  | 3.08840000  | 4.65906300  | 0.10204100  |
| Au | -0.87253000 | -0.24025200 | 0.02688300  |
| C  | -2.71209900 | 0.24143300  | -0.71176400 |
| C  | -4.33560100 | 1.15554900  | -1.99249400 |
| C  | -4.93581300 | 0.31601400  | -1.11058900 |
| H  | -5.97253000 | 0.06040700  | -0.96247200 |
| H  | -4.74245200 | 1.78236800  | -2.76949700 |
| N  | -2.97260200 | 1.10040500  | -1.73402200 |
| N  | -3.92708400 | -0.23776100 | -0.33269000 |
| C  | -1.98241200 | 1.87706900  | -2.45248100 |
| C  | -1.72656100 | 3.19406700  | -2.02077800 |
| C  | -1.34313900 | 1.29467600  | -3.56506700 |
| C  | -0.78025100 | 3.93149600  | -2.74274100 |
| C  | -0.40633100 | 2.08129900  | -4.24712200 |
| C  | -0.12573900 | 3.38325200  | -3.84238900 |
| H  | -0.55873200 | 4.95070200  | -2.44156100 |
| H  | 0.10512600  | 1.66860100  | -5.11092600 |
| H  | 0.60073300  | 3.97550400  | -4.39105100 |
| C  | -4.17010500 | -1.19715400 | 0.72560100  |
| C  | -4.26889300 | -2.56067600 | 0.38367700  |
| C  | -4.34413300 | -0.71953800 | 2.04025400  |
| C  | -4.54875200 | -3.46099000 | 1.41909400  |
| C  | -4.61605400 | -1.66816900 | 3.03425800  |
| C  | -4.72152600 | -3.02268000 | 2.72916500  |
| H  | -4.63635000 | -4.51889400 | 1.19281600  |

|   |             |             |             |
|---|-------------|-------------|-------------|
| H | -4.75914000 | -1.33854500 | 4.05857600  |
| H | -4.94755400 | -3.73808000 | 3.51466400  |
| C | -4.09762100 | -3.07755600 | -1.04200600 |
| C | -5.40277400 | -3.70459400 | -1.57153500 |
| C | -2.92215300 | -4.06813800 | -1.14848000 |
| H | -3.86164300 | -2.22752400 | -1.68921800 |
| H | -6.23572000 | -2.99531700 | -1.53227400 |
| H | -5.27667900 | -4.02204200 | -2.61156900 |
| H | -5.69012100 | -4.58569800 | -0.98867200 |
| H | -1.98599800 | -3.61378200 | -0.81086500 |
| H | -3.09464800 | -4.96441900 | -0.54409800 |
| H | -2.79324900 | -4.38989500 | -2.18710800 |
| C | -4.26945500 | 0.75970900  | 2.40743400  |
| C | -3.13619900 | 1.03692400  | 3.41394100  |
| C | -5.62277200 | 1.27412200  | 2.93738400  |
| H | -4.03836300 | 1.32672400  | 1.50087900  |
| H | -2.16804800 | 0.71403700  | 3.01773400  |
| H | -3.07585100 | 2.10854300  | 3.63056100  |
| H | -3.30333200 | 0.51678600  | 4.36275500  |
| H | -6.42570300 | 1.11093600  | 2.21167500  |
| H | -5.90751500 | 0.77037800  | 3.86661300  |
| H | -5.56686500 | 2.34748100  | 3.14555900  |
| C | -1.64257600 | -0.11937300 | -4.05368000 |
| C | -0.37872500 | -1.00053100 | -4.06152900 |
| C | -2.31294700 | -0.09742700 | -5.44224300 |
| H | -2.35021700 | -0.57952200 | -3.35762900 |
| H | 0.08357400  | -1.04127000 | -3.07002700 |
| H | -0.63257900 | -2.02201800 | -4.36261300 |
| H | 0.37053300  | -0.62632500 | -4.76659300 |
| H | -3.23358300 | 0.49482100  | -5.43522900 |
| H | -1.64851600 | 0.33051500  | -6.19992100 |
| H | -2.56659200 | -1.11428600 | -5.75871300 |
| C | -2.43275300 | 3.83130100  | -0.82739600 |
| C | -3.25142800 | 5.06709200  | -1.25007600 |
| C | -1.43829300 | 4.17955600  | 0.29673500  |
| H | -3.13819200 | 3.10279200  | -0.41682900 |
| H | -3.98195500 | 4.81792300  | -2.02614000 |
| H | -3.79438900 | 5.47502600  | -0.39142200 |
| H | -2.60876300 | 5.86144400  | -1.64320200 |
| H | -0.88969500 | 3.29285200  | 0.62886200  |
| H | -0.70632400 | 4.92518800  | -0.03069300 |
| H | -1.97088900 | 4.59551900  | 1.15849500  |
| C | 6.74404700  | -0.49751700 | -0.45415800 |
| C | 6.06004400  | -0.27410100 | 0.68133000  |

|                                              |             |             |                             |
|----------------------------------------------|-------------|-------------|-----------------------------|
| H                                            | 6.32191100  | -0.10812500 | -1.38186300                 |
| H                                            | 6.41851500  | -0.63655900 | 1.64157300                  |
| C                                            | 8.02131500  | -1.20138400 | -0.61507300                 |
| C                                            | 8.57592300  | -1.30137000 | -1.90341500                 |
| C                                            | 8.72025700  | -1.78537600 | 0.45871200                  |
| C                                            | 9.78524200  | -1.96028700 | -2.11721400                 |
| H                                            | 8.04911500  | -0.85598800 | -2.74373800                 |
| C                                            | 9.92685600  | -2.44370500 | 0.24562100                  |
| H                                            | 8.31943400  | -1.72572300 | 1.46588400                  |
| C                                            | 10.46507700 | -2.53402100 | -1.04241300                 |
| H                                            | 10.19552700 | -2.02532900 | -3.12046000                 |
| H                                            | 10.45236200 | -2.88858800 | 1.08541900                  |
| H                                            | 11.40774000 | -3.04812500 | -1.20380100                 |
| C                                            | 4.76502900  | 0.47042300  | 0.70826000                  |
| H                                            | 4.52560900  | 0.89190700  | -0.27539600                 |
| H                                            | 4.76982600  | 1.27824400  | 1.44433400                  |
| O                                            | 3.69789200  | -0.42146000 | 1.14069900                  |
| H                                            | 3.61890700  | -1.16218800 | 0.49430500                  |
| Zero-point correction=                       |             |             | 0.954301 (Hartree/Particle) |
| Thermal correction to Energy=                |             |             | 1.013216                    |
| Thermal correction to Enthalpy=              |             |             | 1.014160                    |
| Thermal correction to Gibbs Free Energy=     |             |             | 0.847083                    |
| Sum of electronic and zero-point Energies=   |             |             | -2447.609871                |
| Sum of electronic and thermal Energies=      |             |             | -2447.550956                |
| Sum of electronic and thermal Enthalpies=    |             |             | -2447.550012                |
| Sum of electronic and thermal Free Energies= |             |             | -2447.717089                |

#### 1-TS1'

|   |             |             |             |
|---|-------------|-------------|-------------|
| C | -2.35818900 | 3.63241500  | -1.38165300 |
| O | -1.87755400 | 4.14412600  | -2.38664400 |
| C | -3.30020600 | 4.34330100  | -0.47783900 |
| C | -3.72805900 | 5.63047000  | -0.84078200 |
| C | -3.75745100 | 3.76838900  | 0.71745500  |
| C | -4.60733700 | 6.32836100  | -0.01940300 |
| H | -3.36000700 | 6.05719700  | -1.76772800 |
| C | -4.63412700 | 4.47263000  | 1.54095800  |
| C | -5.06075700 | 5.75080400  | 1.17174600  |
| H | -4.94105300 | 7.32194100  | -0.30227900 |
| H | -4.98156200 | 4.02969000  | 2.46942300  |
| C | -1.99149600 | 2.25845700  | -1.05672100 |
| C | -1.62079700 | 1.10452100  | -0.91812800 |
| C | -1.08658900 | -0.16789800 | -0.72091200 |
| C | -1.47566700 | -1.37979600 | -0.85932300 |

|    |             |             |             |
|----|-------------|-------------|-------------|
| C  | -1.41232300 | -2.80034700 | -0.75801600 |
| C  | -1.29837000 | -3.59728600 | -1.91890000 |
| C  | -1.48033100 | -3.41855100 | 0.50932800  |
| C  | -1.23852600 | -4.98110300 | -1.80505700 |
| C  | -1.41095600 | -4.80582000 | 0.61047200  |
| H  | -1.56927600 | -2.80175000 | 1.39782400  |
| C  | -1.29241500 | -5.58601000 | -0.54282100 |
| H  | -1.14696000 | -5.59272100 | -2.69703900 |
| H  | -1.45413800 | -5.27877500 | 1.58638800  |
| H  | -1.24313000 | -6.66756200 | -0.46054100 |
| H  | -5.74519300 | 6.29891000  | 1.81255800  |
| H  | -3.41470200 | 2.77801100  | 1.00373600  |
| H  | -1.26723300 | -3.11521000 | -2.88971300 |
| Au | 0.96796300  | -0.14303400 | -0.13734000 |
| C  | 2.91910700  | 0.14243500  | 0.33944100  |
| C  | 4.84427400  | 0.44475300  | 1.47766000  |
| C  | 5.11088600  | 0.64689100  | 0.16113300  |
| H  | 6.02539500  | 0.90259400  | -0.34905400 |
| H  | 5.47851500  | 0.49010300  | 2.34812700  |
| N  | 3.49347700  | 0.13621100  | 1.57094900  |
| N  | 3.91910100  | 0.45793100  | -0.52465100 |
| C  | 2.80633500  | -0.14003600 | 2.81633000  |
| C  | 2.20120900  | 0.93200900  | 3.50217800  |
| C  | 2.80109200  | -1.46376300 | 3.29988600  |
| C  | 1.55916400  | 0.63525400  | 4.71103300  |
| C  | 2.14765200  | -1.69757700 | 4.51613500  |
| C  | 1.53114000  | -0.66241300 | 5.21375600  |
| H  | 1.08137600  | 1.43461400  | 5.26871500  |
| H  | 2.12639000  | -2.70331900 | 4.92409700  |
| H  | 1.03301900  | -0.86673100 | 6.15694700  |
| C  | 3.77936600  | 0.58553000  | -1.96310200 |
| C  | 4.02548300  | -0.54905500 | -2.76179000 |
| C  | 3.43232900  | 1.84315200  | -2.49713300 |
| C  | 3.91254500  | -0.39134100 | -4.14846000 |
| C  | 3.33442600  | 1.93810600  | -3.89090900 |
| C  | 3.57152000  | 0.83662800  | -4.70826200 |
| H  | 4.09750000  | -1.24167700 | -4.79747800 |
| H  | 3.07010300  | 2.88946100  | -4.34090900 |
| H  | 3.49173500  | 0.93655000  | -5.78662500 |
| C  | 4.40972800  | -1.90773400 | -2.18327200 |
| C  | 5.82949600  | -2.32209700 | -2.61791100 |
| C  | 3.37806800  | -2.99168100 | -2.55108100 |
| H  | 4.41440200  | -1.82715000 | -1.09201600 |
| H  | 6.57334900  | -1.57490900 | -2.32359800 |

|    |             |             |             |
|----|-------------|-------------|-------------|
| H  | 6.10625100  | -3.27601200 | -2.15739300 |
| H  | 5.89556400  | -2.44544000 | -3.70365700 |
| H  | 2.37448200  | -2.71504700 | -2.21237500 |
| H  | 3.33443800  | -3.15478600 | -3.63278200 |
| H  | 3.64692900  | -3.94484100 | -2.08370500 |
| C  | 3.19760400  | 3.07970300  | -1.63426500 |
| C  | 1.84889300  | 3.75810000  | -1.93960000 |
| C  | 4.36454500  | 4.07805400  | -1.78062000 |
| H  | 3.16706400  | 2.76315000  | -0.58704600 |
| H  | 1.01075500  | 3.06393500  | -1.83345300 |
| H  | 1.68753100  | 4.59433800  | -1.25170100 |
| H  | 1.81515700  | 4.16388900  | -2.95519300 |
| H  | 5.32362400  | 3.62119800  | -1.51541700 |
| H  | 4.44458300  | 4.44392300  | -2.80950700 |
| H  | 4.21006600  | 4.94423200  | -1.12906800 |
| C  | 3.48513200  | -2.61694400 | 2.57158200  |
| C  | 2.49837100  | -3.75300000 | 2.24292100  |
| C  | 4.69105100  | -3.14483700 | 3.37465000  |
| H  | 3.86777900  | -2.24061600 | 1.61843200  |
| H  | 1.65148700  | -3.38555900 | 1.65516600  |
| H  | 3.00142500  | -4.53472400 | 1.66447100  |
| H  | 2.10314700  | -4.21948200 | 3.15133800  |
| H  | 5.41944700  | -2.35236200 | 3.57371800  |
| H  | 4.37842600  | -3.55680200 | 4.33974000  |
| H  | 5.19992200  | -3.94093600 | 2.82148700  |
| C  | 2.23572900  | 2.37180700  | 2.99788500  |
| C  | 3.01615100  | 3.28402300  | 3.96550200  |
| C  | 0.81874200  | 2.91933600  | 2.74004200  |
| H  | 2.76548500  | 2.38793600  | 2.04094500  |
| H  | 4.03436400  | 2.91739900  | 4.12950600  |
| H  | 3.08238600  | 4.29875400  | 3.56018200  |
| H  | 2.52497700  | 3.34812700  | 4.94183600  |
| H  | 0.28010200  | 2.30289100  | 2.01323100  |
| H  | 0.22648500  | 2.95216100  | 3.66050000  |
| H  | 0.87376300  | 3.93927200  | 2.34591200  |
| C  | -4.97471200 | -2.66163300 | -1.09679000 |
| C  | -6.13213700 | -2.85977600 | -0.35592200 |
| C  | -6.73929200 | -1.80591400 | 0.32669900  |
| C  | -6.13585400 | -0.55040000 | 0.23278500  |
| C  | -4.97871300 | -0.36305300 | -0.50896700 |
| H  | -7.64474800 | -1.95401300 | 0.90153900  |
| H  | -4.46439500 | -3.43026900 | -1.65845000 |
| H  | -4.46443800 | 0.58038300  | -0.63041200 |
| Cl | -6.82970500 | 0.81604600  | 1.04827500  |

|                                              |             |             |                             |
|----------------------------------------------|-------------|-------------|-----------------------------|
| Cl                                           | -6.81668200 | -4.45375900 | -0.29690100                 |
| N                                            | -4.41847400 | -1.41987500 | -1.16303200                 |
| O                                            | -3.34422000 | -1.23430500 | -1.88043900                 |
| Zero-point correction=                       |             |             | 0.859278 (Hartree/Particle) |
| Thermal correction to Energy=                |             |             | 0.917420                    |
| Thermal correction to Enthalpy=              |             |             | 0.918364                    |
| Thermal correction to Gibbs Free Energy=     |             |             | 0.751915                    |
| Sum of electronic and zero-point Energies=   |             |             | -3266.133769                |
| Sum of electronic and thermal Energies=      |             |             | -3266.075627                |
| Sum of electronic and thermal Enthalpies=    |             |             | -3266.074683                |
| Sum of electronic and thermal Free Energies= |             |             | -3266.241132                |

## 2-TS1'

|    |             |             |             |
|----|-------------|-------------|-------------|
| C  | 2.39777500  | 2.48656400  | -1.41427600 |
| O  | 3.38893300  | 2.50853200  | -0.67549200 |
| C  | 2.21144000  | 3.44625000  | -2.52206900 |
| C  | 3.18699900  | 4.43700500  | -2.72760800 |
| C  | 1.09286900  | 3.37931100  | -3.36820700 |
| C  | 3.03976000  | 5.34997400  | -3.76566500 |
| H  | 4.04536400  | 4.46911900  | -2.06538700 |
| C  | 0.95162800  | 4.29424800  | -4.40877200 |
| C  | 1.92320900  | 5.27911600  | -4.60667000 |
| H  | 3.79220100  | 6.11587100  | -3.92538400 |
| H  | 0.08970400  | 4.24022700  | -5.06646100 |
| C  | 1.38479600  | 1.47470800  | -1.17488700 |
| C  | 0.70146600  | 0.52898800  | -0.82344800 |
| C  | -0.09897300 | -0.52407900 | -0.39765900 |
| C  | 0.03411400  | -1.76220300 | -0.13398300 |
| C  | -0.22894300 | -3.13464500 | 0.08569100  |
| C  | 0.39602500  | -3.83118200 | 1.14525900  |
| C  | -1.12847900 | -3.81368900 | -0.77023800 |
| C  | 0.11343200  | -5.17638800 | 1.34338000  |
| C  | -1.40914700 | -5.15674000 | -0.55038000 |
| H  | -1.60429700 | -3.27299300 | -1.58140700 |
| C  | -0.78832800 | -5.83807600 | 0.50171400  |
| H  | 0.59814100  | -5.71513400 | 2.15107600  |
| H  | -2.10610300 | -5.67422900 | -1.20134500 |
| H  | -1.00274800 | -6.89027200 | 0.66344100  |
| H  | 1.81252900  | 5.99171500  | -5.41869400 |
| H  | 0.34415900  | 2.60889400  | -3.20964700 |
| H  | 1.11677600  | -3.31106500 | 1.76313400  |
| Au | -2.16294400 | -0.14398200 | 0.04881000  |
| C  | -4.08453400 | 0.39721400  | 0.40715200  |

|   |             |             |             |
|---|-------------|-------------|-------------|
| C | -6.34085600 | 0.44165100  | 0.43558800  |
| C | -5.90115800 | 1.56005400  | 1.06851400  |
| H | -6.43612300 | 2.37356900  | 1.53129200  |
| H | -7.33698100 | 0.08157100  | 0.23492400  |
| N | -5.21296800 | -0.26260600 | 0.03510300  |
| N | -4.51381200 | 1.51808000  | 1.04278000  |
| C | -5.25313800 | -1.52930800 | -0.66794700 |
| C | -5.24584300 | -1.51762100 | -2.07730600 |
| C | -5.32595800 | -2.71405300 | 0.09176000  |
| C | -5.30566500 | -2.75723600 | -2.72662000 |
| C | -5.38640800 | -3.92253200 | -0.61360000 |
| C | -5.37611600 | -3.94642700 | -2.00566100 |
| H | -5.30667200 | -2.78938000 | -3.81163700 |
| H | -5.44935800 | -4.85561400 | -0.06252700 |
| H | -5.43332500 | -4.89489700 | -2.53190000 |
| C | -3.65910200 | 2.53649200  | 1.62227200  |
| C | -3.26217800 | 2.39391000  | 2.96672500  |
| C | -3.28555100 | 3.63367100  | 0.82056400  |
| C | -2.45058400 | 3.40164000  | 3.50223000  |
| C | -2.47464900 | 4.60972100  | 1.41245200  |
| C | -2.05984800 | 4.49640900  | 2.73645300  |
| H | -2.12303100 | 3.32760300  | 4.53435700  |
| H | -2.16595000 | 5.47076800  | 0.82802600  |
| H | -1.43239300 | 5.26678500  | 3.17460100  |
| C | -3.67667500 | 1.21299300  | 3.83931200  |
| C | -4.52542800 | 1.67150700  | 5.04164100  |
| C | -2.45244100 | 0.39795500  | 4.30058400  |
| H | -4.30107000 | 0.54440200  | 3.23873900  |
| H | -5.41627900 | 2.21922900  | 4.71834300  |
| H | -4.85269400 | 0.80664500  | 5.62768500  |
| H | -3.95635500 | 2.32708200  | 5.70842900  |
| H | -1.86608200 | 0.04452600  | 3.44617400  |
| H | -1.79040900 | 0.99355000  | 4.93724100  |
| H | -2.77334200 | -0.47363900 | 4.88037500  |
| C | -3.72803000 | 3.79430600  | -0.63075100 |
| C | -2.52062300 | 3.83289300  | -1.58746200 |
| C | -4.62115600 | 5.03775900  | -0.81196500 |
| H | -4.32790900 | 2.92140400  | -0.90547600 |
| H | -1.90180200 | 2.93625000  | -1.48015100 |
| H | -2.86280200 | 3.89320000  | -2.62598800 |
| H | -1.88439800 | 4.70303700  | -1.39757400 |
| H | -5.50106100 | 4.99863100  | -0.16202500 |
| H | -4.07759100 | 5.95891700  | -0.57879600 |
| H | -4.96819300 | 5.11005900  | -1.84779400 |

|   |             |             |             |
|---|-------------|-------------|-------------|
| C | -5.35062800 | -2.72567800 | 1.61765000  |
| C | -4.14499500 | -3.48908900 | 2.19892300  |
| C | -6.67928600 | -3.29577400 | 2.15305800  |
| H | -5.27601800 | -1.69239400 | 1.96918300  |
| H | -3.19860400 | -3.06826100 | 1.84579800  |
| H | -4.15636000 | -3.43629100 | 3.29244300  |
| H | -4.16574300 | -4.54734200 | 1.91944300  |
| H | -7.53946900 | -2.73414800 | 1.77528000  |
| H | -6.81310700 | -4.34264900 | 1.86189600  |
| H | -6.69875000 | -3.25064400 | 3.24659200  |
| C | -5.19143500 | -0.23407300 | -2.90047400 |
| C | -6.46902000 | -0.05493100 | -3.74468900 |
| C | -3.92956200 | -0.18060300 | -3.78365800 |
| H | -5.13706100 | 0.61369600  | -2.21120700 |
| H | -7.36689500 | -0.05518800 | -3.11875900 |
| H | -6.43503100 | 0.89452100  | -4.28846900 |
| H | -6.57851000 | -0.85602900 | -4.48272500 |
| H | -3.01939400 | -0.26231700 | -3.18018600 |
| H | -3.91949400 | -0.98952100 | -4.52133800 |
| H | -3.89137200 | 0.76635600  | -4.33190500 |
| C | 5.39569400  | -3.26926100 | -1.36085900 |
| C | 4.59307200  | -2.21700100 | -1.14115500 |
| H | 4.93060400  | -4.22001300 | -1.62524700 |
| H | 5.00446600  | -1.25494000 | -0.84184800 |
| C | 6.86349600  | -3.30142400 | -1.27901900 |
| C | 7.65099500  | -2.13837200 | -1.18147800 |
| C | 7.51949800  | -4.54448600 | -1.30522000 |
| C | 9.03818900  | -2.22150400 | -1.09641300 |
| H | 7.17807300  | -1.16105300 | -1.19308200 |
| C | 8.90842900  | -4.62896700 | -1.21813500 |
| H | 6.92897700  | -5.45345000 | -1.38972000 |
| C | 9.67383500  | -3.46721400 | -1.11140900 |
| H | 9.62520700  | -1.31015800 | -1.02840100 |
| H | 9.39229000  | -5.60111600 | -1.23727500 |
| H | 10.75626900 | -3.52917900 | -1.05028100 |
| C | 3.10092700  | -2.25925500 | -1.28538500 |
| H | 2.77284800  | -3.24895800 | -1.61898600 |
| H | 2.77669500  | -1.52733500 | -2.04267400 |
| O | 2.42190100  | -1.99929000 | -0.04504600 |
| H | 2.79122500  | -1.16982100 | 0.34682800  |
| C | 6.51275100  | 1.44899300  | 2.31652300  |
| C | 5.73049200  | 0.41513800  | 1.96916200  |
| H | 6.03548800  | 2.30533600  | 2.79571700  |
| H | 6.14444700  | -0.45682100 | 1.46536100  |



|                                              |             |             |                             |
|----------------------------------------------|-------------|-------------|-----------------------------|
| C                                            | 7.96441300  | 1.58257300  | 2.12712800                  |
| C                                            | 8.78767000  | 0.51419800  | 1.72360900                  |
| C                                            | 8.56776800  | 2.82926500  | 2.36847800                  |
| C                                            | 10.15763000 | 0.69598000  | 1.55656700                  |
| H                                            | 8.35903100  | -0.46826700 | 1.55208300                  |
| C                                            | 9.93945800  | 3.01218400  | 2.19891400                  |
| H                                            | 7.94886300  | 3.66365300  | 2.68940000                  |
| C                                            | 10.74065300 | 1.94538700  | 1.79075400                  |
| H                                            | 10.77689000 | -0.14409500 | 1.25482400                  |
| H                                            | 10.38214300 | 3.98551400  | 2.38947800                  |
| H                                            | 11.81053700 | 2.08153600  | 1.66399000                  |
| C                                            | 4.25670000  | 0.37099700  | 2.24228000                  |
| H                                            | 3.94809600  | 1.25324400  | 2.81981000                  |
| H                                            | 4.00085000  | -0.51615700 | 2.83340500                  |
| O                                            | 3.46723700  | 0.26243300  | 1.04730200                  |
| H                                            | 3.56367800  | 1.07582100  | 0.51199500                  |
| Zero-point correction=                       |             |             | 1.122559 (Hartree/Particle) |
| Thermal correction to Energy=                |             |             | 1.192814                    |
| Thermal correction to Enthalpy=              |             |             | 1.193758                    |
| Thermal correction to Gibbs Free Energy=     |             |             | 0.997993                    |
| Sum of electronic and zero-point Energies=   |             |             | -2871.639453                |
| Sum of electronic and thermal Energies=      |             |             | -2871.569197                |
| Sum of electronic and thermal Enthalpies=    |             |             | -2871.568253                |
| Sum of electronic and thermal Free Energies= |             |             | -2871.764019                |

### 3-TS1'

|   |             |             |             |
|---|-------------|-------------|-------------|
| C | -4.00939000 | 1.84831500  | 0.57941300  |
| O | -4.99954600 | 1.27633700  | 1.03146800  |
| C | -3.94638300 | 3.31281500  | 0.36894900  |
| C | -5.06584800 | 4.08826900  | 0.71595600  |
| C | -2.80752500 | 3.93114300  | -0.17058300 |
| C | -5.04361600 | 5.46516900  | 0.52523200  |
| H | -5.93513900 | 3.58990800  | 1.13111000  |
| C | -2.79206700 | 5.31087900  | -0.36295400 |
| C | -3.90723900 | 6.07758400  | -0.01555900 |
| H | -5.90778000 | 6.06461300  | 0.79399000  |
| H | -1.91371200 | 5.78729300  | -0.78712500 |
| C | -2.84136700 | 1.04176100  | 0.23458000  |
| C | -1.98026000 | 0.21328400  | -0.00374800 |
| C | -0.98151500 | -0.73262100 | -0.26607800 |
| C | -1.05989100 | -1.96980700 | -0.61705200 |
| C | -0.57889200 | -3.28499700 | -0.87024300 |
| C | -0.79133600 | -3.90703100 | -2.12006900 |

|    |             |             |             |
|----|-------------|-------------|-------------|
| C  | 0.11583600  | -3.97401400 | 0.14851900  |
| C  | -0.30584100 | -5.18910000 | -2.34331900 |
| C  | 0.60681500  | -5.25270900 | -0.09371600 |
| H  | 0.27547900  | -3.49142200 | 1.10676400  |
| C  | 0.39383400  | -5.86119100 | -1.33393500 |
| H  | -0.47182100 | -5.66930900 | -3.30224100 |
| H  | 1.14940500  | -5.77618100 | 0.68645700  |
| H  | 0.76911600  | -6.86394200 | -1.51496200 |
| H  | -3.89340900 | 7.15299400  | -0.16670700 |
| H  | -1.94236700 | 3.33238000  | -0.43902800 |
| H  | -1.34984000 | -3.38169200 | -2.88610700 |
| Au | 1.05188700  | -0.15806300 | -0.09016600 |
| C  | 2.95641500  | 0.51538100  | 0.13454300  |
| C  | 5.15276500  | 0.64220400  | 0.64547700  |
| C  | 4.78171900  | 1.84500400  | 0.13608500  |
| H  | 5.34230600  | 2.74979700  | -0.03491300 |
| H  | 6.10271800  | 0.28442100  | 1.00844400  |
| N  | 4.02115000  | -0.16305600 | 0.63811000  |
| N  | 3.43077600  | 1.75160100  | -0.17180000 |
| C  | 3.99839900  | -1.53285900 | 1.11117100  |
| C  | 3.67844900  | -1.77035700 | 2.46322100  |
| C  | 4.32651300  | -2.56102800 | 0.20504000  |
| C  | 3.68579200  | -3.10234000 | 2.89652100  |
| C  | 4.31942100  | -3.87230100 | 0.69723200  |
| C  | 4.00362300  | -4.14191100 | 2.02627400  |
| H  | 3.45011800  | -3.32526500 | 3.93237400  |
| H  | 4.57132800  | -4.69076200 | 0.03013700  |
| H  | 4.01596500  | -5.16573500 | 2.38908800  |
| C  | 2.65264100  | 2.83654700  | -0.73688000 |
| C  | 2.57247100  | 2.94634800  | -2.13984600 |
| C  | 2.03789500  | 3.74933100  | 0.14320900  |
| C  | 1.83617100  | 4.01988400  | -2.65585200 |
| C  | 1.31881900  | 4.80499800  | -0.43207400 |
| C  | 1.21844700  | 4.94074300  | -1.81413500 |
| H  | 1.75269000  | 4.13915900  | -3.73140700 |
| H  | 0.83916300  | 5.53379800  | 0.21392700  |
| H  | 0.66436000  | 5.77291200  | -2.23883800 |
| C  | 3.24655100  | 1.96470900  | -3.09417100 |
| C  | 4.29341400  | 2.66830600  | -3.98041700 |
| C  | 2.20878200  | 1.21141300  | -3.94936800 |
| H  | 3.77717000  | 1.21633600  | -2.49808800 |
| H  | 5.05215700  | 3.17778200  | -3.37810300 |
| H  | 4.80108500  | 1.93909400  | -4.61987600 |
| H  | 3.83067600  | 3.41511300  | -4.63325600 |

|   |              |             |             |
|---|--------------|-------------|-------------|
| H | 1.49201200   | 0.67399400  | -3.31985900 |
| H | 1.64504600   | 1.89592600  | -4.59128400 |
| H | 2.70822600   | 0.48430400  | -4.59794300 |
| C | 2.13282100   | 3.63960200  | 1.66243500  |
| C | 0.74332400   | 3.45568400  | 2.30311900  |
| C | 2.86948800   | 4.85096500  | 2.26809800  |
| H | 2.71957100   | 2.74891000  | 1.90638100  |
| H | 0.23791400   | 2.56874600  | 1.90802200  |
| H | 0.83881900   | 3.33915000  | 3.38755500  |
| H | 0.09634000   | 4.31941500  | 2.11934400  |
| H | 3.87164500   | 4.96601300  | 1.84305000  |
| H | 2.32404400   | 5.78308600  | 2.08906700  |
| H | 2.97225200   | 4.73024800  | 3.35123100  |
| C | 4.68177800   | -2.30103200 | -1.25605200 |
| C | 3.64196900   | -2.92563000 | -2.20686500 |
| C | 6.10494800   | -2.79054900 | -1.58912500 |
| H | 4.66468300   | -1.22036400 | -1.42548700 |
| H | 2.63781700   | -2.53841100 | -2.00720600 |
| H | 3.89554500   | -2.69840600 | -3.24754900 |
| H | 3.60808700   | -4.01507600 | -2.10354500 |
| H | 6.85181000   | -2.32935800 | -0.93537600 |
| H | 6.19416000   | -3.87621700 | -1.48077800 |
| H | 6.35924800   | -2.54009300 | -2.62392800 |
| C | 3.34676600   | -0.65466000 | 3.44996200  |
| C | 4.37959100   | -0.58941600 | 4.59265100  |
| C | 1.91444400   | -0.79363400 | 4.00135600  |
| H | 3.39417400   | 0.29918000  | 2.91629300  |
| H | 5.39559100   | -0.45572900 | 4.20808800  |
| H | 4.15538600   | 0.25004500  | 5.25835500  |
| H | 4.37065000   | -1.50247200 | 5.19655400  |
| H | 1.17625300   | -0.78950400 | 3.19254800  |
| H | 1.78940700   | -1.72116900 | 4.56969000  |
| H | 1.68509300   | 0.03872300  | 4.67451200  |
| C | -6.41089200  | -2.71921600 | -0.08775500 |
| C | -5.22528600  | -2.19410100 | 0.27164500  |
| H | -6.41146400  | -3.72659300 | -0.50705900 |
| H | -5.15699300  | -1.19947500 | 0.71024200  |
| C | -7.73776800  | -2.10617000 | 0.02983400  |
| C | -7.93741200  | -0.78451900 | 0.47619900  |
| C | -8.86321300  | -2.87146500 | -0.32499800 |
| C | -9.22274500  | -0.25924400 | 0.56405800  |
| H | -7.08945700  | -0.16353800 | 0.74775700  |
| C | -10.14950100 | -2.34323800 | -0.23438700 |
| H | -8.72314000  | -3.89191100 | -0.67304500 |

|                                              |              |             |                             |
|----------------------------------------------|--------------|-------------|-----------------------------|
| C                                            | -10.33300000 | -1.03398400 | 0.21168400                  |
| H                                            | -9.36236800  | 0.76109600  | 0.90910900                  |
| H                                            | -11.00527800 | -2.95156400 | -0.51130800                 |
| H                                            | -11.33324300 | -0.61731500 | 0.28383800                  |
| C                                            | -3.93741900  | -2.92522600 | 0.09169900                  |
| H                                            | -4.09447000  | -3.96658900 | -0.19966300                 |
| H                                            | -3.32674600  | -2.90093000 | 1.00219300                  |
| O                                            | -3.13670100  | -2.32238300 | -0.98854400                 |
| H                                            | -3.48184100  | -1.42581100 | -1.12577100                 |
| Zero-point correction=                       |              |             | 0.953370 (Hartree/Particle) |
| Thermal correction to Energy=                |              |             | 1.012906                    |
| Thermal correction to Enthalpy=              |              |             | 1.013850                    |
| Thermal correction to Gibbs Free Energy=     |              |             | 0.845902                    |
| Sum of electronic and zero-point Energies=   |              |             | -2447.598929                |
| Sum of electronic and thermal Energies=      |              |             | -2447.539394                |
| Sum of electronic and thermal Enthalpies=    |              |             | -2447.538450                |
| Sum of electronic and thermal Free Energies= |              |             | -2447.706398                |

#### 4-TS1

|   |             |             |             |
|---|-------------|-------------|-------------|
| C | -1.07112800 | -1.71773100 | -1.60976300 |
| O | -1.73294400 | -2.25811500 | -0.72028100 |
| C | -0.68359900 | -2.40539400 | -2.85478300 |
| C | -1.22623300 | -3.68772900 | -3.06715100 |
| C | 0.19914200  | -1.85215300 | -3.79966000 |
| C | -0.89631200 | -4.40009400 | -4.21331000 |
| H | -1.90176200 | -4.10055000 | -2.32591200 |
| C | 0.52755900  | -2.57669600 | -4.94338200 |
| C | -0.01881100 | -3.84528800 | -5.15189700 |
| H | -1.31935400 | -5.38579000 | -4.37915500 |
| H | 1.20785100  | -2.15031900 | -5.67365300 |
| C | -0.64954100 | -0.31120900 | -1.28273000 |
| C | -1.35754300 | 0.79733000  | -1.94413400 |
| C | -2.51207200 | 1.49347900  | -1.54277200 |
| C | -3.51103400 | 2.17188200  | -1.35581700 |
| C | -4.66022100 | 2.98104100  | -1.17886300 |
| C | -5.56082800 | 2.75171200  | -0.11553600 |
| C | -4.90524100 | 4.03208500  | -2.09127500 |
| C | -6.68142500 | 3.56257700  | 0.02512300  |
| C | -6.02800100 | 4.83609000  | -1.93562700 |
| H | -4.21061500 | 4.20054700  | -2.90741200 |
| C | -6.91533600 | 4.60284800  | -0.87992100 |
| H | -7.37587400 | 3.38380800  | 0.83971700  |
| H | -6.21510600 | 5.64328700  | -2.63645500 |

|    |             |             |             |
|----|-------------|-------------|-------------|
| H  | -7.79259800 | 5.23194200  | -0.76362900 |
| H  | 0.23852900  | -4.40402200 | -6.04686900 |
| H  | 0.61506900  | -0.86436500 | -3.64563100 |
| H  | -5.37899200 | 1.93713200  | 0.57751500  |
| Au | 1.05575100  | 0.00875800  | -0.25687200 |
| C  | 2.81027500  | 0.31927200  | 0.74675800  |
| C  | 4.62665200  | 1.30224700  | 1.65429800  |
| C  | 4.70726600  | -0.02983800 | 1.91688500  |
| H  | 5.44707700  | -0.60698600 | 2.44774000  |
| H  | 5.28280600  | 2.11880900  | 1.90925700  |
| N  | 3.45615400  | 1.49951400  | 0.93796700  |
| N  | 3.58604600  | -0.61790600 | 1.35257400  |
| C  | 2.98751700  | 2.79265900  | 0.47849100  |
| C  | 3.36013600  | 3.22507400  | -0.80975500 |
| C  | 2.19503400  | 3.56482000  | 1.35154300  |
| C  | 2.90346500  | 4.48486200  | -1.21646700 |
| C  | 1.76590800  | 4.81423100  | 0.88694700  |
| C  | 2.11535500  | 5.27096300  | -0.38076100 |
| H  | 3.17074500  | 4.85451700  | -2.20138300 |
| H  | 1.15266100  | 5.43834800  | 1.52926300  |
| H  | 1.77467900  | 6.24541300  | -0.71792100 |
| C  | 3.28103000  | -2.03436200 | 1.41567500  |
| C  | 2.51120700  | -2.50648400 | 2.49777300  |
| C  | 3.78208000  | -2.87421000 | 0.40102600  |
| C  | 2.23322900  | -3.87869800 | 2.53073700  |
| C  | 3.47386800  | -4.23716900 | 0.49106200  |
| C  | 2.70545000  | -4.73477000 | 1.53985900  |
| H  | 1.64328200  | -4.28128800 | 3.34804900  |
| H  | 3.84314200  | -4.91728900 | -0.27001800 |
| H  | 2.47912800  | -5.79570800 | 1.58879500  |
| C  | 2.01165600  | -1.60581100 | 3.62434100  |
| C  | 2.68666100  | -1.97378000 | 4.96149900  |
| C  | 0.47628800  | -1.63308000 | 3.75264700  |
| H  | 2.29547500  | -0.57486900 | 3.39194900  |
| H  | 3.77786800  | -1.92557600 | 4.88827100  |
| H  | 2.36864700  | -1.28486300 | 5.75067800  |
| H  | 2.42059600  | -2.98748500 | 5.27811600  |
| H  | -0.01360800 | -1.29262300 | 2.83524200  |
| H  | 0.10918000  | -2.63868300 | 3.98255000  |
| H  | 0.15981500  | -0.97476400 | 4.56877200  |
| C  | 4.64333100  | -2.36578400 | -0.75140500 |
| C  | 4.01141800  | -2.67942800 | -2.12099700 |
| C  | 6.07738900  | -2.92572900 | -0.66331500 |
| H  | 4.71439800  | -1.27669900 | -0.67266300 |

|   |             |             |             |
|---|-------------|-------------|-------------|
| H | 3.00278500  | -2.26233200 | -2.20129500 |
| H | 4.62255700  | -2.25437800 | -2.92405000 |
| H | 3.94181200  | -3.75774000 | -2.29638700 |
| H | 6.55065500  | -2.67209400 | 0.29054700  |
| H | 6.08596100  | -4.01639500 | -0.75793700 |
| H | 6.69639000  | -2.51674700 | -1.46834500 |
| C | 1.79262000  | 3.09688200  | 2.74735600  |
| C | 0.27055000  | 2.87122100  | 2.84457600  |
| C | 2.28211100  | 4.07137700  | 3.83642600  |
| H | 2.27307700  | 2.13274600  | 2.93983200  |
| H | -0.07046900 | 2.13043800  | 2.11438700  |
| H | 0.00542900  | 2.51078200  | 3.84414500  |
| H | -0.28164700 | 3.80060300  | 2.66943200  |
| H | 3.36557100  | 4.21844900  | 3.78654200  |
| H | 1.80893600  | 5.05382800  | 3.74162500  |
| H | 2.03790700  | 3.68235500  | 4.83005300  |
| C | 4.22797700  | 2.39520900  | -1.75092000 |
| C | 5.58699900  | 3.07766700  | -2.00558700 |
| C | 3.49957500  | 2.09415200  | -3.07534100 |
| H | 4.43328800  | 1.43365600  | -1.27078800 |
| H | 6.12806000  | 3.25576500  | -1.07078700 |
| H | 6.21459400  | 2.44990300  | -2.64629900 |
| H | 5.46235600  | 4.04339900  | -2.50579400 |
| H | 2.53872800  | 1.59957200  | -2.89974900 |
| H | 3.30395000  | 3.00865900  | -3.64439500 |
| H | 4.11396900  | 1.44088900  | -3.70370000 |
| O | -0.71091800 | 1.00012000  | -2.98260800 |
| C | -5.08246800 | -1.07009400 | 2.06095000  |
| C | -4.22328200 | -0.43633300 | 1.24444600  |
| H | -4.84225700 | -1.09276400 | 3.12492300  |
| H | -4.39353700 | -0.40209800 | 0.17000200  |
| C | -6.33116000 | -1.75607000 | 1.70338600  |
| C | -7.03568300 | -2.43944800 | 2.71022200  |
| C | -6.86120200 | -1.76447300 | 0.39902100  |
| C | -8.22195200 | -3.11497100 | 2.42811700  |
| H | -6.64321500 | -2.44067000 | 3.72407800  |
| C | -8.04498300 | -2.43868500 | 0.11655900  |
| H | -6.34843200 | -1.23646600 | -0.39942100 |
| C | -8.73075800 | -3.11767700 | 1.12907500  |
| H | -8.74796400 | -3.63732700 | 3.22160300  |
| H | -8.43861900 | -2.43376400 | -0.89573200 |
| H | -9.65531700 | -3.64108400 | 0.90499500  |
| C | -2.98119700 | 0.24780600  | 1.72869200  |
| H | -2.86710400 | 0.10895300  | 2.81283900  |

|                                              |             |             |                             |
|----------------------------------------------|-------------|-------------|-----------------------------|
| H                                            | -3.01721000 | 1.32739400  | 1.53793900                  |
| O                                            | -1.79681600 | -0.21729500 | 1.05686100                  |
| H                                            | -1.91804100 | -1.15204700 | 0.80988600                  |
| Zero-point correction=                       |             |             | 0.957770 (Hartree/Particle) |
| Thermal correction to Energy=                |             |             | 1.017953                    |
| Thermal correction to Enthalpy=              |             |             | 1.018898                    |
| Thermal correction to Gibbs Free Energy=     |             |             | 0.850186                    |
| Sum of electronic and zero-point Energies=   |             |             | -2522.811924                |
| Sum of electronic and thermal Energies=      |             |             | -2522.751740                |
| Sum of electronic and thermal Enthalpies=    |             |             | -2522.750796                |
| Sum of electronic and thermal Free Energies= |             |             | -2522.919508                |

#### 4-INT1

|    |             |             |             |
|----|-------------|-------------|-------------|
| C  | -1.95780200 | -0.58756800 | -1.61528600 |
| O  | -2.95672200 | -0.98520900 | -0.84325800 |
| C  | -1.73462700 | -1.45923200 | -2.77329300 |
| C  | -2.82365900 | -2.25015800 | -3.20163600 |
| C  | -0.51347400 | -1.54595900 | -3.46920700 |
| C  | -2.70045700 | -3.07594000 | -4.31301500 |
| H  | -3.76548900 | -2.19626800 | -2.66947500 |
| C  | -0.39567500 | -2.38643900 | -4.57101800 |
| C  | -1.48681100 | -3.14596800 | -5.00130400 |
| H  | -3.55075400 | -3.66444000 | -4.64227500 |
| H  | 0.55149000  | -2.44701600 | -5.09705900 |
| C  | -1.29502700 | 0.61879500  | -1.19084200 |
| C  | -0.52949300 | 1.55131600  | -2.10922500 |
| C  | -0.17907500 | 2.82919100  | -1.54167500 |
| C  | 0.16216100  | 3.93720200  | -1.16770200 |
| C  | 0.56224600  | 5.23408800  | -0.74373400 |
| C  | 0.19707700  | 5.71752800  | 0.52992900  |
| C  | 1.32541900  | 6.05220300  | -1.60272400 |
| C  | 0.59012000  | 6.99064000  | 0.93123400  |
| C  | 1.71340700  | 7.32348600  | -1.19071500 |
| H  | 1.59985900  | 5.67947800  | -2.58401800 |
| C  | 1.34782100  | 7.79420800  | 0.07382000  |
| H  | 0.30349200  | 7.36045900  | 1.91086000  |
| H  | 2.29761300  | 7.95081500  | -1.85671900 |
| H  | 1.65002700  | 8.78803500  | 0.38985300  |
| H  | -1.39005200 | -3.79259900 | -5.86824300 |
| H  | 0.33845000  | -0.96502200 | -3.14662300 |
| H  | -0.39390700 | 5.08882200  | 1.18789500  |
| Au | 0.41348700  | -0.42233200 | -0.18456200 |
| C  | 1.97017300  | -1.18654600 | 0.86203700  |

|   |             |             |             |
|---|-------------|-------------|-------------|
| C | 3.98357800  | -1.40541000 | 1.85208200  |
| C | 3.26273800  | -2.52003200 | 2.14024300  |
| H | 3.50674100  | -3.39660900 | 2.71828700  |
| H | 4.98264800  | -1.11113900 | 2.13016400  |
| N | 3.17479900  | -0.59444700 | 1.06784000  |
| N | 2.02746900  | -2.37119800 | 1.52393300  |
| C | 3.56752900  | 0.71353600  | 0.57939500  |
| C | 4.19062000  | 0.80395300  | -0.68102600 |
| C | 3.33347500  | 1.83179800  | 1.40475200  |
| C | 4.58985800  | 2.07719600  | -1.10562800 |
| C | 3.74955400  | 3.07896700  | 0.92337900  |
| C | 4.37260000  | 3.20204100  | -0.31532100 |
| H | 5.07633500  | 2.18700700  | -2.06955700 |
| H | 3.58336100  | 3.96492000  | 1.52786700  |
| H | 4.68885700  | 4.17971200  | -0.66632200 |
| C | 0.95788000  | -3.34732500 | 1.59315000  |
| C | -0.02390000 | -3.19750700 | 2.59318400  |
| C | 0.96490900  | -4.41600800 | 0.67412700  |
| C | -1.04195200 | -4.15798300 | 2.63646600  |
| C | -0.07727000 | -5.34646000 | 0.77005600  |
| C | -1.07229000 | -5.21828600 | 1.73514200  |
| H | -1.81678500 | -4.07747600 | 3.39233500  |
| H | -0.10693000 | -6.18470900 | 0.08131500  |
| H | -1.87007200 | -5.95291800 | 1.79048100  |
| C | -0.00252100 | -2.07295000 | 3.62483000  |
| C | 0.20233000  | -2.63016300 | 5.04810600  |
| C | -1.27030100 | -1.20020700 | 3.54978800  |
| H | 0.84943500  | -1.42211300 | 3.40685000  |
| H | 1.12078700  | -3.22125300 | 5.11901400  |
| H | 0.26905500  | -1.81094300 | 5.77129000  |
| H | -0.63040500 | -3.27332900 | 5.35027300  |
| H | -1.39049900 | -0.75578300 | 2.55642600  |
| H | -2.17201800 | -1.77983000 | 3.77276000  |
| H | -1.21162600 | -0.38677600 | 4.28035000  |
| C | 2.05710500  | -4.60532900 | -0.37455100 |
| C | 1.48175700  | -4.67023900 | -1.80136600 |
| C | 2.91024400  | -5.85189100 | -0.06363400 |
| H | 2.72299600  | -3.73772400 | -0.33784800 |
| H | 0.89745000  | -3.77620300 | -2.03713000 |
| H | 2.29447900  | -4.75028600 | -2.53081900 |
| H | 0.83243500  | -5.54097200 | -1.93765700 |
| H | 3.35698600  | -5.79616000 | 0.93424500  |
| H | 2.30918100  | -6.76601100 | -0.10610600 |
| H | 3.72090300  | -5.95156700 | -0.79264100 |



|                                 |              |             |                             |
|---------------------------------|--------------|-------------|-----------------------------|
| C                               | 2.65522300   | 1.73434300  | 2.76816500                  |
| C                               | 1.30881900   | 2.48472400  | 2.77641800                  |
| C                               | 3.57728000   | 2.23185400  | 3.89841900                  |
| H                               | 2.43874900   | 0.68078300  | 2.96978100                  |
| H                               | 0.63826200   | 2.10832800  | 1.99728000                  |
| H                               | 0.81331300   | 2.36412700  | 3.74569300                  |
| H                               | 1.45076000   | 3.55699800  | 2.60590600                  |
| H                               | 4.52326700   | 1.68160500  | 3.91622100                  |
| H                               | 3.81394000   | 3.29468200  | 3.78641100                  |
| H                               | 3.09103200   | 2.10187200  | 4.87059900                  |
| C                               | 4.44387500   | -0.40631300 | -1.57431000                 |
| C                               | 5.95077300   | -0.71161000 | -1.68921300                 |
| C                               | 3.80627100   | -0.22587400 | -2.96577300                 |
| H                               | 3.96861500   | -1.27777300 | -1.11359900                 |
| H                               | 6.39993200   | -0.89543400 | -0.70795500                 |
| H                               | 6.11427500   | -1.59944100 | -2.30854700                 |
| H                               | 6.49120800   | 0.12110200  | -2.15091200                 |
| H                               | 2.74224400   | 0.01964700  | -2.88969300                 |
| H                               | 4.28934500   | 0.57723900  | -3.53133400                 |
| H                               | 3.91057700   | -1.14588500 | -3.55025700                 |
| O                               | -0.19835500  | 1.25491900  | -3.25138200                 |
| C                               | -5.20549400  | 1.78235600  | 0.64482500                  |
| C                               | -4.37755400  | 1.68804200  | -0.41329100                 |
| H                               | -4.82643800  | 2.29099200  | 1.53265600                  |
| H                               | -4.70527200  | 1.20425800  | -1.33097600                 |
| C                               | -6.58181700  | 1.29060300  | 0.76594400                  |
| C                               | -7.24660900  | 1.45280500  | 1.99471400                  |
| C                               | -7.27254600  | 0.66424600  | -0.28946100                 |
| C                               | -8.55312400  | 1.00083400  | 2.17000500                  |
| H                               | -6.72940300  | 1.93917500  | 2.81800400                  |
| C                               | -8.57675900  | 0.21390500  | -0.11495900                 |
| H                               | -6.79194800  | 0.53561500  | -1.25456000                 |
| C                               | -9.22214700  | 0.37894300  | 1.11529200                  |
| H                               | -9.04849000  | 1.13629400  | 3.12661500                  |
| H                               | -9.09649500  | -0.26363300 | -0.94020000                 |
| H                               | -10.24123600 | 0.02810200  | 1.24651900                  |
| C                               | -2.99252100  | 2.25072400  | -0.39678100                 |
| H                               | -2.87315600  | 2.97813200  | 0.40834600                  |
| H                               | -2.73876800  | 2.73605400  | -1.34232800                 |
| O                               | -1.95956400  | 1.22627100  | -0.10281300                 |
| H                               | -3.06415800  | -0.30782800 | -0.13672300                 |
| Zero-point correction=          |              |             | 0.961089 (Hartree/Particle) |
| Thermal correction to Energy=   |              |             | 1.020662                    |
| Thermal correction to Enthalpy= |              |             | 1.021607                    |

|                                              |              |
|----------------------------------------------|--------------|
| Thermal correction to Gibbs Free Energy=     | 0.854604     |
| Sum of electronic and zero-point Energies=   | -2522.856837 |
| Sum of electronic and thermal Energies=      | -2522.797263 |
| Sum of electronic and thermal Enthalpies=    | -2522.796319 |
| Sum of electronic and thermal Free Energies= | -2522.963322 |

#### 4-TS2

|    |             |             |             |
|----|-------------|-------------|-------------|
| C  | 0.20835600  | 2.22097200  | 0.88032100  |
| O  | 0.89938600  | 1.95038000  | 1.86029800  |
| C  | 0.38100200  | 1.28991000  | -0.26877100 |
| C  | 1.31557400  | 1.66371900  | -1.40271900 |
| Au | -0.47671700 | -0.51695000 | -0.07870100 |
| C  | -1.34147500 | -2.37332200 | 0.09584000  |
| C  | -1.77557200 | -4.57057600 | -0.17149400 |
| C  | -2.70770200 | -4.06787400 | 0.68323200  |
| H  | -3.53452400 | -4.53860600 | 1.19038300  |
| H  | -1.62633200 | -5.56729900 | -0.55461200 |
| N  | -0.94557600 | -3.51736300 | -0.52167600 |
| N  | -2.42606100 | -2.71960000 | 0.83613600  |
| C  | 0.20319700  | -3.62203400 | -1.40038500 |
| C  | 0.02947700  | -3.34396300 | -2.77201900 |
| C  | 1.44063000  | -3.99997000 | -0.84015700 |
| C  | 1.16181800  | -3.44437100 | -3.59092800 |
| C  | 2.53575600  | -4.08200100 | -1.70995800 |
| C  | 2.40076700  | -3.80662000 | -3.06805700 |
| H  | 1.06909500  | -3.24133500 | -4.65297900 |
| H  | 3.50618400  | -4.36856600 | -1.31708500 |
| H  | 3.26334200  | -3.88040000 | -3.72356700 |
| C  | -3.18665800 | -1.80682200 | 1.66914900  |
| C  | -2.77674500 | -1.61779200 | 3.00425100  |
| C  | -4.30584200 | -1.16133800 | 1.10609900  |
| C  | -3.53453100 | -0.73486500 | 3.78364600  |
| C  | -5.02209500 | -0.28901500 | 1.93481100  |
| C  | -4.64269600 | -0.07700600 | 3.25744800  |
| H  | -3.25232700 | -0.56347900 | 4.81752400  |
| H  | -5.88992900 | 0.22859200  | 1.53825600  |
| H  | -5.21586600 | 0.60127300  | 3.88246700  |
| C  | -1.57779500 | -2.33304600 | 3.61974100  |
| C  | -2.02108900 | -3.30171100 | 4.73478300  |
| C  | -0.52168100 | -1.33688300 | 4.13724200  |
| H  | -1.09921300 | -2.93335800 | 2.83998700  |
| H  | -2.74476500 | -4.03607400 | 4.36672400  |
| H  | -1.15795500 | -3.84536900 | 5.13197800  |

|   |             |             |             |
|---|-------------|-------------|-------------|
| H | -2.48704500 | -2.76503600 | 5.56741100  |
| H | -0.18066600 | -0.66095900 | 3.34662200  |
| H | -0.91339800 | -0.72247700 | 4.95414000  |
| H | 0.34871000  | -1.87807700 | 4.52217000  |
| C | -4.75200200 | -1.37175600 | -0.33809200 |
| C | -4.64355000 | -0.06882300 | -1.15467800 |
| C | -6.17643300 | -1.95615600 | -0.41072500 |
| H | -4.08093600 | -2.10052500 | -0.80304300 |
| H | -3.62158200 | 0.32467000  | -1.14274700 |
| H | -4.92857000 | -0.24835700 | -2.19656600 |
| H | -5.30552900 | 0.70793500  | -0.75845900 |
| H | -6.25279300 | -2.89663600 | 0.14385100  |
| H | -6.91653000 | -1.26502000 | 0.00476500  |
| H | -6.45408200 | -2.15188200 | -1.45136300 |
| C | 1.62519700  | -4.31745500 | 0.64128400  |
| C | 2.57957700  | -3.31518000 | 1.31915700  |
| C | 2.10120100  | -5.76855900 | 0.85154000  |
| H | 0.65474300  | -4.22270400 | 1.13773500  |
| H | 2.20797200  | -2.28906200 | 1.22829600  |
| H | 2.67729700  | -3.54470100 | 2.38504000  |
| H | 3.58152400  | -3.35218600 | 0.87958300  |
| H | 1.41331100  | -6.48701500 | 0.39478900  |
| H | 3.09214000  | -5.93552600 | 0.41759400  |
| H | 2.16680200  | -5.99371300 | 1.92063100  |
| C | -1.31888300 | -2.97409600 | -3.38390500 |
| C | -1.84629200 | -4.11268400 | -4.28098000 |
| C | -1.25629600 | -1.64469000 | -4.16074600 |
| H | -2.03829000 | -2.83804900 | -2.57083100 |
| H | -1.94098500 | -5.05133700 | -3.72596300 |
| H | -2.83125400 | -3.85593000 | -4.68382100 |
| H | -1.17565800 | -4.29340000 | -5.12718100 |
| H | -0.87667300 | -0.82911900 | -3.53687600 |
| H | -0.60908000 | -1.71940400 | -5.04028100 |
| H | -2.25529400 | -1.36813700 | -4.51278600 |
| O | 1.31686500  | 0.73583900  | -2.44043500 |
| O | 2.53828400  | 1.71961600  | -0.65395600 |
| H | 1.20022600  | -0.15701700 | -2.07896800 |
| C | 5.78093800  | 0.82990600  | 0.01473100  |
| C | 4.48264000  | 0.82747700  | 0.35931700  |
| H | 6.02698500  | 0.63740100  | -1.03031200 |
| H | 4.15973800  | 1.02956000  | 1.37765300  |
| C | 6.94112100  | 1.05915800  | 0.88342200  |
| C | 6.83186800  | 1.31677400  | 2.26362700  |
| C | 8.22621700  | 1.02427800  | 0.31318300  |

|                                              |             |             |                             |
|----------------------------------------------|-------------|-------------|-----------------------------|
| C                                            | 7.96718600  | 1.53390000  | 3.03734400                  |
| H                                            | 5.85445500  | 1.34943000  | 2.73514500                  |
| C                                            | 9.36405100  | 1.24058500  | 1.08837700                  |
| H                                            | 8.32884300  | 0.82746800  | -0.75110900                 |
| C                                            | 9.23823300  | 1.49651700  | 2.45419600                  |
| H                                            | 7.86371700  | 1.73305200  | 4.09995500                  |
| H                                            | 10.34641100 | 1.21008200  | 0.62669500                  |
| H                                            | 10.12179900 | 1.66601400  | 3.06212800                  |
| C                                            | 3.39157700  | 0.54196000  | -0.61570500                 |
| H                                            | 3.78540000  | 0.34961200  | -1.61858900                 |
| H                                            | 2.79762400  | -0.32577000 | -0.29649500                 |
| C                                            | -0.76226800 | 3.25438500  | 0.79565800                  |
| C                                            | -1.60586200 | 4.13385400  | 0.72244800                  |
| C                                            | -2.57841300 | 5.16146600  | 0.64416000                  |
| C                                            | -3.11882400 | 5.71489900  | 1.82491700                  |
| C                                            | -3.00710700 | 5.63775800  | -0.61370100                 |
| C                                            | -4.07325800 | 6.72255100  | 1.74220700                  |
| H                                            | -2.78081800 | 5.34765200  | 2.78817300                  |
| C                                            | -3.96095900 | 6.64723800  | -0.68096000                 |
| H                                            | -2.57672100 | 5.21557700  | -1.51563700                 |
| C                                            | -4.49502000 | 7.18846200  | 0.49283600                  |
| H                                            | -4.48773800 | 7.14878900  | 2.65021100                  |
| H                                            | -4.28927900 | 7.01602800  | -1.64759000                 |
| H                                            | -5.23903200 | 7.97705700  | 0.43399800                  |
| C                                            | 1.01232100  | 3.03026900  | -1.99101300                 |
| C                                            | 1.66468600  | 4.17607000  | -1.51783600                 |
| C                                            | 0.04526800  | 3.14060500  | -3.00065300                 |
| C                                            | 1.35970300  | 5.42163700  | -2.06493200                 |
| H                                            | 2.41989400  | 4.08345500  | -0.74620800                 |
| C                                            | -0.25985000 | 4.39064800  | -3.53808100                 |
| H                                            | -0.44052900 | 2.24813200  | -3.37909600                 |
| C                                            | 0.39622900  | 5.53271300  | -3.07092200                 |
| H                                            | 1.87902800  | 6.30595200  | -1.70881000                 |
| H                                            | -0.99527300 | 4.47043000  | -4.33320500                 |
| H                                            | 0.16510100  | 6.50488400  | -3.49611100                 |
| Zero-point correction=                       |             |             | 0.958332 (Hartree/Particle) |
| Thermal correction to Energy=                |             |             | 1.017832                    |
| Thermal correction to Enthalpy=              |             |             | 1.018776                    |
| Thermal correction to Gibbs Free Energy=     |             |             | 0.851259                    |
| Sum of electronic and zero-point Energies=   |             |             | -2522.798471                |
| Sum of electronic and thermal Energies=      |             |             | -2522.738971                |
| Sum of electronic and thermal Enthalpies=    |             |             | -2522.738026                |
| Sum of electronic and thermal Free Energies= |             |             | -2522.905544                |

## 4-INT2

|    |             |             |             |
|----|-------------|-------------|-------------|
| C  | -1.97994600 | 0.37766700  | -0.58187700 |
| O  | -2.13771400 | -0.25167800 | -1.63204800 |
| C  | -1.04656000 | -0.43226200 | 0.23193600  |
| C  | -1.64645100 | -1.47972000 | 1.11570400  |
| Au | 0.93865400  | -0.26447800 | -0.13047700 |
| C  | 2.93714100  | -0.14114000 | -0.57489100 |
| C  | 5.19079900  | -0.21420800 | -0.43739500 |
| C  | 4.86887400  | 0.10770800  | -1.71771500 |
| H  | 5.48700200  | 0.30885500  | -2.57781500 |
| H  | 6.14577200  | -0.34634000 | 0.04512000  |
| N  | 3.99458500  | -0.36434200 | 0.25049400  |
| N  | 3.48398600  | 0.14981400  | -1.78449800 |
| C  | 3.90790500  | -0.69316200 | 1.65944900  |
| C  | 3.92709800  | 0.36055600  | 2.59501700  |
| C  | 3.84190300  | -2.05147100 | 2.03135800  |
| C  | 3.87847200  | 0.01297300  | 3.95136600  |
| C  | 3.79304600  | -2.33700700 | 3.40183900  |
| C  | 3.81375600  | -1.31904400 | 4.35232900  |
| H  | 3.90165700  | 0.79751000  | 4.70153700  |
| H  | 3.74795300  | -3.37110000 | 3.72823200  |
| H  | 3.78806000  | -1.56638100 | 5.40964300  |
| C  | 2.73671700  | 0.46401100  | -2.98735400 |
| C  | 2.36081500  | -0.59248500 | -3.84052900 |
| C  | 2.44220700  | 1.81506700  | -3.25936200 |
| C  | 1.65703300  | -0.25487300 | -5.00299200 |
| C  | 1.73770400  | 2.09036400  | -4.43773700 |
| C  | 1.34799700  | 1.06932700  | -5.30007000 |
| H  | 1.34827400  | -1.04108000 | -5.68473600 |
| H  | 1.49301500  | 3.11897200  | -4.68360200 |
| H  | 0.80290900  | 1.30675700  | -6.20867100 |
| C  | 2.68841100  | -2.05437300 | -3.55243100 |
| C  | 3.62854200  | -2.64208700 | -4.62339200 |
| C  | 1.40867600  | -2.90146300 | -3.41065800 |
| H  | 3.21640200  | -2.10541100 | -2.59528800 |
| H  | 4.55580700  | -2.06583800 | -4.70282200 |
| H  | 3.89145100  | -3.67511800 | -4.37389700 |
| H  | 3.15640100  | -2.64921500 | -5.61094700 |
| H  | 0.74826100  | -2.49540600 | -2.63739200 |
| H  | 0.84147000  | -2.93455700 | -4.34626600 |
| H  | 1.66419400  | -3.93198800 | -3.14240100 |
| C  | 2.86115500  | 2.95976200  | -2.34153200 |
| C  | 1.64240800  | 3.75267200  | -1.83139400 |

|   |              |             |             |
|---|--------------|-------------|-------------|
| C | 3.87902700   | 3.88862400  | -3.03259200 |
| H | 3.35610900   | 2.53171800  | -1.46440500 |
| H | 0.92917600   | 3.09968700  | -1.31817400 |
| H | 1.96262400   | 4.52938000  | -1.12906300 |
| H | 1.11244600   | 4.24762700  | -2.65143300 |
| H | 4.76745400   | 3.33856500  | -3.35871300 |
| H | 3.44599600   | 4.37098800  | -3.91470900 |
| H | 4.20221200   | 4.67849000  | -2.34679300 |
| C | 3.84884100   | -3.19158400 | 1.01779900  |
| C | 2.63672700   | -4.12588800 | 1.19514400  |
| C | 5.17176300   | -3.98166700 | 1.08191900  |
| H | 3.77523900   | -2.75740300 | 0.01635800  |
| H | 1.69477600   | -3.57019100 | 1.15863000  |
| H | 2.62532900   | -4.87963100 | 0.40106600  |
| H | 2.67265500   | -4.66010400 | 2.15008300  |
| H | 6.03687300   | -3.33367800 | 0.90892500  |
| H | 5.30334500   | -4.45769400 | 2.05910100  |
| H | 5.18225600   | -4.76999800 | 0.32245000  |
| C | 4.00589400   | 1.83004900  | 2.19197200  |
| C | 5.30631000   | 2.48417500  | 2.69893800  |
| C | 2.76644600   | 2.61223200  | 2.66816800  |
| H | 4.01959200   | 1.88529800  | 1.09948400  |
| H | 6.19128200   | 1.95403300  | 2.33316800  |
| H | 5.36791400   | 3.52237400  | 2.35742500  |
| H | 5.35226600   | 2.49154000  | 3.79270800  |
| H | 1.84335900   | 2.16105800  | 2.29063800  |
| H | 2.70476600   | 2.64015900  | 3.76109100  |
| H | 2.81298500   | 3.64721500  | 2.31393500  |
| O | -0.89065900  | -2.65466500 | 1.22717800  |
| O | -2.97614000  | -1.71081100 | 0.76490500  |
| H | -0.83708800  | -3.04928300 | 0.34332300  |
| C | -5.57567400  | -2.22096100 | -0.05325400 |
| C | -5.10121100  | -2.78811000 | 1.06445700  |
| H | -4.89456200  | -1.61011800 | -0.64143000 |
| H | -5.72840300  | -3.42962400 | 1.68058800  |
| C | -6.93533700  | -2.34229100 | -0.60112000 |
| C | -7.99128200  | -2.98052600 | 0.07610600  |
| C | -7.19998500  | -1.79076200 | -1.86696100 |
| C | -9.25590000  | -3.07048800 | -0.49774300 |
| H | -7.82738200  | -3.40356600 | 1.06282900  |
| C | -8.46630700  | -1.88073300 | -2.44332700 |
| H | -6.39701900  | -1.29172300 | -2.40402300 |
| C | -9.50013000  | -2.52241200 | -1.76093800 |
| H | -10.05694200 | -3.56689500 | 0.04239100  |

|                                              |              |             |                             |
|----------------------------------------------|--------------|-------------|-----------------------------|
| H                                            | -8.64497800  | -1.45037200 | -3.42449700                 |
| H                                            | -10.48840400 | -2.59373700 | -2.20519500                 |
| C                                            | -3.70501700  | -2.63991300 | 1.58686700                  |
| H                                            | -3.72087300  | -2.28180900 | 2.62751100                  |
| H                                            | -3.18250600  | -3.60555100 | 1.59370700                  |
| C                                            | -2.51622800  | 1.64514400  | -0.26254500                 |
| C                                            | -2.98118500  | 2.74397300  | -0.00827200                 |
| C                                            | -3.53073500  | 4.01724300  | 0.28458000                  |
| C                                            | -4.40163600  | 4.63821300  | -0.63627100                 |
| C                                            | -3.21390800  | 4.66713700  | 1.49679500                  |
| C                                            | -4.94277400  | 5.88510900  | -0.34323100                 |
| H                                            | -4.64226100  | 4.13286600  | -1.56556000                 |
| C                                            | -3.76032200  | 5.91461800  | 1.77624200                  |
| H                                            | -2.54490600  | 4.18278000  | 2.20069400                  |
| C                                            | -4.62353200  | 6.52331100  | 0.85931800                  |
| H                                            | -5.61399700  | 6.36137400  | -1.05062100                 |
| H                                            | -3.51642400  | 6.41516200  | 2.70792200                  |
| H                                            | -5.04869900  | 7.49696400  | 1.08299500                  |
| C                                            | -1.47536900  | -0.64363300 | 2.39793300                  |
| C                                            | -2.51018600  | 0.22343700  | 2.79615600                  |
| C                                            | -0.29981300  | -0.73841300 | 3.16741000                  |
| C                                            | -2.38279400  | 0.95804700  | 3.97100600                  |
| H                                            | -3.40954500  | 0.29137100  | 2.19466700                  |
| C                                            | -0.18256900  | 0.00221200  | 4.33974000                  |
| H                                            | 0.49289600   | -1.40740500 | 2.85525400                  |
| C                                            | -1.22021900  | 0.84940900  | 4.74180500                  |
| H                                            | -3.19120000  | 1.60770400  | 4.29150100                  |
| H                                            | 0.71883700   | -0.08232700 | 4.93764100                  |
| H                                            | -1.12494600  | 1.42362000  | 5.65864300                  |
| Zero-point correction=                       |              |             | 0.959348 (Hartree/Particle) |
| Thermal correction to Energy=                |              |             | 1.019353                    |
| Thermal correction to Enthalpy=              |              |             | 1.020298                    |
| Thermal correction to Gibbs Free Energy=     |              |             | 0.852092                    |
| Sum of electronic and zero-point Energies=   |              |             | -2522.809604                |
| Sum of electronic and thermal Energies=      |              |             | -2522.749598                |
| Sum of electronic and thermal Enthalpies=    |              |             | -2522.748654                |
| Sum of electronic and thermal Free Energies= |              |             | -2522.916860                |

#### 4-TS1-1

|   |             |            |             |
|---|-------------|------------|-------------|
| C | 0.00395800  | 2.65660900 | 0.20372900  |
| O | -0.73485900 | 2.46168100 | -0.87394100 |
| C | 0.25823000  | 3.94697300 | 0.85916700  |
| C | 0.22177200  | 4.03761600 | 2.25867600  |

|    |             |             |             |
|----|-------------|-------------|-------------|
| C  | 0.51423700  | 5.08275600  | 0.07511500  |
| C  | 0.44060000  | 5.27156300  | 2.87117300  |
| H  | -0.00612800 | 3.15786800  | 2.85282100  |
| C  | 0.73520700  | 6.30820200  | 0.69653200  |
| C  | 0.69981400  | 6.40155000  | 2.09241100  |
| H  | 0.40176900  | 5.35135700  | 3.95277500  |
| H  | 0.92866900  | 7.19201900  | 0.09697600  |
| C  | -0.88049900 | 1.52442700  | 0.39436000  |
| C  | -2.12477500 | 1.81446300  | 1.21233800  |
| C  | -3.22542500 | 2.44866700  | 0.55807800  |
| C  | -4.16540400 | 2.99643200  | 0.00892600  |
| C  | -5.26465500 | 3.63659000  | -0.62275900 |
| C  | -5.17714500 | 4.02931000  | -1.97470400 |
| C  | -6.45113700 | 3.88510100  | 0.09856000  |
| C  | -6.25706100 | 4.65638600  | -2.58736100 |
| C  | -7.52441100 | 4.51310700  | -0.52492900 |
| H  | -6.51338800 | 3.58246500  | 1.13861000  |
| C  | -7.42972700 | 4.89869000  | -1.86544600 |
| H  | -6.18693000 | 4.95785500  | -3.62786000 |
| H  | -8.43586600 | 4.70366900  | 0.03296600  |
| H  | -8.27005100 | 5.38896900  | -2.34766200 |
| H  | 0.86798300  | 7.36077500  | 2.57263500  |
| H  | 0.53013200  | 4.99840500  | -1.00702500 |
| H  | -4.26175800 | 3.83672200  | -2.52459900 |
| Au | -0.46894600 | -0.49373500 | 0.18023600  |
| C  | -0.23750100 | -2.52489000 | 0.00736900  |
| C  | -0.80217900 | -4.70466600 | -0.20071100 |
| C  | 0.54355600  | -4.64714000 | -0.03102700 |
| H  | 1.29046500  | -5.42326200 | 0.01172800  |
| H  | -1.46744700 | -5.54198500 | -0.33649500 |
| N  | -1.26495100 | -3.39690900 | -0.17507600 |
| N  | 0.87442200  | -3.30278100 | 0.09385000  |
| C  | -2.65889100 | -3.02475900 | -0.32450100 |
| C  | -3.46516500 | -2.96227000 | 0.83021300  |
| C  | -3.14816500 | -2.76846800 | -1.62115300 |
| C  | -4.81262400 | -2.62703500 | 0.64878100  |
| C  | -4.50284300 | -2.43430300 | -1.73769300 |
| C  | -5.32704900 | -2.36553100 | -0.61797600 |
| H  | -5.46689100 | -2.57069300 | 1.51277600  |
| H  | -4.91691900 | -2.22732700 | -2.71948400 |
| H  | -6.37566400 | -2.10787500 | -0.73319100 |
| C  | 2.22994100  | -2.83059100 | 0.27883200  |
| C  | 3.03355500  | -2.64419400 | -0.86425100 |
| C  | 2.70323600  | -2.63102500 | 1.59191600  |



|   |             |             |             |
|---|-------------|-------------|-------------|
| C | 4.35927800  | -2.24036800 | -0.65631100 |
| C | 4.03375900  | -2.21649500 | 1.73631400  |
| C | 4.85578300  | -2.02807400 | 0.62801200  |
| H | 5.01291100  | -2.10512500 | -1.51293600 |
| H | 4.43492400  | -2.05430700 | 2.73173700  |
| H | 5.88872100  | -1.72222100 | 0.76646500  |
| C | 2.52742600  | -2.87787200 | -2.28499800 |
| C | 3.29839600  | -4.01955300 | -2.97700900 |
| C | 2.57857600  | -1.58674100 | -3.12472400 |
| H | 1.47850200  | -3.18197900 | -2.22875200 |
| H | 3.24403700  | -4.94801900 | -2.40007800 |
| H | 2.87992700  | -4.21278200 | -3.96979100 |
| H | 4.35664700  | -3.77065600 | -3.10629600 |
| H | 1.97979600  | -0.79134700 | -2.66841100 |
| H | 3.60307500  | -1.21736800 | -3.23774800 |
| H | 2.18119200  | -1.77024000 | -4.12796600 |
| C | 1.84255000  | -2.85924500 | 2.83124400  |
| C | 1.62242400  | -1.55058900 | 3.61510800  |
| C | 2.43675000  | -3.95621200 | 3.73706600  |
| H | 0.85872700  | -3.20782900 | 2.50458000  |
| H | 1.13411000  | -0.79267300 | 2.99325600  |
| H | 0.98219000  | -1.73226200 | 4.48420400  |
| H | 2.56872300  | -1.13829800 | 3.98141800  |
| H | 2.57306000  | -4.89594100 | 3.19293600  |
| H | 3.40979200  | -3.66248200 | 4.14391300  |
| H | 1.76954900  | -4.14784200 | 4.58322000  |
| C | -2.27701600 | -2.84160800 | -2.87178500 |
| C | -2.18018900 | -1.47123500 | -3.57084800 |
| C | -2.77492000 | -3.92926200 | -3.84386500 |
| H | -1.26316600 | -3.11943200 | -2.56785600 |
| H | -1.79199900 | -0.70537500 | -2.89148300 |
| H | -1.51198300 | -1.53280600 | -4.43624700 |
| H | -3.15778700 | -1.13483200 | -3.93106100 |
| H | -2.81389000 | -4.91115100 | -3.36161500 |
| H | -3.77809000 | -3.70420000 | -4.21987600 |
| H | -2.10666000 | -4.00216900 | -4.70808700 |
| C | -2.93902800 | -3.26200600 | 2.23094400  |
| C | -3.50924500 | -4.59427400 | 2.75925500  |
| C | -3.22066700 | -2.11098900 | 3.21579800  |
| H | -1.85199800 | -3.37372000 | 2.17007600  |
| H | -3.27111900 | -5.42939200 | 2.09242600  |
| H | -3.09607600 | -4.82108000 | 3.74739300  |
| H | -4.59889700 | -4.54783900 | 2.85584400  |
| H | -2.81412100 | -1.15966900 | 2.86018300  |

|                                              |             |             |                             |
|----------------------------------------------|-------------|-------------|-----------------------------|
| H                                            | -4.29417900 | -1.97548500 | 3.38219000                  |
| H                                            | -2.76755500 | -2.33306300 | 4.18759300                  |
| O                                            | -2.12773900 | 1.46404800  | 2.38863100                  |
| C                                            | 4.92981100  | 2.68199000  | -0.02434700                 |
| C                                            | 3.99817600  | 1.72127500  | 0.11693000                  |
| H                                            | 4.69232000  | 3.67426200  | 0.36131800                  |
| H                                            | 4.17279600  | 0.70596500  | -0.22895400                 |
| C                                            | 6.25931100  | 2.56694700  | -0.62976900                 |
| C                                            | 7.09684000  | 3.69670800  | -0.63059800                 |
| C                                            | 6.73950700  | 1.37868700  | -1.21379200                 |
| C                                            | 8.37121700  | 3.64579700  | -1.19237800                 |
| H                                            | 6.74118300  | 4.62198900  | -0.18451400                 |
| C                                            | 8.01109500  | 1.32774000  | -1.77437000                 |
| H                                            | 6.11324900  | 0.49196300  | -1.23227500                 |
| C                                            | 8.83246800  | 2.46045400  | -1.76561400                 |
| H                                            | 9.00223500  | 4.52915500  | -1.18241200                 |
| H                                            | 8.36710800  | 0.40461400  | -2.22211700                 |
| H                                            | 9.82454200  | 2.41639900  | -2.20446100                 |
| C                                            | 2.69124600  | 1.98405500  | 0.77488000                  |
| H                                            | 2.39412000  | 1.20006600  | 1.47790200                  |
| H                                            | 2.66376800  | 2.95458100  | 1.26841500                  |
| O                                            | 1.60887100  | 2.07391900  | -0.25452700                 |
| H                                            | 1.40460100  | 1.17313100  | -0.58128900                 |
| Zero-point correction=                       |             |             | 0.958274 (Hartree/Particle) |
| Thermal correction to Energy=                |             |             | 1.018062                    |
| Thermal correction to Enthalpy=              |             |             | 1.019006                    |
| Thermal correction to Gibbs Free Energy=     |             |             | 0.850353                    |
| Sum of electronic and zero-point Energies=   |             |             | -2522.794103                |
| Sum of electronic and thermal Energies=      |             |             | -2522.734314                |
| Sum of electronic and thermal Enthalpies=    |             |             | -2522.733370                |
| Sum of electronic and thermal Free Energies= |             |             | -2522.902024                |

#### 4-TS1-2

|   |             |             |             |
|---|-------------|-------------|-------------|
| C | 1.22463900  | -2.32131500 | -0.10307200 |
| O | 1.65231300  | -2.41596700 | 1.04571100  |
| C | 0.94705100  | -3.51122900 | -0.94662800 |
| C | 0.35865800  | -3.42373200 | -2.21980000 |
| C | 1.29065800  | -4.77196100 | -0.42761700 |
| C | 0.12085200  | -4.58211100 | -2.95791900 |
| H | 0.08767500  | -2.45888500 | -2.63162000 |
| C | 1.05550500  | -5.92401400 | -1.16968200 |
| C | 0.47034900  | -5.83008400 | -2.43696300 |
| H | -0.33403800 | -4.51129700 | -3.94117000 |

|    |             |             |             |
|----|-------------|-------------|-------------|
| H  | 1.32410900  | -6.89507400 | -0.76499800 |
| C  | 0.88931400  | -0.93332400 | -0.59627200 |
| C  | 1.99317800  | -0.03636800 | -0.90147100 |
| C  | 2.26010100  | 1.34522400  | -0.70664700 |
| C  | 2.49659500  | 2.52678800  | -0.54501500 |
| C  | 2.76317300  | 3.91386700  | -0.36271500 |
| C  | 2.87180100  | 4.76544900  | -1.48036300 |
| C  | 2.92057800  | 4.44231300  | 0.93460600  |
| C  | 3.13141800  | 6.12063400  | -1.29726800 |
| C  | 3.18176700  | 5.79883800  | 1.10449800  |
| H  | 2.83631200  | 3.78441700  | 1.79339100  |
| C  | 3.28685700  | 6.63857100  | -0.00825400 |
| H  | 3.21609500  | 6.77376100  | -2.16013400 |
| H  | 3.30556800  | 6.20253700  | 2.10453700  |
| H  | 3.49217100  | 7.69579200  | 0.12918400  |
| H  | 0.28701900  | -6.72973600 | -3.01723900 |
| H  | 1.73629600  | -4.82051400 | 0.56024700  |
| H  | 2.74973300  | 4.35542700  | -2.47745200 |
| Au | -1.01356500 | -0.26364200 | -0.14119900 |
| C  | -2.90372700 | 0.36513200  | 0.33310600  |
| C  | -4.72626300 | 1.66236800  | 0.67282200  |
| C  | -5.05076000 | 0.39714900  | 1.04385700  |
| H  | -5.96593100 | -0.01780800 | 1.43427500  |
| H  | -5.30047100 | 2.57474900  | 0.67405100  |
| N  | -3.40672400 | 1.62583300  | 0.24050400  |
| N  | -3.92406900 | -0.38563000 | 0.82829800  |
| C  | -2.67661500 | 2.78152800  | -0.23717600 |
| C  | -1.97749400 | 3.56827100  | 0.69967100  |
| C  | -2.71432300 | 3.08014500  | -1.61356700 |
| C  | -1.28890400 | 4.68549800  | 0.21170100  |
| C  | -2.00854800 | 4.21118100  | -2.04274400 |
| C  | -1.30209800 | 5.00458100  | -1.14332300 |
| H  | -0.73568900 | 5.31306000  | 0.90344700  |
| H  | -2.01624700 | 4.47326300  | -3.09620000 |
| H  | -0.76094000 | 5.87656700  | -1.49861400 |
| C  | -3.86727100 | -1.80965000 | 1.09403700  |
| C  | -4.29023400 | -2.69680800 | 0.08411100  |
| C  | -3.41933500 | -2.24269900 | 2.35788000  |
| C  | -4.25501200 | -4.06526700 | 0.37793900  |
| C  | -3.40649900 | -3.62300300 | 2.59331800  |
| C  | -3.81986100 | -4.52534100 | 1.61754700  |
| H  | -4.57342200 | -4.77896100 | -0.37538500 |
| H  | -3.06924600 | -3.99423000 | 3.55585900  |
| H  | -3.80348300 | -5.59134100 | 1.82417900  |

|   |             |             |             |
|---|-------------|-------------|-------------|
| C | -4.76762600 | -2.22992700 | -1.28769500 |
| C | -6.23490900 | -2.62693700 | -1.54276400 |
| C | -3.84709100 | -2.75206400 | -2.40805500 |
| H | -4.71825500 | -1.13736600 | -1.31476400 |
| H | -6.89885200 | -2.22998000 | -0.76825200 |
| H | -6.57214100 | -2.23925500 | -2.50958300 |
| H | -6.35938700 | -3.71451600 | -1.56067500 |
| H | -2.80901800 | -2.44849500 | -2.24049600 |
| H | -3.86978700 | -3.84502600 | -2.46899900 |
| H | -4.16913400 | -2.35871800 | -3.37808300 |
| C | -2.96622000 | -1.28458900 | 3.45505400  |
| C | -1.50811400 | -1.55419200 | 3.87577900  |
| C | -3.91393400 | -1.33639700 | 4.67002700  |
| H | -3.00290200 | -0.26635800 | 3.05672800  |
| H | -0.82840600 | -1.50880200 | 3.01910600  |
| H | -1.18467000 | -0.81025700 | 4.61158800  |
| H | -1.39877100 | -2.54117100 | 4.33697800  |
| H | -4.94506800 | -1.10268000 | 4.38617800  |
| H | -3.91401200 | -2.32794800 | 5.13421800  |
| H | -3.59934600 | -0.61372200 | 5.43003100  |
| C | -3.48056200 | 2.23615600  | -2.62781100 |
| C | -2.53473800 | 1.62096200  | -3.67766000 |
| C | -4.60575300 | 3.04774900  | -3.29953600 |
| H | -3.95294800 | 1.40615100  | -2.09429500 |
| H | -1.75748800 | 1.01307700  | -3.20373900 |
| H | -3.09722700 | 0.98155500  | -4.36596200 |
| H | -2.04006000 | 2.39426800  | -4.27466000 |
| H | -5.30288800 | 3.45525500  | -2.56053100 |
| H | -4.20539800 | 3.88737400  | -3.87699100 |
| H | -5.17356900 | 2.41325400  | -3.98765600 |
| C | -1.94767100 | 3.25269000  | 2.19228600  |
| C | -2.58701500 | 4.38454900  | 3.02039400  |
| C | -0.51563200 | 2.94991600  | 2.67443800  |
| H | -2.54130200 | 2.35021200  | 2.36415100  |
| H | -3.61779900 | 4.57719000  | 2.70664700  |
| H | -2.60013900 | 4.11908700  | 4.08246000  |
| H | -2.02927600 | 5.32122000  | 2.91883200  |
| H | -0.07886300 | 2.11766100  | 2.11313800  |
| H | 0.13780900  | 3.82039400  | 2.55228300  |
| H | -0.52074600 | 2.68327500  | 3.73652200  |
| O | 1.48033000  | -0.57131500 | -2.01278800 |
| C | 6.65643900  | -0.55554900 | 0.54633300  |
| C | 5.51911300  | -1.27939300 | 0.58656800  |
| H | 6.56133000  | 0.53122600  | 0.57769100  |

|                                              |             |             |                             |
|----------------------------------------------|-------------|-------------|-----------------------------|
| H                                            | 5.53303500  | -2.36550400 | 0.56868100                  |
| C                                            | 8.03480600  | -1.04196800 | 0.48175300                  |
| C                                            | 9.07622000  | -0.09724600 | 0.43099800                  |
| C                                            | 8.36819100  | -2.41070600 | 0.46828900                  |
| C                                            | 10.40780500 | -0.50126800 | 0.36556200                  |
| H                                            | 8.83439500  | 0.96255400  | 0.44401800                  |
| C                                            | 9.69734000  | -2.81312400 | 0.40334500                  |
| H                                            | 7.58735200  | -3.16344400 | 0.51360900                  |
| C                                            | 10.72148500 | -1.86093700 | 0.35137000                  |
| H                                            | 11.19794700 | 0.24213900  | 0.32747000                  |
| H                                            | 9.93979900  | -3.87135800 | 0.39543800                  |
| H                                            | 11.75792500 | -2.18052100 | 0.30228300                  |
| C                                            | 4.18712800  | -0.63871500 | 0.68047700                  |
| H                                            | 4.23870500  | 0.43769200  | 0.85818100                  |
| H                                            | 3.49478700  | -1.12087800 | 1.37075700                  |
| O                                            | 3.47365800  | -0.82900900 | -0.64624600                 |
| H                                            | 4.07672100  | -0.56054300 | -1.36544200                 |
| Zero-point correction=                       |             |             | 0.958843 (Hartree/Particle) |
| Thermal correction to Energy=                |             |             | 1.018180                    |
| Thermal correction to Enthalpy=              |             |             | 1.019124                    |
| Thermal correction to Gibbs Free Energy=     |             |             | 0.853511                    |
| Sum of electronic and zero-point Energies=   |             |             | -2522.792338                |
| Sum of electronic and thermal Energies=      |             |             | -2522.733000                |
| Sum of electronic and thermal Enthalpies=    |             |             | -2522.732056                |
| Sum of electronic and thermal Free Energies= |             |             | -2522.897669                |

#### 5-TS1

|   |             |            |             |
|---|-------------|------------|-------------|
| C | -2.46666300 | 2.00392000 | -1.35165900 |
| O | -3.56065300 | 1.95528300 | -0.74640300 |
| C | -2.19498000 | 2.41299600 | -2.70304700 |
| C | -0.89976000 | 2.30185300 | -3.24485100 |
| C | -3.26603800 | 2.91109100 | -3.47588300 |
| C | -0.68795000 | 2.69624000 | -4.56305400 |
| H | -0.08877600 | 1.91519000 | -2.63217500 |
| C | -3.03546800 | 3.30533000 | -4.78543500 |
| C | -1.74664300 | 3.19725500 | -5.32674300 |
| H | 0.30322100  | 2.61514800 | -4.99727300 |
| H | -3.84864300 | 3.69438900 | -5.38938500 |
| C | -1.78549300 | 1.45038800 | -0.19630400 |
| C | -1.42187300 | 2.40701800 | 0.92258100  |
| C | -2.25333400 | 3.53295900 | 1.16755500  |
| C | -2.95376700 | 4.49574300 | 1.43482000  |
| C | -3.76175100 | 5.61738500 | 1.74348000  |

|    |             |             |             |
|----|-------------|-------------|-------------|
| C  | -4.92031500 | 5.88883000  | 0.98376200  |
| C  | -3.41264800 | 6.46744000  | 2.81523600  |
| C  | -5.70902800 | 6.99057700  | 1.29409700  |
| C  | -4.20978300 | 7.56636900  | 3.11459900  |
| H  | -2.52172800 | 6.25298800  | 3.39591000  |
| C  | -5.35544100 | 7.82884000  | 2.35660200  |
| H  | -6.60066400 | 7.19829700  | 0.71115400  |
| H  | -3.94088400 | 8.21991400  | 3.93824600  |
| H  | -5.97493000 | 8.68810600  | 2.59486100  |
| H  | -1.57016700 | 3.50619600  | -6.35293900 |
| H  | -4.25541100 | 2.98095600  | -3.03497000 |
| H  | -5.18501700 | 5.22769500  | 0.16527000  |
| Au | -1.53552000 | -0.55737000 | -0.04394800 |
| C  | -1.32299400 | -2.59142300 | 0.06766500  |
| C  | -1.36581100 | -4.72645700 | 0.80076100  |
| C  | -0.91522200 | -4.74293400 | -0.48078900 |
| H  | -0.61790900 | -5.55844700 | -1.11987700 |
| H  | -1.53782400 | -5.52415700 | 1.50504800  |
| N  | -1.60833000 | -3.39932800 | 1.12431100  |
| N  | -0.89807200 | -3.42619600 | -0.91803800 |
| C  | -2.14774100 | -2.96305000 | 2.39824500  |
| C  | -1.26957300 | -2.84471800 | 3.49416200  |
| C  | -3.53295500 | -2.71343000 | 2.49376500  |
| C  | -1.82153900 | -2.43903500 | 4.71549100  |
| C  | -4.02373200 | -2.30469400 | 3.74005100  |
| C  | -3.18056600 | -2.16577400 | 4.83842300  |
| H  | -1.17686100 | -2.33932900 | 5.58270000  |
| H  | -5.08421300 | -2.10275600 | 3.85230900  |
| H  | -3.58549800 | -1.85203000 | 5.79594600  |
| C  | -0.57864700 | -3.03655000 | -2.27930700 |
| C  | -1.61068700 | -3.09049900 | -3.23825200 |
| C  | 0.74451800  | -2.66101500 | -2.59099600 |
| C  | -1.27918100 | -2.75316800 | -4.55650900 |
| C  | 1.01421900  | -2.34086500 | -3.92745100 |
| C  | 0.01831900  | -2.38715600 | -4.89945000 |
| H  | -2.04806800 | -2.78267000 | -5.32226800 |
| H  | 2.02004300  | -2.05119900 | -4.21003900 |
| H  | 0.25635900  | -2.13770000 | -5.92941800 |
| C  | -3.04616200 | -3.48676500 | -2.90250400 |
| C  | -3.50112000 | -4.71828700 | -3.70964800 |
| C  | -4.01230000 | -2.30233200 | -3.10160900 |
| H  | -3.09018800 | -3.76309100 | -1.84512200 |
| H  | -2.83397600 | -5.57110500 | -3.54957100 |
| H  | -4.51084600 | -5.01682400 | -3.40999100 |

|   |             |             |             |
|---|-------------|-------------|-------------|
| H | -3.52324700 | -4.51175400 | -4.78436900 |
| H | -3.72160800 | -1.44722900 | -2.48264900 |
| H | -4.03061700 | -1.97260500 | -4.14555400 |
| H | -5.03199800 | -2.59179600 | -2.82651700 |
| C | 1.86106800  | -2.62957200 | -1.55053500 |
| C | 2.83362200  | -1.45430500 | -1.75426900 |
| C | 2.62904000  | -3.96874900 | -1.53296700 |
| H | 1.40195900  | -2.49403000 | -0.56589400 |
| H | 2.30541900  | -0.50077400 | -1.84058700 |
| H | 3.51153200  | -1.38289300 | -0.89989000 |
| H | 3.45157900  | -1.58871500 | -2.64866900 |
| H | 1.97229600  | -4.81557200 | -1.30912900 |
| H | 3.10020700  | -4.15966600 | -2.50310600 |
| H | 3.41891700  | -3.94416400 | -0.77534300 |
| C | -4.50417900 | -2.90923800 | 1.33288700  |
| C | -5.28880500 | -1.62306700 | 1.01007600  |
| C | -5.46149900 | -4.08637700 | 1.61094600  |
| H | -3.92669600 | -3.16493600 | 0.44004700  |
| H | -4.61634000 | -0.79006200 | 0.78117200  |
| H | -5.93690100 | -1.78521700 | 0.14254700  |
| H | -5.92787100 | -1.31910400 | 1.84527900  |
| H | -4.91241900 | -5.01409800 | 1.80086100  |
| H | -6.09246200 | -3.88926600 | 2.48359800  |
| H | -6.12156800 | -4.25223400 | 0.75321600  |
| C | 0.21866700  | -3.17137500 | 3.40932900  |
| C | 0.54133400  | -4.46279600 | 4.18918900  |
| C | 1.09534100  | -2.00170400 | 3.89152800  |
| H | 0.47307400  | -3.34788000 | 2.35981500  |
| H | -0.04577900 | -5.31301000 | 3.82684300  |
| H | 1.60149600  | -4.71597200 | 4.08644900  |
| H | 0.32750100  | -4.34612000 | 5.25669100  |
| H | 0.92750900  | -1.11007800 | 3.28228400  |
| H | 0.90128700  | -1.74930800 | 4.93863800  |
| H | 2.15361500  | -2.27114600 | 3.81230600  |
| O | -0.41097700 | 2.16786000  | 1.58272800  |
| C | 4.20623500  | 3.70161700  | -0.23932000 |
| C | 3.36239200  | 3.10923700  | -1.09910000 |
| H | 3.77272700  | 4.22691800  | 0.61347900  |
| H | 3.73221100  | 2.55772700  | -1.96189400 |
| C | 5.67574200  | 3.73309200  | -0.29327100 |
| C | 6.38046900  | 4.29894700  | 0.78461100  |
| C | 6.41908600  | 3.21894300  | -1.37315500 |
| C | 7.77397900  | 4.34284000  | 0.79347700  |
| H | 5.82432000  | 4.70832200  | 1.62445000  |

|                                              |            |             |                             |
|----------------------------------------------|------------|-------------|-----------------------------|
| C                                            | 7.81059700 | 3.26270200  | -1.36549900                 |
| H                                            | 5.90632100 | 2.79111500  | -2.22910600                 |
| C                                            | 8.49550700 | 3.82320600  | -0.28179300                 |
| H                                            | 8.29486800 | 4.78453500  | 1.63780300                  |
| H                                            | 8.36500900 | 2.86629800  | -2.21132500                 |
| H                                            | 9.58070800 | 3.85990800  | -0.28160700                 |
| C                                            | 1.86856400 | 3.16029000  | -0.96424400                 |
| H                                            | 1.43564200 | 3.76014900  | -1.77657500                 |
| H                                            | 1.58887800 | 3.64624400  | -0.01754600                 |
| O                                            | 1.25787900 | 1.87206900  | -1.08038800                 |
| H                                            | 1.58889500 | 1.30173200  | -0.35051700                 |
| C                                            | 5.24708700 | -0.02734600 | 1.41881900                  |
| C                                            | 3.99271100 | -0.30181200 | 1.80969300                  |
| H                                            | 5.49709000 | 1.01055300  | 1.19879100                  |
| H                                            | 3.67940400 | -1.32436700 | 2.01228300                  |
| C                                            | 6.35233300 | -0.97981700 | 1.23349400                  |
| C                                            | 7.52942200 | -0.53490300 | 0.60580600                  |
| C                                            | 6.29181000 | -2.32117000 | 1.65647200                  |
| C                                            | 8.60121600 | -1.40073800 | 0.39197100                  |
| H                                            | 7.59762300 | 0.49974300  | 0.27927300                  |
| C                                            | 7.36148100 | -3.18556900 | 1.44243400                  |
| H                                            | 5.40907300 | -2.68557000 | 2.17369100                  |
| C                                            | 8.52110800 | -2.73043300 | 0.80709900                  |
| H                                            | 9.50037700 | -1.03558400 | -0.09584600                 |
| H                                            | 7.29740600 | -4.21580700 | 1.78112200                  |
| H                                            | 9.35635800 | -3.40562400 | 0.64662800                  |
| C                                            | 2.94477600 | 0.74397000  | 2.02122300                  |
| H                                            | 3.33894500 | 1.73433700  | 1.76049000                  |
| H                                            | 2.64504100 | 0.76637700  | 3.07925100                  |
| O                                            | 1.78496500 | 0.43377700  | 1.21894600                  |
| H                                            | 1.02139500 | 0.93828600  | 1.55341600                  |
| Zero-point correction=                       |            |             | 1.127258 (Hartree/Particle) |
| Thermal correction to Energy=                |            |             | 1.198129                    |
| Thermal correction to Enthalpy=              |            |             | 1.199074                    |
| Thermal correction to Gibbs Free Energy=     |            |             | 1.004924                    |
| Sum of electronic and zero-point Energies=   |            |             | -2946.843324                |
| Sum of electronic and thermal Energies=      |            |             | -2946.772452                |
| Sum of electronic and thermal Enthalpies=    |            |             | -2946.771508                |
| Sum of electronic and thermal Free Energies= |            |             | -2946.965657                |

#### 5-INT1

|   |             |            |             |
|---|-------------|------------|-------------|
| C | -2.81271200 | 4.04614000 | -0.18947000 |
| O | -3.67697200 | 4.37060100 | -0.99554500 |



|    |             |             |             |
|----|-------------|-------------|-------------|
| C  | -2.05032100 | 5.08578100  | 0.57042300  |
| C  | -1.56738200 | 4.86292600  | 1.87358600  |
| C  | -1.90964700 | 6.35902000  | -0.00967800 |
| C  | -0.93996600 | 5.89432700  | 2.57382800  |
| H  | -1.71406800 | 3.89613500  | 2.34677800  |
| C  | -1.27095600 | 7.37928400  | 0.68755000  |
| C  | -0.78606900 | 7.14857400  | 1.97977800  |
| H  | -0.58561700 | 5.72244300  | 3.58544600  |
| H  | -1.15740200 | 8.35787500  | 0.23146800  |
| C  | -2.53693400 | 2.58614400  | 0.02194700  |
| C  | -1.27798200 | 2.05685100  | 0.16929400  |
| C  | -1.11953900 | 0.63526500  | 0.12392700  |
| C  | -1.46228500 | -0.56209600 | 0.13156000  |
| C  | -2.06773700 | -1.85289800 | 0.08071300  |
| C  | -1.48827900 | -2.98396900 | 0.68853700  |
| C  | -3.31491100 | -1.96212100 | -0.57347100 |
| C  | -2.15013900 | -4.20655800 | 0.63528100  |
| C  | -3.96997900 | -3.18936900 | -0.60166700 |
| H  | -3.75843100 | -1.08251900 | -1.02627000 |
| C  | -3.38882100 | -4.31175600 | -0.00398100 |
| H  | -1.69919000 | -5.07758900 | 1.09958200  |
| H  | -4.93674700 | -3.26719600 | -1.08820800 |
| H  | -3.90250100 | -5.26776100 | -0.03500800 |
| H  | -0.29738000 | 7.94980500  | 2.52602100  |
| H  | -2.31476600 | 6.52490600  | -1.00235200 |
| H  | -0.53212500 | -2.89786500 | 1.19377300  |
| Au | 0.89364000  | -0.30472500 | -0.02322000 |
| C  | 2.86643800  | -0.74697100 | -0.15222400 |
| C  | 5.07796100  | -0.58923900 | -0.55314500 |
| C  | 4.84793000  | -1.81225300 | -0.00919300 |
| H  | 5.51592500  | -2.62535600 | 0.22493100  |
| H  | 5.98780100  | -0.11841500 | -0.88858900 |
| N  | 3.85030200  | 0.05361700  | -0.63463000 |
| N  | 3.48301100  | -1.89375100 | 0.23309200  |
| C  | 3.67149000  | 1.39565700  | -1.15658500 |
| C  | 3.39864300  | 1.55017900  | -2.53038700 |
| C  | 3.81535000  | 2.48273600  | -0.27112300 |
| C  | 3.26871700  | 2.85915900  | -3.01083100 |
| C  | 3.68109500  | 3.76706500  | -0.81222200 |
| C  | 3.41106100  | 3.95526300  | -2.16488200 |
| H  | 3.05871000  | 3.02026400  | -4.06347000 |
| H  | 3.79312800  | 4.63066200  | -0.16423700 |
| H  | 3.31473600  | 4.96108600  | -2.56292500 |
| C  | 2.82772000  | -3.04986300 | 0.81210100  |

|   |            |             |             |
|---|------------|-------------|-------------|
| C | 2.67160000 | -3.10137200 | 2.21247000  |
| C | 2.40480000 | -4.08209600 | -0.04951900 |
| C | 2.05439000 | -4.24089100 | 2.74423500  |
| C | 1.79921000 | -5.19836000 | 0.54174100  |
| C | 1.62556700 | -5.27927400 | 1.92104100  |
| H | 1.91925700 | -4.31943700 | 3.81837000  |
| H | 1.46503100 | -6.01695800 | -0.08773200 |
| H | 1.16250400 | -6.15925700 | 2.35799000  |
| C | 3.15139100 | -1.99537800 | 3.14780800  |
| C | 4.24536200 | -2.50621000 | 4.10649600  |
| C | 1.97997200 | -1.36433700 | 3.92530300  |
| H | 3.59891500 | -1.20258100 | 2.54114300  |
| H | 5.09559400 | -2.92414400 | 3.55845400  |
| H | 4.61438200 | -1.68669500 | 4.73122300  |
| H | 3.86452400 | -3.28587500 | 4.77387800  |
| H | 1.22083400 | -0.96434700 | 3.24499600  |
| H | 1.49310400 | -2.09244400 | 4.58223000  |
| H | 2.34061100 | -0.54302500 | 4.55298600  |
| C | 2.57911300 | -4.02705700 | -1.56447300 |
| C | 1.21760100 | -4.01794000 | -2.28664900 |
| C | 3.47109400 | -5.17645700 | -2.07370400 |
| H | 3.08476700 | -3.09007200 | -1.81689700 |
| H | 0.59342900 | -3.18294500 | -1.95326800 |
| H | 1.36304700 | -3.92581700 | -3.36777100 |
| H | 0.66125300 | -4.94313900 | -2.10518400 |
| H | 4.45174200 | -5.17053900 | -1.58756800 |
| H | 3.01432000 | -6.15386000 | -1.88827500 |
| H | 3.62715500 | -5.08446200 | -3.15315400 |
| C | 4.12337800 | 2.31307300  | 1.21373300  |
| C | 3.07920300 | 3.01792800  | 2.10112200  |
| C | 5.54951200 | 2.79750300  | 1.54429800  |
| H | 4.07649400 | 1.24626300  | 1.45354800  |
| H | 2.06450300 | 2.68677700  | 1.86181000  |
| H | 3.27676100 | 2.80182000  | 3.15625400  |
| H | 3.11645200 | 4.10551500  | 1.97921800  |
| H | 6.30362900 | 2.26441400  | 0.95653800  |
| H | 5.66298000 | 3.86637200  | 1.33608000  |
| H | 5.77159300 | 2.63825700  | 2.60440200  |
| C | 3.24680400 | 0.37434100  | -3.49070200 |
| C | 4.33452700 | 0.39455900  | -4.58295500 |
| C | 1.83618300 | 0.33369500  | -4.11053800 |
| H | 3.37555400 | -0.55263700 | -2.92363800 |
| H | 5.33959500 | 0.38691500  | -4.14933100 |
| H | 4.23836200 | -0.48207100 | -5.23154700 |

|                                              |              |             |                             |
|----------------------------------------------|--------------|-------------|-----------------------------|
| H                                            | 4.25250300   | 1.28458000  | -5.21495400                 |
| H                                            | 1.06313900   | 0.28788700  | -3.33654000                 |
| H                                            | 1.64163900   | 1.21825500  | -4.72534900                 |
| H                                            | 1.72907900   | -0.54616100 | -4.75317700                 |
| O                                            | -0.10192200  | 2.74242000  | 0.25496100                  |
| C                                            | -6.71661200  | 0.46478100  | -0.40402100                 |
| C                                            | -5.66422700  | 0.77574100  | 0.37018500                  |
| H                                            | -6.99286200  | 1.17240100  | -1.18632900                 |
| H                                            | -5.32637700  | 0.10571400  | 1.15804900                  |
| C                                            | -7.56192200  | -0.73497800 | -0.33519100                 |
| C                                            | -8.54532800  | -0.92372200 | -1.32243200                 |
| C                                            | -7.43659700  | -1.71054400 | 0.67278900                  |
| C                                            | -9.36940900  | -2.04810400 | -1.31343100                 |
| H                                            | -8.66094900  | -0.17727200 | -2.10419600                 |
| C                                            | -8.25931900  | -2.83321500 | 0.68223900                  |
| H                                            | -6.70216100  | -1.58471200 | 1.46254700                  |
| C                                            | -9.22859200  | -3.00829700 | -0.31091900                 |
| H                                            | -10.12262300 | -2.17158500 | -2.08582100                 |
| H                                            | -8.15301100  | -3.57105800 | 1.47235500                  |
| H                                            | -9.87230100  | -3.88266900 | -0.29677800                 |
| C                                            | -4.89788400  | 2.04654600  | 0.21295200                  |
| H                                            | -4.84031400  | 2.59581400  | 1.16233100                  |
| H                                            | -5.33901800  | 2.70034100  | -0.54160300                 |
| O                                            | -3.54074100  | 1.69748700  | -0.19829700                 |
| H                                            | -0.27428500  | 3.69280300  | 0.35464400                  |
| Zero-point correction=                       |              |             | 0.960376 (Hartree/Particle) |
| Thermal correction to Energy=                |              |             | 1.020334                    |
| Thermal correction to Enthalpy=              |              |             | 1.021278                    |
| Thermal correction to Gibbs Free Energy=     |              |             | 0.854108                    |
| Sum of electronic and zero-point Energies=   |              |             | -2522.861644                |
| Sum of electronic and thermal Energies=      |              |             | -2522.801686                |
| Sum of electronic and thermal Enthalpies=    |              |             | -2522.800742                |
| Sum of electronic and thermal Free Energies= |              |             | -2522.967912                |

#### 5-TS2

|   |             |             |             |
|---|-------------|-------------|-------------|
| C | -0.32855700 | -3.16459800 | -0.09695600 |
| O | -0.23788000 | -3.58427500 | 1.05462800  |
| C | -1.00643500 | -3.85787100 | -1.20477900 |
| C | -0.93019900 | -3.36991400 | -2.51938300 |
| C | -1.72540800 | -5.03206200 | -0.92691000 |
| C | -1.57359300 | -4.05139200 | -3.54925100 |
| H | -0.35730900 | -2.47268100 | -2.73955400 |
| C | -2.36499400 | -5.70896500 | -1.95965200 |

|    |             |             |             |
|----|-------------|-------------|-------------|
| C  | -2.28988600 | -5.21863300 | -3.26847800 |
| H  | -1.51132000 | -3.68215200 | -4.56788700 |
| H  | -2.91993200 | -6.61829700 | -1.75136100 |
| C  | 0.29597300  | -1.81940000 | -0.29662000 |
| C  | 1.77860900  | -1.85095800 | -0.63695800 |
| C  | 2.18937700  | -0.77870600 | -1.53885700 |
| C  | 2.57570800  | 0.04684600  | -2.34100600 |
| C  | 3.06044700  | 0.99028100  | -3.29548900 |
| C  | 3.30361300  | 0.58327500  | -4.62227900 |
| C  | 3.31880300  | 2.32326500  | -2.92026400 |
| C  | 3.78866800  | 1.49765200  | -5.55306500 |
| C  | 3.81021300  | 3.22679300  | -3.85881200 |
| H  | 3.13325300  | 2.63523400  | -1.89780300 |
| C  | 4.04374300  | 2.81838800  | -5.17489900 |
| H  | 3.97327700  | 1.17836000  | -6.57401100 |
| H  | 4.01633600  | 4.25132200  | -3.56391500 |
| H  | 4.42737200  | 3.52664800  | -5.90282300 |
| H  | -2.78805800 | -5.75131800 | -4.07311700 |
| H  | -1.76501200 | -5.39230800 | 0.09591700  |
| H  | 3.11229600  | -0.44594700 | -4.90770400 |
| Au | -0.84988600 | -0.23931700 | 0.15186600  |
| C  | -2.14859100 | 1.26291600  | 0.68748200  |
| C  | -3.07410800 | 3.23344100  | 1.29032500  |
| C  | -4.05926200 | 2.29623300  | 1.30719000  |
| H  | -5.10825300 | 2.37112500  | 1.54448600  |
| H  | -3.09119800 | 4.28857400  | 1.51122000  |
| N  | -1.91049300 | 2.58327500  | 0.90968000  |
| N  | -3.47611300 | 1.09573200  | 0.93610300  |
| C  | -0.62372100 | 3.23530600  | 0.77788600  |
| C  | 0.20236500  | 3.32232500  | 1.91678600  |
| C  | -0.27158700 | 3.77571000  | -0.47431100 |
| C  | 1.44050100  | 3.95750700  | 1.75940600  |
| C  | 0.97631000  | 4.40555400  | -0.56829900 |
| C  | 1.82555400  | 4.49159300  | 0.53213400  |
| H  | 2.10586900  | 4.04586700  | 2.61259600  |
| H  | 1.28065600  | 4.83977300  | -1.51538500 |
| H  | 2.78595600  | 4.99009200  | 0.43791300  |
| C  | -4.20330100 | -0.15530000 | 0.82573200  |
| C  | -4.84444400 | -0.44974600 | -0.39437000 |
| C  | -4.26423200 | -1.00014900 | 1.95225800  |
| C  | -5.57257900 | -1.64397700 | -0.46091800 |
| C  | -5.00778200 | -2.17997200 | 1.82394900  |
| C  | -5.65650000 | -2.49891000 | 0.63438400  |
| H  | -6.08218500 | -1.90511000 | -1.38300100 |

|   |             |             |             |
|---|-------------|-------------|-------------|
| H | -5.08193100 | -2.85476000 | 2.67058000  |
| H | -6.23183100 | -3.41702000 | 0.56132600  |
| C | -4.77493800 | 0.46263300  | -1.61545000 |
| C | -6.16595800 | 1.01168900  | -1.98925900 |
| C | -4.11772000 | -0.24927400 | -2.81395900 |
| H | -4.14368500 | 1.32143500  | -1.36796500 |
| H | -6.62146800 | 1.55367200  | -1.15439700 |
| H | -6.08874300 | 1.69906200  | -2.83779400 |
| H | -6.85125000 | 0.20726200  | -2.27521300 |
| H | -3.12173200 | -0.62379500 | -2.55664100 |
| H | -4.71664000 | -1.10018400 | -3.15399600 |
| H | -4.01706700 | 0.44238600  | -3.65683300 |
| C | -3.58577400 | -0.67347500 | 3.27922800  |
| C | -2.65347300 | -1.80865800 | 3.74491500  |
| C | -4.62790200 | -0.33041700 | 4.36338000  |
| H | -2.96243200 | 0.21430600  | 3.13517300  |
| H | -1.90801000 | -2.05963300 | 2.98391600  |
| H | -2.12532000 | -1.50941400 | 4.65606500  |
| H | -3.21213500 | -2.72072100 | 3.97794600  |
| H | -5.26289200 | 0.50889100  | 4.06161100  |
| H | -5.28242000 | -1.18338200 | 4.57028900  |
| H | -4.12919600 | -0.05847600 | 5.29930100  |
| C | -1.18702100 | 3.71460800  | -1.69371700 |
| C | -0.55639000 | 2.89545600  | -2.83611700 |
| C | -1.58019800 | 5.12626100  | -2.17268200 |
| H | -2.10994900 | 3.20413400  | -1.40280300 |
| H | -0.30976100 | 1.88030600  | -2.50922800 |
| H | -1.25227400 | 2.82419100  | -3.67853100 |
| H | 0.36421500  | 3.35856100  | -3.20471500 |
| H | -2.05546900 | 5.70452300  | -1.37409000 |
| H | -0.70856800 | 5.69099600  | -2.51855900 |
| H | -2.28392100 | 5.06018200  | -3.00851300 |
| C | -0.20785300 | 2.78618100  | 3.28610400  |
| C | -0.30805500 | 3.92262000  | 4.32332400  |
| C | 0.74013200  | 1.67376600  | 3.77298700  |
| H | -1.20373200 | 2.34226000  | 3.19620700  |
| H | -1.00308600 | 4.70296500  | 3.99790200  |
| H | -0.66242400 | 3.53083900  | 5.28196500  |
| H | 0.66375900  | 4.39542900  | 4.49722300  |
| H | 0.75714900  | 0.83352500  | 3.07162900  |
| H | 1.76501900  | 2.04145400  | 3.88938900  |
| H | 0.41189700  | 1.29504600  | 4.74626100  |
| O | 2.22748000  | -3.05864300 | -1.17924100 |
| O | 2.20305100  | -1.77547200 | 0.72595300  |

|                                              |             |             |                             |
|----------------------------------------------|-------------|-------------|-----------------------------|
| H                                            | 2.32125900  | -3.68252200 | -0.44146900                 |
| C                                            | 2.96188300  | -0.61463900 | 1.21372900                  |
| H                                            | 2.59381400  | 0.27908900  | 0.70095200                  |
| H                                            | 2.70351000  | -0.55572900 | 2.27223200                  |
| C                                            | 5.25573300  | -1.11970600 | 2.02829500                  |
| C                                            | 4.42280100  | -0.83266400 | 1.01109900                  |
| H                                            | 4.82439200  | -1.19120300 | 3.02763100                  |
| H                                            | 4.78265200  | -0.75648700 | -0.01167800                 |
| C                                            | 6.70316900  | -1.34189500 | 1.97178000                  |
| C                                            | 7.38958100  | -1.60791500 | 3.17069400                  |
| C                                            | 7.44291900  | -1.30433500 | 0.77354100                  |
| C                                            | 8.76509000  | -1.83028300 | 3.17760200                  |
| H                                            | 6.83322000  | -1.64137700 | 4.10407900                  |
| C                                            | 8.81565900  | -1.52643600 | 0.78044900                  |
| H                                            | 6.94284600  | -1.10268200 | -0.16870100                 |
| C                                            | 9.48293300  | -1.78992800 | 1.98166000                  |
| H                                            | 9.27509300  | -2.03497000 | 4.11401900                  |
| H                                            | 9.37061200  | -1.49525600 | -0.15246800                 |
| H                                            | 10.55487800 | -1.96269500 | 1.98222200                  |
| Zero-point correction=                       |             |             | 0.958158 (Hartree/Particle) |
| Thermal correction to Energy=                |             |             | 1.017871                    |
| Thermal correction to Enthalpy=              |             |             | 1.018815                    |
| Thermal correction to Gibbs Free Energy=     |             |             | 0.849792                    |
| Sum of electronic and zero-point Energies=   |             |             | -2522.796862                |
| Sum of electronic and thermal Energies=      |             |             | -2522.737149                |
| Sum of electronic and thermal Enthalpies=    |             |             | -2522.736205                |
| Sum of electronic and thermal Free Energies= |             |             | -2522.905228                |

## 5-INT2

|   |            |             |             |
|---|------------|-------------|-------------|
| C | 1.70857500 | 0.10431300  | 1.60901900  |
| O | 1.74150000 | -1.03518500 | 2.08429300  |
| C | 2.16736700 | 1.32868800  | 2.25590600  |
| C | 2.91106300 | 1.21533700  | 3.44427400  |
| C | 1.86174300 | 2.59481800  | 1.72927700  |
| C | 3.35585800 | 2.36239400  | 4.09110700  |
| H | 3.13368600 | 0.22756200  | 3.83432500  |
| C | 2.30220600 | 3.73912400  | 2.38926700  |
| C | 3.05106100 | 3.62270400  | 3.56430200  |
| H | 3.93782200 | 2.28034100  | 5.00343600  |
| H | 2.06139800 | 4.72013800  | 1.99202600  |
| C | 1.05028000 | -0.12699800 | 0.30920600  |
| C | 1.96953500 | -0.49511700 | -0.83387200 |
| C | 1.89158400 | 0.84982200  | -1.43851600 |

|    |             |             |             |
|----|-------------|-------------|-------------|
| C  | 1.86145900  | 1.99488000  | -1.86020300 |
| C  | 1.84378000  | 3.31994900  | -2.36677500 |
| C  | 0.93976000  | 3.67961600  | -3.38948400 |
| C  | 2.74166900  | 4.28343000  | -1.85767100 |
| C  | 0.93932500  | 4.97759200  | -3.88844100 |
| C  | 2.72827200  | 5.57878000  | -2.36346500 |
| H  | 3.43777200  | 4.00102700  | -1.07463400 |
| C  | 1.83045200  | 5.92687400  | -3.37763100 |
| H  | 0.24791900  | 5.25131600  | -4.67902500 |
| H  | 3.42105600  | 6.31767200  | -1.97334300 |
| H  | 1.82758000  | 6.93810300  | -3.77280600 |
| H  | 3.39690600  | 4.51723400  | 4.07379400  |
| H  | 1.27375900  | 2.67690100  | 0.82178700  |
| H  | 0.25775300  | 2.93332200  | -3.78276500 |
| Au | -0.95604800 | -0.32651200 | 0.16124200  |
| C  | -2.97678200 | -0.64333700 | 0.02351100  |
| C  | -4.95900500 | -1.61969000 | -0.44354100 |
| C  | -5.22083300 | -0.42897900 | 0.15717700  |
| H  | -6.15232800 | 0.05131700  | 0.40994600  |
| H  | -5.61647100 | -2.38807600 | -0.81719600 |
| N  | -3.57867800 | -1.73582800 | -0.51747100 |
| N  | -3.99425200 | 0.15653800  | 0.43788400  |
| C  | -2.88604900 | -2.88657400 | -1.06495000 |
| C  | -2.54672800 | -2.88238200 | -2.43297200 |
| C  | -2.60650200 | -3.96859300 | -0.20559400 |
| C  | -1.90762800 | -4.02264600 | -2.93572200 |
| C  | -1.96171000 | -5.07884000 | -0.76541700 |
| C  | -1.61834400 | -5.10899600 | -2.11423200 |
| H  | -1.63483500 | -4.05934600 | -3.98546300 |
| H  | -1.73074700 | -5.93235800 | -0.13581400 |
| H  | -1.12552300 | -5.98394300 | -2.52782800 |
| C  | -3.83459700 | 1.43800000  | 1.09592900  |
| C  | -3.72740800 | 1.46201500  | 2.50111400  |
| C  | -3.81759000 | 2.60264700  | 0.30322100  |
| C  | -3.58098000 | 2.71526900  | 3.10878100  |
| C  | -3.67201500 | 3.82660600  | 0.96779400  |
| C  | -3.55200900 | 3.88431900  | 2.35361600  |
| H  | -3.49439800 | 2.77474200  | 4.18915300  |
| H  | -3.65653600 | 4.74639400  | 0.39140500  |
| H  | -3.44275800 | 4.84508500  | 2.84797800  |
| C  | -3.77715100 | 0.20403000  | 3.36324800  |
| C  | -4.98963500 | 0.22382700  | 4.31528500  |
| C  | -2.46323000 | -0.00292300 | 4.14152900  |
| H  | -3.89980400 | -0.65989100 | 2.70320500  |

|   |             |             |             |
|---|-------------|-------------|-------------|
| H | -5.92964100 | 0.33805300  | 3.76627100  |
| H | -5.04021500 | -0.71022300 | 4.88387100  |
| H | -4.92339100 | 1.04601200  | 5.03509700  |
| H | -1.60607700 | -0.07391500 | 3.46433300  |
| H | -2.27503500 | 0.82028900  | 4.83843500  |
| H | -2.51125000 | -0.92714200 | 4.72641600  |
| C | -3.95576400 | 2.57717700  | -1.21623000 |
| C | -2.69922800 | 3.14145600  | -1.90703600 |
| C | -5.22488300 | 3.31955000  | -1.67914700 |
| H | -4.05594400 | 1.53531200  | -1.53446400 |
| H | -1.80239700 | 2.58679600  | -1.61308000 |
| H | -2.80394000 | 3.07292100  | -2.99513700 |
| H | -2.54043900 | 4.19515500  | -1.65529200 |
| H | -6.12467600 | 2.90308500  | -1.21567300 |
| H | -5.18335900 | 4.38358100  | -1.42501100 |
| H | -5.33636400 | 3.24193600  | -2.76545600 |
| C | -2.97167700 | -3.97495500 | 1.27621100  |
| C | -1.71661600 | -4.06678000 | 2.16625600  |
| C | -3.97141100 | -5.10147700 | 1.60470900  |
| H | -3.46401500 | -3.02686900 | 1.51268600  |
| H | -1.02507300 | -3.24141100 | 1.96910900  |
| H | -1.99934700 | -4.02850400 | 3.22328900  |
| H | -1.17562800 | -5.00460600 | 2.00374900  |
| H | -4.88150100 | -5.01972400 | 1.00192800  |
| H | -3.53842700 | -6.08968600 | 1.41955900  |
| H | -4.25850200 | -5.05851500 | 2.66020600  |
| C | -2.85636900 | -1.71345900 | -3.36290900 |
| C | -3.97693600 | -2.07725100 | -4.35754500 |
| C | -1.59626500 | -1.21880500 | -4.09912900 |
| H | -3.21805800 | -0.88029400 | -2.75265800 |
| H | -4.89303000 | -2.37933100 | -3.83979900 |
| H | -4.21552400 | -1.22005600 | -4.99565700 |
| H | -3.67611100 | -2.90445600 | -5.00875200 |
| H | -0.78636100 | -0.99132000 | -3.39957800 |
| H | -1.22407600 | -1.96431300 | -4.80943800 |
| H | -1.82843900 | -0.31433600 | -4.67136900 |
| O | 1.44586700  | -1.43217900 | -1.73688400 |
| C | 6.67284600  | -0.92944500 | -0.70011300 |
| C | 5.48070500  | -1.54524000 | -0.72348900 |
| H | 6.73964600  | 0.05989900  | -1.15476200 |
| H | 5.34349700  | -2.52944500 | -0.28156000 |
| C | 7.93442400  | -1.42761700 | -0.13626700 |
| C | 9.07255800  | -0.60480700 | -0.20181700 |
| C | 8.06266800  | -2.69110400 | 0.47121400  |



|                                              |             |             |                             |
|----------------------------------------------|-------------|-------------|-----------------------------|
| C                                            | 10.29548200 | -1.02240500 | 0.32088300                  |
| H                                            | 8.99290300  | 0.37330200  | -0.66998000                 |
| C                                            | 9.28255700  | -3.10832100 | 0.99406500                  |
| H                                            | 7.20506900  | -3.35400800 | 0.53385000                  |
| C                                            | 10.40480100 | -2.27667400 | 0.92183000                  |
| H                                            | 11.16128600 | -0.36993200 | 0.25751100                  |
| H                                            | 9.36186100  | -4.08711200 | 1.45809300                  |
| H                                            | 11.35558800 | -2.60716700 | 1.32903600                  |
| C                                            | 4.27444400  | -0.95361200 | -1.37224000                 |
| H                                            | 3.88851600  | -1.59556900 | -2.17301800                 |
| H                                            | 4.49202400  | 0.03546100  | -1.79367200                 |
| O                                            | 3.23636500  | -0.82642900 | -0.35918200                 |
| H                                            | 1.27980900  | -2.24873700 | -1.23999200                 |
| Zero-point correction=                       |             |             | 0.958993 (Hartree/Particle) |
| Thermal correction to Energy=                |             |             | 1.019238                    |
| Thermal correction to Enthalpy=              |             |             | 1.020182                    |
| Thermal correction to Gibbs Free Energy=     |             |             | 0.850479                    |
| Sum of electronic and zero-point Energies=   |             |             | -2522.811434                |
| Sum of electronic and thermal Energies=      |             |             | -2522.751189                |
| Sum of electronic and thermal Enthalpies=    |             |             | -2522.750245                |
| Sum of electronic and thermal Free Energies= |             |             | -2522.919948                |

#### 5-TS1-2

|   |             |             |             |
|---|-------------|-------------|-------------|
| C | 1.05041400  | 0.36633800  | 1.42810600  |
| O | 1.61519800  | -0.73061400 | 1.33454400  |
| C | 1.13796100  | 1.26579800  | 2.57956300  |
| C | 2.08796900  | 0.97810800  | 3.57569200  |
| C | 0.28842400  | 2.37606000  | 2.71592200  |
| C | 2.19494400  | 1.80382500  | 4.68891000  |
| H | 2.72826500  | 0.11031600  | 3.45604300  |
| C | 0.39477900  | 3.19341400  | 3.83861300  |
| C | 1.34894200  | 2.91082000  | 4.82029800  |
| H | 2.93200000  | 1.58884500  | 5.45604100  |
| H | -0.26539000 | 4.04770100  | 3.95100000  |
| C | 0.24038100  | 0.48673300  | 0.20206700  |
| C | 0.88207900  | 1.02146400  | -1.06450700 |
| C | 0.31081300  | 2.36831300  | -0.86179000 |
| C | -0.24984800 | 3.44238800  | -0.69637200 |
| C | -0.87115900 | 4.70232100  | -0.50706600 |
| C | -2.07247700 | 5.01002300  | -1.18257200 |
| C | -0.28425400 | 5.66043700  | 0.34872200  |
| C | -2.66665100 | 6.25427200  | -1.00145500 |
| C | -0.89063300 | 6.89982300  | 0.52108200  |

|    |             |             |             |
|----|-------------|-------------|-------------|
| H  | 0.64029900  | 5.41901100  | 0.86298000  |
| C  | -2.07918000 | 7.19839600  | -0.15277800 |
| H  | -3.58672300 | 6.49459300  | -1.52497600 |
| H  | -0.43654100 | 7.63685500  | 1.17576600  |
| H  | -2.54670900 | 8.16908900  | -0.01862900 |
| H  | 1.43230000  | 3.55244000  | 5.69248000  |
| H  | -0.45428600 | 2.58643600  | 1.95477800  |
| H  | -2.51848400 | 4.26936300  | -1.83823600 |
| Au | -1.59931400 | -0.33940900 | 0.06653300  |
| C  | -3.41578800 | -1.26726600 | -0.14869000 |
| C  | -5.44439900 | -1.86540800 | -0.94289700 |
| C  | -5.11402300 | -2.74498500 | 0.03876000  |
| H  | -5.64060200 | -3.59619700 | 0.43919200  |
| H  | -6.31977700 | -1.79172700 | -1.56779100 |
| N  | -4.39261500 | -0.96589400 | -1.04550800 |
| N  | -3.86822000 | -2.36342800 | 0.51580300  |
| C  | -4.37512100 | 0.15911300  | -1.96012500 |
| C  | -4.97870500 | 1.36259500  | -1.54441100 |
| C  | -3.78419400 | -0.00906300 | -3.22909100 |
| C  | -4.97764900 | 2.42662900  | -2.45565600 |
| C  | -3.81595200 | 1.08941600  | -4.09683500 |
| C  | -4.40524300 | 2.29272000  | -3.71810800 |
| H  | -5.44174300 | 3.36705000  | -2.17435300 |
| H  | -3.37648700 | 0.99855200  | -5.08439900 |
| H  | -4.42508600 | 3.12654300  | -4.41394300 |
| C  | -3.15869000 | -3.05198800 | 1.57625900  |
| C  | -2.29187000 | -4.10767000 | 1.23082800  |
| C  | -3.38928500 | -2.65115300 | 2.90740400  |
| C  | -1.63478600 | -4.76409700 | 2.27878100  |
| C  | -2.70459700 | -3.34579000 | 3.91210400  |
| C  | -1.83620700 | -4.38916400 | 3.60397900  |
| H  | -0.95945100 | -5.58305900 | 2.05227600  |
| H  | -2.85783300 | -3.06725500 | 4.94998100  |
| H  | -1.31789700 | -4.91517300 | 4.40014400  |
| C  | -2.05429800 | -4.55467100 | -0.20849700 |
| C  | -2.53464900 | -6.00192200 | -0.43424900 |
| C  | -0.57657300 | -4.38869400 | -0.61294100 |
| H  | -2.64237600 | -3.91138100 | -0.86980100 |
| H  | -3.59413100 | -6.11640200 | -0.18415300 |
| H  | -2.40078600 | -6.28837700 | -1.48236400 |
| H  | -1.97057500 | -6.71221700 | 0.17880300  |
| H  | -0.24451400 | -3.35444100 | -0.47626800 |
| H  | 0.07747300  | -5.03365300 | -0.01697900 |
| H  | -0.44051200 | -4.65955700 | -1.66532800 |

|   |             |             |             |
|---|-------------|-------------|-------------|
| C | -4.34833300 | -1.52574700 | 3.28465200  |
| C | -3.63179400 | -0.39758600 | 4.05133300  |
| C | -5.55079600 | -2.06447800 | 4.08557200  |
| H | -4.74195400 | -1.08672100 | 2.36301400  |
| H | -2.79698600 | 0.00869500  | 3.47159800  |
| H | -4.33103400 | 0.41802800  | 4.26303900  |
| H | -3.23553100 | -0.74884000 | 5.00941400  |
| H | -6.09057800 | -2.83715800 | 3.52885000  |
| H | -5.23277800 | -2.50314800 | 5.03687500  |
| H | -6.25343800 | -1.25555400 | 4.31071300  |
| C | -3.16738500 | -1.32701000 | -3.68762400 |
| C | -1.77190100 | -1.13948600 | -4.31230200 |
| C | -4.11549700 | -2.06105200 | -4.65899300 |
| H | -3.04025400 | -1.96489300 | -2.80744600 |
| H | -1.09228800 | -0.60856600 | -3.63946400 |
| H | -1.33755500 | -2.11863500 | -4.54053000 |
| H | -1.82006200 | -0.58419400 | -5.25491800 |
| H | -5.09328300 | -2.25341000 | -4.20514900 |
| H | -4.28109900 | -1.47219500 | -5.56727200 |
| H | -3.68639300 | -3.02310600 | -4.95727400 |
| C | -5.61338500 | 1.54471500  | -0.16810600 |
| C | -7.09641100 | 1.95059500  | -0.27050100 |
| C | -4.81715100 | 2.55301000  | 0.68362700  |
| H | -5.57843700 | 0.58518200  | 0.35604400  |
| H | -7.67179900 | 1.22389300  | -0.85240600 |
| H | -7.54113800 | 2.01459800  | 0.72773600  |
| H | -7.21697300 | 2.92818300  | -0.74800600 |
| H | -3.77776400 | 2.23149300  | 0.80638400  |
| H | -4.80853300 | 3.54717400  | 0.22487900  |
| H | -5.26544700 | 2.64896900  | 1.67812900  |
| O | 0.78593500  | 0.43842500  | -2.19819700 |
| O | 2.51207600  | 1.18929200  | -0.65677500 |
| H | 1.95225100  | -0.55730300 | -2.22918000 |
| O | 2.89445200  | -0.81833300 | -1.89345000 |
| H | 2.89098000  | 0.09691500  | -1.13136800 |
| C | 5.45489900  | -1.98849900 | -1.51502100 |
| C | 4.34062600  | -2.65962400 | -1.19513800 |
| H | 5.35238600  | -0.98309200 | -1.91772600 |
| H | 4.39697300  | -3.65535100 | -0.75857900 |
| C | 6.83793900  | -2.46771900 | -1.35826200 |
| C | 7.15960600  | -3.82183400 | -1.14998700 |
| C | 7.89060500  | -1.53889800 | -1.42735900 |
| C | 8.48305400  | -4.22569600 | -0.99940500 |
| H | 6.37107100  | -4.56838300 | -1.12641900 |

|                                              |             |             |                             |
|----------------------------------------------|-------------|-------------|-----------------------------|
| C                                            | 9.21638400  | -1.94270500 | -1.27423100                 |
| H                                            | 7.66397100  | -0.48851600 | -1.58788700                 |
| C                                            | 9.51825800  | -3.28759100 | -1.05830000                 |
| H                                            | 8.71051800  | -5.27664600 | -0.84538700                 |
| H                                            | 10.01178000 | -1.20499200 | -1.32368200                 |
| H                                            | 10.55025700 | -3.60606800 | -0.94474100                 |
| C                                            | 2.93695100  | -2.17360300 | -1.37556400                 |
| H                                            | 2.40509900  | -2.80055700 | -2.10287300                 |
| H                                            | 2.38210600  | -2.21115700 | -0.43104400                 |
| C                                            | 5.23806300  | 1.71671200  | -0.05210100                 |
| C                                            | 4.63612100  | 2.29856600  | -1.09959000                 |
| H                                            | 4.62851500  | 1.11188000  | 0.61664400                  |
| H                                            | 5.20074200  | 2.91717500  | -1.79479600                 |
| C                                            | 6.66216700  | 1.79705100  | 0.30863700                  |
| C                                            | 7.60731200  | 2.53690500  | -0.42779500                 |
| C                                            | 7.10896400  | 1.09990400  | 1.44457500                  |
| C                                            | 8.94321600  | 2.57438300  | -0.03903000                 |
| H                                            | 7.29931800  | 3.08967500  | -1.31028200                 |
| C                                            | 8.44661200  | 1.13727400  | 1.83543000                  |
| H                                            | 6.39542900  | 0.51809400  | 2.02264400                  |
| C                                            | 9.37004700  | 1.87524800  | 1.09470400                  |
| H                                            | 9.65555100  | 3.15242000  | -0.62057500                 |
| H                                            | 8.76744900  | 0.58775700  | 2.71544500                  |
| H                                            | 10.41293300 | 1.90744200  | 1.39533100                  |
| C                                            | 3.17724400  | 2.21135800  | -1.43370700                 |
| H                                            | 2.67806800  | 3.16550000  | -1.22462900                 |
| H                                            | 3.03256100  | 1.99850400  | -2.50187900                 |
| Zero-point correction=                       |             |             | 1.122268 (Hartree/Particle) |
| Thermal correction to Energy=                |             |             | 1.192545                    |
| Thermal correction to Enthalpy=              |             |             | 1.193489                    |
| Thermal correction to Gibbs Free Energy=     |             |             | 0.999814                    |
| Sum of electronic and zero-point Energies=   |             |             | -2946.808999                |
| Sum of electronic and thermal Energies=      |             |             | -2946.738721                |
| Sum of electronic and thermal Enthalpies=    |             |             | -2946.737777                |
| Sum of electronic and thermal Free Energies= |             |             | -2946.931452                |

#### 5-TS1-3

|    |             |             |             |
|----|-------------|-------------|-------------|
| C  | 1.29938500  | 0.43272300  | 0.57649600  |
| O  | 1.74924500  | -0.68950700 | 0.84247100  |
| C  | 0.31956600  | 0.28601800  | -0.51521200 |
| C  | 0.74808100  | 0.25466500  | -1.96625700 |
| Au | -1.59726200 | -0.14496200 | -0.04773000 |
| C  | -3.52914200 | -0.67528500 | 0.40519700  |

|   |             |             |             |
|---|-------------|-------------|-------------|
| C | -5.75378800 | -1.03639500 | 0.25227400  |
| C | -5.34198400 | -1.52361900 | 1.45223100  |
| H | -5.88442300 | -2.00762100 | 2.24833200  |
| H | -6.72831700 | -1.00636100 | -0.20769000 |
| N | -4.63030700 | -0.51995000 | -0.37715600 |
| N | -3.97600300 | -1.29435900 | 1.53004300  |
| C | -4.65149600 | 0.10500000  | -1.68484400 |
| C | -4.96702600 | 1.47607900  | -1.76515600 |
| C | -4.39185800 | -0.69318600 | -2.81749400 |
| C | -5.02140700 | 2.04638900  | -3.04325400 |
| C | -4.45752200 | -0.06592800 | -4.06842600 |
| C | -4.77172300 | 1.28596900  | -4.18282500 |
| H | -5.27058900 | 3.09817900  | -3.14535200 |
| H | -4.26873500 | -0.64813900 | -4.96457900 |
| H | -4.82888900 | 1.74631900  | -5.16496900 |
| C | -3.14686600 | -1.68342500 | 2.65395700  |
| C | -2.59251800 | -2.97913300 | 2.66181300  |
| C | -2.94720500 | -0.75533300 | 3.69506800  |
| C | -1.79565400 | -3.32650300 | 3.75954400  |
| C | -2.14303400 | -1.16106800 | 4.76724300  |
| C | -1.57038000 | -2.42941700 | 4.79985100  |
| H | -1.34748800 | -4.31423500 | 3.79959900  |
| H | -1.96558700 | -0.47345000 | 5.58824200  |
| H | -0.94998600 | -2.72199100 | 5.64168200  |
| C | -2.82052100 | -3.99011500 | 1.54177000  |
| C | -3.48227900 | -5.27994800 | 2.06543900  |
| C | -1.50876500 | -4.30168000 | 0.79517000  |
| H | -3.50859600 | -3.54918200 | 0.81427500  |
| H | -4.42571800 | -5.06741600 | 2.57806200  |
| H | -3.69380800 | -5.96146400 | 1.23529600  |
| H | -2.83338000 | -5.80975000 | 2.77008300  |
| H | -1.06528400 | -3.38942700 | 0.38285500  |
| H | -0.77147200 | -4.76481600 | 1.45914600  |
| H | -1.69679300 | -4.99552800 | -0.03100500 |
| C | -3.56705100 | 0.63879000  | 3.69946500  |
| C | -2.48666100 | 1.73760300  | 3.71283800  |
| C | -4.55116200 | 0.81230200  | 4.87317000  |
| H | -4.13956900 | 0.76268500  | 2.77535100  |
| H | -1.80643000 | 1.63611800  | 2.86111100  |
| H | -2.95239300 | 2.72752500  | 3.66372600  |
| H | -1.88617400 | 1.69976900  | 4.62760200  |
| H | -5.34141900 | 0.05539000  | 4.84897100  |
| H | -4.04232300 | 0.72986300  | 5.83892600  |
| H | -5.02435100 | 1.79862900  | 4.83042800  |

|   |             |             |             |
|---|-------------|-------------|-------------|
| C | -4.07819700 | -2.18381800 | -2.73186100 |
| C | -2.75990100 | -2.53949500 | -3.44588700 |
| C | -5.25195500 | -3.02358200 | -3.27587000 |
| H | -3.95129500 | -2.44453700 | -1.67688500 |
| H | -1.91942500 | -1.94914600 | -3.06853100 |
| H | -2.53301100 | -3.60060300 | -3.29655300 |
| H | -2.82852500 | -2.37348900 | -4.52606100 |
| H | -6.18240000 | -2.81445700 | -2.73789300 |
| H | -5.42845300 | -2.81809900 | -4.33676200 |
| H | -5.03488900 | -4.09185400 | -3.17483800 |
| C | -5.24199300 | 2.34094900  | -0.53815300 |
| C | -6.67062600 | 2.91883600  | -0.55938800 |
| C | -4.19048500 | 3.45814600  | -0.39346700 |
| H | -5.16238600 | 1.70951300  | 0.35169400  |
| H | -7.42327200 | 2.12652900  | -0.62117200 |
| H | -6.86030500 | 3.49628300  | 0.35110800  |
| H | -6.82237700 | 3.58728600  | -1.41293300 |
| H | -3.17781700 | 3.04541500  | -0.34721100 |
| H | -4.22969500 | 4.15738000  | -1.23526400 |
| H | -4.37088100 | 4.03157500  | 0.52180600  |
| O | 0.30632600  | -0.65398400 | -2.75399600 |
| O | 2.41794600  | 0.16348500  | -1.87982700 |
| H | 1.25574800  | -1.89840900 | -2.46178700 |
| O | 2.18958400  | -2.18961600 | -2.15511600 |
| H | 2.47898700  | -1.06767700 | -1.84742900 |
| C | 4.32964400  | -4.38208500 | -0.64442300 |
| C | 3.50274200  | -3.33858400 | -0.47027200 |
| H | 4.00798800  | -5.17379100 | -1.32233500 |
| H | 3.76059900  | -2.51169300 | 0.18722300  |
| C | 5.64314600  | -4.60430600 | -0.02711900 |
| C | 6.38270100  | -5.73774200 | -0.40808500 |
| C | 6.20172100  | -3.73606100 | 0.92988900  |
| C | 7.63873200  | -5.99529200 | 0.13869800  |
| H | 5.96532500  | -6.42030100 | -1.14419400 |
| C | 7.45508800  | -3.99271600 | 1.47613700  |
| H | 5.65140700  | -2.85761200 | 1.25271800  |
| C | 8.17992100  | -5.12253400 | 1.08302400  |
| H | 8.19290700  | -6.87598600 | -0.17187700 |
| H | 7.87030900  | -3.31174400 | 2.21340200  |
| H | 9.15753100  | -5.31977400 | 1.51252400  |
| C | 2.17183700  | -3.24692400 | -1.13668300 |
| H | 1.92288700  | -4.17367200 | -1.66034200 |
| H | 1.38314900  | -3.00803400 | -0.41621900 |
| C | 4.97705800  | 1.31098600  | -1.57043000 |

|                                 |             |             |                             |
|---------------------------------|-------------|-------------|-----------------------------|
| C                               | 4.45808200  | 1.13096900  | -2.79321200                 |
| H                               | 4.37847500  | 1.00029700  | -0.71652400                 |
| H                               | 5.01551900  | 1.41146300  | -3.68547300                 |
| C                               | 6.28936100  | 1.88403000  | -1.23361000                 |
| C                               | 7.21667800  | 2.32207900  | -2.19761000                 |
| C                               | 6.64134500  | 2.00287500  | 0.12223900                  |
| C                               | 8.44343300  | 2.85673700  | -1.81601600                 |
| H                               | 6.98163400  | 2.24255700  | -3.25471800                 |
| C                               | 7.87005200  | 2.53832400  | 0.50614700                  |
| H                               | 5.93823600  | 1.66769200  | 0.88115000                  |
| C                               | 8.77707000  | 2.96827800  | -0.46253800                 |
| H                               | 9.14503100  | 3.18695200  | -2.57653300                 |
| H                               | 8.11960900  | 2.61772400  | 1.56034900                  |
| H                               | 9.73603200  | 3.38463200  | -0.16916700                 |
| C                               | 3.11255300  | 0.54090600  | -3.09417600                 |
| H                               | 2.49321400  | 1.25841200  | -3.64428000                 |
| H                               | 3.21093000  | -0.34595500 | -3.73401000                 |
| C                               | 1.59189000  | 1.63166700  | 1.27100200                  |
| C                               | 1.82997900  | 2.65339800  | 1.89354000                  |
| C                               | 2.10867600  | 3.84461700  | 2.61068100                  |
| C                               | 3.02591000  | 3.82797900  | 3.68287800                  |
| C                               | 1.47043500  | 5.05208400  | 2.25491500                  |
| C                               | 3.29590900  | 4.99991500  | 4.38105300                  |
| H                               | 3.51284000  | 2.89672700  | 3.95246200                  |
| C                               | 1.74857800  | 6.21654600  | 2.96201800                  |
| H                               | 0.76738700  | 5.05851700  | 1.42831500                  |
| C                               | 2.65951500  | 6.19233300  | 4.02288000                  |
| H                               | 4.00216600  | 4.98629800  | 5.20500400                  |
| H                               | 1.25769000  | 7.14507500  | 2.68824300                  |
| H                               | 2.87394300  | 7.10457000  | 4.57119000                  |
| C                               | 0.40803000  | 1.72417000  | -2.26277200                 |
| C                               | 1.19769400  | 2.80922500  | -1.83726100                 |
| C                               | -0.78101900 | 1.96086700  | -2.97972100                 |
| C                               | 0.81545400  | 4.11061700  | -2.15612200                 |
| H                               | 2.12182900  | 2.63027400  | -1.30051800                 |
| C                               | -1.15586900 | 3.26347700  | -3.28930600                 |
| H                               | -1.37034700 | 1.11106200  | -3.30499200                 |
| C                               | -0.36071900 | 4.33912800  | -2.87620400                 |
| H                               | 1.44052300  | 4.94499200  | -1.85307200                 |
| H                               | -2.06614000 | 3.44137100  | -3.85283300                 |
| H                               | -0.65467500 | 5.35527900  | -3.12248700                 |
| Zero-point correction=          |             |             | 1.122634 (Hartree/Particle) |
| Thermal correction to Energy=   |             |             | 1.192771                    |
| Thermal correction to Enthalpy= |             |             | 1.193715                    |

|                                              |              |
|----------------------------------------------|--------------|
| Thermal correction to Gibbs Free Energy=     | 0.999441     |
| Sum of electronic and zero-point Energies=   | -2946.805764 |
| Sum of electronic and thermal Energies=      | -2946.735628 |
| Sum of electronic and thermal Enthalpies=    | -2946.734684 |
| Sum of electronic and thermal Free Energies= | -2946.928957 |

### 1-INT3

|    |             |             |             |
|----|-------------|-------------|-------------|
| C  | 1.27299200  | 1.44075600  | 1.39192200  |
| O  | 2.33399200  | 1.27123900  | 0.79061700  |
| C  | 1.28654800  | 1.71235800  | 2.86983800  |
| C  | 2.39899500  | 2.40980000  | 3.37879600  |
| C  | 0.28362100  | 1.27522700  | 3.75311800  |
| C  | 2.48527400  | 2.68940000  | 4.74145500  |
| H  | 3.18645600  | 2.72876200  | 2.70135800  |
| C  | 0.39186900  | 1.53709400  | 5.11803400  |
| C  | 1.48478200  | 2.25265200  | 5.61329700  |
| H  | 3.33865400  | 3.24115100  | 5.12369100  |
| H  | -0.37770300 | 1.18058700  | 5.79601600  |
| C  | -0.01349600 | 1.33887000  | 0.61753500  |
| C  | -0.06417000 | 1.76523300  | -0.82895200 |
| C  | 1.12927600  | 1.83623500  | -1.60576000 |
| C  | 2.07439900  | 2.02074900  | -2.35398700 |
| C  | 3.21203100  | 2.21758100  | -3.18005000 |
| C  | 4.48099500  | 2.42848700  | -2.59792900 |
| C  | 3.07958700  | 2.20038000  | -4.58493100 |
| C  | 5.59218300  | 2.60606900  | -3.41705600 |
| C  | 4.20028400  | 2.37395200  | -5.38981200 |
| H  | 2.09962300  | 2.04584500  | -5.02480300 |
| C  | 5.45613700  | 2.57482900  | -4.80801000 |
| H  | 6.56727500  | 2.76074500  | -2.96661600 |
| H  | 4.09717000  | 2.35567200  | -6.47042400 |
| H  | 6.32900600  | 2.70943300  | -5.43992700 |
| H  | 1.55878400  | 2.46440100  | 6.67589300  |
| H  | -0.56455800 | 0.71429000  | 3.37956300  |
| H  | 4.58286300  | 2.46999100  | -1.51736800 |
| Au | -0.27868000 | -0.82268800 | 0.48411100  |
| C  | -0.44430500 | -2.84486700 | 0.36812900  |
| C  | -0.87529400 | -4.94496100 | -0.33980400 |
| C  | -0.17246000 | -5.04202300 | 0.81777900  |
| H  | 0.16530500  | -5.89926000 | 1.37724000  |
| H  | -1.27387900 | -5.70114000 | -0.99634000 |
| N  | -1.03546900 | -3.59097900 | -0.60205900 |
| N  | 0.08260700  | -3.74514000 | 1.24101100  |



|   |             |             |             |
|---|-------------|-------------|-------------|
| C | -1.74374000 | -3.07796700 | -1.75876500 |
| C | -3.13857900 | -2.90080200 | -1.66218100 |
| C | -1.01277000 | -2.82874600 | -2.93771200 |
| C | -3.80407700 | -2.45118100 | -2.80937700 |
| C | -1.73304300 | -2.37637900 | -4.05017700 |
| C | -3.11159600 | -2.19107900 | -3.98912000 |
| H | -4.87900500 | -2.30782200 | -2.77572500 |
| H | -1.20785900 | -2.17611700 | -4.97852600 |
| H | -3.64953500 | -1.84896600 | -4.86857700 |
| C | 0.80447100  | -3.41871800 | 2.45401000  |
| C | 2.19941800  | -3.23275300 | 2.37871800  |
| C | 0.08120900  | -3.33725000 | 3.66076800  |
| C | 2.86987900  | -2.94195500 | 3.57330100  |
| C | 0.80633500  | -3.04222700 | 4.82182000  |
| C | 2.18373600  | -2.84497100 | 4.78063700  |
| H | 3.94520800  | -2.79590500 | 3.55705700  |
| H | 0.28466600  | -2.97322600 | 5.77135900  |
| H | 2.72611500  | -2.62142500 | 5.69451700  |
| C | 2.98710400  | -3.37080000 | 1.07900100  |
| C | 3.85873000  | -4.64308400 | 1.09928500  |
| C | 3.83666900  | -2.12168200 | 0.77846800  |
| H | 2.27348200  | -3.47588700 | 0.25628900  |
| H | 3.25566100  | -5.54223400 | 1.26174600  |
| H | 4.38900800  | -4.75806400 | 0.14838500  |
| H | 4.60804000  | -4.59753800 | 1.89636000  |
| H | 3.22497800  | -1.21533500 | 0.74870900  |
| H | 4.62214900  | -1.97736600 | 1.52776600  |
| H | 4.32972600  | -2.23385200 | -0.19304300 |
| C | -1.42433800 | -3.57382500 | 3.74657100  |
| C | -2.17149200 | -2.32641200 | 4.25584700  |
| C | -1.74822300 | -4.80618400 | 4.61464000  |
| H | -1.79811200 | -3.78020300 | 2.73935400  |
| H | -1.99111500 | -1.46479400 | 3.60513400  |
| H | -3.25003700 | -2.51330700 | 4.27819500  |
| H | -1.86120000 | -2.05712600 | 5.27084400  |
| H | -1.25084900 | -5.70495200 | 4.23651900  |
| H | -1.42837200 | -4.66215800 | 5.65171900  |
| H | -2.82683800 | -4.99329100 | 4.62250400  |
| C | 0.48906400  | -3.07417800 | -3.05175600 |
| C | 1.24630900  | -1.83834900 | -3.57178700 |
| C | 0.77536800  | -4.30862200 | -3.93143700 |
| H | 0.87725000  | -3.28865700 | -2.05141800 |
| H | 1.06627700  | -0.96156600 | -2.94298700 |
| H | 2.32327500  | -2.03509800 | -3.57933300 |

|   |              |             |             |
|---|--------------|-------------|-------------|
| H | 0.95445200   | -1.58494000 | -4.59613300 |
| H | 0.28336900   | -5.20530200 | -3.54089000 |
| H | 0.42000100   | -4.15540800 | -4.95572200 |
| H | 1.85159600   | -4.50496100 | -3.97621500 |
| C | -3.92645600  | -3.21783900 | -0.39441900 |
| C | -4.67473100  | -4.55972800 | -0.53779400 |
| C | -4.89576500  | -2.08739200 | -0.00292200 |
| H | -3.21201100  | -3.32671400 | 0.42763900  |
| H | -3.99087400  | -5.38800300 | -0.75055600 |
| H | -5.21497400  | -4.79600900 | 0.38479300  |
| H | -5.40606300  | -4.51565400 | -1.35170700 |
| H | -4.39605300  | -1.11562900 | 0.02997800  |
| H | -5.72969500  | -2.00316800 | -0.70732100 |
| H | -5.32849400  | -2.29639100 | 0.98125600  |
| O | -1.15816400  | 2.06976300  | -1.33488000 |
| C | -6.98070900  | 0.77254900  | -2.26754900 |
| C | -6.03297200  | 1.44854600  | -1.60116200 |
| H | -6.66718500  | 0.17783100  | -3.12686500 |
| H | -6.28606500  | 2.06161500  | -0.73767200 |
| C | -8.42540800  | 0.73700000  | -1.99612100 |
| C | -9.25441500  | -0.01467600 | -2.84704300 |
| C | -9.02606900  | 1.41782000  | -0.92030900 |
| C | -10.63080000 | -0.08645700 | -2.63677700 |
| H | -8.81011600  | -0.54611100 | -3.68524400 |
| C | -10.39929500 | 1.34560400  | -0.70807400 |
| H | -8.41544300  | 2.00711100  | -0.24286700 |
| C | -11.20938100 | 0.59390400  | -1.56516500 |
| H | -11.24999300 | -0.67230800 | -3.30975000 |
| H | -10.84272100 | 1.87820300  | 0.12840100  |
| H | -12.28090500 | 0.54149800  | -1.39748300 |
| C | -4.58954300  | 1.46179600  | -1.99631300 |
| H | -4.31839300  | 2.45181800  | -2.39937700 |
| H | -4.40466100  | 0.72407900  | -2.78847900 |
| O | -3.77604400  | 1.17703100  | -0.84650500 |
| H | -2.84129500  | 1.27758400  | -1.11119000 |
| C | 7.89032500   | 1.28851000  | -0.19825800 |
| C | 6.65664900   | 1.07828900  | 0.28621800  |
| H | 8.46588900   | 2.11169700  | 0.22753700  |
| H | 6.04434500   | 0.25982800  | -0.09213400 |
| C | 8.59395700   | 0.52519600  | -1.24075000 |
| C | 7.97703000   | -0.47995800 | -2.00973500 |
| C | 9.94776400   | 0.81069600  | -1.49168500 |
| C | 8.69196400   | -1.17509800 | -2.98064700 |
| H | 6.92782100   | -0.71245600 | -1.85402700 |

|    |             |             |             |
|----|-------------|-------------|-------------|
| C  | 10.66528700 | 0.11390900  | -2.46309700 |
| H  | 10.44083300 | 1.58642400  | -0.91098400 |
| C  | 10.04018200 | -0.88398800 | -3.21136600 |
| H  | 8.19661300  | -1.94604800 | -3.56431000 |
| H  | 11.71119200 | 0.35079500  | -2.63502400 |
| H  | 10.59485600 | -1.42864500 | -3.96960800 |
| C  | 6.03056900  | 1.91796400  | 1.36378200  |
| H  | 6.72539700  | 2.70427200  | 1.67582900  |
| H  | 5.81891700  | 1.29896000  | 2.25111800  |
| O  | 4.83707600  | 2.58123600  | 0.93384800  |
| H  | 4.11617200  | 1.93122200  | 0.87600400  |
| C  | -2.73515400 | 3.45264000  | 0.77077900  |
| C  | -3.13153900 | 4.78750800  | 0.73501900  |
| C  | -2.25651900 | 5.80229600  | 1.12236000  |
| C  | -0.97926800 | 5.44569400  | 1.55947800  |
| C  | -0.60512900 | 4.10760900  | 1.61233800  |
| H  | -2.55870700 | 6.84244200  | 1.08440800  |
| H  | -3.33204900 | 2.60806100  | 0.41152100  |
| H  | 0.34982800  | 3.76576300  | 1.98505300  |
| Cl | 0.15082200  | 6.65141200  | 2.06866900  |
| Cl | -4.72254100 | 5.16881000  | 0.17310700  |
| N  | -1.49466500 | 3.18021200  | 1.20989900  |
| O  | -1.20453500 | 1.80255000  | 1.31656100  |

|                                              |                             |
|----------------------------------------------|-----------------------------|
| Zero-point correction=                       | 1.203924 (Hartree/Particle) |
| Thermal correction to Energy=                | 1.284178                    |
| Thermal correction to Enthalpy=              | 1.285122                    |
| Thermal correction to Gibbs Free Energy=     | 1.066669                    |
| Sum of electronic and zero-point Energies=   | -4189.437789                |
| Sum of electronic and thermal Energies=      | -4189.357536                |
| Sum of electronic and thermal Enthalpies=    | -4189.356592                |
| Sum of electronic and thermal Free Energies= | -4189.575044                |

### 1-TS3

|   |            |             |             |
|---|------------|-------------|-------------|
| C | 1.44856000 | -0.88940100 | -0.81154300 |
| O | 1.43718100 | -0.17938000 | -1.92566600 |
| C | 1.58535100 | -0.07351700 | 2.89989900  |
| C | 2.75409200 | 0.70315500  | 2.82919100  |
| C | 0.96223800 | -0.25941100 | 4.14428800  |
| C | 3.27482700 | 1.29136400  | 3.98271800  |
| H | 3.26685400 | 0.81401200  | 1.88099800  |
| C | 1.46979900 | 0.35317600  | 5.28882700  |
| C | 2.62821400 | 1.12962800  | 5.21052100  |
| H | 4.19095800 | 1.87221800  | 3.92438300  |

|    |             |             |             |
|----|-------------|-------------|-------------|
| H  | 0.97092900  | 0.21390100  | 6.24328100  |
| C  | 0.75930900  | -0.18438800 | 0.37712400  |
| C  | 1.01565900  | -0.83326200 | 1.73066900  |
| C  | 1.18104300  | -2.30856900 | -0.97369100 |
| C  | 1.07772700  | -3.49074100 | -1.23175000 |
| C  | 0.97980000  | -4.89129300 | -1.48442600 |
| C  | 1.05825000  | -5.80804700 | -0.41740200 |
| C  | 0.82857700  | -5.37534700 | -2.79885700 |
| C  | 0.98815600  | -7.17665200 | -0.66546700 |
| C  | 0.75162000  | -6.74571500 | -3.03562100 |
| H  | 0.77889600  | -4.66955700 | -3.62174800 |
| C  | 0.83222500  | -7.64881900 | -1.97192400 |
| H  | 1.05825600  | -7.87760400 | 0.16112700  |
| H  | 0.63739400  | -7.11111400 | -4.05181100 |
| H  | 0.77974500  | -8.71684000 | -2.16116500 |
| H  | 3.03205300  | 1.59683100  | 6.10385600  |
| H  | 0.08096300  | -0.88988600 | 4.20118200  |
| H  | 1.17335700  | -5.43195800 | 0.59375900  |
| Au | -1.38040000 | -0.29461400 | 0.19162800  |
| C  | -3.42040100 | -0.54706500 | 0.19902900  |
| C  | -5.65664500 | -0.20355400 | 0.37179000  |
| C  | -5.44919700 | -1.54307500 | 0.36608300  |
| H  | -6.13695900 | -2.37103700 | 0.42232800  |
| H  | -6.56132100 | 0.37903700  | 0.43551400  |
| N  | -4.40600400 | 0.39315900  | 0.26582900  |
| N  | -4.07875600 | -1.73811900 | 0.26099100  |
| C  | -4.23024700 | 1.82466700  | 0.17752400  |
| C  | -3.96035300 | 2.55163300  | 1.35406300  |
| C  | -4.41090400 | 2.43670700  | -1.08018400 |
| C  | -3.83556600 | 3.94178100  | 1.23256400  |
| C  | -4.27190500 | 3.82930700  | -1.14115500 |
| C  | -3.98518600 | 4.57441700  | 0.00046700  |
| H  | -3.63912300 | 4.53758700  | 2.11846200  |
| H  | -4.41022200 | 4.33619600  | -2.09127200 |
| H  | -3.90417000 | 5.65604600  | -0.06484700 |
| C  | -3.49048000 | -3.06246700 | 0.20302500  |
| C  | -3.30714000 | -3.65819200 | -1.06074400 |
| C  | -3.20951900 | -3.72520700 | 1.41439200  |
| C  | -2.82356300 | -4.97165400 | -1.08331600 |
| C  | -2.73381800 | -5.03852300 | 1.32764100  |
| C  | -2.54485100 | -5.65699200 | 0.09527400  |
| H  | -2.66296400 | -5.46458200 | -2.03659700 |
| H  | -2.50995800 | -5.58344900 | 2.23890000  |
| H  | -2.17034100 | -6.67465400 | 0.05109700  |

|   |             |             |             |
|---|-------------|-------------|-------------|
| C | -3.62995200 | -2.94821900 | -2.37250700 |
| C | -4.80266600 | -3.63261000 | -3.10250300 |
| C | -2.39185300 | -2.84437900 | -3.28349100 |
| H | -3.94276900 | -1.92574500 | -2.14073300 |
| H | -5.70010400 | -3.66898200 | -2.47639100 |
| H | -5.05136600 | -3.08988400 | -4.02055100 |
| H | -4.55202100 | -4.66108000 | -3.38184900 |
| H | -1.56196500 | -2.34652100 | -2.77342500 |
| H | -2.04406400 | -3.83295800 | -3.60033700 |
| H | -2.63458100 | -2.27487000 | -4.18705100 |
| C | -3.43364200 | -3.08373800 | 2.78033000  |
| C | -2.20302600 | -3.22198000 | 3.69658000  |
| C | -4.69362300 | -3.65794800 | 3.46016400  |
| H | -3.59972600 | -2.01239100 | 2.62743500  |
| H | -1.29566500 | -2.86102300 | 3.20457500  |
| H | -2.35941800 | -2.64850400 | 4.61701500  |
| H | -2.03264000 | -4.26216600 | 3.99311300  |
| H | -5.58872200 | -3.51279300 | 2.84654900  |
| H | -4.58661900 | -4.73276600 | 3.64020300  |
| H | -4.86456800 | -3.17190300 | 4.42652600  |
| C | -4.78713800 | 1.65304600  | -2.33585700 |
| C | -3.71064400 | 1.76122000  | -3.43065400 |
| C | -6.16629000 | 2.08865300  | -2.87061600 |
| H | -4.86431900 | 0.59602000  | -2.06798100 |
| H | -2.74336200 | 1.39515000  | -3.07368100 |
| H | -3.99790300 | 1.16388300  | -4.30201400 |
| H | -3.57996600 | 2.79465000  | -3.76713300 |
| H | -6.94503200 | 1.98529700  | -2.10842200 |
| H | -6.15995100 | 3.13337200  | -3.19818400 |
| H | -6.45016500 | 1.47387000  | -3.73064200 |
| C | -3.86328300 | 1.89684500  | 2.72914300  |
| C | -5.02077900 | 2.35502900  | 3.63955900  |
| C | -2.49954000 | 2.14867200  | 3.39810300  |
| H | -3.95951100 | 0.81550600  | 2.59848500  |
| H | -5.99442000 | 2.14474800  | 3.18606600  |
| H | -4.97612300 | 1.83473900  | 4.60168300  |
| H | -4.97298600 | 3.43039500  | 3.84011900  |
| H | -1.68349200 | 1.75087400  | 2.78660600  |
| H | -2.31956100 | 3.21614300  | 3.56535700  |
| H | -2.45914900 | 1.65204800  | 4.37271800  |
| O | 0.68185100  | -2.00192600 | 1.89017300  |
| C | 0.33993500  | 2.38993500  | -1.27429800 |
| C | -0.21721100 | 3.60153400  | -1.67233700 |
| C | -0.43317900 | 4.62609600  | -0.75197100 |

|    |             |             |             |
|----|-------------|-------------|-------------|
| C  | -0.08288900 | 4.40630700  | 0.58168900  |
| C  | 0.47670100  | 3.19700300  | 0.96658700  |
| H  | -0.84919300 | 5.57530300  | -1.06519800 |
| H  | 0.59670600  | 1.52935700  | -1.89640400 |
| H  | 0.80190900  | 2.94695000  | 1.96697000  |
| Cl | -0.32287900 | 5.63767200  | 1.77509900  |
| Cl | -0.58777000 | 3.83803200  | -3.34652300 |
| N  | 0.66610000  | 2.25203600  | 0.02378700  |
| O  | 1.39008500  | 1.16422400  | 0.42747200  |
| C  | 6.26397300  | -2.17813300 | 0.03659900  |
| C  | 5.16812400  | -1.68536800 | 0.63691200  |
| H  | 6.11638500  | -2.86171000 | -0.80057000 |
| H  | 5.25013500  | -0.98560000 | 1.46617300  |
| C  | 7.67013400  | -1.90799600 | 0.36747100  |
| C  | 8.06741000  | -1.17895500 | 1.50441300  |
| C  | 8.67206600  | -2.40040000 | -0.48735000 |
| C  | 9.41386100  | -0.94306200 | 1.76446000  |
| H  | 7.31907900  | -0.80672100 | 2.19757000  |
| C  | 10.02122400 | -2.16386000 | -0.22806500 |
| H  | 8.38451600  | -2.97340900 | -1.36544800 |
| C  | 10.39739300 | -1.43214200 | 0.89875900  |
| H  | 9.70080500  | -0.38219900 | 2.64934200  |
| H  | 10.77736200 | -2.55345300 | -0.90325600 |
| H  | 11.44731800 | -1.24921400 | 1.10683800  |
| C  | 3.77581700  | -2.04793400 | 0.22078900  |
| H  | 3.18086600  | -2.39142100 | 1.07247700  |
| H  | 3.78867800  | -2.84798600 | -0.52759800 |
| O  | 3.14469800  | -0.86047000 | -0.32660300 |
| H  | 3.66790500  | -0.61930900 | -1.48532700 |
| C  | 3.74667500  | 3.15484000  | -2.71309600 |
| C  | 4.07167900  | 1.97268700  | -2.16761400 |
| H  | 3.69238200  | 3.21975000  | -3.80037500 |
| H  | 4.11341100  | 1.84712300  | -1.08722000 |
| C  | 3.44306200  | 4.40784000  | -2.00278700 |
| C  | 2.88052700  | 5.47876200  | -2.72062800 |
| C  | 3.69783000  | 4.59297600  | -0.62936700 |
| C  | 2.56308100  | 6.68245100  | -2.09083900 |
| H  | 2.69452400  | 5.36273300  | -3.78519400 |
| C  | 3.38348400  | 5.79545100  | -0.00055000 |
| H  | 4.17480500  | 3.80194000  | -0.05841700 |
| C  | 2.81025200  | 6.84511300  | -0.72634600 |
| H  | 2.13763100  | 7.49750800  | -2.66922100 |
| H  | 3.60524900  | 5.92471000  | 1.05505600  |
| H  | 2.58056700  | 7.78643300  | -0.23619900 |

|                                              |            |             |                             |
|----------------------------------------------|------------|-------------|-----------------------------|
| C                                            | 4.44498300 | 0.76283100  | -2.97297600                 |
| H                                            | 5.50236100 | 0.51369000  | -2.82211500                 |
| H                                            | 4.29138200 | 0.93566900  | -4.04264500                 |
| O                                            | 3.70023300 | -0.41842800 | -2.60635700                 |
| H                                            | 2.57293700 | -0.27160700 | -2.52582300                 |
| Zero-point correction=                       |            |             | 1.198741 (Hartree/Particle) |
| Thermal correction to Energy=                |            |             | 1.276630                    |
| Thermal correction to Enthalpy=              |            |             | 1.277575                    |
| Thermal correction to Gibbs Free Energy=     |            |             | 1.069627                    |
| Sum of electronic and zero-point Energies=   |            |             | -4189.396579                |
| Sum of electronic and thermal Energies=      |            |             | -4189.318689                |
| Sum of electronic and thermal Enthalpies=    |            |             | -4189.317745                |
| Sum of electronic and thermal Free Energies= |            |             | -4189.525692                |

### 1-TS3-1

|   |             |             |             |
|---|-------------|-------------|-------------|
| C | 1.14625600  | -1.34425100 | -1.59806900 |
| O | 1.23168600  | -0.43420600 | -2.56457900 |
| C | 0.44822300  | -2.61800500 | -2.06292500 |
| C | 0.42971800  | -2.84447600 | -3.44997600 |
| C | -0.10192300 | -3.59115400 | -1.21690800 |
| C | -0.10294900 | -4.01941600 | -3.97602800 |
| H | 0.84139900  | -2.08634900 | -4.10493900 |
| C | -0.63566100 | -4.76705100 | -1.74812800 |
| C | -0.63416300 | -4.99004900 | -3.12450100 |
| H | -0.09823100 | -4.17797700 | -5.05067500 |
| H | -1.04699800 | -5.51407500 | -1.07657500 |
| C | 0.75021300  | -0.67591800 | -0.23050100 |
| C | 1.29942500  | -1.32792100 | 1.02967800  |
| C | 1.95126100  | -0.48031800 | 2.01117800  |
| C | 2.56292600  | 0.08764000  | 2.89911000  |
| C | 3.26613100  | 0.72848400  | 3.96037300  |
| C | 3.91895500  | 1.96087800  | 3.75507600  |
| C | 3.31833000  | 0.12630600  | 5.23434400  |
| C | 4.60319000  | 2.57462700  | 4.79996300  |
| C | 4.00033000  | 0.75052800  | 6.27460700  |
| H | 2.82261400  | -0.82614100 | 5.38993800  |
| C | 4.64291200  | 1.97319400  | 6.06092600  |
| H | 5.10931500  | 3.52038000  | 4.63239500  |
| H | 4.03587900  | 0.28117300  | 7.25285600  |
| H | 5.17783000  | 2.45421500  | 6.87412900  |
| H | -1.04141100 | -5.91141200 | -3.53092300 |
| H | -0.06988700 | -3.45097000 | -0.14449300 |
| H | 3.89747800  | 2.41833900  | 2.77059000  |

|    |             |             |             |
|----|-------------|-------------|-------------|
| Au | -1.36044200 | -0.55104600 | 0.13612200  |
| C  | -3.36418700 | -0.52273200 | 0.63017100  |
| C  | -5.32442100 | -0.03081000 | 1.66301900  |
| C  | -5.56045100 | -1.05537500 | 0.80877200  |
| H  | -6.46060100 | -1.60360900 | 0.58378700  |
| H  | -5.97712200 | 0.50170700  | 2.33516300  |
| N  | -3.97833200 | 0.28970600  | 1.54029400  |
| N  | -4.35306900 | -1.34982000 | 0.18880600  |
| C  | -3.36881500 | 1.38120400  | 2.27013300  |
| C  | -2.60918700 | 1.09131200  | 3.42365100  |
| C  | -3.62624800 | 2.69638900  | 1.83127000  |
| C  | -2.05457800 | 2.17814700  | 4.11103800  |
| C  | -3.05308100 | 3.74226500  | 2.56623400  |
| C  | -2.26796000 | 3.48768000  | 3.68690400  |
| H  | -1.46183000 | 1.99788000  | 5.00122900  |
| H  | -3.23724600 | 4.76889600  | 2.26500500  |
| H  | -1.83599700 | 4.31352200  | 4.24450600  |
| C  | -4.24228000 | -2.43363600 | -0.76775700 |
| C  | -4.27331700 | -2.13309200 | -2.14381100 |
| C  | -4.22231200 | -3.75270100 | -0.26939900 |
| C  | -4.28391300 | -3.21435300 | -3.03345700 |
| C  | -4.24835600 | -4.79096200 | -1.20748900 |
| C  | -4.28152800 | -4.52735200 | -2.57369600 |
| H  | -4.30765400 | -3.02289800 | -4.10148600 |
| H  | -4.24398100 | -5.81979000 | -0.86112100 |
| H  | -4.30484200 | -5.34887400 | -3.28337300 |
| C  | -4.32925800 | -0.70889400 | -2.68776100 |
| C  | -5.66698400 | -0.43718000 | -3.40455400 |
| C  | -3.13267600 | -0.40732700 | -3.61042800 |
| H  | -4.26537600 | -0.01685700 | -1.84293900 |
| H  | -6.52016200 | -0.60727000 | -2.74008800 |
| H  | -5.70974800 | 0.60007800  | -3.75320500 |
| H  | -5.79113200 | -1.08616700 | -4.27740700 |
| H  | -2.18128700 | -0.60141100 | -3.10597200 |
| H  | -3.15731100 | -1.02119400 | -4.51656300 |
| H  | -3.15304000 | 0.64207500  | -3.92416100 |
| C  | -4.19080600 | -4.08112600 | 1.22182200  |
| C  | -2.95388500 | -4.92028300 | 1.59619300  |
| C  | -5.48771500 | -4.78390500 | 1.67060600  |
| H  | -4.11878200 | -3.14215400 | 1.77867500  |
| H  | -2.02739300 | -4.41265300 | 1.31310900  |
| H  | -2.92932000 | -5.09492100 | 2.67681000  |
| H  | -2.96776900 | -5.89971000 | 1.10676100  |
| H  | -6.37361500 | -4.17987800 | 1.44931700  |



|    |             |             |             |
|----|-------------|-------------|-------------|
| H  | -5.61286800 | -5.74874300 | 1.16848900  |
| H  | -5.46704700 | -4.97087000 | 2.74912400  |
| C  | -4.53875800 | 3.01529600  | 0.64801000  |
| C  | -3.85081400 | 3.89274200  | -0.41216100 |
| C  | -5.84899600 | 3.67292400  | 1.12910400  |
| H  | -4.80473700 | 2.07629400  | 0.15486900  |
| H  | -2.95500600 | 3.40425900  | -0.80455300 |
| H  | -4.53055600 | 4.07334200  | -1.25082000 |
| H  | -3.56174600 | 4.86904200  | -0.00864700 |
| H  | -6.37409200 | 3.04541700  | 1.85595200  |
| H  | -5.65598400 | 4.63855400  | 1.60782300  |
| H  | -6.52245600 | 3.84688100  | 0.28375500  |
| C  | -2.46411200 | -0.32603800 | 3.97252300  |
| C  | -3.56238400 | -0.60062800 | 5.02314300  |
| C  | -1.07214600 | -0.61662200 | 4.55762400  |
| H  | -2.61353500 | -1.02673300 | 3.14617800  |
| H  | -4.56605400 | -0.46788300 | 4.60726200  |
| H  | -3.48485900 | -1.62701000 | 5.39621400  |
| H  | -3.46251100 | 0.07743400  | 5.87737300  |
| H  | -0.27687200 | -0.38770700 | 3.84323600  |
| H  | -0.88430300 | -0.04710800 | 5.47403800  |
| H  | -0.99682500 | -1.67693400 | 4.81766500  |
| O  | 1.17556100  | -2.52489900 | 1.27023100  |
| C  | 0.20439600  | 1.99593600  | -1.65920900 |
| C  | -0.31354600 | 3.26464800  | -1.90500100 |
| C  | -0.19215100 | 4.28155600  | -0.95914500 |
| C  | 0.42490500  | 3.98552400  | 0.25900500  |
| C  | 0.91864000  | 2.71201800  | 0.50134300  |
| H  | -0.56147900 | 5.27889900  | -1.16463400 |
| H  | 0.24697400  | 1.14418900  | -2.34132000 |
| H  | 1.40593000  | 2.38618500  | 1.41022200  |
| Cl | 0.60413100  | 5.20403400  | 1.47658500  |
| Cl | -1.08082200 | 3.56839000  | -3.42658500 |
| N  | 0.80567700  | 1.78616300  | -0.47364800 |
| O  | 1.49210800  | 0.62749200  | -0.24413100 |
| C  | 5.30848700  | -3.64768900 | -0.02037000 |
| C  | 4.65707500  | -3.22826900 | -1.11696900 |
| H  | 4.70705700  | -3.93289400 | 0.84333900  |
| H  | 5.20220200  | -2.91844400 | -2.00737300 |
| C  | 6.75944700  | -3.77763500 | 0.16999200  |
| C  | 7.69441300  | -3.57157000 | -0.86220800 |
| C  | 7.24394600  | -4.12866700 | 1.44241000  |
| C  | 9.05893700  | -3.70245500 | -0.62365400 |
| H  | 7.35238500  | -3.31934400 | -1.86138900 |

|                                              |             |             |                             |
|----------------------------------------------|-------------|-------------|-----------------------------|
| C                                            | 8.61084500  | -4.25997700 | 1.68242300                  |
| H                                            | 6.53583200  | -4.29869600 | 2.24968500                  |
| C                                            | 9.52429700  | -4.04589000 | 0.64978800                  |
| H                                            | 9.76426800  | -3.54318600 | -1.43418000                 |
| H                                            | 8.96158800  | -4.53240700 | 2.67353800                  |
| H                                            | 10.58976300 | -4.15111200 | 0.83111500                  |
| C                                            | 3.16416200  | -3.18062600 | -1.20576900                 |
| H                                            | 2.69818500  | -3.62252100 | -0.32325700                 |
| H                                            | 2.80519300  | -3.70839100 | -2.09644600                 |
| O                                            | 2.74597200  | -1.78509900 | -1.27961800                 |
| H                                            | 3.37975100  | -1.13252600 | -2.12426200                 |
| C                                            | 3.67153400  | 3.18352700  | -2.33364100                 |
| C                                            | 3.84889600  | 2.07165900  | -3.06490400                 |
| H                                            | 3.88906100  | 3.12289100  | -1.26566800                 |
| H                                            | 3.68251100  | 2.06949800  | -4.14068700                 |
| C                                            | 3.24142900  | 4.51251300  | -2.79456900                 |
| C                                            | 3.24167300  | 5.57934800  | -1.87741600                 |
| C                                            | 2.81803800  | 4.77280500  | -4.11205600                 |
| C                                            | 2.84150900  | 6.86015200  | -2.25798500                 |
| H                                            | 3.57794600  | 5.40213200  | -0.85832500                 |
| C                                            | 2.41651100  | 6.05033000  | -4.49214400                 |
| H                                            | 2.80333800  | 3.97234100  | -4.84533300                 |
| C                                            | 2.42619100  | 7.10061200  | -3.56845600                 |
| H                                            | 2.86325400  | 7.67025000  | -1.53478100                 |
| H                                            | 2.09781400  | 6.23043800  | -5.51460900                 |
| H                                            | 2.11838100  | 8.09681600  | -3.87132900                 |
| C                                            | 4.34428700  | 0.78058400  | -2.48713800                 |
| H                                            | 4.32283900  | 0.81241700  | -1.39027500                 |
| H                                            | 5.38027800  | 0.59623400  | -2.79782700                 |
| O                                            | 3.57475400  | -0.34043200 | -2.96832500                 |
| H                                            | 2.45306700  | -0.19758300 | -2.90843300                 |
| Zero-point correction=                       |             |             | 1.198568 (Hartree/Particle) |
| Thermal correction to Energy=                |             |             | 1.276440                    |
| Thermal correction to Enthalpy=              |             |             | 1.277384                    |
| Thermal correction to Gibbs Free Energy=     |             |             | 1.068407                    |
| Sum of electronic and zero-point Energies=   |             |             | -4189.389503                |
| Sum of electronic and thermal Energies=      |             |             | -4189.311631                |
| Sum of electronic and thermal Enthalpies=    |             |             | -4189.310687                |
| Sum of electronic and thermal Free Energies= |             |             | -4189.519664                |

#### 1-INT4

|   |            |            |            |
|---|------------|------------|------------|
| C | 0.21025300 | 2.31884500 | 1.60154200 |
| O | 0.01922100 | 1.99951600 | 2.77858600 |

|    |             |             |             |
|----|-------------|-------------|-------------|
| C  | -0.26651100 | 3.67910500  | 1.17585100  |
| C  | -1.19364800 | 4.28802200  | 2.04874300  |
| C  | 0.18882200  | 4.41205700  | 0.06666700  |
| C  | -1.65881400 | 5.57654600  | 1.81544600  |
| H  | -1.52771600 | 3.73214900  | 2.91663500  |
| C  | -0.27043900 | 5.71172800  | -0.15427300 |
| C  | -1.19382500 | 6.29716000  | 0.71101800  |
| H  | -2.37540700 | 6.02409400  | 2.49770700  |
| H  | 0.10520200  | 6.26873400  | -1.00739500 |
| C  | 0.79469600  | 1.20921000  | 0.70275600  |
| C  | 1.77997600  | 1.50154800  | -0.48391400 |
| C  | 2.87975800  | 2.38855900  | -0.06635000 |
| C  | 3.77703600  | 3.10054200  | 0.33358000  |
| C  | 4.82452200  | 3.95132300  | 0.80410900  |
| C  | 4.74911000  | 4.52406500  | 2.08854500  |
| C  | 5.93985700  | 4.22827300  | -0.00966400 |
| C  | 5.76970500  | 5.35438200  | 2.54409800  |
| C  | 6.95558800  | 5.05920200  | 0.45563200  |
| H  | 5.99786600  | 3.79028800  | -1.00092300 |
| C  | 6.87375200  | 5.62336500  | 1.73120100  |
| H  | 5.70366800  | 5.79339600  | 3.53498400  |
| H  | 7.81201700  | 5.26830000  | -0.17816400 |
| H  | 7.66748100  | 6.27154100  | 2.09014600  |
| H  | -1.54600800 | 7.30893900  | 0.53155300  |
| H  | 0.89965400  | 3.98768100  | -0.62422600 |
| H  | 3.88823200  | 4.31366200  | 2.71493200  |
| Au | -0.97479000 | 0.23899700  | -0.02498500 |
| C  | -2.72863900 | -0.50719100 | -0.80995500 |
| C  | -4.71678400 | -1.54714900 | -1.11694800 |
| C  | -4.50284400 | -0.75366600 | -2.19651700 |
| H  | -5.09594000 | -0.57627600 | -3.07905500 |
| H  | -5.53295000 | -2.20538900 | -0.86662500 |
| N  | -3.61898600 | -1.38924400 | -0.27913000 |
| N  | -3.28285000 | -0.12341100 | -1.99315700 |
| C  | -3.45725900 | -2.12188000 | 0.95873400  |
| C  | -2.98478000 | -3.44832800 | 0.88519000  |
| C  | -3.82890500 | -1.50435500 | 2.17012200  |
| C  | -2.87061900 | -4.15576100 | 2.08869900  |
| C  | -3.69396400 | -2.26250000 | 3.34057500  |
| C  | -3.22087200 | -3.57141300 | 3.30334900  |
| H  | -2.51972700 | -5.18313600 | 2.07038100  |
| H  | -3.97703300 | -1.82390800 | 4.29204000  |
| H  | -3.13825200 | -4.14245500 | 4.22343200  |
| C  | -2.69426900 | 0.82068200  | -2.92067100 |

|   |             |             |             |
|---|-------------|-------------|-------------|
| C | -3.11460600 | 2.16491700  | -2.86616400 |
| C | -1.74686800 | 0.34673900  | -3.85225200 |
| C | -2.51996600 | 3.05669400  | -3.76790900 |
| C | -1.18209000 | 1.28767200  | -4.72279000 |
| C | -1.55837500 | 2.62801700  | -4.67846800 |
| H | -2.81415500 | 4.10119500  | -3.75368300 |
| H | -0.44725100 | 0.96407200  | -5.45336300 |
| H | -1.10754000 | 3.33870100  | -5.36452100 |
| C | -4.18909200 | 2.66173400  | -1.90341300 |
| C | -5.45922000 | 3.08439600  | -2.66979200 |
| C | -3.67905300 | 3.80237200  | -1.00480300 |
| H | -4.46729600 | 1.83431200  | -1.24362800 |
| H | -5.85340800 | 2.26769500  | -3.28335400 |
| H | -6.24236400 | 3.39013900  | -1.96869200 |
| H | -5.25891000 | 3.93067100  | -3.33490200 |
| H | -2.79673300 | 3.49990800  | -0.43489900 |
| H | -3.41215900 | 4.69004700  | -1.58653600 |
| H | -4.45926200 | 4.09762400  | -0.29575700 |
| C | -1.36739500 | -1.12663500 | -3.97525000 |
| C | 0.14562700  | -1.35678500 | -3.80445300 |
| C | -1.86799800 | -1.71020400 | -5.31247300 |
| H | -1.86793100 | -1.67668700 | -3.17315400 |
| H | 0.50165400  | -0.98624000 | -2.83822400 |
| H | 0.37169500  | -2.42695400 | -3.86180400 |
| H | 0.71927300  | -0.85868100 | -4.59325500 |
| H | -2.94956800 | -1.58527400 | -5.42466100 |
| H | -1.38750100 | -1.22138000 | -6.16615700 |
| H | -1.64229800 | -2.77999100 | -5.37041200 |
| C | -4.40532400 | -0.09363700 | 2.24393100  |
| C | -3.61065600 | 0.81032200  | 3.20516600  |
| C | -5.89871300 | -0.13338900 | 2.62873900  |
| H | -4.33663600 | 0.35676000  | 1.24966100  |
| H | -2.55462700 | 0.87113100  | 2.92499600  |
| H | -4.02186800 | 1.82474900  | 3.18824600  |
| H | -3.66807700 | 0.45338700  | 4.23881100  |
| H | -6.47982800 | -0.73743100 | 1.92466600  |
| H | -6.04202100 | -0.55776500 | 3.62795100  |
| H | -6.31689700 | 0.87825800  | 2.63307600  |
| C | -2.61260100 | -4.12715000 | -0.43079900 |
| C | -3.46091300 | -5.38959100 | -0.68022000 |
| C | -1.10794000 | -4.44896300 | -0.49134300 |
| H | -2.82322000 | -3.43157200 | -1.24778200 |
| H | -4.53163200 | -5.16360300 | -0.66439500 |
| H | -3.22004200 | -5.82063200 | -1.65713300 |

|                                            |             |             |                             |
|--------------------------------------------|-------------|-------------|-----------------------------|
| H                                          | -3.27348800 | -6.15915400 | 0.07537800                  |
| H                                          | -0.50667200 | -3.54231900 | -0.37056900                 |
| H                                          | -0.81674300 | -5.15801700 | 0.29063200                  |
| H                                          | -0.85192400 | -4.89905300 | -1.45597200                 |
| O                                          | 1.13808700  | 2.10632100  | -1.57926000                 |
| C                                          | 0.67661900  | -0.84508000 | 3.24029200                  |
| C                                          | 0.49989500  | -2.10377500 | 3.80351400                  |
| C                                          | 0.99562200  | -3.24023500 | 3.16053800                  |
| C                                          | 1.66413100  | -3.08569100 | 1.94347700                  |
| C                                          | 1.83312600  | -1.82080700 | 1.39107600                  |
| H                                          | 0.87785600  | -4.22173700 | 3.60463600                  |
| H                                          | 0.34528700  | 0.11085700  | 3.63568100                  |
| H                                          | 2.33805800  | -1.58383300 | 0.46098100                  |
| Cl                                         | 2.32968800  | -4.45505500 | 1.12150800                  |
| Cl                                         | -0.30040600 | -2.23410900 | 5.33193900                  |
| N                                          | 1.33730400  | -0.76741000 | 2.06912000                  |
| O                                          | 1.69594400  | 0.48049900  | 1.64003500                  |
| C                                          | 4.39541700  | -2.03489400 | -2.27173200                 |
| C                                          | 4.25466100  | -0.91256000 | -1.54729800                 |
| H                                          | 3.75551000  | -2.15284500 | -3.14738800                 |
| H                                          | 4.85555800  | -0.74046400 | -0.65580800                 |
| C                                          | 5.32044300  | -3.15189900 | -2.03268100                 |
| C                                          | 6.32848600  | -3.12002600 | -1.05021000                 |
| C                                          | 5.19817000  | -4.31056000 | -2.81986900                 |
| C                                          | 7.16997200  | -4.21164900 | -0.85835600                 |
| H                                          | 6.46620500  | -2.23051900 | -0.44292200                 |
| C                                          | 6.04048000  | -5.40475000 | -2.62800200                 |
| H                                          | 4.43225700  | -4.34868000 | -3.59072000                 |
| C                                          | 7.02903900  | -5.35994800 | -1.64430700                 |
| H                                          | 7.94583600  | -4.16563600 | -0.09966700                 |
| H                                          | 5.92850700  | -6.28842900 | -3.24929400                 |
| H                                          | 7.69125800  | -6.20746700 | -1.49537500                 |
| C                                          | 3.28687400  | 0.17539900  | -1.88956100                 |
| H                                          | 2.81173400  | -0.00288900 | -2.85996700                 |
| H                                          | 3.79086100  | 1.14740100  | -1.92541000                 |
| O                                          | 2.26543300  | 0.21059500  | -0.86043400                 |
| H                                          | 0.35835500  | 1.56833500  | -1.79768900                 |
| Zero-point correction=                     |             |             | 1.036883 (Hartree/Particle) |
| Thermal correction to Energy=              |             |             | 1.104709                    |
| Thermal correction to Enthalpy=            |             |             | 1.105653                    |
| Thermal correction to Gibbs Free Energy=   |             |             | 0.921356                    |
| Sum of electronic and zero-point Energies= |             |             | -3765.391493                |
| Sum of electronic and thermal Energies=    |             |             | -3765.323668                |
| Sum of electronic and thermal Enthalpies=  |             |             | -3765.322723                |

Sum of electronic and thermal Free Energies= -3765.507020

1-TS4

|    |             |             |             |
|----|-------------|-------------|-------------|
| C  | 0.64503100  | -0.05511200 | -2.08916900 |
| O  | 1.23048700  | 1.00270600  | -2.30035400 |
| C  | -0.10942500 | -0.72833900 | -3.18753300 |
| C  | 0.22147700  | -0.33637500 | -4.49786600 |
| C  | -1.12232300 | -1.68101900 | -2.98894300 |
| C  | -0.44025200 | -0.89415900 | -5.58626200 |
| H  | 0.99928100  | 0.40578100  | -4.63834300 |
| C  | -1.79194500 | -2.22681000 | -4.08287400 |
| C  | -1.45054100 | -1.83914300 | -5.38042400 |
| H  | -0.17389300 | -0.59129100 | -6.59420900 |
| H  | -2.58671500 | -2.94697400 | -3.91767400 |
| C  | 0.65545900  | -0.66726100 | -0.71150000 |
| C  | 1.80308200  | -1.61164900 | -0.36748100 |
| C  | 1.35243200  | -2.89183200 | -0.93863900 |
| C  | 1.02065000  | -3.94375600 | -1.45178200 |
| C  | 0.64621500  | -5.17971100 | -2.05045100 |
| C  | 0.29216400  | -6.28166600 | -1.24486200 |
| C  | 0.63838200  | -5.31471500 | -3.45408800 |
| C  | -0.06026500 | -7.49098800 | -1.83605000 |
| C  | 0.28024600  | -6.52818100 | -4.03347000 |
| H  | 0.91045700  | -4.46560200 | -4.07191500 |
| C  | -0.06762000 | -7.61664300 | -3.22835900 |
| H  | -0.32616400 | -8.33856500 | -1.21203000 |
| H  | 0.27641100  | -6.62828200 | -5.11444300 |
| H  | -0.34125600 | -8.56281600 | -3.68530000 |
| H  | -1.97299900 | -2.26828000 | -6.23046400 |
| H  | -1.40452300 | -1.98375700 | -1.98788700 |
| H  | 0.30691000  | -6.17681200 | -0.16508300 |
| Au | -1.01701000 | -0.65203100 | 0.46312000  |
| C  | -2.62544400 | -0.66332300 | 1.74186100  |
| C  | -4.68543300 | -0.86299300 | 2.64901100  |
| C  | -3.82891900 | -0.53908400 | 3.65209500  |
| H  | -3.99525700 | -0.37703500 | 4.70456600  |
| H  | -5.74789800 | -1.04523300 | 2.65083900  |
| N  | -3.93150300 | -0.93571200 | 1.48563000  |
| N  | -2.56989200 | -0.42088200 | 3.08068200  |
| C  | -4.47566400 | -1.27858000 | 0.18724400  |
| C  | -4.96629100 | -0.24160300 | -0.63037000 |
| C  | -4.51497300 | -2.63793900 | -0.18388800 |
| C  | -5.48590100 | -0.60724100 | -1.87885800 |

|   |             |             |             |
|---|-------------|-------------|-------------|
| C | -5.04851700 | -2.94149300 | -1.44272400 |
| C | -5.52408300 | -1.93833100 | -2.28378600 |
| H | -5.87169800 | 0.16329800  | -2.53865300 |
| H | -5.10262400 | -3.97801400 | -1.76149700 |
| H | -5.93846900 | -2.19647200 | -3.25402800 |
| C | -1.36400200 | -0.08209300 | 3.81102000  |
| C | -0.52806400 | -1.13265100 | 4.24811200  |
| C | -1.09381800 | 1.27744500  | 4.06576800  |
| C | 0.63862500  | -0.77441200 | 4.93447200  |
| C | 0.08625900  | 1.57221600  | 4.76278500  |
| C | 0.94602700  | 0.56203900  | 5.18574600  |
| H | 1.30644500  | -1.55115100 | 5.29099900  |
| H | 0.32425000  | 2.60674600  | 4.98810600  |
| H | 1.84857300  | 0.81424000  | 5.73595600  |
| C | -0.89617200 | -2.60369200 | 4.06683600  |
| C | -1.60058500 | -3.13339200 | 5.33501200  |
| C | 0.30313700  | -3.49438300 | 3.69882900  |
| H | -1.60840900 | -2.67325700 | 3.23907000  |
| H | -2.49815500 | -2.55476000 | 5.57523800  |
| H | -1.89939900 | -4.17790000 | 5.19842500  |
| H | -0.93215200 | -3.08492600 | 6.20116500  |
| H | 0.82653600  | -3.12197200 | 2.81438800  |
| H | 1.02282400  | -3.57210500 | 4.52050400  |
| H | -0.04756500 | -4.51002200 | 3.48812400  |
| C | -2.05400500 | 2.40275800  | 3.68714100  |
| C | -1.36980700 | 3.55203100  | 2.92455700  |
| C | -2.77300400 | 2.92936100  | 4.94799900  |
| H | -2.81773300 | 1.99125800  | 3.02040700  |
| H | -0.96399400 | 3.21470600  | 1.96696600  |
| H | -2.10455800 | 4.33557400  | 2.71206400  |
| H | -0.56896900 | 4.01220300  | 3.51328000  |
| H | -3.29427600 | 2.13016200  | 5.48525400  |
| H | -2.06276400 | 3.38576600  | 5.64561000  |
| H | -3.50996100 | 3.69106700  | 4.67439900  |
| C | -4.04312100 | -3.76488200 | 0.73107000  |
| C | -2.91467500 | -4.59365600 | 0.08957000  |
| C | -5.22154600 | -4.66629900 | 1.15173500  |
| H | -3.63539600 | -3.31835100 | 1.64271300  |
| H | -2.05189900 | -3.96851400 | -0.16017800 |
| H | -2.57871700 | -5.37309300 | 0.78169000  |
| H | -3.24868700 | -5.09089000 | -0.82679700 |
| H | -6.01347000 | -4.08996700 | 1.64035200  |
| H | -5.66515500 | -5.17315000 | 0.28867500  |
| H | -4.88169800 | -5.43635500 | 1.85184700  |

|    |             |             |             |
|----|-------------|-------------|-------------|
| C  | -4.98589300 | 1.22234500  | -0.20047600 |
| C  | -6.43513500 | 1.72897400  | -0.04995800 |
| C  | -4.18011300 | 2.11764700  | -1.15974500 |
| H  | -4.51137300 | 1.29757200  | 0.78247600  |
| H  | -7.00720100 | 1.11703800  | 0.65528500  |
| H  | -6.43851400 | 2.76105100  | 0.31443000  |
| H  | -6.96532400 | 1.71372900  | -1.00773400 |
| H  | -3.12618800 | 1.82947100  | -1.18806400 |
| H  | -4.58179200 | 2.07687200  | -2.17801800 |
| H  | -4.22533900 | 3.15952600  | -0.82834800 |
| O  | 1.95295600  | -1.76495400 | 1.02082400  |
| C  | 3.34545800  | 1.49253200  | 1.87219600  |
| C  | 4.61625800  | 2.03621700  | 1.98973300  |
| C  | 5.29069800  | 2.53011400  | 0.87247300  |
| C  | 4.63472000  | 2.45435900  | -0.35478100 |
| C  | 3.36542300  | 1.89826100  | -0.46238400 |
| H  | 6.28558100  | 2.94943300  | 0.95465000  |
| H  | 2.75879200  | 1.12082800  | 2.70157500  |
| H  | 2.80114600  | 1.77770100  | -1.37813200 |
| Cl | 5.39299200  | 3.05760200  | -1.79218500 |
| Cl | 5.35327500  | 2.09571700  | 3.56156100  |
| N  | 2.75297200  | 1.43607100  | 0.65186300  |
| O  | 1.51758200  | 0.93211800  | 0.59374900  |
| C  | 6.37273800  | -0.99133000 | -0.36267000 |
| C  | 5.35288100  | -1.20884100 | -1.20839000 |
| H  | 6.28209100  | -1.38554100 | 0.65049400  |
| H  | 5.37369200  | -0.82409700 | -2.22610700 |
| C  | 7.62069700  | -0.26147100 | -0.62694400 |
| C  | 8.02157800  | 0.13618100  | -1.91675900 |
| C  | 8.45726000  | 0.06171600  | 0.45713300  |
| C  | 9.20467500  | 0.84389900  | -2.10738900 |
| H  | 7.41283900  | -0.12445200 | -2.77704500 |
| C  | 9.64172700  | 0.77247600  | 0.26667300  |
| H  | 8.17323200  | -0.25339000 | 1.45847200  |
| C  | 10.01857000 | 1.16855300  | -1.01730900 |
| H  | 9.50009800  | 1.13667400  | -3.11065000 |
| H  | 10.27307600 | 1.00889100  | 1.11815400  |
| H  | 10.94352300 | 1.71596900  | -1.17131000 |
| C  | 4.13916100  | -1.99233100 | -0.82631700 |
| H  | 4.20453500  | -2.33883400 | 0.20962000  |
| H  | 4.00410400  | -2.86602200 | -1.47842300 |
| O  | 2.98074700  | -1.13005400 | -0.97573800 |
| H  | 1.77269800  | -0.87938600 | 1.38433900  |
| C  | -1.72653700 | 5.77310600  | -1.49582700 |



|   |             |            |             |
|---|-------------|------------|-------------|
| C | -1.35415700 | 4.50651400 | -1.73237700 |
| H | -1.16472500 | 6.33580100 | -0.74901100 |
| H | -1.89400600 | 3.88802900 | -2.44665300 |
| C | -2.82990600 | 6.51692200 | -2.12230400 |
| C | -3.56804400 | 6.02486700 | -3.21545100 |
| C | -3.17136400 | 7.78140600 | -1.61121300 |
| C | -4.61282300 | 6.76440400 | -3.76193900 |
| H | -3.31396400 | 5.06246600 | -3.64932900 |
| C | -4.21747700 | 8.52336200 | -2.15797600 |
| H | -2.60825900 | 8.18230500 | -0.77188400 |
| C | -4.94468400 | 8.01670600 | -3.23547100 |
| H | -5.16719300 | 6.36778400 | -4.60788000 |
| H | -4.46231900 | 9.49734600 | -1.74425900 |
| H | -5.75764900 | 8.59297400 | -3.66699900 |
| C | -0.18968200 | 3.84354600 | -1.06545500 |
| H | 0.30375500  | 4.55723200 | -0.38663100 |
| H | 0.54421000  | 3.54329400 | -1.82969100 |
| O | -0.63963400 | 2.68476800 | -0.35420800 |
| H | 0.13941800  | 2.16002700 | -0.10408300 |

|                                              |                             |
|----------------------------------------------|-----------------------------|
| Zero-point correction=                       | 1.202852 (Hartree/Particle) |
| Thermal correction to Energy=                | 1.282034                    |
| Thermal correction to Enthalpy=              | 1.282978                    |
| Thermal correction to Gibbs Free Energy=     | 1.067953                    |
| Sum of electronic and zero-point Energies=   | -4189.395977                |
| Sum of electronic and thermal Energies=      | -4189.316795                |
| Sum of electronic and thermal Enthalpies=    | -4189.315851                |
| Sum of electronic and thermal Free Energies= | -4189.530876                |

#### 1-INT5

|   |             |            |             |
|---|-------------|------------|-------------|
| C | 1.19334600  | 1.20111600 | -2.81279800 |
| O | 1.28953800  | 0.38827400 | -3.82841700 |
| C | 2.33612700  | 2.10868600 | -2.64236700 |
| C | 3.15635300  | 2.34337900 | -3.76587700 |
| C | 2.65024700  | 2.73507400 | -1.41990700 |
| C | 4.24600400  | 3.20210700 | -3.67286400 |
| H | 2.92064500  | 1.85980300 | -4.70627500 |
| C | 3.75354900  | 3.57763000 | -1.33230500 |
| C | 4.54731000  | 3.82084500 | -2.45686900 |
| H | 4.86070500  | 3.38808900 | -4.54766900 |
| H | 3.99655600  | 4.04180200 | -0.38206100 |
| C | -0.00119900 | 1.16818600 | -1.98211100 |
| C | -1.13978500 | 0.36058700 | -2.54627500 |
| C | -0.36757300 | 2.29949800 | -1.17303100 |

|    |             |             |             |
|----|-------------|-------------|-------------|
| C  | -0.72529300 | 3.24259200  | -0.49474500 |
| C  | -1.12283000 | 4.36137900  | 0.29576300  |
| C  | -2.22325700 | 4.26229000  | 1.17062200  |
| C  | -0.42073600 | 5.58029800  | 0.20842900  |
| C  | -2.60703800 | 5.35898300  | 1.93761700  |
| C  | -0.81124300 | 6.66925100  | 0.98285300  |
| H  | 0.42185300  | 5.66095200  | -0.47099500 |
| C  | -1.90367300 | 6.56307000  | 1.84765700  |
| H  | -3.45833800 | 5.27526900  | 2.60645400  |
| H  | -0.26603500 | 7.60524300  | 0.90768900  |
| H  | -2.20752800 | 7.41610800  | 2.44662700  |
| H  | 5.40072900  | 4.48844000  | -2.38470200 |
| H  | 2.05028700  | 2.54979100  | -0.53865100 |
| H  | -2.76833400 | 3.32602200  | 1.23494800  |
| Au | 0.79424100  | -0.27981600 | -0.45842400 |
| C  | 1.36347200  | -1.60055400 | 0.95609700  |
| C  | 1.44928700  | -3.44820200 | 2.24426900  |
| C  | 2.45133500  | -2.62281400 | 2.64425000  |
| H  | 3.19766200  | -2.72976400 | 3.41475700  |
| H  | 1.14453700  | -4.42097600 | 2.59504500  |
| N  | 0.78895200  | -2.80534300 | 1.20589800  |
| N  | 2.38516200  | -1.49052200 | 1.84300200  |
| C  | -0.36161800 | -3.34712800 | 0.50905800  |
| C  | -1.64405200 | -3.08490100 | 1.03162500  |
| C  | -0.14365000 | -4.12817000 | -0.64360300 |
| C  | -2.73537000 | -3.64021700 | 0.35125800  |
| C  | -1.27396300 | -4.65368400 | -1.28187500 |
| C  | -2.55513500 | -4.41598200 | -0.79133100 |
| H  | -3.73833100 | -3.46859800 | 0.72951200  |
| H  | -1.14667400 | -5.26145000 | -2.17210900 |
| H  | -3.41547200 | -4.84375000 | -1.29775300 |
| C  | 3.27867100  | -0.35476500 | 1.96239000  |
| C  | 4.48172800  | -0.36792900 | 1.22884800  |
| C  | 2.91232900  | 0.69646800  | 2.82700900  |
| C  | 5.33362700  | 0.73285100  | 1.38217300  |
| C  | 3.80457200  | 1.77068300  | 2.93689800  |
| C  | 5.00099200  | 1.78997900  | 2.22494900  |
| H  | 6.27149000  | 0.75891400  | 0.83652200  |
| H  | 3.56134400  | 2.59790300  | 3.59632600  |
| H  | 5.68199100  | 2.62894600  | 2.33488000  |
| C  | 4.88399300  | -1.51527600 | 0.30691800  |
| C  | 6.14643300  | -2.23316800 | 0.82500100  |
| C  | 5.07462000  | -1.03639100 | -1.14535300 |
| H  | 4.07326100  | -2.25005900 | 0.30007200  |

|   |             |             |             |
|---|-------------|-------------|-------------|
| H | 6.00564600  | -2.61087900 | 1.84271100  |
| H | 6.39327100  | -3.08215400 | 0.17955200  |
| H | 7.01172500  | -1.56271600 | 0.83693200  |
| H | 4.17107800  | -0.55141300 | -1.52778300 |
| H | 5.89877000  | -0.32057200 | -1.22833300 |
| H | 5.30826900  | -1.88540400 | -1.79583600 |
| C | 1.62139700  | 0.69666800  | 3.64039600  |
| C | 0.71935600  | 1.89276500  | 3.27942100  |
| C | 1.91417700  | 0.65898500  | 5.15381800  |
| H | 1.06281200  | -0.21230000 | 3.39701000  |
| H | 0.47199200  | 1.90320700  | 2.21336200  |
| H | -0.21727700 | 1.84253000  | 3.84408600  |
| H | 1.19772100  | 2.84690500  | 3.52303900  |
| H | 2.52438400  | -0.20850900 | 5.42442600  |
| H | 2.44890700  | 1.55632600  | 5.48118400  |
| H | 0.97860100  | 0.60575600  | 5.71962100  |
| C | 1.24480200  | -4.41515100 | -1.20706100 |
| C | 1.40351400  | -3.84197000 | -2.62923000 |
| C | 1.56544900  | -5.92252400 | -1.17600200 |
| H | 1.98253300  | -3.91385600 | -0.57333900 |
| H | 1.19932600  | -2.76654800 | -2.65065300 |
| H | 2.42403100  | -4.00394800 | -2.99086900 |
| H | 0.72124600  | -4.32538600 | -3.33581100 |
| H | 1.49040100  | -6.32838600 | -0.16225100 |
| H | 0.88154800  | -6.49180200 | -1.81354800 |
| H | 2.58258600  | -6.10150800 | -1.53889700 |
| C | -1.88090100 | -2.23586100 | 2.27759400  |
| C | -2.58266400 | -3.04192100 | 3.38835100  |
| C | -2.66499400 | -0.95194700 | 1.94116500  |
| H | -0.90816800 | -1.92580500 | 2.67097200  |
| H | -2.01565200 | -3.93973100 | 3.65385600  |
| H | -2.69067900 | -2.43024300 | 4.28966200  |
| H | -3.58484500 | -3.35985000 | 3.08365300  |
| H | -2.15452700 | -0.35759800 | 1.17664700  |
| H | -3.66920600 | -1.17881500 | 1.56922300  |
| H | -2.77729500 | -0.33289900 | 2.83735500  |
| O | -1.00223300 | -0.41049900 | -3.50988600 |
| C | -5.50532800 | -0.45235100 | -1.07597800 |
| C | -4.67340800 | 0.31731600  | -1.79588700 |
| H | -5.23022600 | -1.49907300 | -0.93870800 |
| H | -4.88568200 | 1.36830400  | -1.97652200 |
| C | -6.77435600 | -0.06595500 | -0.44648400 |
| C | -7.48863900 | -1.03562300 | 0.27894900  |
| C | -7.31423600 | 1.23137600  | -0.53344500 |

|                                              |              |             |                             |
|----------------------------------------------|--------------|-------------|-----------------------------|
| C                                            | -8.69723300  | -0.72577300 | 0.90042000                  |
| H                                            | -7.09041600  | -2.04501900 | 0.35027500                  |
| C                                            | -8.52000300  | 1.54163700  | 0.08713300                  |
| H                                            | -6.79256100  | 2.00186600  | -1.09280600                 |
| C                                            | -9.21696800  | 0.56550100  | 0.80687500                  |
| H                                            | -9.23308000  | -1.49143200 | 1.45336500                  |
| H                                            | -8.92244700  | 2.54713500  | 0.00727900                  |
| H                                            | -10.15944400 | 0.81145000  | 1.28656600                  |
| C                                            | -3.44591300  | -0.21993000 | -2.44428300                 |
| H                                            | -3.45173000  | -0.09098300 | -3.53078200                 |
| H                                            | -3.28177200  | -1.27700000 | -2.21857400                 |
| O                                            | -2.28928500  | 0.53804900  | -1.92803200                 |
| H                                            | 0.39200300   | -0.10851000 | -3.91353900                 |
| Zero-point correction=                       |              |             | 0.961282 (Hartree/Particle) |
| Thermal correction to Energy=                |              |             | 1.020737                    |
| Thermal correction to Enthalpy=              |              |             | 1.021681                    |
| Thermal correction to Gibbs Free Energy=     |              |             | 0.854475                    |
| Sum of electronic and zero-point Energies=   |              |             | -2522.910313                |
| Sum of electronic and thermal Energies=      |              |             | -2522.850858                |
| Sum of electronic and thermal Enthalpies=    |              |             | -2522.849914                |
| Sum of electronic and thermal Free Energies= |              |             | -2523.017120                |

#### 6-TS1

|   |             |            |             |
|---|-------------|------------|-------------|
| C | -0.04642000 | 1.62483100 | -0.96959200 |
| O | 0.57962300  | 1.34065000 | -1.99450900 |
| C | 0.49426800  | 2.66283800 | -0.04052200 |
| C | -0.28908500 | 3.71819700 | 0.44840000  |
| C | 1.87150700  | 2.62853600 | 0.24116100  |
| C | 0.29974400  | 4.72572300 | 1.21311600  |
| H | -1.34231400 | 3.76119000 | 0.20219800  |
| C | 2.44357400  | 3.61913500 | 1.03627500  |
| C | 1.66131000  | 4.67222900 | 1.51923000  |
| H | -0.30594200 | 5.55440000 | 1.56740500  |
| H | 3.50366200  | 3.57432300 | 1.26564800  |
| C | -1.33094300 | 0.83487600 | -0.70213700 |
| C | -2.47412500 | 1.18701200 | 0.32448600  |
| C | -2.05147300 | 1.34712100 | 1.72343000  |
| C | -1.88045200 | 1.65122200 | 2.88684300  |
| C | -1.68425100 | 2.02641300 | 4.25153200  |
| C | -2.56150800 | 1.55853900 | 5.24991000  |
| C | -0.63452900 | 2.89537100 | 4.60917300  |
| C | -2.38107200 | 1.94186500 | 6.57634200  |
| C | -0.46415400 | 3.27309100 | 5.93890300  |

|    |             |             |             |
|----|-------------|-------------|-------------|
| H  | 0.03079000  | 3.27044100  | 3.83872200  |
| C  | -1.33226400 | 2.79673900  | 6.92470500  |
| H  | -3.06290600 | 1.57789200  | 7.33890900  |
| H  | 0.34579400  | 3.94481200  | 6.20700600  |
| H  | -1.19600800 | 3.09571500  | 7.95957900  |
| H  | 2.11412000  | 5.45517200  | 2.12083500  |
| H  | 2.48823100  | 1.83861200  | -0.17398700 |
| H  | -3.38308500 | 0.90683200  | 4.97209500  |
| Au | -0.26115500 | -0.89993000 | 0.29291100  |
| C  | 0.70377900  | -2.46942400 | 1.15505400  |
| C  | 2.28300000  | -3.71697400 | 2.17879000  |
| C  | 1.13984400  | -4.44644200 | 2.15803700  |
| H  | 0.92011300  | -5.43797200 | 2.51903900  |
| H  | 3.26414200  | -3.94063300 | 2.56442500  |
| N  | 2.00173200  | -2.50586000 | 1.56173400  |
| N  | 0.17940100  | -3.67203400 | 1.51993700  |
| C  | 3.00382700  | -1.47830000 | 1.34927300  |
| C  | 3.62997200  | -1.40342900 | 0.08781000  |
| C  | 3.35211400  | -0.64839800 | 2.43370600  |
| C  | 4.60469000  | -0.41221700 | -0.08212500 |
| C  | 4.35429200  | 0.30373100  | 2.21046600  |
| C  | 4.96495900  | 0.43033800  | 0.96546100  |
| H  | 5.08228400  | -0.29222200 | -1.04730200 |
| H  | 4.65810500  | 0.95464000  | 3.02417400  |
| H  | 5.73044900  | 1.18395300  | 0.80604400  |
| C  | -1.14172700 | -4.16656000 | 1.18793900  |
| C  | -2.23202100 | -3.81875900 | 2.01076500  |
| C  | -1.26030700 | -5.02019600 | 0.07195400  |
| C  | -3.48629300 | -4.32983000 | 1.65456700  |
| C  | -2.54031900 | -5.49971400 | -0.23408700 |
| C  | -3.64221200 | -5.15416400 | 0.54299300  |
| H  | -4.35138100 | -4.08704000 | 2.26154100  |
| H  | -2.67219100 | -6.16002800 | -1.08555100 |
| H  | -4.62515900 | -5.54138300 | 0.29119900  |
| C  | -2.06466900 | -2.99029800 | 3.28075600  |
| C  | -1.87586000 | -3.91834300 | 4.50040600  |
| C  | -3.22228300 | -2.00702200 | 3.51908400  |
| H  | -1.15490500 | -2.39110500 | 3.17657200  |
| H  | -1.01361700 | -4.58165800 | 4.37833100  |
| H  | -1.71979200 | -3.32730500 | 5.40868600  |
| H  | -2.76024300 | -4.54585400 | 4.65379100  |
| H  | -3.38659900 | -1.36079300 | 2.65272800  |
| H  | -4.15938100 | -2.52385700 | 3.75127600  |
| H  | -2.98471400 | -1.37315700 | 4.37845800  |

|    |             |             |             |
|----|-------------|-------------|-------------|
| C  | -0.06838900 | -5.45497600 | -0.77892300 |
| C  | -0.18511400 | -4.95097500 | -2.22857700 |
| C  | 0.12211300  | -6.98430700 | -0.73863300 |
| H  | 0.83773900  | -5.00771700 | -0.36186200 |
| H  | -0.24360100 | -3.85855000 | -2.25823800 |
| H  | 0.68995900  | -5.25904700 | -2.81010700 |
| H  | -1.07326700 | -5.35818000 | -2.72331700 |
| H  | 0.23436100  | -7.34771700 | 0.28759400  |
| H  | -0.72932300 | -7.50930100 | -1.18333400 |
| H  | 1.01786600  | -7.27040300 | -1.29906500 |
| C  | 2.71864700  | -0.77654500 | 3.81638400  |
| C  | 2.17659000  | 0.56722000  | 4.33454500  |
| C  | 3.71420500  | -1.38865200 | 4.82345400  |
| H  | 1.86502700  | -1.45736000 | 3.74028500  |
| H  | 1.47530100  | 1.01349800  | 3.62533300  |
| H  | 1.65222300  | 0.42269600  | 5.28416000  |
| H  | 2.98157400  | 1.28795100  | 4.51169700  |
| H  | 4.07122200  | -2.37141300 | 4.49852700  |
| H  | 4.59138700  | -0.74537200 | 4.94852600  |
| H  | 3.24266600  | -1.50764100 | 5.80434700  |
| C  | 3.33478300  | -2.37215100 | -1.05464100 |
| C  | 4.59174500  | -3.18843700 | -1.41961700 |
| C  | 2.76446400  | -1.65545300 | -2.29271600 |
| H  | 2.57847600  | -3.08612300 | -0.71332500 |
| H  | 4.98989600  | -3.72367200 | -0.55165000 |
| H  | 4.35331200  | -3.92549000 | -2.19362000 |
| H  | 5.38743800  | -2.54554000 | -1.80867300 |
| H  | 1.82761900  | -1.14260100 | -2.05339500 |
| H  | 3.44870700  | -0.89611200 | -2.67974900 |
| H  | 2.56936200  | -2.38371400 | -3.08838000 |
| O  | -3.43976900 | 0.14315000  | 0.29004900  |
| C  | -0.92235700 | -0.83817000 | -3.68707000 |
| C  | -0.98994400 | -1.80592400 | -4.69232600 |
| C  | -2.00180300 | -2.76895200 | -4.65737300 |
| C  | -2.90467800 | -2.76433700 | -3.59032000 |
| C  | -2.79043900 | -1.79612500 | -2.59145100 |
| H  | -2.08664500 | -3.50741000 | -5.44622500 |
| H  | -0.20287300 | -0.02375600 | -3.62815300 |
| H  | -3.43848100 | -1.73517600 | -1.72484300 |
| Cl | -4.17667100 | -3.93975500 | -3.50647800 |
| Cl | 0.16122800  | -1.78166100 | -5.98531900 |
| N  | -1.81052000 | -0.90420100 | -2.70300000 |
| O  | -1.93687100 | 0.60904500  | -1.87811600 |
| C  | -6.20142700 | 3.79217700  | -0.55442000 |

|   |              |            |             |
|---|--------------|------------|-------------|
| C | -4.88521900  | 3.89672500 | -0.31518700 |
| H | -6.73669800  | 2.96559200 | -0.08479900 |
| H | -4.29522400  | 4.69719000 | -0.75644400 |
| C | -7.04179400  | 4.67092900 | -1.37959500 |
| C | -6.54548200  | 5.80036500 | -2.05778300 |
| C | -8.40969800  | 4.37115800 | -1.50454500 |
| C | -7.38768600  | 6.59246900 | -2.83174700 |
| H | -5.49510500  | 6.06373900 | -1.97919700 |
| C | -9.25457300  | 5.16476400 | -2.27891700 |
| H | -8.81165100  | 3.50467300 | -0.98496100 |
| C | -8.74594400  | 6.27909700 | -2.94654800 |
| H | -6.98595400  | 7.46010600 | -3.34702900 |
| H | -10.30812800 | 4.91384800 | -2.35930500 |
| H | -9.40004700  | 6.90113000 | -3.55010500 |
| C | -4.14254900  | 2.95647800 | 0.57750300  |
| H | -4.79727700  | 2.16424500 | 0.95417800  |
| H | -3.70168500  | 3.47673500 | 1.43821600  |
| O | -3.06121200  | 2.36993000 | -0.19992000 |
| H | -3.88047500  | 0.26478700 | -0.56569100 |
| C | 6.32706300   | 3.44500500 | -1.94036100 |
| C | 5.52815700   | 2.70046100 | -2.71948900 |
| H | 5.85416400   | 4.18104400 | -1.28839300 |
| H | 5.93980000   | 1.93860300 | -3.37959100 |
| C | 7.79436400   | 3.39663800 | -1.84625300 |
| C | 8.43641800   | 4.17734600 | -0.86891700 |
| C | 8.59552000   | 2.60100700 | -2.68712300 |
| C | 9.82315500   | 4.15961000 | -0.72538900 |
| H | 7.83569100   | 4.80581600 | -0.21561600 |
| C | 9.97969400   | 2.58170800 | -2.54444700 |
| H | 8.13355000   | 2.00062000 | -3.46494600 |
| C | 10.60129800  | 3.35926400 | -1.56222500 |
| H | 10.29517300  | 4.77279300 | 0.03686500  |
| H | 10.57931400  | 1.96288700 | -3.20594000 |
| H | 11.68195000  | 3.34464300 | -1.45668500 |
| C | 4.03718100   | 2.84351000 | -2.76390300 |
| H | 3.73029100   | 3.20363800 | -3.76102100 |
| H | 3.71111200   | 3.59742700 | -2.03141200 |
| O | 3.44993500   | 1.57008100 | -2.49785700 |
| H | 2.48240300   | 1.66205200 | -2.48675500 |

|                                          |                             |
|------------------------------------------|-----------------------------|
| Zero-point correction=                   | 1.202805 (Hartree/Particle) |
| Thermal correction to Energy=            | 1.280932                    |
| Thermal correction to Enthalpy=          | 1.281876                    |
| Thermal correction to Gibbs Free Energy= | 1.075094                    |

|                                              |              |
|----------------------------------------------|--------------|
| Sum of electronic and zero-point Energies=   | -4189.389062 |
| Sum of electronic and thermal Energies=      | -4189.310935 |
| Sum of electronic and thermal Enthalpies=    | -4189.309991 |
| Sum of electronic and thermal Free Energies= | -4189.516773 |

6-INT1

|    |             |             |             |
|----|-------------|-------------|-------------|
| C  | 1.49494900  | -2.28468800 | 0.81484900  |
| O  | 0.32451700  | -2.06021700 | 1.19624000  |
| C  | 2.17703500  | -3.51367800 | 1.19157000  |
| C  | 1.57820200  | -4.36841600 | 2.14223900  |
| C  | 3.39915500  | -3.87798500 | 0.59322400  |
| C  | 2.20292200  | -5.55557200 | 2.49491000  |
| H  | 0.63590500  | -4.07803600 | 2.59311200  |
| C  | 4.01173400  | -5.07689600 | 0.94408800  |
| C  | 3.41861600  | -5.91084900 | 1.89529000  |
| H  | 1.74978800  | -6.20916000 | 3.23323500  |
| H  | 4.94980700  | -5.36028600 | 0.47849000  |
| C  | 2.13475600  | -1.23570200 | -0.11971800 |
| C  | 3.14251100  | -0.25580600 | 0.57473400  |
| C  | 4.50756200  | -0.68321700 | 0.24880600  |
| C  | 5.61875500  | -1.04653700 | -0.07937600 |
| C  | 6.93007100  | -1.47692900 | -0.44231600 |
| C  | 7.84247400  | -1.88311800 | 0.55169300  |
| C  | 7.32177100  | -1.49984400 | -1.79547100 |
| C  | 9.11983400  | -2.30377200 | 0.19275800  |
| C  | 8.60195300  | -1.92242200 | -2.14214300 |
| H  | 6.61869200  | -1.18449400 | -2.55963100 |
| C  | 9.50178300  | -2.32465700 | -1.15146000 |
| H  | 9.82018000  | -2.61342800 | 0.96230900  |
| H  | 8.89933700  | -1.93692400 | -3.18610300 |
| H  | 10.49981200 | -2.65210700 | -1.42627200 |
| H  | 3.90246300  | -6.84304000 | 2.17125400  |
| H  | 3.86339400  | -3.23331800 | -0.14418900 |
| H  | 7.54015000  | -1.86058000 | 1.59362300  |
| Au | -1.27736900 | -0.88506200 | 0.42630700  |
| C  | -2.90792300 | 0.01068700  | -0.25203100 |
| C  | -4.90911700 | 0.32118500  | -1.23716500 |
| C  | -4.52120100 | 1.51141400  | -0.71018500 |
| H  | -4.99685500 | 2.47869200  | -0.70667100 |
| H  | -5.79323200 | 0.03843700  | -1.78528000 |
| N  | -3.90649800 | -0.59345700 | -0.94708900 |
| N  | -3.28726300 | 1.30493900  | -0.10810300 |
| C  | -3.93044100 | -1.99033700 | -1.33740700 |



|   |             |             |             |
|---|-------------|-------------|-------------|
| C | -3.35557500 | -2.35016100 | -2.57300800 |
| C | -4.53861500 | -2.91838500 | -0.46866300 |
| C | -3.39575900 | -3.70573700 | -2.92232100 |
| C | -4.54698900 | -4.25891800 | -0.87318800 |
| C | -3.98141200 | -4.64998200 | -2.08374800 |
| H | -2.96399900 | -4.02375600 | -3.86599100 |
| H | -5.00531800 | -5.00506800 | -0.23171800 |
| H | -4.00156800 | -5.69532100 | -2.37727600 |
| C | -2.51885600 | 2.34695300  | 0.54480500  |
| C | -2.68360300 | 2.53789100  | 1.93094700  |
| C | -1.66645300 | 3.13944000  | -0.24958900 |
| C | -1.94313100 | 3.56875900  | 2.52287800  |
| C | -0.95409800 | 4.15601700  | 0.39817800  |
| C | -1.08923100 | 4.36793000  | 1.76742500  |
| H | -2.04301800 | 3.74990900  | 3.58860000  |
| H | -0.28383300 | 4.78950700  | -0.17338500 |
| H | -0.52699700 | 5.16557300  | 2.24370800  |
| C | -3.62410900 | 1.69243400  | 2.78483400  |
| C | -4.75993200 | 2.54636500  | 3.38254800  |
| C | -2.85998100 | 0.93484700  | 3.88789600  |
| H | -4.08878600 | 0.93879900  | 2.14168200  |
| H | -5.33037100 | 3.05874800  | 2.60142400  |
| H | -5.45218200 | 1.91611200  | 3.95010900  |
| H | -4.37108500 | 3.30976000  | 4.06409600  |
| H | -2.07942400 | 0.29602000  | 3.46143700  |
| H | -2.38292400 | 1.62327200  | 4.59305800  |
| H | -3.54625500 | 0.30038900  | 4.45816400  |
| C | -1.50803200 | 2.94021000  | -1.75406300 |
| C | -0.05465300 | 2.59819000  | -2.13284900 |
| C | -2.00842100 | 4.17180000  | -2.53537300 |
| H | -2.12852900 | 2.09114100  | -2.05655200 |
| H | 0.31099500  | 1.71762200  | -1.59674900 |
| H | 0.01625700  | 2.39869800  | -3.20733600 |
| H | 0.61851800  | 3.42999600  | -1.90418300 |
| H | -3.05143100 | 4.40446000  | -2.29744000 |
| H | -1.40937500 | 5.05905300  | -2.30660000 |
| H | -1.93870200 | 3.99193400  | -3.61310100 |
| C | -5.17260600 | -2.52412200 | 0.86233000  |
| C | -4.43568000 | -3.17250700 | 2.05065800  |
| C | -6.67686800 | -2.85915300 | 0.89200900  |
| H | -5.08083700 | -1.43988400 | 0.97873000  |
| H | -3.37505700 | -2.90030500 | 2.05608200  |
| H | -4.87760700 | -2.84370900 | 2.99692900  |
| H | -4.50200100 | -4.26477600 | 2.01529400  |

|                                              |             |             |                             |
|----------------------------------------------|-------------|-------------|-----------------------------|
| H                                            | -7.21167000 | -2.37833300 | 0.06693500                  |
| H                                            | -6.84956600 | -3.93730000 | 0.81596600                  |
| H                                            | -7.12353300 | -2.51756500 | 1.83121800                  |
| C                                            | -2.72152600 | -1.34053700 | -3.52531600                 |
| C                                            | -3.50697200 | -1.25794400 | -4.84990000                 |
| C                                            | -1.23348200 | -1.65015300 | -3.78009400                 |
| H                                            | -2.76896900 | -0.35177400 | -3.05896100                 |
| H                                            | -4.55757200 | -1.00161700 | -4.67970100                 |
| H                                            | -3.07220700 | -0.49376600 | -5.50207300                 |
| H                                            | -3.48094600 | -2.20950200 | -5.39048800                 |
| H                                            | -0.65591100 | -1.65789100 | -2.85066300                 |
| H                                            | -1.10332900 | -2.62230300 | -4.26664100                 |
| H                                            | -0.79959700 | -0.89158300 | -4.43963500                 |
| O                                            | 2.96722400  | -0.37550100 | 1.98051300                  |
| O                                            | 1.78496200  | -1.16279400 | -1.27178300                 |
| C                                            | 2.99025600  | 4.44651700  | 0.56123700                  |
| C                                            | 3.24126000  | 3.34371700  | -0.16067200                 |
| H                                            | 3.13000600  | 4.38860100  | 1.64128100                  |
| H                                            | 3.11154700  | 3.33061200  | -1.24012500                 |
| C                                            | 2.53060200  | 5.75418700  | 0.07226400                  |
| C                                            | 2.38109200  | 6.05846000  | -1.29508000                 |
| C                                            | 2.21151800  | 6.75205900  | 1.01111900                  |
| C                                            | 1.91648200  | 7.30687900  | -1.70024300                 |
| H                                            | 2.64421400  | 5.32063700  | -2.04696000                 |
| C                                            | 1.74769500  | 8.00312000  | 0.60542300                  |
| H                                            | 2.33634300  | 6.54129800  | 2.07056500                  |
| C                                            | 1.59550000  | 8.28439200  | -0.75269200                 |
| H                                            | 1.81392600  | 7.52399400  | -2.75950300                 |
| H                                            | 1.51102900  | 8.75848800  | 1.34889100                  |
| H                                            | 1.23889900  | 9.25856000  | -1.07307600                 |
| C                                            | 3.74202700  | 2.07473500  | 0.44176800                  |
| H                                            | 3.83735500  | 2.15677900  | 1.53041000                  |
| H                                            | 4.72149000  | 1.79880800  | 0.03086100                  |
| O                                            | 2.80157700  | 1.01448000  | 0.10931800                  |
| H                                            | 2.18970600  | 0.16075500  | 2.20417800                  |
| Zero-point correction=                       |             |             | 0.964440 (Hartree/Particle) |
| Thermal correction to Energy=                |             |             | 1.025639                    |
| Thermal correction to Enthalpy=              |             |             | 1.026583                    |
| Thermal correction to Gibbs Free Energy=     |             |             | 0.855030                    |
| Sum of electronic and zero-point Energies=   |             |             | -2598.078305                |
| Sum of electronic and thermal Energies=      |             |             | -2598.017105                |
| Sum of electronic and thermal Enthalpies=    |             |             | -2598.016161                |
| Sum of electronic and thermal Free Energies= |             |             | -2598.187715                |

## 7-TS1

|    |             |             |             |
|----|-------------|-------------|-------------|
| C  | 0.12424600  | -2.44393000 | 0.24792000  |
| O  | -1.05383600 | -2.72511800 | 0.46221600  |
| C  | 1.01419300  | -3.40988200 | -0.45326900 |
| C  | 0.60907000  | -4.75727600 | -0.43325300 |
| C  | 2.16998000  | -3.04626700 | -1.16495700 |
| C  | 1.35556700  | -5.72611100 | -1.09595800 |
| H  | -0.29174600 | -5.02337700 | 0.10878800  |
| C  | 2.90657600  | -4.02065300 | -1.83723700 |
| C  | 2.50525200  | -5.35863700 | -1.80131700 |
| H  | 1.04189000  | -6.76492000 | -1.06678600 |
| H  | 3.79183000  | -3.73479100 | -2.39720600 |
| C  | 0.60983700  | -1.07834500 | 0.65716100  |
| C  | 0.53635000  | -0.73548200 | 2.12255000  |
| C  | 1.38557300  | 0.32387600  | 2.65486900  |
| C  | 2.03051500  | 1.18038400  | 3.22231400  |
| C  | 2.81153400  | 2.17713000  | 3.88228500  |
| C  | 4.21692300  | 2.09133700  | 3.87945000  |
| C  | 2.18630500  | 3.24788100  | 4.54989300  |
| C  | 4.97710500  | 3.05948100  | 4.53053100  |
| C  | 2.95529600  | 4.21119900  | 5.19814400  |
| H  | 1.10297400  | 3.31148700  | 4.55539400  |
| C  | 4.34997200  | 4.12014700  | 5.19037600  |
| H  | 6.06042300  | 2.98512400  | 4.52823800  |
| H  | 2.46671400  | 5.03177100  | 5.71473800  |
| H  | 4.94581200  | 4.87022900  | 5.70159700  |
| H  | 3.08537300  | -6.11316300 | -2.32442900 |
| H  | 2.48941100  | -2.01204000 | -1.18772000 |
| H  | 4.69570100  | 1.26479400  | 3.36484500  |
| Au | 0.80502700  | 0.33575400  | -0.78139600 |
| C  | 0.87032700  | 1.77080000  | -2.24604500 |
| C  | 0.46973100  | 2.90550300  | -4.15830500 |
| C  | 1.24554500  | 3.69447400  | -3.36957800 |
| H  | 1.64617700  | 4.68305500  | -3.52558400 |
| H  | 0.05273600  | 3.07071800  | -5.13847700 |
| N  | 0.25095200  | 1.72944300  | -3.45706500 |
| N  | 1.48039100  | 2.98496400  | -2.20090800 |
| C  | -0.54536200 | 0.62101600  | -3.94659200 |
| C  | 0.07619300  | -0.33629600 | -4.77516000 |
| C  | -1.90542800 | 0.56062500  | -3.58511200 |
| C  | -0.71454900 | -1.39918100 | -5.22636100 |
| C  | -2.64076300 | -0.53587800 | -4.05431200 |
| C  | -2.05499500 | -1.50465700 | -4.86284600 |

|   |             |             |             |
|---|-------------|-------------|-------------|
| H | -0.27578700 | -2.15462800 | -5.87009400 |
| H | -3.68777400 | -0.62569400 | -3.78416700 |
| H | -2.64711100 | -2.34227800 | -5.21955600 |
| C | 2.26105700  | 3.49837400  | -1.09322000 |
| C | 1.60599300  | 4.26833200  | -0.11166600 |
| C | 3.64577400  | 3.23932400  | -1.06955800 |
| C | 2.39553800  | 4.79497200  | 0.91779100  |
| C | 4.38215500  | 3.79272000  | -0.01540300 |
| C | 3.76715700  | 4.56434700  | 0.96640800  |
| H | 1.92745900  | 5.39159200  | 1.69409600  |
| H | 5.45241900  | 3.61762300  | 0.03475800  |
| H | 4.35634500  | 4.97997700  | 1.77789100  |
| C | 0.10493900  | 4.54218400  | -0.13017300 |
| C | -0.18998000 | 6.04568000  | -0.29978700 |
| C | -0.58650800 | 3.97682000  | 1.12595700  |
| H | -0.32840500 | 4.02694400  | -0.99244400 |
| H | 0.26522800  | 6.44483800  | -1.21194100 |
| H | -1.26964400 | 6.21749900  | -0.35647000 |
| H | 0.19508800  | 6.62684900  | 0.54448200  |
| H | -0.40864300 | 2.90260700  | 1.23251400  |
| H | -0.22634000 | 4.47077600  | 2.03485300  |
| H | -1.66773800 | 4.13860200  | 1.06728700  |
| C | 4.35299600  | 2.40020200  | -2.12941600 |
| C | 5.03851100  | 1.16805800  | -1.50578200 |
| C | 5.35508500  | 3.24371400  | -2.94149400 |
| H | 3.59994700  | 2.02600600  | -2.82905300 |
| H | 4.32387200  | 0.56276000  | -0.93854700 |
| H | 5.48011500  | 0.54557400  | -2.29177300 |
| H | 5.84533600  | 1.46282900  | -0.82611400 |
| H | 4.86381900  | 4.09477200  | -3.42367800 |
| H | 6.15379100  | 3.63887200  | -2.30533700 |
| H | 5.82220300  | 2.63530200  | -3.72282300 |
| C | -2.59761300 | 1.62747000  | -2.74077700 |
| C | -3.02908200 | 1.07640300  | -1.36827100 |
| C | -3.79307400 | 2.24622000  | -3.49334000 |
| H | -1.88398900 | 2.43765500  | -2.55931500 |
| H | -2.16423600 | 0.76953200  | -0.77221100 |
| H | -3.56722900 | 1.84477200  | -0.80324900 |
| H | -3.68311400 | 0.20444400  | -1.45917000 |
| H | -3.49382300 | 2.64667900  | -4.46731900 |
| H | -4.58763000 | 1.51292100  | -3.66403700 |
| H | -4.22243700 | 3.06411900  | -2.90613200 |
| C | 1.53156500  | -0.22072500 | -5.22094500 |
| C | 1.61707900  | 0.28803800  | -6.67522300 |

|    |             |             |             |
|----|-------------|-------------|-------------|
| C  | 2.30931100  | -1.53955600 | -5.06160200 |
| H  | 2.02452700  | 0.51996800  | -4.58322200 |
| H  | 1.12173700  | 1.25666400  | -6.79536600 |
| H  | 2.66191400  | 0.40232100  | -6.98229100 |
| H  | 1.13843700  | -0.41523200 | -7.36462400 |
| H  | 2.23512400  | -1.92858900 | -4.04212600 |
| H  | 1.94316500  | -2.31453700 | -5.74247900 |
| H  | 3.36743200  | -1.37956800 | -5.29374200 |
| O  | 0.57853100  | -1.87768700 | 2.93215400  |
| C  | 3.45556100  | -3.29093200 | 2.27036200  |
| C  | 4.29476700  | -4.31950500 | 2.67357600  |
| C  | 5.61873400  | -4.39571000 | 2.24343500  |
| C  | 6.05680400  | -3.38700300 | 1.38553000  |
| C  | 5.21260500  | -2.36418300 | 0.98163100  |
| H  | 6.27443100  | -5.19641000 | 2.56000400  |
| H  | 2.42604800  | -3.17700600 | 2.57894600  |
| H  | 5.49753100  | -1.55785600 | 0.32186800  |
| Cl | 7.69164300  | -3.39179100 | 0.79123600  |
| Cl | 3.65523200  | -5.53030100 | 3.74651600  |
| N  | 3.92266100  | -2.32074200 | 1.43051600  |
| O  | 3.15597300  | -1.34985300 | 1.05102200  |
| C  | -4.08448300 | 0.47052500  | 2.36914000  |
| C  | -2.87514100 | 0.35335400  | 2.94879800  |
| H  | -4.35948500 | -0.28681900 | 1.63517800  |
| H  | -2.52154200 | 1.06743400  | 3.68931800  |
| C  | -5.10183000 | 1.49683400  | 2.62139700  |
| C  | -4.87631900 | 2.63213300  | 3.42384100  |
| C  | -6.36925300 | 1.33967900  | 2.03043000  |
| C  | -5.88382000 | 3.56935500  | 3.62833100  |
| H  | -3.90555400 | 2.78547100  | 3.88582500  |
| C  | -7.37947800 | 2.27747100  | 2.23787200  |
| H  | -6.55989300 | 0.46554800  | 1.41333400  |
| C  | -7.14013000 | 3.39592700  | 3.03739700  |
| H  | -5.69269900 | 4.43948300  | 4.24988800  |
| H  | -8.35222500 | 2.13249600  | 1.77742500  |
| H  | -7.92453200 | 4.12893100  | 3.20115600  |
| C  | -1.96699700 | -0.78061800 | 2.62336600  |
| H  | -2.44309100 | -1.50293700 | 1.96435200  |
| H  | -1.59325600 | -1.29273600 | 3.51265300  |
| O  | -0.80499300 | -0.21204300 | 1.90462200  |
| H  | 0.77502200  | -1.59320800 | 3.83684000  |
| C  | -7.17576100 | -2.79542900 | 0.67878400  |
| C  | -6.16977300 | -2.61021200 | -0.18936300 |
| H  | -6.95603700 | -3.33479100 | 1.60104400  |

|                                              |              |             |                             |
|----------------------------------------------|--------------|-------------|-----------------------------|
| H                                            | -6.32282400  | -2.06096600 | -1.11677200                 |
| C                                            | -8.57164700  | -2.35039800 | 0.54667500                  |
| C                                            | -9.44692400  | -2.53889000 | 1.63072300                  |
| C                                            | -9.08021300  | -1.74044100 | -0.61591800                 |
| C                                            | -10.77731900 | -2.12741100 | 1.56479200                  |
| H                                            | -9.07413900  | -3.01277700 | 2.53543400                  |
| C                                            | -10.40784400 | -1.32838300 | -0.68252200                 |
| H                                            | -8.43590100  | -1.59686000 | -1.47806300                 |
| C                                            | -11.26336300 | -1.51866100 | 0.40734100                  |
| H                                            | -11.43355500 | -2.28419900 | 2.41589200                  |
| H                                            | -10.78120600 | -0.86270400 | -1.59019600                 |
| H                                            | -12.29984000 | -1.19981100 | 0.35012900                  |
| C                                            | -4.78068700  | -3.12792900 | 0.02144200                  |
| H                                            | -4.53688300  | -3.86443200 | -0.76232400                 |
| H                                            | -4.71496100  | -3.64692600 | 0.98965400                  |
| O                                            | -3.86908200  | -2.02724300 | -0.04460500                 |
| H                                            | -2.96186400  | -2.36939200 | -0.04070000                 |
| Zero-point correction=                       |              |             | 1.201807 (Hartree/Particle) |
| Thermal correction to Energy=                |              |             | 1.281697                    |
| Thermal correction to Enthalpy=              |              |             | 1.282641                    |
| Thermal correction to Gibbs Free Energy=     |              |             | 1.064396                    |
| Sum of electronic and zero-point Energies=   |              |             | -4189.379375                |
| Sum of electronic and thermal Energies=      |              |             | -4189.299484                |
| Sum of electronic and thermal Enthalpies=    |              |             | -4189.298540                |
| Sum of electronic and thermal Free Energies= |              |             | -4189.516785                |

#### 7-INT1

|   |             |             |             |
|---|-------------|-------------|-------------|
| C | -2.81271200 | 4.04614000  | -0.18947000 |
| O | -3.67697200 | 4.37060100  | -0.99554500 |
| C | -2.05032100 | 5.08578100  | 0.57042300  |
| C | -1.56738200 | 4.86292600  | 1.87358600  |
| C | -1.90964700 | 6.35902000  | -0.00967800 |
| C | -0.93996600 | 5.89432700  | 2.57382800  |
| H | -1.71406800 | 3.89613500  | 2.34677800  |
| C | -1.27095600 | 7.37928400  | 0.68755000  |
| C | -0.78606900 | 7.14857400  | 1.97977800  |
| H | -0.58561700 | 5.72244300  | 3.58544600  |
| H | -1.15740200 | 8.35787500  | 0.23146800  |
| C | -2.53693400 | 2.58614400  | 0.02194700  |
| C | -1.27798200 | 2.05685100  | 0.16929400  |
| C | -1.11953900 | 0.63526500  | 0.12392700  |
| C | -1.46228500 | -0.56209600 | 0.13156000  |
| C | -2.06773700 | -1.85289800 | 0.08071300  |

|    |             |             |             |
|----|-------------|-------------|-------------|
| C  | -1.48827900 | -2.98396900 | 0.68853700  |
| C  | -3.31491100 | -1.96212100 | -0.57347100 |
| C  | -2.15013900 | -4.20655800 | 0.63528100  |
| C  | -3.96997900 | -3.18936900 | -0.60166700 |
| H  | -3.75843100 | -1.08251900 | -1.02627000 |
| C  | -3.38882100 | -4.31175600 | -0.00398100 |
| H  | -1.69919000 | -5.07758900 | 1.09958200  |
| H  | -4.93674700 | -3.26719600 | -1.08820800 |
| H  | -3.90250100 | -5.26776100 | -0.03500800 |
| H  | -0.29738000 | 7.94980500  | 2.52602100  |
| H  | -2.31476600 | 6.52490600  | -1.00235200 |
| H  | -0.53212500 | -2.89786500 | 1.19377300  |
| Au | 0.89364000  | -0.30472500 | -0.02322000 |
| C  | 2.86643800  | -0.74697100 | -0.15222400 |
| C  | 5.07796100  | -0.58923900 | -0.55314500 |
| C  | 4.84793000  | -1.81225300 | -0.00919300 |
| H  | 5.51592500  | -2.62535600 | 0.22493100  |
| H  | 5.98780100  | -0.11841500 | -0.88858900 |
| N  | 3.85030200  | 0.05361700  | -0.63463000 |
| N  | 3.48301100  | -1.89375100 | 0.23309200  |
| C  | 3.67149000  | 1.39565700  | -1.15658500 |
| C  | 3.39864300  | 1.55017900  | -2.53038700 |
| C  | 3.81535000  | 2.48273600  | -0.27112300 |
| C  | 3.26871700  | 2.85915900  | -3.01083100 |
| C  | 3.68109500  | 3.76706500  | -0.81222200 |
| C  | 3.41106100  | 3.95526300  | -2.16488200 |
| H  | 3.05871000  | 3.02026400  | -4.06347000 |
| H  | 3.79312800  | 4.63066200  | -0.16423700 |
| H  | 3.31473600  | 4.96108600  | -2.56292500 |
| C  | 2.82772000  | -3.04986300 | 0.81210100  |
| C  | 2.67160000  | -3.10137200 | 2.21247000  |
| C  | 2.40480000  | -4.08209600 | -0.04951900 |
| C  | 2.05439000  | -4.24089100 | 2.74423500  |
| C  | 1.79921000  | -5.19836000 | 0.54174100  |
| C  | 1.62556700  | -5.27927400 | 1.92104100  |
| H  | 1.91925700  | -4.31943700 | 3.81837000  |
| H  | 1.46503100  | -6.01695800 | -0.08773200 |
| H  | 1.16250400  | -6.15925700 | 2.35799000  |
| C  | 3.15139100  | -1.99537800 | 3.14780800  |
| C  | 4.24536200  | -2.50621000 | 4.10649600  |
| C  | 1.97997200  | -1.36433700 | 3.92530300  |
| H  | 3.59891500  | -1.20258100 | 2.54114300  |
| H  | 5.09559400  | -2.92414400 | 3.55845400  |
| H  | 4.61438200  | -1.68669500 | 4.73122300  |

|   |             |             |             |
|---|-------------|-------------|-------------|
| H | 3.86452400  | -3.28587500 | 4.77387800  |
| H | 1.22083400  | -0.96434700 | 3.24499600  |
| H | 1.49310400  | -2.09244400 | 4.58223000  |
| H | 2.34061100  | -0.54302500 | 4.55298600  |
| C | 2.57911300  | -4.02705700 | -1.56447300 |
| C | 1.21760100  | -4.01794000 | -2.28664900 |
| C | 3.47109400  | -5.17645700 | -2.07370400 |
| H | 3.08476700  | -3.09007200 | -1.81689700 |
| H | 0.59342900  | -3.18294500 | -1.95326800 |
| H | 1.36304700  | -3.92581700 | -3.36777100 |
| H | 0.66125300  | -4.94313900 | -2.10518400 |
| H | 4.45174200  | -5.17053900 | -1.58756800 |
| H | 3.01432000  | -6.15386000 | -1.88827500 |
| H | 3.62715500  | -5.08446200 | -3.15315400 |
| C | 4.12337800  | 2.31307300  | 1.21373300  |
| C | 3.07920300  | 3.01792800  | 2.10112200  |
| C | 5.54951200  | 2.79750300  | 1.54429800  |
| H | 4.07649400  | 1.24626300  | 1.45354800  |
| H | 2.06450300  | 2.68677700  | 1.86181000  |
| H | 3.27676100  | 2.80182000  | 3.15625400  |
| H | 3.11645200  | 4.10551500  | 1.97921800  |
| H | 6.30362900  | 2.26441400  | 0.95653800  |
| H | 5.66298000  | 3.86637200  | 1.33608000  |
| H | 5.77159300  | 2.63825700  | 2.60440200  |
| C | 3.24680400  | 0.37434100  | -3.49070200 |
| C | 4.33452700  | 0.39455900  | -4.58295500 |
| C | 1.83618300  | 0.33369500  | -4.11053800 |
| H | 3.37555400  | -0.55263700 | -2.92363800 |
| H | 5.33959500  | 0.38691500  | -4.14933100 |
| H | 4.23836200  | -0.48207100 | -5.23154700 |
| H | 4.25250300  | 1.28458000  | -5.21495400 |
| H | 1.06313900  | 0.28788700  | -3.33654000 |
| H | 1.64163900  | 1.21825500  | -4.72534900 |
| H | 1.72907900  | -0.54616100 | -4.75317700 |
| O | -0.10192200 | 2.74242000  | 0.25496100  |
| C | -6.71661200 | 0.46478100  | -0.40402100 |
| C | -5.66422700 | 0.77574100  | 0.37018500  |
| H | -6.99286200 | 1.17240100  | -1.18632900 |
| H | -5.32637700 | 0.10571400  | 1.15804900  |
| C | -7.56192200 | -0.73497800 | -0.33519100 |
| C | -8.54532800 | -0.92372200 | -1.32243200 |
| C | -7.43659700 | -1.71054400 | 0.67278900  |
| C | -9.36940900 | -2.04810400 | -1.31343100 |
| H | -8.66094900 | -0.17727200 | -2.10419600 |



|                                              |              |             |                             |
|----------------------------------------------|--------------|-------------|-----------------------------|
| C                                            | -8.25931900  | -2.83321500 | 0.68223900                  |
| H                                            | -6.70216100  | -1.58471200 | 1.46254700                  |
| C                                            | -9.22859200  | -3.00829700 | -0.31091900                 |
| H                                            | -10.12262300 | -2.17158500 | -2.08582100                 |
| H                                            | -8.15301100  | -3.57105800 | 1.47235500                  |
| H                                            | -9.87230100  | -3.88266900 | -0.29677800                 |
| C                                            | -4.89788400  | 2.04654600  | 0.21295200                  |
| H                                            | -4.84031400  | 2.59581400  | 1.16233100                  |
| H                                            | -5.33901800  | 2.70034100  | -0.54160300                 |
| O                                            | -3.54074100  | 1.69748700  | -0.19829700                 |
| H                                            | -0.27428500  | 3.69280300  | 0.35464400                  |
| Zero-point correction=                       |              |             | 0.960376 (Hartree/Particle) |
| Thermal correction to Energy=                |              |             | 1.020334                    |
| Thermal correction to Enthalpy=              |              |             | 1.021278                    |
| Thermal correction to Gibbs Free Energy=     |              |             | 0.854108                    |
| Sum of electronic and zero-point Energies=   |              |             | -2522.861644                |
| Sum of electronic and thermal Energies=      |              |             | -2522.801686                |
| Sum of electronic and thermal Enthalpies=    |              |             | -2522.800742                |
| Sum of electronic and thermal Free Energies= |              |             | -2522.967912                |

#### 8-TS1

|   |             |             |             |
|---|-------------|-------------|-------------|
| C | 0.49470200  | -1.54541000 | -2.15241900 |
| O | -0.55110800 | -1.63378000 | -2.79287600 |
| C | 1.41021900  | -2.71057600 | -2.01582600 |
| C | 1.11077800  | -3.83250600 | -2.81148300 |
| C | 2.50760100  | -2.75595900 | -1.13967500 |
| C | 1.90192000  | -4.97318800 | -2.74125200 |
| H | 0.25956500  | -3.78384300 | -3.48127700 |
| C | 3.29217900  | -3.90552200 | -1.06929200 |
| C | 2.99469200  | -5.01110900 | -1.86892200 |
| H | 1.67143000  | -5.83098000 | -3.36543000 |
| H | 4.13757800  | -3.93377500 | -0.39006800 |
| C | 0.77899800  | -0.23870500 | -1.45061800 |
| C | 1.68720200  | 0.71603600  | -2.25839200 |
| C | 1.76931900  | 2.11370200  | -1.77683400 |
| C | 2.07259600  | 3.26008300  | -1.50701700 |
| C | 2.40451700  | 4.61994500  | -1.21467000 |
| C | 2.91860200  | 4.98052800  | 0.04607100  |
| C | 2.24009200  | 5.61434500  | -2.19951600 |
| C | 3.25223400  | 6.30569700  | 0.31325800  |
| C | 2.57614000  | 6.93705500  | -1.92241900 |
| H | 1.85886100  | 5.33823200  | -3.17750400 |
| C | 3.08082800  | 7.28624700  | -0.66744500 |

|    |             |             |             |
|----|-------------|-------------|-------------|
| H  | 3.65165500  | 6.57486500  | 1.28643600  |
| H  | 2.44873300  | 7.69570100  | -2.68849500 |
| H  | 3.34463000  | 8.31796700  | -0.45598100 |
| H  | 3.61372000  | -5.90199900 | -1.81445800 |
| H  | 2.75782200  | -1.90097700 | -0.52507700 |
| H  | 3.05573300  | 4.21353800  | 0.80089500  |
| Au | 0.34218400  | -0.13807900 | 0.50608900  |
| C  | 0.04892900  | -0.18415000 | 2.55304400  |
| C  | -0.75711300 | 0.09131100  | 4.64636300  |
| C  | 0.39152000  | -0.62467600 | 4.74436300  |
| H  | 0.90672400  | -1.03297200 | 5.59865000  |
| H  | -1.44656600 | 0.43978200  | 5.39801300  |
| N  | -0.95367300 | 0.35279600  | 3.29667700  |
| N  | 0.87186200  | -0.78873900 | 3.45248200  |
| C  | -2.09821500 | 1.08538300  | 2.79135100  |
| C  | -2.02455700 | 2.49115000  | 2.74868200  |
| C  | -3.25455100 | 0.35962800  | 2.43312900  |
| C  | -3.16688800 | 3.17821700  | 2.31816200  |
| C  | -4.36379100 | 1.10215700  | 2.01066900  |
| C  | -4.32340400 | 2.49353100  | 1.95709600  |
| H  | -3.15065700 | 4.26304200  | 2.27918700  |
| H  | -5.27336300 | 0.58398000  | 1.72778300  |
| H  | -5.20339400 | 3.04481800  | 1.63898100  |
| C  | 2.06322700  | -1.55387400 | 3.14103400  |
| C  | 1.94133200  | -2.95297800 | 3.01826600  |
| C  | 3.29499900  | -0.87736400 | 3.03318500  |
| C  | 3.11531600  | -3.67823000 | 2.77953800  |
| C  | 4.43317900  | -1.65610600 | 2.78918100  |
| C  | 4.34780200  | -3.04043000 | 2.66831000  |
| H  | 3.06164800  | -4.75802300 | 2.68392800  |
| H  | 5.40051900  | -1.17139400 | 2.70483200  |
| H  | 5.24680100  | -3.62431500 | 2.49329000  |
| C  | 0.61045200  | -3.68997600 | 3.14299800  |
| C  | 0.60399500  | -4.63437400 | 4.36158400  |
| C  | 0.26015300  | -4.44985300 | 1.84907900  |
| H  | -0.17899100 | -2.94976500 | 3.30264400  |
| H  | 0.81546200  | -4.09532700 | 5.29064600  |
| H  | -0.37397100 | -5.11531100 | 4.46409400  |
| H  | 1.35352800  | -5.42566500 | 4.25929900  |
| H  | 0.22575000  | -3.77528300 | 0.98856500  |
| H  | 0.99269400  | -5.23301900 | 1.62963200  |
| H  | -0.71869900 | -4.93029900 | 1.94780400  |
| C  | 3.43474600  | 0.63215200  | 3.20308100  |
| C  | 4.10343900  | 1.28720200  | 1.97952200  |

|    |             |             |             |
|----|-------------|-------------|-------------|
| C  | 4.19570700  | 0.97314300  | 4.50052400  |
| H  | 2.43221400  | 1.06172200  | 3.28959800  |
| H  | 3.55185500  | 1.07778100  | 1.05772500  |
| H  | 4.14835400  | 2.37321500  | 2.11444900  |
| H  | 5.13160800  | 0.93567600  | 1.84449900  |
| H  | 3.70136500  | 0.54771500  | 5.37961100  |
| H  | 5.21935100  | 0.58533100  | 4.47556900  |
| H  | 4.25313500  | 2.05811300  | 4.63625300  |
| C  | -3.34653200 | -1.15923500 | 2.55671200  |
| C  | -4.06842500 | -1.82247900 | 1.37034500  |
| C  | -4.02368400 | -1.54826300 | 3.88914000  |
| H  | -2.32686700 | -1.55777600 | 2.57474400  |
| H  | -3.63744600 | -1.54191000 | 0.40539000  |
| H  | -4.00230800 | -2.91117100 | 1.46836300  |
| H  | -5.13419600 | -1.57277000 | 1.34876200  |
| H  | -3.49051600 | -1.14309000 | 4.75509800  |
| H  | -5.05215900 | -1.17406800 | 3.92625000  |
| H  | -4.05913900 | -2.63746300 | 3.99462100  |
| C  | -0.78093500 | 3.27390000  | 3.15925500  |
| C  | -1.07309900 | 4.22017300  | 4.34056400  |
| C  | -0.18099600 | 4.04225200  | 1.96668100  |
| H  | -0.02200400 | 2.56148900  | 3.49619200  |
| H  | -1.47078400 | 3.67582400  | 5.20289900  |
| H  | -0.15619000 | 4.72924000  | 4.65467100  |
| H  | -1.80229800 | 4.99023400  | 4.06932900  |
| H  | 0.09499300  | 3.36286700  | 1.15397800  |
| H  | -0.88423700 | 4.78006600  | 1.56638600  |
| H  | 0.71909400  | 4.58306500  | 2.27541400  |
| O  | 1.37022800  | 0.66825700  | -3.61961600 |
| C  | -3.19563200 | 1.62718900  | -2.02359200 |
| C  | -4.12716000 | 2.62416300  | -1.77067700 |
| C  | -3.75127000 | 3.96056100  | -1.64162200 |
| C  | -2.39483100 | 4.25336600  | -1.77354000 |
| C  | -1.46761800 | 3.25601400  | -2.03633600 |
| H  | -4.48047700 | 4.73822700  | -1.45227800 |
| H  | -3.42343200 | 0.56581500  | -2.12934200 |
| H  | -0.40546500 | 3.41652100  | -2.15028000 |
| Cl | -1.83424100 | 5.89232300  | -1.61913700 |
| Cl | -5.80113000 | 2.17622900  | -1.62411700 |
| N  | -1.88407100 | 1.96645200  | -2.16558800 |
| O  | -1.02778100 | 1.02648900  | -2.49335800 |
| C  | 5.98129800  | -1.12784800 | -2.96487600 |
| C  | 5.26309100  | -0.13544900 | -2.41323800 |
| H  | 5.57140500  | -1.61550100 | -3.84970800 |

|                                            |              |             |                             |
|--------------------------------------------|--------------|-------------|-----------------------------|
| H                                          | 5.60259300   | 0.37376500  | -1.51392100                 |
| C                                          | 7.27700600   | -1.65354900 | -2.51767600                 |
| C                                          | 8.04463800   | -1.04912900 | -1.50364000                 |
| C                                          | 7.78239200   | -2.81438100 | -3.13015100                 |
| C                                          | 9.26257500   | -1.59592400 | -1.11184500                 |
| H                                          | 7.69452700   | -0.13647300 | -1.03094400                 |
| C                                          | 9.00166900   | -3.36353100 | -2.73696800                 |
| H                                          | 7.20754000   | -3.28824400 | -3.92190700                 |
| C                                          | 9.74598100   | -2.75676100 | -1.72449300                 |
| H                                          | 9.84444700   | -1.11173500 | -0.33284600                 |
| H                                          | 9.37248200   | -4.26041400 | -3.22420800                 |
| H                                          | 10.69955100  | -3.17749600 | -1.41993300                 |
| C                                          | 3.98047600   | 0.34861600  | -2.99416900                 |
| H                                          | 3.74316500   | -0.14716100 | -3.93827900                 |
| H                                          | 3.99766400   | 1.43290700  | -3.15776000                 |
| O                                          | 2.91611800   | 0.06718900  | -2.02387000                 |
| H                                          | 0.43583200   | 0.94835700  | -3.68237300                 |
| C                                          | -6.13623000  | -3.29880800 | -1.95178500                 |
| C                                          | -5.38095500  | -2.33689800 | -2.50257500                 |
| H                                          | -5.63361000  | -4.20512100 | -1.61127900                 |
| H                                          | -5.82540500  | -1.40017100 | -2.83560400                 |
| C                                          | -7.59067100  | -3.28419700 | -1.73512000                 |
| C                                          | -8.17002100  | -4.30074200 | -0.95554600                 |
| C                                          | -8.43944100  | -2.29840900 | -2.27288100                 |
| C                                          | -9.54142900  | -4.32695600 | -0.70617700                 |
| H                                          | -7.53219500  | -5.07686800 | -0.53949500                 |
| C                                          | -9.80874000  | -2.32342000 | -2.02474600                 |
| H                                          | -8.02786100  | -1.51564200 | -2.90294400                 |
| C                                          | -10.36700800 | -3.33605900 | -1.23839400                 |
| H                                          | -9.96494600  | -5.12263400 | -0.10015700                 |
| H                                          | -10.44680300 | -1.55586900 | -2.45353500                 |
| H                                          | -11.43645900 | -3.35532700 | -1.05110900                 |
| C                                          | -3.90474400  | -2.45976000 | -2.71673600                 |
| H                                          | -3.67953800  | -2.42281100 | -3.79473200                 |
| H                                          | -3.54823200  | -3.42903100 | -2.33997500                 |
| O                                          | -3.23597800  | -1.38095200 | -2.05055000                 |
| H                                          | -2.30934200  | -1.35823500 | -2.35385100                 |
| Zero-point correction=                     |              |             | 1.202298 (Hartree/Particle) |
| Thermal correction to Energy=              |              |             | 1.281671                    |
| Thermal correction to Enthalpy=            |              |             | 1.282615                    |
| Thermal correction to Gibbs Free Energy=   |              |             | 1.067369                    |
| Sum of electronic and zero-point Energies= |              |             | -4189.383221                |
| Sum of electronic and thermal Energies=    |              |             | -4189.303848                |
| Sum of electronic and thermal Enthalpies=  |              |             | -4189.302904                |

Sum of electronic and thermal Free Energies= -4189.518150

8-TS2

|    |             |             |             |
|----|-------------|-------------|-------------|
| C  | 1.67616300  | 0.14374300  | 1.59839800  |
| O  | 1.78781000  | -0.95692600 | 2.13142500  |
| C  | 2.01946900  | 1.41847200  | 2.24959300  |
| C  | 2.84871200  | 1.37046900  | 3.38366400  |
| C  | 1.51308500  | 2.64981400  | 1.80351800  |
| C  | 3.18276800  | 2.54441200  | 4.05043700  |
| H  | 3.22267500  | 0.40859000  | 3.71826700  |
| C  | 1.83819100  | 3.82055600  | 2.48591500  |
| C  | 2.67724400  | 3.76942500  | 3.60256600  |
| H  | 3.83239400  | 2.50853100  | 4.91923800  |
| H  | 1.43556700  | 4.77132000  | 2.15038300  |
| C  | 1.05645800  | -0.05768700 | 0.25089200  |
| C  | 1.97237200  | -0.49836200 | -0.83343400 |
| C  | 1.82804600  | 0.92638100  | -1.23989300 |
| C  | 1.85496500  | 2.10214400  | -1.59109100 |
| C  | 1.87664300  | 3.45466500  | -1.99254800 |
| C  | 0.97890200  | 3.91726700  | -2.98253000 |
| C  | 2.80956500  | 4.34875700  | -1.41712200 |
| C  | 1.02048100  | 5.24633600  | -3.38469800 |
| C  | 2.83565200  | 5.67625300  | -1.82646300 |
| H  | 3.49408800  | 3.98669900  | -0.65760900 |
| C  | 1.94538500  | 6.12458500  | -2.80864800 |
| H  | 0.33681800  | 5.60174900  | -4.14887200 |
| H  | 3.55143100  | 6.36340000  | -1.38695500 |
| H  | 1.97426900  | 7.16181600  | -3.12837100 |
| H  | 2.93394400  | 4.68451400  | 4.12809100  |
| H  | 0.84932100  | 2.68576500  | 0.94718800  |
| H  | 0.27112500  | 3.22393700  | -3.42404600 |
| Au | -0.96325700 | -0.30290300 | 0.10392200  |
| C  | -2.96091400 | -0.74346400 | 0.01017800  |
| C  | -4.86101300 | -1.94031800 | -0.23879000 |
| C  | -5.21684900 | -0.67269800 | 0.09677600  |
| H  | -6.18410200 | -0.21926600 | 0.24194500  |
| H  | -5.45577200 | -2.81595400 | -0.44306800 |
| N  | -3.47460300 | -1.96629500 | -0.28866200 |
| N  | -4.03924100 | 0.04829200  | 0.24607500  |
| C  | -2.68685000 | -3.13989000 | -0.61234600 |
| C  | -2.37216900 | -3.38434500 | -1.96488900 |
| C  | -2.28311400 | -3.98896700 | 0.43768400  |
| C  | -1.62461800 | -4.53433000 | -2.24923900 |

|   |             |             |             |
|---|-------------|-------------|-------------|
| C | -1.53618400 | -5.12226600 | 0.09108400  |
| C | -1.21121500 | -5.39459700 | -1.23490400 |
| H | -1.36841900 | -4.76095700 | -3.27943100 |
| H | -1.20750100 | -5.80090000 | 0.87182900  |
| H | -0.63643700 | -6.28299700 | -1.47962700 |
| C | -3.98463500 | 1.45273400  | 0.59718800  |
| C | -3.93297300 | 1.80344800  | 1.96078900  |
| C | -4.00996700 | 2.40455000  | -0.44158300 |
| C | -3.89354500 | 3.16945800  | 2.26764000  |
| C | -3.96770700 | 3.75488900  | -0.07326100 |
| C | -3.90933900 | 4.13493300  | 1.26493700  |
| H | -3.85388700 | 3.47944300  | 3.30721400  |
| H | -3.98727400 | 4.51773700  | -0.84553800 |
| H | -3.88316300 | 5.18834300  | 1.52789500  |
| C | -3.92383800 | 0.77333000  | 3.08610600  |
| C | -5.16542200 | 0.91424100  | 3.98905800  |
| C | -2.62441900 | 0.85115400  | 3.91102600  |
| H | -3.96195500 | -0.22399400 | 2.63795800  |
| H | -6.09266600 | 0.82741300  | 3.41385800  |
| H | -5.16723700 | 0.13239300  | 4.75516800  |
| H | -5.18232200 | 1.88090600  | 4.50266600  |
| H | -1.74242300 | 0.71236800  | 3.27775900  |
| H | -2.52706800 | 1.81750500  | 4.41643000  |
| H | -2.61675500 | 0.07254800  | 4.68058000  |
| C | -4.08387100 | 2.02254000  | -1.91714400 |
| C | -2.80885800 | 2.44899200  | -2.67099200 |
| C | -5.34656500 | 2.59609500  | -2.58927000 |
| H | -4.14818200 | 0.93264500  | -1.98700700 |
| H | -1.91785000 | 1.99534300  | -2.22417500 |
| H | -2.86490900 | 2.13546500  | -3.71892500 |
| H | -2.68097900 | 3.53665500  | -2.65346400 |
| H | -6.25596300 | 2.27238000  | -2.07359500 |
| H | -5.33984600 | 3.69075800  | -2.59423200 |
| H | -5.40903800 | 2.26068700  | -3.62946800 |
| C | -2.62314800 | -3.72682100 | 1.90162000  |
| C | -1.35186200 | -3.55906000 | 2.75700300  |
| C | -3.53566100 | -4.83146900 | 2.47068800  |
| H | -3.17827700 | -2.78580400 | 1.96104500  |
| H | -0.70917400 | -2.75987600 | 2.37454600  |
| H | -1.62230300 | -3.31415900 | 3.78933700  |
| H | -0.75985200 | -4.47975700 | 2.78287500  |
| H | -4.45806700 | -4.93043600 | 1.88949900  |
| H | -3.03536500 | -5.80519300 | 2.46841200  |
| H | -3.80947700 | -4.60202300 | 3.50544500  |

|   |             |             |             |
|---|-------------|-------------|-------------|
| C | -2.82097400 | -2.47033000 | -3.10149700 |
| C | -3.88720000 | -3.15883800 | -3.97705300 |
| C | -1.63176300 | -1.98626500 | -3.95352600 |
| H | -3.28277600 | -1.58157100 | -2.66103500 |
| H | -4.75959400 | -3.45977600 | -3.38815900 |
| H | -4.22884600 | -2.48223900 | -4.76714500 |
| H | -3.48595200 | -4.05714800 | -4.45744600 |
| H | -0.86523700 | -1.50381700 | -3.33948600 |
| H | -1.15879300 | -2.81354400 | -4.49266500 |
| H | -1.97604200 | -1.26576700 | -4.70283400 |
| O | 1.45107200  | -1.33875200 | -1.82078100 |
| C | 6.67365100  | -0.83186300 | -0.82091900 |
| C | 5.49783500  | -1.47864000 | -0.82858200 |
| H | 6.70336500  | 0.16858000  | -1.25481700 |
| H | 5.39726400  | -2.47578200 | -0.40654100 |
| C | 7.96169700  | -1.30869400 | -0.30026400 |
| C | 9.07762400  | -0.45736100 | -0.38083100 |
| C | 8.13592700  | -2.57916900 | 0.28048800  |
| C | 10.32371700 | -0.85445700 | 0.10157500  |
| H | 8.96213600  | 0.52675800  | -0.82854500 |
| C | 9.37893400  | -2.97590200 | 0.76316800  |
| H | 7.29586700  | -3.26296300 | 0.35437100  |
| C | 10.47873100 | -2.11613400 | 0.67638800  |
| H | 11.17180800 | -0.18021500 | 0.02750600  |
| H | 9.49381300  | -3.96029900 | 1.20741600  |
| H | 11.44764500 | -2.43052100 | 1.05241100  |
| C | 4.26147600  | -0.90610200 | -1.43593800 |
| H | 3.87772900  | -1.53523300 | -2.24747700 |
| H | 4.44083300  | 0.10178400  | -1.83136500 |
| O | 3.23985300  | -0.83836400 | -0.39966300 |
| H | 1.17158500  | -2.15783300 | -1.38254400 |

|                                              |                             |
|----------------------------------------------|-----------------------------|
| Zero-point correction=                       | 0.958586 (Hartree/Particle) |
| Thermal correction to Energy=                | 1.018151                    |
| Thermal correction to Enthalpy=              | 1.019095                    |
| Thermal correction to Gibbs Free Energy=     | 0.852285                    |
| Sum of electronic and zero-point Energies=   | -2522.811353                |
| Sum of electronic and thermal Energies=      | -2522.751788                |
| Sum of electronic and thermal Enthalpies=    | -2522.750844                |
| Sum of electronic and thermal Free Energies= | -2522.917654                |

8-TS3

|    |             |             |             |
|----|-------------|-------------|-------------|
| C  | 1.67434200  | -1.89446300 | -0.77405700 |
| O  | 1.71354800  | -2.21966700 | -1.96635400 |
| C  | 2.07975600  | -2.73854800 | 0.35144400  |
| C  | 2.51526600  | -4.04902200 | 0.09291300  |
| C  | 2.06597600  | -2.24308500 | 1.66599700  |
| C  | 2.92691400  | -4.85733000 | 1.14652300  |
| H  | 2.52571900  | -4.40698200 | -0.93128900 |
| C  | 2.48341000  | -3.05587700 | 2.71599700  |
| C  | 2.91111300  | -4.36139300 | 2.45526100  |
| H  | 3.26443900  | -5.87062700 | 0.95365100  |
| H  | 2.48113700  | -2.67597400 | 3.73249200  |
| C  | 1.09297900  | -0.53043600 | -0.58550700 |
| C  | 2.03108800  | 0.57975900  | -1.01180700 |
| C  | 1.73198700  | 1.89954400  | -0.46087500 |
| C  | 1.59056300  | 3.00039800  | 0.02882200  |
| C  | 1.42782700  | 4.30619900  | 0.58368300  |
| C  | 1.18519000  | 5.40770200  | -0.25959100 |
| C  | 1.52277400  | 4.50721600  | 1.97437900  |
| C  | 1.03800500  | 6.68168400  | 0.28334300  |
| C  | 1.36909100  | 5.78494200  | 2.50707400  |
| H  | 1.72100000  | 3.66049100  | 2.62356100  |
| C  | 1.12638700  | 6.87337500  | 1.66485800  |
| H  | 0.85992400  | 7.52833000  | -0.37276400 |
| H  | 1.44683000  | 5.93346200  | 3.57978300  |
| H  | 1.01384800  | 7.86895200  | 2.08317600  |
| H  | 3.23715300  | -4.99438100 | 3.27517000  |
| H  | 1.73863700  | -1.22555100 | 1.86520400  |
| H  | 1.11947600  | 5.25292200  | -1.33141500 |
| Au | -0.86327400 | -0.35121700 | -0.25146000 |
| C  | -2.89935500 | -0.25920300 | -0.00700100 |
| C  | -5.03362700 | 0.46549300  | 0.08994700  |
| C  | -5.05229000 | -0.88587200 | 0.24766700  |
| H  | -5.86938500 | -1.57345500 | 0.39539000  |
| H  | -5.83066000 | 1.19134500  | 0.07489800  |
| N  | -3.70747100 | 0.83249700  | -0.06468300 |
| N  | -3.73703900 | -1.31419200 | 0.18550500  |
| C  | -3.26749800 | 2.19989900  | -0.26701100 |
| C  | -2.99380400 | 2.98865000  | 0.86813900  |
| C  | -3.17111100 | 2.68476900  | -1.58630700 |
| C  | -2.59618700 | 4.31182400  | 0.64361600  |
| C  | -2.77787800 | 4.01927600  | -1.74617500 |
| C  | -2.49228800 | 4.82337700  | -0.64689000 |
| H  | -2.36341400 | 4.94978600  | 1.48987100  |
| H  | -2.69531900 | 4.43171700  | -2.74678900 |



|   |             |             |             |
|---|-------------|-------------|-------------|
| H | -2.18529200 | 5.85407000  | -0.79450200 |
| C | -3.33425200 | -2.70310200 | 0.30104000  |
| C | -3.24298400 | -3.47562500 | -0.87453400 |
| C | -3.09298500 | -3.22552300 | 1.58750000  |
| C | -2.89483400 | -4.82392900 | -0.72519100 |
| C | -2.75178800 | -4.58083500 | 1.67239400  |
| C | -2.65468400 | -5.37255600 | 0.53139200  |
| H | -2.81674500 | -5.45286100 | -1.60630700 |
| H | -2.56282900 | -5.02154200 | 2.64607900  |
| H | -2.39258900 | -6.42248000 | 0.62199900  |
| C | -3.52476000 | -2.91548800 | -2.26581400 |
| C | -4.81840200 | -3.51605600 | -2.85244200 |
| C | -2.33475400 | -3.12363300 | -3.22247300 |
| H | -3.67793500 | -1.83572100 | -2.17612300 |
| H | -5.67907700 | -3.33319900 | -2.20112000 |
| H | -5.03404700 | -3.07517900 | -3.83096800 |
| H | -4.72856200 | -4.59882200 | -2.98694500 |
| H | -1.41290100 | -2.69182900 | -2.82025900 |
| H | -2.15020300 | -4.18543200 | -3.41417300 |
| H | -2.54111000 | -2.64849900 | -4.18687500 |
| C | -3.20281300 | -2.38965700 | 2.85917800  |
| C | -1.89630500 | -2.41711500 | 3.67555900  |
| C | -4.40182400 | -2.83654000 | 3.71956600  |
| H | -3.37764700 | -1.34874800 | 2.57044100  |
| H | -1.04021500 | -2.10550700 | 3.06875700  |
| H | -1.97381300 | -1.74211100 | 4.53405800  |
| H | -1.68287700 | -3.41825200 | 4.06353100  |
| H | -5.34201600 | -2.77605400 | 3.16226200  |
| H | -4.28423300 | -3.87060200 | 4.05943100  |
| H | -4.49283500 | -2.20193400 | 4.60698400  |
| C | -3.48015200 | 1.83443800  | -2.81475900 |
| C | -2.25554000 | 1.71495700  | -3.74313400 |
| C | -4.70518800 | 2.37633100  | -3.57824400 |
| H | -3.73018300 | 0.82329800  | -2.47902300 |
| H | -1.38464200 | 1.31769000  | -3.21244000 |
| H | -2.48073300 | 1.04719000  | -4.58114400 |
| H | -1.97460700 | 2.68610000  | -4.16337300 |
| H | -5.58946800 | 2.42946400  | -2.93511200 |
| H | -4.51953200 | 3.38132100  | -3.97070300 |
| H | -4.94197600 | 1.72730600  | -4.42742100 |
| C | -3.10548300 | 2.46111900  | 2.29586100  |
| C | -4.08732200 | 3.29704200  | 3.13970600  |
| C | -1.72115900 | 2.38192300  | 2.96902900  |
| H | -3.50350900 | 1.44248600  | 2.25605300  |

|                                              |             |             |                             |
|----------------------------------------------|-------------|-------------|-----------------------------|
| H                                            | -5.07711900 | 3.34384100  | 2.67500900                  |
| H                                            | -4.20041800 | 2.85639300  | 4.13541200                  |
| H                                            | -3.73338600 | 4.32422500  | 3.27265100                  |
| H                                            | -1.04292700 | 1.73717300  | 2.40050400                  |
| H                                            | -1.25651900 | 3.37034000  | 3.04227100                  |
| H                                            | -1.81245700 | 1.97660800  | 3.98237300                  |
| O                                            | 1.66830700  | 0.55546500  | -2.40213100                 |
| C                                            | 6.72328300  | 0.63924000  | -0.37706100                 |
| C                                            | 5.68834600  | 0.31610100  | -1.16839300                 |
| H                                            | 6.59033300  | 1.47488400  | 0.31126800                  |
| H                                            | 5.74901000  | -0.51384600 | -1.86872200                 |
| C                                            | 8.04538900  | 0.00269400  | -0.31706400                 |
| C                                            | 8.96490800  | 0.45007600  | 0.64785600                  |
| C                                            | 8.44032200  | -1.03714000 | -1.17990200                 |
| C                                            | 10.23128900 | -0.12222100 | 0.75628600                  |
| H                                            | 8.67887100  | 1.25577100  | 1.31949700                  |
| C                                            | 9.70399600  | -1.60903100 | -1.07218800                 |
| H                                            | 7.75913700  | -1.39649900 | -1.94520800                 |
| C                                            | 10.60518400 | -1.15535900 | -0.10345800                 |
| H                                            | 10.92516200 | 0.23975700  | 1.50913600                  |
| H                                            | 9.99177400  | -2.40856800 | -1.74859200                 |
| H                                            | 11.59167600 | -1.60221600 | -0.02478300                 |
| C                                            | 4.40480800  | 1.07572900  | -1.16746800                 |
| H                                            | 4.16728300  | 1.46734300  | -2.16418300                 |
| H                                            | 4.43110000  | 1.91029300  | -0.45952600                 |
| O                                            | 3.33708800  | 0.15666800  | -0.77902000                 |
| H                                            | 1.90182900  | -0.33574000 | -2.73760800                 |
| Zero-point correction=                       |             |             | 0.959148 (Hartree/Particle) |
| Thermal correction to Energy=                |             |             | 1.018400                    |
| Thermal correction to Enthalpy=              |             |             | 1.019344                    |
| Thermal correction to Gibbs Free Energy=     |             |             | 0.853073                    |
| Sum of electronic and zero-point Energies=   |             |             | -2522.804787                |
| Sum of electronic and thermal Energies=      |             |             | -2522.745536                |
| Sum of electronic and thermal Enthalpies=    |             |             | -2522.744591                |
| Sum of electronic and thermal Free Energies= |             |             | -2522.910862                |

#### 8-TS4

|   |             |             |             |
|---|-------------|-------------|-------------|
| C | -0.32855700 | -3.16459800 | -0.09695600 |
| O | -0.23788000 | -3.58427500 | 1.05462800  |
| C | -1.00643500 | -3.85787100 | -1.20477900 |
| C | -0.93019900 | -3.36991400 | -2.51938300 |
| C | -1.72540800 | -5.03206200 | -0.92691000 |

|    |             |             |             |
|----|-------------|-------------|-------------|
| C  | -1.57359300 | -4.05139200 | -3.54925100 |
| H  | -0.35730900 | -2.47268100 | -2.73955400 |
| C  | -2.36499400 | -5.70896500 | -1.95965200 |
| C  | -2.28988600 | -5.21863300 | -3.26847800 |
| H  | -1.51132000 | -3.68215200 | -4.56788700 |
| H  | -2.91993200 | -6.61829700 | -1.75136100 |
| C  | 0.29597300  | -1.81940000 | -0.29662000 |
| C  | 1.77860900  | -1.85095800 | -0.63695800 |
| C  | 2.18937700  | -0.77870600 | -1.53885700 |
| C  | 2.57570800  | 0.04684600  | -2.34100600 |
| C  | 3.06044700  | 0.99028100  | -3.29548900 |
| C  | 3.30361300  | 0.58327500  | -4.62227900 |
| C  | 3.31880300  | 2.32326500  | -2.92026400 |
| C  | 3.78866800  | 1.49765200  | -5.55306500 |
| C  | 3.81021300  | 3.22679300  | -3.85881200 |
| H  | 3.13325300  | 2.63523400  | -1.89780300 |
| C  | 4.04374300  | 2.81838800  | -5.17489900 |
| H  | 3.97327700  | 1.17836000  | -6.57401100 |
| H  | 4.01633600  | 4.25132200  | -3.56391500 |
| H  | 4.42737200  | 3.52664800  | -5.90282300 |
| H  | -2.78805800 | -5.75131800 | -4.07311700 |
| H  | -1.76501200 | -5.39230800 | 0.09591700  |
| H  | 3.11229600  | -0.44594700 | -4.90770400 |
| Au | -0.84988600 | -0.23931700 | 0.15186600  |
| C  | -2.14859100 | 1.26291600  | 0.68748200  |
| C  | -3.07410800 | 3.23344100  | 1.29032500  |
| C  | -4.05926200 | 2.29623300  | 1.30719000  |
| H  | -5.10825300 | 2.37112500  | 1.54448600  |
| H  | -3.09119800 | 4.28857400  | 1.51122000  |
| N  | -1.91049300 | 2.58327500  | 0.90968000  |
| N  | -3.47611300 | 1.09573200  | 0.93610300  |
| C  | -0.62372100 | 3.23530600  | 0.77788600  |
| C  | 0.20236500  | 3.32232500  | 1.91678600  |
| C  | -0.27158700 | 3.77571000  | -0.47431100 |
| C  | 1.44050100  | 3.95750700  | 1.75940600  |
| C  | 0.97631000  | 4.40555400  | -0.56829900 |
| C  | 1.82555400  | 4.49159300  | 0.53213400  |
| H  | 2.10586900  | 4.04586700  | 2.61259600  |
| H  | 1.28065600  | 4.83977300  | -1.51538500 |
| H  | 2.78595600  | 4.99009200  | 0.43791300  |
| C  | -4.20330100 | -0.15530000 | 0.82573200  |
| C  | -4.84444400 | -0.44974600 | -0.39437000 |
| C  | -4.26423200 | -1.00014900 | 1.95225800  |
| C  | -5.57257900 | -1.64397700 | -0.46091800 |

|   |             |             |             |
|---|-------------|-------------|-------------|
| C | -5.00778200 | -2.17997200 | 1.82394900  |
| C | -5.65650000 | -2.49891000 | 0.63438400  |
| H | -6.08218500 | -1.90511000 | -1.38300100 |
| H | -5.08193100 | -2.85476000 | 2.67058000  |
| H | -6.23183100 | -3.41702000 | 0.56132600  |
| C | -4.77493800 | 0.46263300  | -1.61545000 |
| C | -6.16595800 | 1.01168900  | -1.98925900 |
| C | -4.11772000 | -0.24927400 | -2.81395900 |
| H | -4.14368500 | 1.32143500  | -1.36796500 |
| H | -6.62146800 | 1.55367200  | -1.15439700 |
| H | -6.08874300 | 1.69906200  | -2.83779400 |
| H | -6.85125000 | 0.20726200  | -2.27521300 |
| H | -3.12173200 | -0.62379500 | -2.55664100 |
| H | -4.71664000 | -1.10018400 | -3.15399600 |
| H | -4.01706700 | 0.44238600  | -3.65683300 |
| C | -3.58577400 | -0.67347500 | 3.27922800  |
| C | -2.65347300 | -1.80865800 | 3.74491500  |
| C | -4.62790200 | -0.33041700 | 4.36338000  |
| H | -2.96243200 | 0.21430600  | 3.13517300  |
| H | -1.90801000 | -2.05963300 | 2.98391600  |
| H | -2.12532000 | -1.50941400 | 4.65606500  |
| H | -3.21213500 | -2.72072100 | 3.97794600  |
| H | -5.26289200 | 0.50889100  | 4.06161100  |
| H | -5.28242000 | -1.18338200 | 4.57028900  |
| H | -4.12919600 | -0.05847600 | 5.29930100  |
| C | -1.18702100 | 3.71460800  | -1.69371700 |
| C | -0.55639000 | 2.89545600  | -2.83611700 |
| C | -1.58019800 | 5.12626100  | -2.17268200 |
| H | -2.10994900 | 3.20413400  | -1.40280300 |
| H | -0.30976100 | 1.88030600  | -2.50922800 |
| H | -1.25227400 | 2.82419100  | -3.67853100 |
| H | 0.36421500  | 3.35856100  | -3.20471500 |
| H | -2.05546900 | 5.70452300  | -1.37409000 |
| H | -0.70856800 | 5.69099600  | -2.51855900 |
| H | -2.28392100 | 5.06018200  | -3.00851300 |
| C | -0.20785300 | 2.78618100  | 3.28610400  |
| C | -0.30805500 | 3.92262000  | 4.32332400  |
| C | 0.74013200  | 1.67376600  | 3.77298700  |
| H | -1.20373200 | 2.34226000  | 3.19620700  |
| H | -1.00308600 | 4.70296500  | 3.99790200  |
| H | -0.66242400 | 3.53083900  | 5.28196500  |
| H | 0.66375900  | 4.39542900  | 4.49722300  |
| H | 0.75714900  | 0.83352500  | 3.07162900  |
| H | 1.76501900  | 2.04145400  | 3.88938900  |

|                                              |             |             |                             |
|----------------------------------------------|-------------|-------------|-----------------------------|
| H                                            | 0.41189700  | 1.29504600  | 4.74626100                  |
| O                                            | 2.22748000  | -3.05864300 | -1.17924100                 |
| O                                            | 2.20305100  | -1.77547200 | 0.72595300                  |
| H                                            | 2.32125900  | -3.68252200 | -0.44146900                 |
| C                                            | 2.96188300  | -0.61463900 | 1.21372900                  |
| H                                            | 2.59381400  | 0.27908900  | 0.70095200                  |
| H                                            | 2.70351000  | -0.55572900 | 2.27223200                  |
| C                                            | 5.25573300  | -1.11970600 | 2.02829500                  |
| C                                            | 4.42280100  | -0.83266400 | 1.01109900                  |
| H                                            | 4.82439200  | -1.19120300 | 3.02763100                  |
| H                                            | 4.78265200  | -0.75648700 | -0.01167800                 |
| C                                            | 6.70316900  | -1.34189500 | 1.97178000                  |
| C                                            | 7.38958100  | -1.60791500 | 3.17069400                  |
| C                                            | 7.44291900  | -1.30433500 | 0.77354100                  |
| C                                            | 8.76509000  | -1.83028300 | 3.17760200                  |
| H                                            | 6.83322000  | -1.64137700 | 4.10407900                  |
| C                                            | 8.81565900  | -1.52643600 | 0.78044900                  |
| H                                            | 6.94284600  | -1.10268200 | -0.16870100                 |
| C                                            | 9.48293300  | -1.78992800 | 1.98166000                  |
| H                                            | 9.27509300  | -2.03497000 | 4.11401900                  |
| H                                            | 9.37061200  | -1.49525600 | -0.15246800                 |
| H                                            | 10.55487800 | -1.96269500 | 1.98222200                  |
| Zero-point correction=                       |             |             | 0.958158 (Hartree/Particle) |
| Thermal correction to Energy=                |             |             | 1.017871                    |
| Thermal correction to Enthalpy=              |             |             | 1.018815                    |
| Thermal correction to Gibbs Free Energy=     |             |             | 0.849792                    |
| Sum of electronic and zero-point Energies=   |             |             | -2522.796862                |
| Sum of electronic and thermal Energies=      |             |             | -2522.737149                |
| Sum of electronic and thermal Enthalpies=    |             |             | -2522.736205                |
| Sum of electronic and thermal Free Energies= |             |             | -2522.905228                |

#### 8-INT1

|   |            |             |             |
|---|------------|-------------|-------------|
| C | 2.97017500 | -2.89634100 | -0.05909400 |
| O | 3.86816900 | -2.69795900 | -0.86549200 |
| C | 2.82642900 | -4.20241600 | 0.65001900  |
| C | 3.50411800 | -5.31354900 | 0.11846900  |
| C | 2.10593900 | -4.34131800 | 1.84962200  |
| C | 3.44431600 | -6.54520100 | 0.76169500  |
| H | 4.07463000 | -5.18318600 | -0.79507500 |
| C | 2.06153200 | -5.57476400 | 2.49887000  |
| C | 2.72273400 | -6.67738700 | 1.95310000  |
| H | 3.96475400 | -7.40131900 | 0.34354100  |
| H | 1.52040700 | -5.67345600 | 3.43506200  |

|    |             |             |             |
|----|-------------|-------------|-------------|
| C  | 1.93404600  | -1.82490600 | 0.18053000  |
| C  | 2.25541200  | -0.50724300 | 0.25120000  |
| C  | 1.27335800  | 0.55185600  | 0.36246000  |
| C  | 1.02272800  | 1.76789100  | 0.50986500  |
| C  | 0.83612600  | 3.16132600  | 0.74317600  |
| C  | 0.72321100  | 4.06125300  | -0.33771200 |
| C  | 0.82337900  | 3.65121100  | 2.06666100  |
| C  | 0.60225400  | 5.42467400  | -0.09279300 |
| C  | 0.70450800  | 5.01757400  | 2.29754900  |
| H  | 0.91839500  | 2.95497600  | 2.89325800  |
| C  | 0.59325900  | 5.90308100  | 1.22131700  |
| H  | 0.52139200  | 6.11715900  | -0.92460000 |
| H  | 0.70344400  | 5.39415500  | 3.31541500  |
| H  | 0.50362600  | 6.96917200  | 1.40672600  |
| H  | 2.68379400  | -7.63744200 | 2.45925600  |
| H  | 1.60110100  | -3.48589700 | 2.28598300  |
| H  | 0.73816100  | 3.68072700  | -1.35372300 |
| Au | -0.90685800 | 0.35371800  | 0.04984500  |
| C  | -2.85101100 | -0.12710300 | -0.28928300 |
| C  | -5.09634800 | -0.02098000 | -0.49744300 |
| C  | -4.71922200 | -1.28830400 | -0.80408900 |
| H  | -5.29343500 | -2.15063800 | -1.10195300 |
| H  | -6.06675100 | 0.44784500  | -0.47355500 |
| N  | -3.93864700 | 0.68001200  | -0.18530400 |
| N  | -3.33745700 | -1.33913200 | -0.67033100 |
| C  | -3.92050900 | 2.08213900  | 0.18314300  |
| C  | -3.98197100 | 2.41980400  | 1.54965500  |
| C  | -3.87526000 | 3.04249200  | -0.84709200 |
| C  | -3.98584600 | 3.78314600  | 1.86956300  |
| C  | -3.88192700 | 4.38956600  | -0.46486500 |
| C  | -3.93547800 | 4.75750200  | 0.87666200  |
| H  | -4.03569000 | 4.08448100  | 2.91124200  |
| H  | -3.85025200 | 5.15936200  | -1.22965700 |
| H  | -3.94509300 | 5.80855100  | 1.14954200  |
| C  | -2.54452400 | -2.52941300 | -0.90299800 |
| C  | -1.97754500 | -2.72152700 | -2.17938200 |
| C  | -2.38920200 | -3.44797600 | 0.15466200  |
| C  | -1.20881600 | -3.87669500 | -2.37090300 |
| C  | -1.61367900 | -4.58872300 | -0.09719200 |
| C  | -1.02441300 | -4.80005600 | -1.34361000 |
| H  | -0.75539600 | -4.05861500 | -3.33995300 |
| H  | -1.47257600 | -5.32189700 | 0.69047300  |
| H  | -0.43076500 | -5.69279300 | -1.51718500 |
| C  | -2.17845700 | -1.74924900 | -3.33759200 |

|   |             |             |             |
|---|-------------|-------------|-------------|
| C | -2.97237500 | -2.40786600 | -4.48381200 |
| C | -0.83808000 | -1.18233400 | -3.84414100 |
| H | -2.77048500 | -0.90389900 | -2.97513500 |
| H | -3.94215100 | -2.78038000 | -4.13923000 |
| H | -3.15208500 | -1.68392900 | -5.28489700 |
| H | -2.42605800 | -3.25235300 | -4.91611200 |
| H | -0.28181300 | -0.69543300 | -3.03681100 |
| H | -0.20107700 | -1.96652300 | -4.26584000 |
| H | -1.01462600 | -0.44335200 | -4.63215400 |
| C | -3.02308100 | -3.25211400 | 1.52864500  |
| C | -1.96521800 | -3.23405600 | 2.64918000  |
| C | -4.10280400 | -4.31869900 | 1.80046300  |
| H | -3.51755500 | -2.27641000 | 1.53982000  |
| H | -1.19615200 | -2.48081000 | 2.45590700  |
| H | -2.43897100 | -3.00821900 | 3.60980100  |
| H | -1.46902400 | -4.20512900 | 2.75008200  |
| H | -4.88276200 | -4.30847400 | 1.03254600  |
| H | -3.67266500 | -5.32523700 | 1.82276300  |
| H | -4.57884600 | -4.13896200 | 2.76955300  |
| C | -3.82514900 | 2.67538500  | -2.32766200 |
| C | -2.52158400 | 3.16756900  | -2.98549200 |
| C | -5.06194300 | 3.20082400  | -3.08281300 |
| H | -3.83428700 | 1.58455200  | -2.41193500 |
| H | -1.64439900 | 2.75891400  | -2.47369900 |
| H | -2.48292800 | 2.85517400  | -4.03407400 |
| H | -2.44814700 | 4.25972200  | -2.96253000 |
| H | -5.99113100 | 2.82572700  | -2.64241300 |
| H | -5.10661600 | 4.29443400  | -3.06918000 |
| H | -5.03073200 | 2.88374100  | -4.13010100 |
| C | -4.05764200 | 1.38023900  | 2.66386600  |
| C | -5.39398800 | 1.47391000  | 3.42708700  |
| C | -2.85937400 | 1.49159600  | 3.62619800  |
| H | -4.01227300 | 0.38610600  | 2.20919200  |
| H | -6.24948200 | 1.35502600  | 2.75476800  |
| H | -5.45159000 | 0.69202100  | 4.19112100  |
| H | -5.50030800 | 2.43952500  | 3.93174300  |
| H | -1.90971800 | 1.39227100  | 3.09019400  |
| H | -2.85200200 | 2.45288800  | 4.15007500  |
| H | -2.90788300 | 0.70305600  | 4.38409000  |
| O | 0.63142000  | -2.19645300 | 0.33772500  |
| C | 6.25151800  | 1.79502900  | -0.63819200 |
| C | 5.60609600  | 0.61876500  | -0.62966600 |
| H | 5.65730400  | 2.69862400  | -0.78219100 |
| H | 6.13188600  | -0.32018500 | -0.47565700 |

|                                              |             |             |                             |
|----------------------------------------------|-------------|-------------|-----------------------------|
| C                                            | 7.69203300  | 2.03189300  | -0.47390400                 |
| C                                            | 8.15719600  | 3.35766200  | -0.42471000                 |
| C                                            | 8.63491700  | 0.99286900  | -0.35979800                 |
| C                                            | 9.51200600  | 3.64109800  | -0.25939000                 |
| H                                            | 7.44349000  | 4.17308200  | -0.51488400                 |
| C                                            | 9.98730100  | 1.27482200  | -0.19444300                 |
| H                                            | 8.30984800  | -0.04188800 | -0.40616500                 |
| C                                            | 10.43281200 | 2.59956800  | -0.14248600                 |
| H                                            | 9.84779600  | 4.67331500  | -0.22317800                 |
| H                                            | 10.69958900 | 0.45933500  | -0.10893900                 |
| H                                            | 11.48942600 | 2.81515400  | -0.01518200                 |
| C                                            | 4.13652700  | 0.49341700  | -0.84640600                 |
| H                                            | 3.91543100  | -0.16922900 | -1.69161700                 |
| H                                            | 3.67213000  | 1.47344300  | -1.01717400                 |
| O                                            | 3.55881200  | -0.11782400 | 0.34505700                  |
| H                                            | 0.47554700  | -3.09851000 | 0.01584100                  |
| Zero-point correction=                       |             |             | 0.959776 (Hartree/Particle) |
| Thermal correction to Energy=                |             |             | 1.020007                    |
| Thermal correction to Enthalpy=              |             |             | 1.020951                    |
| Thermal correction to Gibbs Free Energy=     |             |             | 0.851074                    |
| Sum of electronic and zero-point Energies=   |             |             | -2522.859960                |
| Sum of electronic and thermal Energies=      |             |             | -2522.799729                |
| Sum of electronic and thermal Enthalpies=    |             |             | -2522.798785                |
| Sum of electronic and thermal Free Energies= |             |             | -2522.968662                |

## 1-INT6

|   |             |             |             |
|---|-------------|-------------|-------------|
| C | 0.36921200  | -1.57927300 | 0.94694600  |
| O | 0.68747800  | -2.52769100 | 0.12686800  |
| C | 0.05573600  | -2.04639100 | 2.30975300  |
| C | 0.72145900  | -3.20412400 | 2.75548900  |
| C | -0.85630900 | -1.39739400 | 3.16117300  |
| C | 0.48489100  | -3.69104800 | 4.03846700  |
| H | 1.43768300  | -3.68852000 | 2.10223400  |
| C | -1.10085600 | -1.90572900 | 4.43378900  |
| C | -0.42731800 | -3.04777000 | 4.87714700  |
| H | 1.01604400  | -4.57306200 | 4.38225200  |
| H | -1.82049700 | -1.41032100 | 5.07851900  |
| C | 0.36695000  | -0.18746400 | 0.52465300  |
| C | 1.09368800  | 0.07121400  | -0.77509000 |
| C | 0.43684900  | 0.85697400  | 1.51230100  |
| C | 0.50639100  | 1.77120500  | 2.30877800  |
| C | 0.60047300  | 2.84245400  | 3.24441400  |



|    |             |             |             |
|----|-------------|-------------|-------------|
| C  | 0.98594600  | 4.12894000  | 2.81618900  |
| C  | 0.31435700  | 2.63354700  | 4.60848400  |
| C  | 1.07608700  | 5.17454600  | 3.73126900  |
| C  | 0.40715400  | 3.68653500  | 5.51483900  |
| H  | 0.03191800  | 1.64039500  | 4.94343500  |
| C  | 0.78621200  | 4.95957500  | 5.08125300  |
| H  | 1.38002400  | 6.15996700  | 3.39009400  |
| H  | 0.18917900  | 3.51205400  | 6.56473500  |
| H  | 0.86172500  | 5.77736800  | 5.79198300  |
| H  | -0.61363300 | -3.43392300 | 5.87529600  |
| H  | -1.38414200 | -0.51282300 | 2.82616500  |
| H  | 1.22283400  | 4.28789400  | 1.76917100  |
| Au | -1.74293800 | -0.12233600 | -0.17203900 |
| C  | -3.62497600 | 0.04256500  | -0.88699400 |
| C  | -5.37374200 | 0.15964300  | -2.30776700 |
| C  | -5.86054500 | 0.30954900  | -1.04858000 |
| H  | -6.86444000 | 0.45954900  | -0.68589700 |
| H  | -5.86746100 | 0.15163900  | -3.26596500 |
| N  | -3.99972700 | -0.00220100 | -2.19195700 |
| N  | -4.77367500 | 0.23458200  | -0.18654200 |
| C  | -3.09582600 | -0.18932100 | -3.31125800 |
| C  | -2.54939600 | 0.95320200  | -3.92882400 |
| C  | -2.80389700 | -1.50336200 | -3.72746800 |
| C  | -1.68146500 | 0.74267200  | -5.00684900 |
| C  | -1.92369800 | -1.65006100 | -4.80655900 |
| C  | -1.36812900 | -0.54259400 | -5.43995100 |
| H  | -1.23725200 | 1.59792300  | -5.50644400 |
| H  | -1.66184700 | -2.64660900 | -5.14713800 |
| H  | -0.68255700 | -0.68247600 | -6.27020800 |
| C  | -4.86183600 | 0.33764200  | 1.25557000  |
| C  | -5.12695000 | -0.83252700 | 1.99480000  |
| C  | -4.69084100 | 1.60278700  | 1.85265100  |
| C  | -5.22278200 | -0.70227700 | 3.38579600  |
| C  | -4.79429500 | 1.66967900  | 3.24762900  |
| C  | -5.05852300 | 0.53299500  | 4.00672700  |
| H  | -5.42731200 | -1.58168700 | 3.98840500  |
| H  | -4.66597600 | 2.62643800  | 3.74375700  |
| H  | -5.13770600 | 0.61081400  | 5.08727000  |
| C  | -5.31514200 | -2.20081200 | 1.34628100  |
| C  | -6.75897100 | -2.71011400 | 1.52913600  |
| C  | -4.29335700 | -3.22784600 | 1.87033700  |
| H  | -5.14136500 | -2.09648000 | 0.27137600  |
| H  | -7.48977800 | -2.00376600 | 1.12174900  |
| H  | -6.89225600 | -3.66914800 | 1.01794100  |

|   |             |             |             |
|---|-------------|-------------|-------------|
| H | -6.99811600 | -2.86115300 | 2.58708400  |
| H | -3.26655200 | -2.88287600 | 1.72002400  |
| H | -4.42694000 | -3.42151200 | 2.93965700  |
| H | -4.41388600 | -4.18078900 | 1.34481400  |
| C | -4.42099500 | 2.87261400  | 1.05144800  |
| C | -3.10853900 | 3.55467300  | 1.48280800  |
| C | -5.61255400 | 3.84716900  | 1.14205100  |
| H | -4.30759300 | 2.59474100  | -0.00052400 |
| H | -2.25637200 | 2.87412800  | 1.40035600  |
| H | -2.91185700 | 4.42562400  | 0.84895500  |
| H | -3.15553600 | 3.90657700  | 2.51840700  |
| H | -6.54158500 | 3.38117600  | 0.79733400  |
| H | -5.77277400 | 4.18628800  | 2.17089400  |
| H | -5.42774200 | 4.73258900  | 0.52497900  |
| C | -3.39218000 | -2.74166100 | -3.05826200 |
| C | -2.29178500 | -3.62980500 | -2.44499100 |
| C | -4.27206900 | -3.54326100 | -4.03820600 |
| H | -4.03951300 | -2.41307400 | -2.23917000 |
| H | -1.68920700 | -3.07964400 | -1.71652900 |
| H | -2.73966200 | -4.48993400 | -1.93605800 |
| H | -1.61095800 | -4.01502700 | -3.21021400 |
| H | -5.07587900 | -2.92694500 | -4.45451200 |
| H | -3.68494000 | -3.93434200 | -4.87531800 |
| H | -4.72833000 | -4.39739200 | -3.52706800 |
| C | -2.85778700 | 2.37614100  | -3.47170000 |
| C | -3.62936000 | 3.15781300  | -4.55347600 |
| C | -1.57858300 | 3.12636000  | -3.05160100 |
| H | -3.50312800 | 2.32112200  | -2.58977500 |
| H | -4.56246500 | 2.65333400  | -4.82502500 |
| H | -3.87822500 | 4.16209800  | -4.19471000 |
| H | -3.03475500 | 3.26854700  | -5.46628900 |
| H | -1.03040800 | 2.58462200  | -2.27491100 |
| H | -0.90349400 | 3.26953800  | -3.90184800 |
| H | -1.83165300 | 4.11814200  | -2.66199200 |
| O | 1.35755900  | -0.82624400 | -1.57625600 |
| C | 3.25930300  | 3.99388700  | -2.09246400 |
| C | 3.19623900  | 2.77653000  | -1.53323900 |
| H | 2.60356600  | 4.20333500  | -2.93913900 |
| H | 3.80575000  | 2.49648900  | -0.67820700 |
| C | 4.12759100  | 5.11216700  | -1.69596300 |
| C | 3.94792900  | 6.36395200  | -2.31030200 |
| C | 5.13821300  | 4.99090700  | -0.72315300 |
| C | 4.73617700  | 7.45993900  | -1.96194900 |
| H | 3.17690200  | 6.47409700  | -3.06936000 |

|                                              |            |             |                             |
|----------------------------------------------|------------|-------------|-----------------------------|
| C                                            | 5.92481000 | 6.08481800  | -0.37455500                 |
| H                                            | 5.31667900 | 4.03251700  | -0.24607300                 |
| C                                            | 5.72807700 | 7.32515500  | -0.98998100                 |
| H                                            | 4.57731300 | 8.41696200  | -2.45126200                 |
| H                                            | 6.70117100 | 5.96827400  | 0.37637600                  |
| H                                            | 6.34752700 | 8.17487300  | -0.71764600                 |
| C                                            | 2.31555000 | 1.68833400  | -2.04615100                 |
| H                                            | 2.88689100 | 0.79061900  | -2.29266200                 |
| H                                            | 1.72205200 | 2.00016300  | -2.91072700                 |
| O                                            | 1.37510800 | 1.34838900  | -0.96735400                 |
| H                                            | 1.09006600 | -2.13283700 | -0.72164300                 |
| S                                            | 3.88574300 | -3.59561400 | -1.04346500                 |
| S                                            | 4.48749700 | -0.94677500 | -0.13018000                 |
| O                                            | 5.06063400 | -3.57757100 | -1.91753700                 |
| O                                            | 2.57442200 | -3.95623100 | -1.60434600                 |
| O                                            | 3.71741300 | 0.03851500  | 0.65262000                  |
| O                                            | 4.94543700 | -0.55351700 | -1.46922300                 |
| C                                            | 4.23215400 | -4.94114700 | 0.20292600                  |
| C                                            | 6.04987200 | -1.19494100 | 0.86335400                  |
| F                                            | 4.39080400 | -6.10513500 | -0.43945100                 |
| F                                            | 3.21175300 | -5.07884400 | 1.07109600                  |
| F                                            | 5.34456900 | -4.67600400 | 0.89530300                  |
| F                                            | 5.75299400 | -1.48979800 | 2.13489800                  |
| F                                            | 6.77628300 | -0.06808800 | 0.84453400                  |
| F                                            | 6.77917100 | -2.18893900 | 0.34851500                  |
| N                                            | 3.70689300 | -2.34813100 | -0.01529200                 |
| Zero-point correction=                       |            |             | 1.015981 (Hartree/Particle) |
| Thermal correction to Energy=                |            |             | 1.091854                    |
| Thermal correction to Enthalpy=              |            |             | 1.092798                    |
| Thermal correction to Gibbs Free Energy=     |            |             | 0.885857                    |
| Sum of electronic and zero-point Energies=   |            |             | -4350.124602                |
| Sum of electronic and thermal Energies=      |            |             | -4350.048729                |
| Sum of electronic and thermal Enthalpies=    |            |             | -4350.047785                |
| Sum of electronic and thermal Free Energies= |            |             | -4350.254726                |

#### 1-INT7

|   |             |            |             |
|---|-------------|------------|-------------|
| C | -1.81576100 | 2.27101400 | -0.14512400 |
| O | -2.15750900 | 1.02973900 | -0.03617500 |
| C | -2.80145600 | 3.32703300 | 0.12127900  |
| C | -3.77024200 | 3.14483800 | 1.12462500  |
| C | -2.83324800 | 4.48530900 | -0.67641900 |
| C | -4.74720600 | 4.11571400 | 1.32856200  |
| H | -3.74790300 | 2.25971800 | 1.75163200  |

|    |             |             |             |
|----|-------------|-------------|-------------|
| C  | -3.82634400 | 5.43718200  | -0.48177900 |
| C  | -4.78048600 | 5.25652500  | 0.52466900  |
| H  | -5.48947600 | 3.96974800  | 2.10637000  |
| H  | -3.85834600 | 6.32050500  | -1.11195800 |
| C  | -0.45254800 | 2.50020400  | -0.53774800 |
| C  | 0.28720500  | 3.73662900  | -0.15795700 |
| C  | 0.20121300  | 1.50018900  | -1.20655500 |
| C  | 0.78987000  | 0.55296700  | -1.82303000 |
| C  | 1.06988800  | 0.33401300  | -3.25232900 |
| C  | 1.27372300  | 1.43637600  | -4.10258500 |
| C  | 1.14358700  | -0.95966400 | -3.79328400 |
| C  | 1.53747500  | 1.24627200  | -5.45683200 |
| C  | 1.39612600  | -1.14414600 | -5.15228900 |
| H  | 0.98456700  | -1.81726000 | -3.14722300 |
| C  | 1.59693300  | -0.04459800 | -5.98826800 |
| H  | 1.69425800  | 2.10795200  | -6.09975800 |
| H  | 1.43693700  | -2.15140800 | -5.55680100 |
| H  | 1.79926800  | -0.19112200 | -7.04529700 |
| H  | -5.55201300 | 6.00564700  | 0.67857900  |
| H  | -2.09702200 | 4.61898200  | -1.46050900 |
| H  | 1.23447900  | 2.43814800  | -3.68542300 |
| O  | -0.14666500 | 4.66123000  | 0.50093300  |
| C  | 4.83827000  | 4.52898100  | 0.12485000  |
| C  | 3.78539700  | 4.52182600  | -0.70570600 |
| H  | 4.65216400  | 4.75394200  | 1.17558300  |
| H  | 3.90489500  | 4.30766900  | -1.76571800 |
| C  | 6.24833500  | 4.27586500  | -0.20765900 |
| C  | 7.21810100  | 4.42574000  | 0.79948000  |
| C  | 6.68113500  | 3.88237000  | -1.48828300 |
| C  | 8.56953200  | 4.19861900  | 0.54166700  |
| H  | 6.90324600  | 4.73007700  | 1.79480800  |
| C  | 8.02941000  | 3.65428900  | -1.74628800 |
| H  | 5.95779200  | 3.74730400  | -2.28645100 |
| C  | 8.98133900  | 3.81211100  | -0.73390800 |
| H  | 9.29933900  | 4.32484400  | 1.33637000  |
| H  | 8.34111000  | 3.35021400  | -2.74156400 |
| H  | 10.03270000 | 3.63388100  | -0.93987000 |
| C  | 2.39279200  | 4.82344700  | -0.25611400 |
| H  | 1.98908500  | 5.71975700  | -0.74437200 |
| H  | 2.33535600  | 4.98263400  | 0.82428400  |
| O  | 1.55871800  | 3.69735500  | -0.62560100 |
| H  | -3.17588200 | 0.77995100  | 0.02853900  |
| Au | 1.31632800  | -0.82455500 | -0.31164700 |
| C  | 1.79512800  | -2.27742700 | 1.03476300  |

|   |             |             |             |
|---|-------------|-------------|-------------|
| C | 2.06604600  | -4.31735900 | 1.97547800  |
| C | 2.41554100  | -3.39082600 | 2.90383700  |
| H | 2.76137000  | -3.49396000 | 3.91949500  |
| H | 2.04602300  | -5.39430500 | 2.01507800  |
| N | 1.69079500  | -3.61941700 | 0.83475500  |
| N | 2.24582400  | -2.14514100 | 2.31146100  |
| C | 1.29190500  | -4.24789400 | -0.40825800 |
| C | -0.07623300 | -4.49193800 | -0.63870800 |
| C | 2.30146100  | -4.60000900 | -1.32781300 |
| C | -0.41725100 | -5.11610700 | -1.84636800 |
| C | 1.89957700  | -5.22279200 | -2.51513500 |
| C | 0.55511000  | -5.47899800 | -2.77304800 |
| H | -1.46212500 | -5.31473700 | -2.06152600 |
| H | 2.65000400  | -5.50751100 | -3.24651500 |
| H | 0.26386700  | -5.96190800 | -3.70144600 |
| C | 2.52609900  | -0.89074200 | 2.97864900  |
| C | 3.80519300  | -0.31897600 | 2.82511800  |
| C | 1.51706800  | -0.31295200 | 3.77343500  |
| C | 4.05615700  | 0.87988100  | 3.50304100  |
| C | 1.82747900  | 0.88551400  | 4.42895800  |
| C | 3.08057400  | 1.47604200  | 4.29738900  |
| H | 5.02940800  | 1.35125400  | 3.40568700  |
| H | 1.07263300  | 1.36251300  | 5.04600400  |
| H | 3.29743900  | 2.40593500  | 4.81547700  |
| C | 4.90049500  | -0.94451300 | 1.96701100  |
| C | 6.13379300  | -1.31934500 | 2.81202100  |
| C | 5.28838400  | -0.02646900 | 0.79137100  |
| H | 4.50972500  | -1.87122100 | 1.53668600  |
| H | 5.86962500  | -1.99949400 | 3.62841500  |
| H | 6.88633000  | -1.81334500 | 2.18824200  |
| H | 6.60135700  | -0.43361500 | 3.25477200  |
| H | 4.41820300  | 0.21088700  | 0.17204300  |
| H | 5.71878600  | 0.91782800  | 1.14026700  |
| H | 6.03568900  | -0.51720500 | 0.15852200  |
| C | 0.12787800  | -0.92283400 | 3.93080500  |
| C | -0.95951700 | 0.01359200  | 3.37168700  |
| C | -0.16032400 | -1.30068400 | 5.39708700  |
| H | 0.09101700  | -1.84690900 | 3.34623600  |
| H | -0.78108700 | 0.23977200  | 2.31659000  |
| H | -1.94947800 | -0.44342000 | 3.44836800  |
| H | -0.98893600 | 0.96167900  | 3.92005200  |
| H | 0.59184400  | -1.99212800 | 5.79224500  |
| H | -0.17297600 | -0.41746800 | 6.04461600  |
| H | -1.14052400 | -1.78138300 | 5.47560200  |

|                                              |             |             |                             |
|----------------------------------------------|-------------|-------------|-----------------------------|
| C                                            | 3.78255600  | -4.32445300 | -1.08365800                 |
| C                                            | 4.35743900  | -3.36345700 | -2.14232600                 |
| C                                            | 4.59695000  | -5.63138600 | -1.01698200                 |
| H                                            | 3.88436200  | -3.83008500 | -0.11332900                 |
| H                                            | 3.79248800  | -2.42718500 | -2.17561200                 |
| H                                            | 5.40193000  | -3.12597700 | -1.91308800                 |
| H                                            | 4.33035300  | -3.80688600 | -3.14329200                 |
| H                                            | 4.21696700  | -6.30172100 | -0.23913200                 |
| H                                            | 4.56253700  | -6.17353000 | -1.96778600                 |
| H                                            | 5.64765400  | -5.41562000 | -0.79571200                 |
| C                                            | -1.17318500 | -4.11877000 | 0.35305400                  |
| C                                            | -1.85812000 | -5.37863100 | 0.92040000                  |
| C                                            | -2.20508100 | -3.15952200 | -0.27021800                 |
| H                                            | -0.70945800 | -3.59400900 | 1.19399800                  |
| H                                            | -1.13851300 | -6.04763700 | 1.40526300                  |
| H                                            | -2.61434500 | -5.09406300 | 1.65848500                  |
| H                                            | -2.36302000 | -5.94666900 | 0.13206800                  |
| H                                            | -1.73656600 | -2.23143200 | -0.61055800                 |
| H                                            | -2.71091600 | -3.61002900 | -1.13002500                 |
| H                                            | -2.97698800 | -2.90738200 | 0.46224300                  |
| S                                            | -5.05651700 | -0.38677200 | -1.48740300                 |
| S                                            | -5.07155300 | -0.52800600 | 1.42420500                  |
| O                                            | -6.06086100 | -1.44671500 | -1.47323600                 |
| O                                            | -3.86620600 | -0.47942600 | -2.33321800                 |
| O                                            | -4.24456000 | 0.11229600  | 2.45811500                  |
| O                                            | -5.22635900 | -1.98114300 | 1.41194300                  |
| C                                            | -5.93630900 | 1.15147600  | -2.08102300                 |
| C                                            | -6.78792500 | 0.15758800  | 1.72390100                  |
| F                                            | -6.37487200 | 0.94788900  | -3.32650500                 |
| F                                            | -5.09611800 | 2.19410800  | -2.08003000                 |
| F                                            | -6.97769600 | 1.43261800  | -1.29174400                 |
| F                                            | -6.75869600 | 1.49694600  | 1.67974700                  |
| F                                            | -7.19184500 | -0.22518400 | 2.93924500                  |
| F                                            | -7.65021300 | -0.28952400 | 0.81334700                  |
| N                                            | -4.58106200 | 0.13813300  | 0.00926000                  |
| Zero-point correction=                       |             |             | 1.014501 (Hartree/Particle) |
| Thermal correction to Energy=                |             |             | 1.090347                    |
| Thermal correction to Enthalpy=              |             |             | 1.091291                    |
| Thermal correction to Gibbs Free Energy=     |             |             | 0.884618                    |
| Sum of electronic and zero-point Energies=   |             |             | -4350.144882                |
| Sum of electronic and thermal Energies=      |             |             | -4350.069036                |
| Sum of electronic and thermal Enthalpies=    |             |             | -4350.068092                |
| Sum of electronic and thermal Free Energies= |             |             | -4350.274765                |

## 1-TS5

|   |             |             |             |
|---|-------------|-------------|-------------|
| C | -1.73763700 | 1.95812400  | -0.42006200 |
| O | -2.51639600 | 1.18248500  | 0.34036000  |
| C | -2.35836900 | 3.15349900  | -1.02653700 |
| C | -3.18000200 | 3.98183600  | -0.24661300 |
| C | -2.19004300 | 3.43443400  | -2.39203900 |
| C | -3.79750100 | 5.09214500  | -0.82082800 |
| H | -3.34678100 | 3.75262300  | 0.79957200  |
| C | -2.81812400 | 4.53810400  | -2.96100900 |
| C | -3.61749600 | 5.37334200  | -2.17550400 |
| H | -4.43248300 | 5.72501700  | -0.20875600 |
| H | -2.69793400 | 4.73811500  | -4.02171800 |
| C | -0.44545200 | 1.47663500  | -0.54154500 |
| C | 0.71109600  | 2.15288600  | -1.14501300 |
| C | -0.27800300 | 0.16006100  | 0.05979100  |
| C | -1.26940100 | -0.38903700 | 0.68426900  |
| C | -2.02208900 | -1.31434600 | 1.46594800  |
| C | -1.70078600 | -1.53036700 | 2.82275900  |
| C | -3.10759600 | -2.00432300 | 0.88893300  |
| C | -2.43544700 | -2.44200100 | 3.57433400  |
| C | -3.85349600 | -2.89257600 | 1.65673000  |
| H | -3.36553200 | -1.81293600 | -0.14604600 |
| C | -3.51334600 | -3.11785000 | 2.99353400  |
| H | -2.18319800 | -2.61252500 | 4.61656900  |
| H | -4.70411100 | -3.40032600 | 1.21438600  |
| H | -4.09628400 | -3.81478300 | 3.58912300  |
| H | -4.11180700 | 6.23051600  | -2.62366700 |
| H | -1.59089400 | 2.77018500  | -3.00515900 |
| H | -0.87595300 | -0.98046400 | 3.26386100  |
| O | 1.75276400  | 1.58514000  | -1.45214700 |
| C | 2.97563300  | 5.85704800  | -0.56827800 |
| C | 2.67459300  | 4.58775900  | -0.87920800 |
| H | 2.44627700  | 6.65278900  | -1.09400200 |
| H | 3.18858900  | 3.75183300  | -0.41098700 |
| C | 3.97587000  | 6.31907200  | 0.40643000  |
| C | 4.38599200  | 7.66322000  | 0.38090000  |
| C | 4.53608200  | 5.47435000  | 1.38334000  |
| C | 5.33581100  | 8.14559400  | 1.28069800  |
| H | 3.95517800  | 8.33339800  | -0.35893900 |
| C | 5.48175600  | 5.95645600  | 2.28430400  |
| H | 4.21331400  | 4.43995000  | 1.44865800  |
| C | 5.89029000  | 7.29302100  | 2.23580000  |
| H | 5.63882900  | 9.18791600  | 1.23811700  |

|    |             |             |             |
|----|-------------|-------------|-------------|
| H  | 5.89379500  | 5.29165600  | 3.03896800  |
| H  | 6.62513000  | 7.66644100  | 2.94304700  |
| C  | 1.63891900  | 4.21861600  | -1.89617300 |
| H  | 2.06899600  | 3.60255800  | -2.69167700 |
| H  | 1.17015300  | 5.10520700  | -2.32875300 |
| O  | 0.54278600  | 3.48485500  | -1.29203200 |
| H  | -3.58089400 | 1.18171000  | 0.18740500  |
| Au | 1.41958000  | -1.04786300 | -0.03532500 |
| C  | 3.06296700  | -2.24870800 | -0.18610600 |
| C  | 4.38061100  | -4.05525400 | -0.56642300 |
| C  | 5.19248900  | -3.02661400 | -0.21678800 |
| H  | 6.26304000  | -2.96974200 | -0.10658800 |
| H  | 4.59764800  | -5.07833000 | -0.82712200 |
| N  | 3.08091100  | -3.56447400 | -0.54193700 |
| N  | 4.37310800  | -1.92651600 | 0.00891000  |
| C  | 1.91611800  | -4.36532400 | -0.85336100 |
| C  | 1.36488000  | -5.16846900 | 0.16459000  |
| C  | 1.39999200  | -4.33030600 | -2.16398400 |
| C  | 0.25578500  | -5.95576600 | -0.16705100 |
| C  | 0.28800800  | -5.13685900 | -2.43622300 |
| C  | -0.27905300 | -5.94101400 | -1.45204300 |
| H  | -0.19689600 | -6.58449800 | 0.59363900  |
| H  | -0.13884500 | -5.13263500 | -3.43421400 |
| H  | -1.14219600 | -6.55703200 | -1.68696200 |
| C  | 4.88121100  | -0.62274900 | 0.38251000  |
| C  | 5.36778000  | 0.22262500  | -0.63541400 |
| C  | 4.90511400  | -0.27048900 | 1.74627200  |
| C  | 5.89959000  | 1.45677700  | -0.24334400 |
| C  | 5.44370300  | 0.97924600  | 2.07754700  |
| C  | 5.93924300  | 1.83336400  | 1.09655100  |
| H  | 6.28531300  | 2.13344500  | -0.99882100 |
| H  | 5.47667200  | 1.28322200  | 3.11937800  |
| H  | 6.35507000  | 2.79782300  | 1.37325300  |
| C  | 5.35953600  | -0.16749000 | -2.11087500 |
| C  | 6.77826000  | -0.54053500 | -2.58820300 |
| C  | 4.74871000  | 0.92965900  | -3.00279000 |
| H  | 4.72923100  | -1.05490000 | -2.22206900 |
| H  | 7.20294400  | -1.36354400 | -2.00373600 |
| H  | 6.75955700  | -0.84758400 | -3.63929100 |
| H  | 7.45896800  | 0.31317200  | -2.50048900 |
| H  | 3.75470200  | 1.21482700  | -2.65080600 |
| H  | 5.37831500  | 1.82591700  | -3.02895700 |
| H  | 4.66589100  | 0.56441200  | -4.03229700 |
| C  | 4.38880300  | -1.18594000 | 2.85206800  |



|   |             |             |             |
|---|-------------|-------------|-------------|
| C | 3.23573300  | -0.52941900 | 3.63535600  |
| C | 5.52706300  | -1.62283200 | 3.79525700  |
| H | 3.98606300  | -2.08970300 | 2.38661000  |
| H | 2.41613700  | -0.25060600 | 2.96599900  |
| H | 2.84522000  | -1.22348100 | 4.38753100  |
| H | 3.56748100  | 0.37361000  | 4.15862900  |
| H | 6.32969600  | -2.12749500 | 3.24762000  |
| H | 5.96776200  | -0.76597700 | 4.31556200  |
| H | 5.14817000  | -2.31398700 | 4.55564700  |
| C | 2.00461200  | -3.47738300 | -3.27507400 |
| C | 0.97782400  | -2.48806100 | -3.85930100 |
| C | 2.61887000  | -4.36002100 | -4.37991000 |
| H | 2.81451200  | -2.88148100 | -2.84527300 |
| H | 0.56977600  | -1.83540600 | -3.08192000 |
| H | 1.45319400  | -1.85784600 | -4.61812300 |
| H | 0.14155200  | -3.00849200 | -4.33777200 |
| H | 3.38170400  | -5.03528200 | -3.97826800 |
| H | 1.85618900  | -4.97406200 | -4.87049600 |
| H | 3.08787900  | -3.73627900 | -5.14820200 |
| C | 1.92241400  | -5.20632600 | 1.58443400  |
| C | 2.47117500  | -6.60322200 | 1.93592100  |
| C | 0.87595500  | -4.74384000 | 2.61582900  |
| H | 2.76007600  | -4.50515900 | 1.64125000  |
| H | 3.24553700  | -6.92058300 | 1.22974800  |
| H | 2.90849400  | -6.60017800 | 2.93999100  |
| H | 1.67947100  | -7.35964300 | 1.92086900  |
| H | 0.50922100  | -3.73977100 | 2.38546300  |
| H | 0.01205800  | -5.41614100 | 2.64319000  |
| H | 1.31532500  | -4.72845900 | 3.61931000  |
| S | -6.02560400 | 1.67565300  | 1.19062400  |
| S | -5.49283900 | 0.68387900  | -1.51245100 |
| O | -7.40618200 | 1.87753200  | 0.76281200  |
| O | -5.28481100 | 2.72829300  | 1.88874100  |
| O | -4.25161600 | 0.27924800  | -2.18003200 |
| O | -6.39107800 | 1.66126900  | -2.11491000 |
| C | -6.06640100 | 0.26893400  | 2.42122600  |
| C | -6.49442800 | -0.89606800 | -1.40648100 |
| F | -6.85993600 | 0.60771400  | 3.44133300  |
| F | -4.83558200 | 0.02826200  | 2.88833600  |
| F | -6.54080600 | -0.84756200 | 1.85499900  |
| F | -7.61874400 | -0.71751700 | -0.71594700 |
| F | -5.77598900 | -1.86986000 | -0.82000200 |
| F | -6.79712700 | -1.28445000 | -2.64862600 |
| N | -5.04088300 | 1.01528900  | 0.03868200  |

|                                              |                             |
|----------------------------------------------|-----------------------------|
| Zero-point correction=                       | 1.013669 (Hartree/Particle) |
| Thermal correction to Energy=                | 1.088391                    |
| Thermal correction to Enthalpy=              | 1.089335                    |
| Thermal correction to Gibbs Free Energy=     | 0.887873                    |
| Sum of electronic and zero-point Energies=   | -4350.127344                |
| Sum of electronic and thermal Energies=      | -4350.052622                |
| Sum of electronic and thermal Enthalpies=    | -4350.051678                |
| Sum of electronic and thermal Free Energies= | -4350.253140                |

#### 1-INT8

|   |             |             |             |
|---|-------------|-------------|-------------|
| C | 2.17233200  | 0.15270300  | -0.94101700 |
| O | 1.98916900  | -1.18248600 | -1.21657600 |
| C | 3.52058700  | 0.65724000  | -1.21619900 |
| C | 4.33282100  | -0.02072200 | -2.14889500 |
| C | 4.04168900  | 1.80277100  | -0.58527400 |
| C | 5.61527200  | 0.43677000  | -2.44127400 |
| H | 3.95274300  | -0.90458400 | -2.64779200 |
| C | 5.32078800  | 2.26058100  | -0.89393000 |
| C | 6.11567400  | 1.58299500  | -1.82056700 |
| H | 6.22130300  | -0.10310500 | -3.16328000 |
| H | 5.69980400  | 3.15002000  | -0.39834500 |
| C | 0.94939100  | 0.67594000  | -0.57775700 |
| C | 0.60580400  | 2.08818900  | -0.28193400 |
| C | -0.05370800 | -0.36939500 | -0.63383300 |
| C | 0.64142600  | -1.48941300 | -1.02118900 |
| C | 0.30355000  | -2.88871700 | -1.27882200 |
| C | -0.85281100 | -3.47185900 | -0.72998600 |
| C | 1.14006200  | -3.69264800 | -2.07889000 |
| C | -1.16071400 | -4.80725600 | -0.97556500 |
| C | 0.83135700  | -5.03131600 | -2.31305000 |
| H | 2.03301300  | -3.26778600 | -2.52323900 |
| C | -0.32075100 | -5.59692000 | -1.76460600 |
| H | -2.05776500 | -5.23377300 | -0.53719000 |
| H | 1.49544700  | -5.63086600 | -2.92923000 |
| H | -0.55864900 | -6.64134700 | -1.94551000 |
| H | 7.11367100  | 1.94248900  | -2.05442200 |
| H | 3.44622200  | 2.32220200  | 0.15296600  |
| H | -1.49872700 | -2.87223000 | -0.09802300 |
| O | -0.26086200 | 2.72287000  | -0.85228500 |
| C | 2.67383600  | 5.81500900  | 0.69535300  |
| C | 1.74549500  | 4.96167500  | 0.23643500  |
| H | 2.92474100  | 5.77021300  | 1.75629600  |
| H | 1.44897000  | 4.95267200  | -0.80935000 |

|    |             |             |             |
|----|-------------|-------------|-------------|
| C  | 3.41226400  | 6.83469600  | -0.06429100 |
| C  | 4.34247200  | 7.64205900  | 0.61367100  |
| C  | 3.23857500  | 7.04327300  | -1.44580000 |
| C  | 5.07422700  | 8.62089000  | -0.05732200 |
| H  | 4.49078900  | 7.49527100  | 1.68082000  |
| C  | 3.96913700  | 8.01928400  | -2.11657700 |
| H  | 2.52971400  | 6.43574500  | -1.99974300 |
| C  | 4.89053600  | 8.81371500  | -1.42675700 |
| H  | 5.78733200  | 9.23149500  | 0.48928500  |
| H  | 3.82092600  | 8.16187900  | -3.18329500 |
| H  | 5.45878500  | 9.57447400  | -1.95398000 |
| C  | 1.03567700  | 3.97929600  | 1.11461200  |
| H  | -0.04830000 | 4.11276800  | 1.06310200  |
| H  | 1.36986500  | 4.05914700  | 2.15146600  |
| O  | 1.33352000  | 2.60237300  | 0.74274200  |
| H  | 3.18566000  | -2.33728200 | -0.27127200 |
| Au | -2.04106100 | -0.10902500 | -0.22977000 |
| C  | -4.03594500 | 0.23036500  | 0.15233800  |
| C  | -6.29127800 | -0.00718200 | 0.33076900  |
| C  | -5.99109900 | 1.26958500  | 0.67260200  |
| H  | -6.61621000 | 2.09055600  | 0.98412600  |
| H  | -7.23213800 | -0.53068500 | 0.28040600  |
| N  | -5.08777800 | -0.62951400 | 0.01805600  |
| N  | -4.61149600 | 1.39987400  | 0.55914500  |
| C  | -5.00620000 | -2.01891600 | -0.37372600 |
| C  | -5.04095400 | -2.34041100 | -1.74495700 |
| C  | -4.95159800 | -2.99724100 | 0.63930400  |
| C  | -5.02369300 | -3.69813400 | -2.08688600 |
| C  | -4.94177800 | -4.33909800 | 0.23818400  |
| C  | -4.98045400 | -4.68767700 | -1.10923300 |
| H  | -5.04400900 | -3.98272100 | -3.13436900 |
| H  | -4.90190900 | -5.11935100 | 0.99238600  |
| H  | -4.97297900 | -5.73459400 | -1.39879100 |
| C  | -3.92085300 | 2.63649100  | 0.85570900  |
| C  | -3.47618600 | 2.85913500  | 2.17386800  |
| C  | -3.77865200 | 3.59093200  | -0.17059300 |
| C  | -2.89022600 | 4.10001500  | 2.45317800  |
| C  | -3.19135100 | 4.81561100  | 0.16801800  |
| C  | -2.75808800 | 5.07286500  | 1.46559600  |
| H  | -2.53824300 | 4.30701000  | 3.45934600  |
| H  | -3.06777900 | 5.57469000  | -0.59760800 |
| H  | -2.31047900 | 6.03308600  | 1.70670000  |
| C  | -3.60407700 | 1.81660600  | 3.28011900  |
| C  | -4.48391600 | 2.32211100  | 4.43981900  |

|   |             |             |             |
|---|-------------|-------------|-------------|
| C | -2.21955800 | 1.36412400  | 3.78379100  |
| H | -4.09549000 | 0.93443800  | 2.86054900  |
| H | -5.48009800 | 2.61296100  | 4.09042200  |
| H | -4.60487100 | 1.53855700  | 5.19539400  |
| H | -4.03842400 | 3.19174900  | 4.93445000  |
| H | -1.61451800 | 0.96322300  | 2.96512300  |
| H | -1.66819900 | 2.19385000  | 4.23950900  |
| H | -2.32800900 | 0.58147900  | 4.54244200  |
| C | -4.24711600 | 3.34013400  | -1.60052300 |
| C | -3.13057000 | 3.60837400  | -2.62741800 |
| C | -5.51185500 | 4.16181400  | -1.92123400 |
| H | -4.51063900 | 2.28221100  | -1.68709900 |
| H | -2.22190100 | 3.05663700  | -2.37551300 |
| H | -3.46424300 | 3.30596700  | -3.62610000 |
| H | -2.87656100 | 4.67298000  | -2.67836100 |
| H | -6.33129000 | 3.93008300  | -1.23232100 |
| H | -5.31271900 | 5.23684500  | -1.85140700 |
| H | -5.85675500 | 3.95147200  | -2.93931400 |
| C | -4.90084700 | -2.65157300 | 2.12508400  |
| C | -3.57903500 | -3.11779200 | 2.76584000  |
| C | -6.11764200 | -3.21963000 | 2.88142400  |
| H | -4.93835500 | -1.56314700 | 2.22332400  |
| H | -2.71602700 | -2.66877700 | 2.26577800  |
| H | -3.54774200 | -2.83002800 | 3.82223800  |
| H | -3.46957900 | -4.20626000 | 2.71547400  |
| H | -7.05999600 | -2.86101300 | 2.45425900  |
| H | -6.13512900 | -4.31414300 | 2.85187300  |
| H | -6.08565600 | -2.91809000 | 3.93376300  |
| C | -5.10039100 | -1.28400400 | -2.84369600 |
| C | -6.40148600 | -1.39747700 | -3.66241100 |
| C | -3.85865000 | -1.34774800 | -3.75375300 |
| H | -5.10018200 | -0.29880500 | -2.36921000 |
| H | -7.28697700 | -1.31493600 | -3.02337800 |
| H | -6.44892200 | -0.60086500 | -4.41240100 |
| H | -6.46146500 | -2.35444400 | -4.19162600 |
| H | -2.93918200 | -1.22325700 | -3.17461100 |
| H | -3.79832400 | -2.30374700 | -4.28465400 |
| H | -3.90037700 | -0.55167100 | -4.50486900 |
| S | 3.32198000  | -3.03747600 | 1.95410900  |
| S | 4.88750900  | -3.88271100 | -0.52916400 |
| O | 4.07794700  | -4.10209600 | 2.58799700  |
| O | 1.87318400  | -2.93136800 | 1.99828400  |
| O | 4.66725300  | -3.52521400 | -1.92463900 |
| O | 4.86862600  | -5.24963300 | -0.04556700 |

|                                              |            |             |                             |
|----------------------------------------------|------------|-------------|-----------------------------|
| C                                            | 3.98012000 | -1.41443000 | 2.62179600                  |
| C                                            | 6.54523700 | -3.15842200 | -0.03790300                 |
| F                                            | 3.67666700 | -1.35036600 | 3.91726500                  |
| F                                            | 3.41030800 | -0.40114000 | 1.97376300                  |
| F                                            | 5.30212900 | -1.36075900 | 2.46793300                  |
| F                                            | 6.55697400 | -1.85096600 | -0.27594500                 |
| F                                            | 7.47897000 | -3.76028300 | -0.77378900                 |
| F                                            | 6.77280500 | -3.38554000 | 1.25283700                  |
| N                                            | 3.81632800 | -2.88755800 | 0.33557200                  |
| Zero-point correction=                       |            |             | 1.018378 (Hartree/Particle) |
| Thermal correction to Energy=                |            |             | 1.093282                    |
| Thermal correction to Enthalpy=              |            |             | 1.094226                    |
| Thermal correction to Gibbs Free Energy=     |            |             | 0.891095                    |
| Sum of electronic and zero-point Energies=   |            |             | -4350.169121                |
| Sum of electronic and thermal Energies=      |            |             | -4350.094217                |
| Sum of electronic and thermal Enthalpies=    |            |             | -4350.093273                |
| Sum of electronic and thermal Free Energies= |            |             | -4350.296404                |

#### 1-INT9

|   |             |            |             |
|---|-------------|------------|-------------|
| C | -1.88499800 | 2.15378100 | -1.72744600 |
| O | -0.75486800 | 2.59972200 | -2.33615200 |
| C | -3.09813100 | 2.89822700 | -2.07897200 |
| C | -2.99829000 | 4.26473600 | -2.40278100 |
| C | -4.35924000 | 2.28179900 | -2.15384000 |
| C | -4.12647600 | 4.99246100 | -2.77347700 |
| H | -2.03020300 | 4.75066000 | -2.35210000 |
| C | -5.48451500 | 3.01454400 | -2.52287500 |
| C | -5.37594600 | 4.37205700 | -2.83317100 |
| H | -4.02925000 | 6.04748400 | -3.01406700 |
| H | -6.44934600 | 2.51836300 | -2.57711800 |
| C | -1.55369700 | 1.06116500 | -0.94504100 |
| C | -2.42877000 | 0.29375000 | -0.03819000 |
| C | -0.13203900 | 0.79733000 | -1.09764400 |
| C | 0.30118400  | 1.79001200 | -1.95688000 |
| C | 1.57978300  | 2.15656300 | -2.57210700 |
| C | 2.76914700  | 1.46598900 | -2.27351100 |
| C | 1.64418700  | 3.22462000 | -3.49004100 |
| C | 3.97341500  | 1.83231800 | -2.86933400 |
| C | 2.85184700  | 3.58520100 | -4.08286900 |
| H | 0.73857900  | 3.76501400 | -3.74014900 |
| C | 4.02498700  | 2.89261700 | -3.77710800 |
| H | 4.87487400  | 1.27998500 | -2.62092700 |

|    |              |             |             |
|----|--------------|-------------|-------------|
| H  | 2.87436900   | 4.41113200  | -4.78881800 |
| H  | 4.96631900   | 3.17517700  | -4.24016100 |
| H  | -6.25578900  | 4.93958900  | -3.12261400 |
| H  | -4.45848300  | 1.22779100  | -1.92683100 |
| H  | 2.74737100   | 0.64440100  | -1.56677100 |
| O  | -2.22626300  | -0.85515700 | 0.32025600  |
| C  | -6.66448800  | -0.34734000 | 0.69311000  |
| C  | -5.33987500  | -0.56124600 | 0.68936800  |
| H  | -7.03230600  | 0.55205900  | 1.18891200  |
| H  | -4.90639400  | -1.43342300 | 0.20658200  |
| C  | -7.71296500  | -1.19216700 | 0.10173900  |
| C  | -9.04955800  | -0.76139800 | 0.17145100  |
| C  | -7.44746300  | -2.41866700 | -0.53674300 |
| C  | -10.08344700 | -1.51900900 | -0.37717400 |
| H  | -9.27507000  | 0.18225800  | 0.66224600  |
| C  | -8.47844600  | -3.17544900 | -1.08525800 |
| H  | -6.42701300  | -2.78340100 | -0.60293400 |
| C  | -9.80211000  | -2.73053200 | -1.00915800 |
| H  | -11.10760100 | -1.16286600 | -0.31039000 |
| H  | -8.25049900  | -4.11864900 | -1.57402500 |
| H  | -10.60405800 | -3.32468200 | -1.43755200 |
| C  | -4.36157900  | 0.35847000  | 1.35377200  |
| H  | -3.73491200  | -0.18584900 | 2.06628700  |
| H  | -4.87060700  | 1.17930200  | 1.86314000  |
| O  | -3.48822000  | 1.01400400  | 0.39785300  |
| H  | 0.79733900   | 1.93665400  | 0.76867400  |
| Au | 0.81520900   | -0.88113900 | -0.38334600 |
| C  | 1.66642100   | -2.66360200 | 0.20349300  |
| C  | 2.97287400   | -4.52485800 | 0.26818700  |
| C  | 1.97945900   | -4.69609300 | 1.17354400  |
| H  | 1.75772200   | -5.51075800 | 1.84339800  |
| H  | 3.79409100   | -5.16133600 | -0.01756200 |
| N  | 2.77390200   | -3.27741400 | -0.31300300 |
| N  | 1.18841000   | -3.55459700 | 1.12175900  |
| C  | 3.64227900   | -2.74980500 | -1.34278600 |
| C  | 3.23511200   | -2.84102100 | -2.68977300 |
| C  | 4.89272400   | -2.22129300 | -0.95929700 |
| C  | 4.12368900   | -2.36879500 | -3.66362800 |
| C  | 5.74300200   | -1.77442700 | -1.97851500 |
| C  | 5.36407400   | -1.84327300 | -3.31611700 |
| H  | 3.83950800   | -2.41961200 | -4.70991100 |
| H  | 6.71543400   | -1.36812300 | -1.71842100 |
| H  | 6.03830100   | -1.48789200 | -4.09012700 |
| C  | -0.00451300  | -3.40421900 | 1.92939300  |

|   |             |             |             |
|---|-------------|-------------|-------------|
| C | 0.09656900  | -2.75508200 | 3.17473800  |
| C | -1.20417700 | -3.97484700 | 1.46088200  |
| C | -1.05835300 | -2.69675400 | 3.96436200  |
| C | -2.32539500 | -3.88931500 | 2.29378600  |
| C | -2.25553900 | -3.25994000 | 3.53292600  |
| H | -1.01691600 | -2.20292700 | 4.93036000  |
| H | -3.26676600 | -4.31771400 | 1.96380900  |
| H | -3.13811400 | -3.20605000 | 4.16419400  |
| C | 1.39412300  | -2.13765400 | 3.68458800  |
| C | 1.94880900  | -2.91671400 | 4.89361100  |
| C | 1.21665700  | -0.64488400 | 4.01704400  |
| H | 2.13734300  | -2.20146700 | 2.88527100  |
| H | 2.12595000  | -3.96898400 | 4.64676800  |
| H | 2.89743000  | -2.48165400 | 5.22597300  |
| H | 1.25385200  | -2.88633200 | 5.73977800  |
| H | 0.79417500  | -0.10636800 | 3.16461000  |
| H | 0.54628700  | -0.49586900 | 4.87011300  |
| H | 2.17876900  | -0.18873800 | 4.26974700  |
| C | -1.31304500 | -4.68028000 | 0.11240400  |
| C | -2.43641300 | -4.08614300 | -0.75770100 |
| C | -1.49086400 | -6.20105600 | 0.29269200  |
| H | -0.37624900 | -4.52153200 | -0.42928500 |
| H | -2.31995500 | -3.00427600 | -0.85332500 |
| H | -2.41767300 | -4.53896700 | -1.75533000 |
| H | -3.42436900 | -4.28578700 | -0.32729300 |
| H | -0.66574600 | -6.64003300 | 0.86365600  |
| H | -2.42039500 | -6.43024600 | 0.82512700  |
| H | -1.53145900 | -6.70118500 | -0.68110500 |
| C | 5.35722200  | -2.15877400 | 0.49390100  |
| C | 5.86862800  | -0.76185600 | 0.89020400  |
| C | 6.43239400  | -3.22988600 | 0.77253900  |
| H | 4.49795300  | -2.37705900 | 1.13462900  |
| H | 5.11231000  | 0.00541500  | 0.71372000  |
| H | 6.12155300  | -0.74842700 | 1.95581300  |
| H | 6.77502400  | -0.48863000 | 0.33905900  |
| H | 6.07260700  | -4.23923500 | 0.54774300  |
| H | 7.32681500  | -3.05545400 | 0.16449800  |
| H | 6.73291600  | -3.20551200 | 1.82543300  |
| C | 1.91024500  | -3.46297600 | -3.12235900 |
| C | 2.14774300  | -4.80458300 | -3.84526500 |
| C | 1.07430300  | -2.50345600 | -3.98987300 |
| H | 1.32261700  | -3.67345600 | -2.22535100 |
| H | 2.69776900  | -5.50983600 | -3.21328500 |
| H | 1.19231500  | -5.26625400 | -4.11670700 |

|                                              |             |             |                             |
|----------------------------------------------|-------------|-------------|-----------------------------|
| H                                            | 2.72422100  | -4.66385200 | -4.76597400                 |
| H                                            | 0.88674000  | -1.56154100 | -3.46685400                 |
| H                                            | 1.57186200  | -2.27520900 | -4.93849800                 |
| H                                            | 0.10721300  | -2.95991600 | -4.22668400                 |
| S                                            | -0.22982700 | 3.13091800  | 2.50221500                  |
| S                                            | 2.71841500  | 2.56707200  | 1.91322600                  |
| O                                            | 0.28099000  | 3.64814200  | 3.75787800                  |
| O                                            | -1.30043900 | 2.15260200  | 2.40567000                  |
| O                                            | 3.29725800  | 1.58814900  | 1.00580000                  |
| O                                            | 2.95016700  | 2.55847700  | 3.34519500                  |
| C                                            | -0.76807500 | 4.61148700  | 1.48372100                  |
| C                                            | 3.24614800  | 4.25347400  | 1.28169800                  |
| F                                            | -1.89420700 | 5.08385900  | 2.01015200                  |
| F                                            | -0.97398400 | 4.24309900  | 0.22187300                  |
| F                                            | 0.17683100  | 5.54963500  | 1.52412000                  |
| F                                            | 2.75002600  | 4.45426900  | 0.06522700                  |
| F                                            | 4.57674400  | 4.26624800  | 1.23790300                  |
| F                                            | 2.81397900  | 5.20004500  | 2.11072100                  |
| N                                            | 1.05846300  | 2.56127100  | 1.55275500                  |
| Zero-point correction=                       |             |             | 1.018131 (Hartree/Particle) |
| Thermal correction to Energy=                |             |             | 1.093052                    |
| Thermal correction to Enthalpy=              |             |             | 1.093996                    |
| Thermal correction to Gibbs Free Energy=     |             |             | 0.890865                    |
| Sum of electronic and zero-point Energies=   |             |             | -4350.171784                |
| Sum of electronic and thermal Energies=      |             |             | -4350.096863                |
| Sum of electronic and thermal Enthalpies=    |             |             | -4350.095919                |
| Sum of electronic and thermal Free Energies= |             |             | -4350.299050                |

#### 1-TS6

|   |             |            |             |
|---|-------------|------------|-------------|
| C | -1.37688000 | 2.52020800 | -1.82496400 |
| O | -0.15396900 | 2.69063300 | -2.43190100 |
| C | -2.46575900 | 3.26642700 | -2.46249800 |
| C | -2.18850500 | 4.51305700 | -3.05332900 |
| C | -3.77106700 | 2.75343100 | -2.54566300 |
| C | -3.19340300 | 5.23119100 | -3.69693200 |
| H | -1.18400800 | 4.91777200 | -2.99137700 |
| C | -4.77160600 | 3.47587700 | -3.19108500 |
| C | -4.48922100 | 4.71608100 | -3.76828000 |
| H | -2.96429400 | 6.19617700 | -4.13987300 |
| H | -5.77494400 | 3.06388300 | -3.24936500 |
| C | -1.21440600 | 1.65196100 | -0.77083100 |
| C | -2.18258400 | 1.24588800 | 0.26982700  |
| C | 0.19146700  | 1.24772000 | -0.71278100 |



|    |              |             |             |
|----|--------------|-------------|-------------|
| C  | 0.77394200   | 1.94167300  | -1.77330100 |
| C  | 2.14075600   | 2.07116400  | -2.27357300 |
| C  | 3.21291900   | 1.43189200  | -1.62362000 |
| C  | 2.40898200   | 2.86123600  | -3.40878000 |
| C  | 4.51323400   | 1.58601600  | -2.09675800 |
| C  | 3.71167500   | 3.00532100  | -3.87794600 |
| H  | 1.59065700   | 3.35810700  | -3.91721000 |
| C  | 4.77002600   | 2.37006400  | -3.22419000 |
| H  | 5.32732100   | 1.08607500  | -1.58124300 |
| H  | 3.90089900   | 3.61749700  | -4.75516100 |
| H  | 5.78633100   | 2.48608900  | -3.58999800 |
| H  | -5.27274200  | 5.27588200  | -4.27088600 |
| H  | -3.99906000  | 1.79183900  | -2.10333400 |
| H  | 3.02936800   | 0.82126500  | -0.74690500 |
| O  | -1.99065900  | 0.33474400  | 1.05621900  |
| C  | -6.49757600  | 0.85700200  | 0.96463800  |
| C  | -5.17380000  | 0.67103900  | 1.07973800  |
| H  | -6.88259500  | 1.86928000  | 1.09510200  |
| H  | -4.72575900  | -0.31510000 | 0.98487500  |
| C  | -7.52544300  | -0.16140800 | 0.70116700  |
| C  | -8.88067500  | 0.19187900  | 0.82289700  |
| C  | -7.21886100  | -1.48226200 | 0.32210300  |
| C  | -9.89377900  | -0.73762000 | 0.59074100  |
| H  | -9.13766500  | 1.20893600  | 1.10868300  |
| C  | -8.22956000  | -2.41046100 | 0.08874500  |
| H  | -6.18159600  | -1.77741400 | 0.19762700  |
| C  | -9.57261500  | -2.04477500 | 0.22396600  |
| H  | -10.93331700 | -0.43985300 | 0.69500800  |
| H  | -7.97161900  | -3.42414000 | -0.20598500 |
| H  | -10.35855400 | -2.77134800 | 0.03957200  |
| C  | -4.21975100  | 1.78629500  | 1.37690400  |
| H  | -3.63173200  | 1.57948000  | 2.27517700  |
| H  | -4.74165800  | 2.73855100  | 1.49090600  |
| O  | -3.29352900  | 2.01002700  | 0.28073600  |
| H  | 0.79294300   | 1.65105000  | 0.54115200  |
| Au | 0.64834800   | -0.79003000 | -0.30956600 |
| C  | 0.98145900   | -2.78543800 | -0.08223200 |
| C  | 1.90335800   | -4.85898000 | -0.14218700 |
| C  | 0.66836300   | -4.98066600 | 0.40109800  |
| H  | 0.12976600   | -5.84060600 | 0.76437800  |
| H  | 2.66182900   | -5.59329500 | -0.35632300 |
| N  | 2.08727300   | -3.51031400 | -0.42704500 |
| N  | 0.11446800   | -3.70623300 | 0.42811200  |
| C  | 3.29358500   | -3.00241500 | -1.04738700 |

|   |             |             |             |
|---|-------------|-------------|-------------|
| C | 3.29263600  | -2.78049800 | -2.43955300 |
| C | 4.43922600  | -2.81500500 | -0.24472100 |
| C | 4.48845600  | -2.34330100 | -3.02251900 |
| C | 5.60713900  | -2.38417300 | -0.88619200 |
| C | 5.63390200  | -2.14832500 | -2.25786900 |
| H | 4.52073700  | -2.15851800 | -4.09157800 |
| H | 6.50759400  | -2.23184400 | -0.30055900 |
| H | 6.55216200  | -1.81417700 | -2.73257400 |
| C | -1.23599800 | -3.46554000 | 0.89391300  |
| C | -1.43748900 | -3.07449100 | 2.23160300  |
| C | -2.29669500 | -3.70587400 | -0.00190100 |
| C | -2.76177900 | -2.96533800 | 2.67302900  |
| C | -3.59916100 | -3.57980700 | 0.49547600  |
| C | -3.83171800 | -3.22460100 | 1.82173400  |
| H | -2.95494800 | -2.66721800 | 3.69828500  |
| H | -4.44014000 | -3.76624100 | -0.16598200 |
| H | -4.85063600 | -3.13964600 | 2.18913500  |
| C | -0.28905200 | -2.77568300 | 3.18891700  |
| C | -0.11177500 | -3.90997400 | 4.21807600  |
| C | -0.46874700 | -1.41166300 | 3.88258500  |
| H | 0.63169300  | -2.71450100 | 2.60243000  |
| H | 0.08476500  | -4.87209500 | 3.73221200  |
| H | 0.72772600  | -3.68938700 | 4.88569600  |
| H | -1.00917400 | -4.02559400 | 4.83590100  |
| H | -0.69152400 | -0.62896800 | 3.15338600  |
| H | -1.28476100 | -1.43522000 | 4.61366600  |
| H | 0.44468500  | -1.13420600 | 4.41654700  |
| C | -2.07829900 | -4.06370800 | -1.46926800 |
| C | -2.56926600 | -2.92841800 | -2.38983200 |
| C | -2.73256500 | -5.40760100 | -1.84210000 |
| H | -1.00324300 | -4.17107000 | -1.63873800 |
| H | -2.06402900 | -1.98686600 | -2.15454200 |
| H | -2.36914300 | -3.17399800 | -3.43870500 |
| H | -3.64778400 | -2.76846400 | -2.28478700 |
| H | -2.36495500 | -6.22224100 | -1.20950400 |
| H | -3.82180700 | -5.37051100 | -1.73587200 |
| H | -2.51217300 | -5.66166100 | -2.88440100 |
| C | 4.45926700  | -3.10961000 | 1.25376500  |
| C | 5.17875500  | -2.02181500 | 2.07186200  |
| C | 5.09833300  | -4.48798200 | 1.53003400  |
| H | 3.42332500  | -3.14120100 | 1.60461800  |
| H | 4.75173300  | -1.03500600 | 1.88729600  |
| H | 5.07535900  | -2.23953500 | 3.14005600  |
| H | 6.25183300  | -1.99077600 | 1.85315000  |

|                                              |             |             |                             |
|----------------------------------------------|-------------|-------------|-----------------------------|
| H                                            | 4.57817700  | -5.29855600 | 1.01045700                  |
| H                                            | 6.14403400  | -4.50363900 | 1.20349300                  |
| H                                            | 5.07818000  | -4.70931800 | 2.60237600                  |
| C                                            | 2.07676600  | -3.03513500 | -3.32601800                 |
| C                                            | 2.31488000  | -4.24916600 | -4.24696000                 |
| C                                            | 1.68280900  | -1.78856300 | -4.13972500                 |
| H                                            | 1.22745400  | -3.27536700 | -2.68164500                 |
| H                                            | 2.54678100  | -5.15085200 | -3.67044200                 |
| H                                            | 1.42336200  | -4.45203000 | -4.85022200                 |
| H                                            | 3.14905400  | -4.07037400 | -4.93399700                 |
| H                                            | 1.50139600  | -0.93241400 | -3.48432500                 |
| H                                            | 2.46223700  | -1.50832200 | -4.85601300                 |
| H                                            | 0.76770600  | -1.98524300 | -4.70867500                 |
| S                                            | 0.36406200  | 3.53657000  | 2.20940700                  |
| S                                            | 2.40048800  | 1.44132000  | 2.48354200                  |
| O                                            | 0.81362500  | 3.93387800  | 3.53701400                  |
| O                                            | -1.04879800 | 3.34808800  | 1.89777500                  |
| O                                            | 2.78275900  | 0.29496500  | 1.65368600                  |
| O                                            | 2.07554600  | 1.26888200  | 3.89273600                  |
| C                                            | 0.93602600  | 4.88565700  | 1.04474100                  |
| C                                            | 3.90533400  | 2.56436700  | 2.42420400                  |
| F                                            | 0.32715500  | 6.02232600  | 1.38397400                  |
| F                                            | 0.61710100  | 4.57655000  | -0.21732300                 |
| F                                            | 2.25731700  | 5.04719300  | 1.13504200                  |
| F                                            | 4.16911100  | 2.90816500  | 1.16121700                  |
| F                                            | 4.93905700  | 1.87000900  | 2.91300600                  |
| F                                            | 3.72319300  | 3.66024500  | 3.15396600                  |
| N                                            | 1.23321700  | 2.23798600  | 1.60549400                  |
| Zero-point correction=                       |             |             | 1.013195 (Hartree/Particle) |
| Thermal correction to Energy=                |             |             | 1.087289                    |
| Thermal correction to Enthalpy=              |             |             | 1.088233                    |
| Thermal correction to Gibbs Free Energy=     |             |             | 0.890553                    |
| Sum of electronic and zero-point Energies=   |             |             | -4350.162174                |
| Sum of electronic and thermal Energies=      |             |             | -4350.088080                |
| Sum of electronic and thermal Enthalpies=    |             |             | -4350.087136                |
| Sum of electronic and thermal Free Energies= |             |             | -4350.284815                |

P

|   |            |             |            |
|---|------------|-------------|------------|
| C | 1.40538600 | 0.41695100  | 2.85027300 |
| O | 0.15958300 | 0.18724900  | 3.42107800 |
| C | 2.54514000 | 0.01732900  | 3.67384400 |
| C | 2.34076200 | -0.35688300 | 5.01618500 |
| C | 3.85423700 | -0.01358800 | 3.15775700 |

|   |             |             |             |
|---|-------------|-------------|-------------|
| C | 3.41259200  | -0.74579200 | 5.81510600  |
| H | 1.33965500  | -0.33649400 | 5.43063400  |
| C | 4.92034000  | -0.40158200 | 3.96461200  |
| C | 4.70771200  | -0.77040800 | 5.29464100  |
| H | 3.23420200  | -1.02745600 | 6.84878800  |
| H | 5.92327100  | -0.41527900 | 3.54830000  |
| C | 1.21033200  | 0.92377300  | 1.59033200  |
| C | 2.14994000  | 1.35633700  | 0.52099300  |
| C | -0.22588700 | 0.98448300  | 1.35901600  |
| C | -0.81124200 | 0.56889100  | 2.56185300  |
| C | -2.18444900 | 0.59090900  | 3.05153800  |
| C | -3.21836100 | 1.04048800  | 2.20870000  |
| C | -2.48154900 | 0.21005700  | 4.37233400  |
| C | -4.52185400 | 1.11063800  | 2.68918800  |
| C | -3.79145800 | 0.27717900  | 4.83972600  |
| H | -1.68510900 | -0.12684300 | 5.02660700  |
| C | -4.81399000 | 0.72959800  | 4.00203400  |
| H | -5.30751700 | 1.47193100  | 2.03312200  |
| H | -4.01280800 | -0.01563000 | 5.86184300  |
| H | -5.83331000 | 0.78939800  | 4.37255300  |
| H | 5.54321200  | -1.07217100 | 5.91934900  |
| H | 4.04572000  | 0.28210100  | 2.13464000  |
| H | -3.00783100 | 1.32371600  | 1.18295000  |
| O | 2.00395900  | 1.03483900  | -0.64193700 |
| C | 6.34393500  | 1.97084200  | -0.26373200 |
| C | 5.03505300  | 1.79680100  | -0.50441800 |
| H | 6.64904800  | 2.86432600  | 0.28253600  |
| H | 4.67172800  | 0.94495200  | -1.07369300 |
| C | 7.44919900  | 1.09483800  | -0.68174100 |
| C | 8.76856900  | 1.57279900  | -0.59952600 |
| C | 7.24877200  | -0.21659900 | -1.15256200 |
| C | 9.84833300  | 0.78213000  | -0.99093300 |
| H | 8.94380200  | 2.58048300  | -0.23096700 |
| C | 8.32638100  | -1.00746200 | -1.54105400 |
| H | 6.24273600  | -0.62249600 | -1.19757300 |
| C | 9.63179300  | -0.51175200 | -1.46598400 |
| H | 10.85823200 | 1.17652600  | -0.92305300 |
| H | 8.15081500  | -2.01873000 | -1.89800200 |
| H | 10.47050600 | -1.13195100 | -1.76845900 |
| C | 3.98720900  | 2.75805400  | -0.03797900 |
| H | 3.34017800  | 3.10133200  | -0.84828900 |
| H | 4.42568500  | 3.61855000  | 0.46971400  |
| O | 3.12213500  | 2.15531400  | 0.98012100  |
| H | -0.68242200 | 1.66903700  | 0.63859500  |

|    |             |             |             |
|----|-------------|-------------|-------------|
| Au | -0.65881200 | -0.88734900 | 0.16998000  |
| C  | -0.98530900 | -2.49436800 | -1.00790400 |
| C  | -1.93941400 | -4.27488200 | -2.02183100 |
| C  | -0.69326900 | -4.13201800 | -2.53714000 |
| H  | -0.16105400 | -4.69767400 | -3.28422900 |
| H  | -2.71454300 | -4.99521700 | -2.22359600 |
| N  | -2.10970200 | -3.25936400 | -1.08917700 |
| N  | -0.11802300 | -3.03816700 | -1.90370000 |
| C  | -3.31296900 | -3.09850400 | -0.29684400 |
| C  | -3.33253800 | -3.63564200 | 1.00621200  |
| C  | -4.42493300 | -2.45411900 | -0.87946400 |
| C  | -4.51406300 | -3.48922200 | 1.74328300  |
| C  | -5.57942000 | -2.34575700 | -0.09495500 |
| C  | -5.62452700 | -2.85019900 | 1.20167300  |
| H  | -4.56267400 | -3.88614200 | 2.75249400  |
| H  | -6.45336500 | -1.85308700 | -0.50671300 |
| H  | -6.53124300 | -2.74735900 | 1.79088500  |
| C  | 1.24310000  | -2.61038400 | -2.16500100 |
| C  | 1.46525600  | -1.60498700 | -3.12630800 |
| C  | 2.28606500  | -3.27213900 | -1.48618500 |
| C  | 2.79807300  | -1.29322400 | -3.42225900 |
| C  | 3.59718900  | -2.91469300 | -1.82188800 |
| C  | 3.85162300  | -1.94451700 | -2.78784900 |
| H  | 3.00913300  | -0.52404600 | -4.15711900 |
| H  | 4.42673000  | -3.40568300 | -1.32183000 |
| H  | 4.87623300  | -1.69005700 | -3.04478500 |
| C  | 0.33346200  | -0.87885500 | -3.84620800 |
| C  | 0.12470600  | -1.45531900 | -5.26187200 |
| C  | 0.55683000  | 0.64422500  | -3.89381300 |
| H  | -0.58905900 | -1.04643900 | -3.28267000 |
| H  | -0.10771300 | -2.52595900 | -5.23859800 |
| H  | -0.70174600 | -0.93972600 | -5.76159200 |
| H  | 1.02306400  | -1.32190900 | -5.87481400 |
| H  | 0.81084800  | 1.03668000  | -2.90629100 |
| H  | 1.36310100  | 0.91314100  | -4.58565700 |
| H  | -0.35231400 | 1.14827100  | -4.23100300 |
| C  | 2.04245600  | -4.33026700 | -0.41410400 |
| C  | 2.55555900  | -3.85853600 | 0.96050000  |
| C  | 2.65604500  | -5.68980000 | -0.80157600 |
| H  | 0.96330900  | -4.47995700 | -0.31844400 |
| H  | 2.08246800  | -2.91723300 | 1.25571300  |
| H  | 2.33490000  | -4.60865600 | 1.72780400  |
| H  | 3.63911200  | -3.70104600 | 0.95158100  |
| H  | 2.26691700  | -6.04697900 | -1.76070100 |

|   |             |             |             |
|---|-------------|-------------|-------------|
| H | 3.74598300  | -5.62980600 | -0.88815200 |
| H | 2.42567100  | -6.44295600 | -0.04054100 |
| C | -4.42275700 | -1.93411100 | -2.31551900 |
| C | -5.11114400 | -0.56624500 | -2.46646300 |
| C | -5.07534000 | -2.96391300 | -3.26374400 |
| H | -3.38100700 | -1.80100400 | -2.62387300 |
| H | -4.66519500 | 0.17939200  | -1.80759000 |
| H | -4.99281200 | -0.21158400 | -3.49530000 |
| H | -6.18715800 | -0.62665100 | -2.26881800 |
| H | -4.57643300 | -3.93758300 | -3.23001500 |
| H | -6.12672900 | -3.12227700 | -2.99926900 |
| H | -5.03949400 | -2.60406100 | -4.29723000 |
| C | -2.15485500 | -4.38907400 | 1.61833300  |
| C | -2.50847400 | -5.87242500 | 1.84821600  |
| C | -1.65901500 | -3.72907200 | 2.91867600  |
| H | -1.32292700 | -4.36134800 | 0.90958900  |
| H | -2.81961600 | -6.35824900 | 0.91768300  |
| H | -1.64212800 | -6.41502700 | 2.24156300  |
| H | -3.32571200 | -5.98226200 | 2.56889100  |
| H | -1.36223000 | -2.69049200 | 2.74563600  |
| H | -2.43196500 | -3.73400000 | 3.69423700  |
| H | -0.79201000 | -4.27188900 | 3.31044100  |
| S | -0.33054200 | 4.54542300  | -0.90020700 |
| S | -2.32892200 | 2.61243200  | -1.67554800 |
| O | -0.62929400 | 5.32039700  | -2.10459000 |
| O | 1.06262000  | 4.23457500  | -0.55407300 |
| O | -2.64263700 | 1.25811400  | -1.16738200 |
| O | -2.08145900 | 2.79062700  | -3.10702600 |
| C | -0.92797500 | 5.57953000  | 0.53555400  |
| C | -3.91276800 | 3.54856800  | -1.33500200 |
| F | -0.27581100 | 6.74747400  | 0.54011000  |
| F | -0.69602200 | 4.95210100  | 1.69617900  |
| F | -2.24086300 | 5.81781300  | 0.43008500  |
| F | -4.22694300 | 3.46770000  | -0.03096600 |
| F | -4.91092700 | 2.99916000  | -2.04314900 |
| F | -3.79647500 | 4.83276000  | -1.67220200 |
| N | -1.24189900 | 3.21296000  | -0.65483900 |

|                                            |                             |
|--------------------------------------------|-----------------------------|
| Zero-point correction=                     | 1.018677 (Hartree/Particle) |
| Thermal correction to Energy=              | 1.093392                    |
| Thermal correction to Enthalpy=            | 1.094336                    |
| Thermal correction to Gibbs Free Energy=   | 0.893020                    |
| Sum of electronic and zero-point Energies= | -4350.181069                |
| Sum of electronic and thermal Energies=    | -4350.106354                |

|                                              |              |
|----------------------------------------------|--------------|
| Sum of electronic and thermal Enthalpies=    | -4350.105410 |
| Sum of electronic and thermal Free Energies= | -4350.306726 |

1-TS1-1

|    |             |             |             |
|----|-------------|-------------|-------------|
| C  | -0.11061400 | 2.73353500  | -1.36539500 |
| O  | 0.02164800  | 2.58797700  | -2.56483800 |
| C  | 0.16104600  | 4.01370700  | -0.65901200 |
| C  | 0.56765400  | 5.11332500  | -1.43410400 |
| C  | 0.01870300  | 4.15481800  | 0.72966700  |
| C  | 0.82258100  | 6.33775200  | -0.82579400 |
| H  | 0.67064900  | 4.98389500  | -2.50613900 |
| C  | 0.27865400  | 5.38326600  | 1.33484600  |
| C  | 0.67875900  | 6.47379300  | 0.55906700  |
| H  | 1.13209800  | 7.18741100  | -1.42666800 |
| H  | 0.16876000  | 5.49105400  | 2.40959100  |
| C  | -0.55138900 | 1.52414700  | -0.52621000 |
| C  | -1.80769200 | 1.40057000  | -0.26303100 |
| C  | -3.11323900 | 1.74537500  | -0.28712800 |
| C  | -4.30722900 | 2.03425700  | -0.30790800 |
| C  | -5.66948000 | 2.41342800  | -0.37515900 |
| C  | -6.43022200 | 2.12161600  | -1.52998000 |
| C  | -6.27596300 | 3.09463100  | 0.70414800  |
| C  | -7.76473600 | 2.50492800  | -1.59702100 |
| C  | -7.61206100 | 3.46993200  | 0.62530600  |
| H  | -5.68717500 | 3.32507900  | 1.58590900  |
| C  | -8.35624900 | 3.17654500  | -0.52212700 |
| H  | -8.34558800 | 2.28486200  | -2.48704100 |
| H  | -8.07516900 | 3.99530400  | 1.45440000  |
| H  | -9.39849700 | 3.47514500  | -0.58015500 |
| H  | 0.87845800  | 7.43061100  | 1.03260400  |
| H  | -0.29222200 | 3.30715400  | 1.33108000  |
| H  | -5.95878600 | 1.60645300  | -2.36038400 |
| Au | 1.01446200  | 0.21995300  | -0.14218100 |
| C  | 2.60931600  | -1.01882600 | 0.12660300  |
| C  | 3.91970000  | -2.85574300 | 0.28829400  |
| C  | 4.72265800  | -1.76852200 | 0.41503200  |
| H  | 5.78631800  | -1.68302800 | 0.56787800  |
| H  | 4.14078900  | -3.91067200 | 0.30438700  |
| N  | 2.62616100  | -2.37908000 | 0.11165000  |
| N  | 3.90495800  | -0.65091700 | 0.31364900  |
| C  | 1.47259900  | -3.23501100 | -0.06766300 |
| C  | 0.78377200  | -3.68156000 | 1.07821200  |
| C  | 1.11366500  | -3.61495700 | -1.37661700 |

|   |             |             |             |
|---|-------------|-------------|-------------|
| C | -0.29435000 | -4.55320300 | 0.87884400  |
| C | 0.02129900  | -4.48214000 | -1.51445300 |
| C | -0.67082000 | -4.95307900 | -0.40114500 |
| H | -0.83823100 | -4.93093000 | 1.73915300  |
| H | -0.27914000 | -4.80438900 | -2.50657200 |
| H | -1.50266400 | -5.63907600 | -0.53224300 |
| C | 4.38632500  | 0.71349800  | 0.40408300  |
| C | 4.77122500  | 1.37168700  | -0.78110400 |
| C | 4.47249800  | 1.30877800  | 1.67816300  |
| C | 5.25980700  | 2.67795000  | -0.65497400 |
| C | 4.96421200  | 2.61836600  | 1.74005500  |
| C | 5.35495000  | 3.29605800  | 0.58866700  |
| H | 5.57148000  | 3.21635900  | -1.54424200 |
| H | 5.04364700  | 3.11195700  | 2.70353100  |
| H | 5.73748400  | 4.30984800  | 0.66090400  |
| C | 4.69945600  | 0.71674100  | -2.15726500 |
| C | 6.11222200  | 0.41502800  | -2.69769400 |
| C | 3.89110200  | 1.56032000  | -3.16153800 |
| H | 4.17853400  | -0.23965000 | -2.05183800 |
| H | 6.67702500  | -0.22761500 | -2.01442900 |
| H | 6.05050300  | -0.09169800 | -3.66627600 |
| H | 6.68835500  | 1.33543000  | -2.83899600 |
| H | 2.87712700  | 1.75823100  | -2.80168800 |
| H | 4.37208000  | 2.52324000  | -3.36167600 |
| H | 3.81359500  | 1.03094700  | -4.11683500 |
| C | 4.04674600  | 0.59718000  | 2.95915600  |
| C | 2.81761400  | 1.27866300  | 3.59250100  |
| C | 5.20682000  | 0.49301900  | 3.96822100  |
| H | 3.75133700  | -0.42444800 | 2.70161000  |
| H | 1.97733200  | 1.30750600  | 2.89125700  |
| H | 2.49950300  | 0.73327200  | 4.48737200  |
| H | 3.04253800  | 2.30762700  | 3.89208900  |
| H | 6.07345500  | -0.01420100 | 3.53264500  |
| H | 5.53604300  | 1.47989600  | 4.30867400  |
| H | 4.89149600  | -0.07179800 | 4.85152500  |
| C | 1.85899100  | -3.13372300 | -2.61830300 |
| C | 0.94450500  | -2.29943000 | -3.53654800 |
| C | 2.49495500  | -4.31078600 | -3.38415100 |
| H | 2.67287500  | -2.47851200 | -2.29537400 |
| H | 0.53659500  | -1.43098100 | -3.00921600 |
| H | 1.50827500  | -1.93419200 | -4.40082600 |
| H | 0.10693200  | -2.89392900 | -3.91674000 |
| H | 3.17548100  | -4.88395400 | -2.74658700 |
| H | 1.73530900  | -5.00118000 | -3.76470000 |



|    |             |             |             |
|----|-------------|-------------|-------------|
| H  | 3.06491400  | -3.94013800 | -4.24193200 |
| C  | 1.17530400  | -3.26765500 | 2.49301200  |
| C  | 1.75603000  | -4.45752400 | 3.28299200  |
| C  | -0.00352200 | -2.62020400 | 3.24486600  |
| H  | 1.96028800  | -2.50986900 | 2.41878100  |
| H  | 2.62627900  | -4.88958000 | 2.77866100  |
| H  | 2.06923600  | -4.13549000 | 4.28135400  |
| H  | 1.01534600  | -5.25449800 | 3.40720600  |
| H  | -0.42138700 | -1.78157400 | 2.67967800  |
| H  | -0.80662900 | -3.34139000 | 3.43223000  |
| H  | 0.33190800  | -2.24803600 | 4.21838800  |
| C  | -4.12299500 | -0.81752300 | 1.42230600  |
| C  | -5.29473100 | -1.53773000 | 1.22353800  |
| C  | -5.37241500 | -2.51759600 | 0.23596800  |
| C  | -4.23044700 | -2.74704400 | -0.53611400 |
| C  | -3.06470900 | -2.02665100 | -0.32467100 |
| H  | -6.28172700 | -3.08310700 | 0.07491200  |
| H  | -3.98929700 | -0.05554800 | 2.17563800  |
| H  | -2.14388200 | -2.16306200 | -0.87379400 |
| Cl | -4.25570300 | -3.95007000 | -1.78751800 |
| Cl | -6.66401200 | -1.19090100 | 2.23080900  |
| N  | -3.03200400 | -1.07963800 | 0.65423600  |
| O  | -1.93722800 | -0.38986500 | 0.84631800  |

|                                              |                             |
|----------------------------------------------|-----------------------------|
| Zero-point correction=                       | 0.859545 (Hartree/Particle) |
| Thermal correction to Energy=                | 0.917267                    |
| Thermal correction to Enthalpy=              | 0.918211                    |
| Thermal correction to Gibbs Free Energy=     | 0.754124                    |
| Sum of electronic and zero-point Energies=   | -3266.140921                |
| Sum of electronic and thermal Energies=      | -3266.083199                |
| Sum of electronic and thermal Enthalpies=    | -3266.082255                |
| Sum of electronic and thermal Free Energies= | -3266.246342                |

#### 1-TS1-2

|   |            |             |             |
|---|------------|-------------|-------------|
| C | 1.63836800 | -2.29592400 | 0.50132800  |
| O | 1.79142000 | -2.61427700 | -0.67361100 |
| C | 1.43178700 | -3.26862600 | 1.59698200  |
| C | 1.36458500 | -4.63359100 | 1.26848500  |
| C | 1.31381200 | -2.86509300 | 2.93647700  |
| C | 1.18408300 | -5.58094100 | 2.27006300  |
| H | 1.45634000 | -4.92431900 | 0.22740600  |
| C | 1.13553800 | -3.81848300 | 3.93639200  |
| C | 1.07071900 | -5.17433500 | 3.60450800  |
| H | 1.13516900 | -6.63570600 | 2.01745600  |

|    |             |             |             |
|----|-------------|-------------|-------------|
| H  | 1.05176400  | -3.50678800 | 4.97273900  |
| C  | 1.69164200  | -0.85211600 | 0.84501000  |
| C  | 1.31002500  | 0.35754400  | 0.91321500  |
| C  | 1.71994300  | 1.63399400  | 1.26216200  |
| C  | 2.02162700  | 2.77942800  | 1.55607000  |
| C  | 2.39795500  | 4.10540500  | 1.90890400  |
| C  | 1.66876300  | 5.20617100  | 1.41333400  |
| C  | 3.50159500  | 4.33168800  | 2.75727400  |
| C  | 2.04224200  | 6.50099000  | 1.76052500  |
| C  | 3.86325500  | 5.63094600  | 3.09956500  |
| H  | 4.05929700  | 3.48405600  | 3.14219100  |
| C  | 3.13706300  | 6.71662000  | 2.60225600  |
| H  | 1.47917800  | 7.34569800  | 1.37550200  |
| H  | 4.71229500  | 5.79848300  | 3.75494300  |
| H  | 3.42339800  | 7.72884700  | 2.87093500  |
| H  | 0.93414900  | -5.91604000 | 4.38600200  |
| H  | 1.37334300  | -1.81161400 | 3.19109800  |
| H  | 0.81854400  | 5.03044100  | 0.76186000  |
| Au | -0.69146900 | 0.09925500  | 0.13931300  |
| C  | -2.58689600 | 0.10929100  | -0.57833800 |
| C  | -4.65639200 | -0.51542500 | -1.22195600 |
| C  | -4.52930600 | 0.81028600  | -1.48744000 |
| H  | -5.21706800 | 1.52028400  | -1.91746500 |
| H  | -5.47865800 | -1.19593500 | -1.37304600 |
| N  | -3.45478200 | -0.93179300 | -0.66358200 |
| N  | -3.25238500 | 1.17955500  | -1.08561000 |
| C  | -3.18987800 | -2.29061700 | -0.23241800 |
| C  | -2.68751000 | -3.20858900 | -1.17686200 |
| C  | -3.48306200 | -2.63875400 | 1.10124900  |
| C  | -2.48202600 | -4.52312400 | -0.74030200 |
| C  | -3.24924100 | -3.96639700 | 1.48019600  |
| C  | -2.75757600 | -4.89896500 | 0.57162100  |
| H  | -2.10272500 | -5.26156100 | -1.43915800 |
| H  | -3.46237800 | -4.27359000 | 2.49929700  |
| H  | -2.59101800 | -5.92472500 | 0.88675600  |
| C  | -2.72490000 | 2.52585700  | -1.19118900 |
| C  | -2.96032400 | 3.42219400  | -0.12936800 |
| C  | -2.02653000 | 2.88512100  | -2.36164700 |
| C  | -2.46559000 | 4.72495500  | -0.27158000 |
| C  | -1.55529700 | 4.20103600  | -2.44575600 |
| C  | -1.77289500 | 5.11236500  | -1.41578600 |
| H  | -2.63323400 | 5.44597500  | 0.52236600  |
| H  | -1.01637100 | 4.51663800  | -3.33348800 |
| H  | -1.40796000 | 6.13110300  | -1.50926700 |

|   |             |             |             |
|---|-------------|-------------|-------------|
| C | -3.71744100 | 3.03477600  | 1.13729100  |
| C | -5.00863200 | 3.86152000  | 1.29816500  |
| C | -2.82154300 | 3.15252000  | 2.38586200  |
| H | -4.01384300 | 1.98511100  | 1.05261900  |
| H | -5.66440300 | 3.75651300  | 0.42802300  |
| H | -5.56329400 | 3.53169000  | 2.18241400  |
| H | -4.79068000 | 4.92707100  | 1.42290800  |
| H | -1.92066300 | 2.53848100  | 2.28802200  |
| H | -2.50554000 | 4.18649800  | 2.55808200  |
| H | -3.36638400 | 2.82103800  | 3.27578100  |
| C | -1.77883200 | 1.91804600  | -3.51538800 |
| C | -0.27232500 | 1.71676100  | -3.76996300 |
| C | -2.50479100 | 2.37481100  | -4.79624200 |
| H | -2.19019600 | 0.94250600  | -3.23965200 |
| H | 0.23835900  | 1.36462400  | -2.86780300 |
| H | -0.11799200 | 0.97583300  | -4.56100900 |
| H | 0.21048300  | 2.64623000  | -4.08896900 |
| H | -3.58159900 | 2.48173700  | -4.63116500 |
| H | -2.12599900 | 3.33915800  | -5.15023500 |
| H | -2.35564700 | 1.64495300  | -5.59839300 |
| C | -4.03721200 | -1.64700700 | 2.12000700  |
| C | -3.05034900 | -1.42576100 | 3.28299300  |
| C | -5.42099300 | -2.08433300 | 2.63977400  |
| H | -4.17051700 | -0.68176900 | 1.62236800  |
| H | -2.08301700 | -1.06427400 | 2.91903200  |
| H | -3.44947800 | -0.68615400 | 3.98489600  |
| H | -2.87459600 | -2.35183400 | 3.83982700  |
| H | -6.13443400 | -2.21461600 | 1.82001600  |
| H | -5.36551900 | -3.03161700 | 3.18548500  |
| H | -5.82449300 | -1.33154400 | 3.32455400  |
| C | -2.39909200 | -2.83302300 | -2.62759300 |
| C | -3.48068000 | -3.40550200 | -3.56701500 |
| C | -0.99283300 | -3.27143500 | -3.07823400 |
| H | -2.43588900 | -1.74211400 | -2.70994500 |
| H | -4.48165700 | -3.05570700 | -3.29448300 |
| H | -3.28711300 | -3.10446200 | -4.60170200 |
| H | -3.49164100 | -4.49994500 | -3.53286900 |
| H | -0.21417800 | -2.89445900 | -2.40910000 |
| H | -0.90246200 | -4.36187800 | -3.11826100 |
| H | -0.79202900 | -2.89455100 | -4.08639100 |
| C | 4.73234000  | 0.22451200  | -0.21459400 |
| C | 5.55744400  | 0.34871000  | -1.32332000 |
| C | 6.12739800  | -0.77328200 | -1.92668400 |
| C | 5.83314500  | -2.02021300 | -1.37473900 |

|                                              |            |             |                             |
|----------------------------------------------|------------|-------------|-----------------------------|
| C                                            | 5.00259700 | -2.13255200 | -0.26829100                 |
| H                                            | 6.77447300 | -0.67948700 | -2.78978000                 |
| H                                            | 4.25959900 | 1.04948300  | 0.30070900                  |
| H                                            | 4.73664900 | -3.06366200 | 0.20987100                  |
| Cl                                           | 6.50162000 | -3.46512900 | -2.06254000                 |
| Cl                                           | 5.87514100 | 1.93605900  | -1.94959200                 |
| N                                            | 4.47431600 | -1.01174000 | 0.29234800                  |
| O                                            | 3.70832800 | -1.12971900 | 1.35079400                  |
| Zero-point correction=                       |            |             | 0.859607 (Hartree/Particle) |
| Thermal correction to Energy=                |            |             | 0.917575                    |
| Thermal correction to Enthalpy=              |            |             | 0.918519                    |
| Thermal correction to Gibbs Free Energy=     |            |             | 0.754145                    |
| Sum of electronic and zero-point Energies=   |            |             | -3266.133992                |
| Sum of electronic and thermal Energies=      |            |             | -3266.076023                |
| Sum of electronic and thermal Enthalpies=    |            |             | -3266.075079                |
| Sum of electronic and thermal Free Energies= |            |             | -3266.239453                |

#### 1-TS1-3

|   |             |            |             |
|---|-------------|------------|-------------|
| C | 1.86057500  | 3.00057800 | -1.19226000 |
| O | 2.64479300  | 2.52143300 | -2.00114700 |
| C | 1.77070300  | 4.46720600 | -0.92790700 |
| C | 2.40014000  | 5.32641900 | -1.84532500 |
| C | 1.11334400  | 5.00262600 | 0.19216000  |
| C | 2.36644900  | 6.70204000 | -1.64518700 |
| H | 2.90649700  | 4.89387200 | -2.70120300 |
| C | 1.08966200  | 6.38192900 | 0.38997000  |
| C | 1.71149600  | 7.23151700 | -0.52798800 |
| H | 2.85031900  | 7.36406800 | -2.35652400 |
| H | 0.59333100  | 6.79373400 | 1.26330700  |
| C | 0.87668300  | 2.20813600 | -0.45315800 |
| C | -0.31458200 | 1.91227300 | -0.11486900 |
| C | -1.51833500 | 2.52818300 | 0.18174200  |
| C | -2.57911000 | 3.06868600 | 0.45649100  |
| C | -3.77992500 | 3.76153400 | 0.76332200  |
| C | -3.76017700 | 5.16191500 | 0.93984500  |
| C | -4.99980600 | 3.06490200 | 0.89354400  |
| C | -4.93308000 | 5.84313000 | 1.24692100  |
| C | -6.16756700 | 3.75811900 | 1.19555000  |
| H | -5.01419200 | 1.98991000 | 0.74752500  |
| C | -6.13709000 | 5.14422000 | 1.37531200  |
| H | -4.91196700 | 6.91984700 | 1.38329500  |
| H | -7.10532500 | 3.21960900 | 1.29268700  |

|    |             |             |             |
|----|-------------|-------------|-------------|
| H  | -7.05118300 | 5.67978800  | 1.61296600  |
| H  | 1.68963000  | 8.30595800  | -0.37217700 |
| H  | 0.63787300  | 4.34827000  | 0.91528100  |
| H  | -2.82169600 | 5.69566700  | 0.83126000  |
| Au | -0.56279600 | -0.25409300 | -0.10976500 |
| C  | -1.08427300 | -2.21209100 | -0.11521500 |
| C  | -1.01469700 | -4.46788000 | -0.02112200 |
| C  | -2.29527800 | -4.11028400 | -0.29389100 |
| H  | -3.18171100 | -4.70248800 | -0.45382600 |
| H  | -0.55620700 | -5.43516700 | 0.10629800  |
| N  | -0.28296900 | -3.29204900 | 0.08638700  |
| N  | -2.32265800 | -2.72309700 | -0.34733000 |
| C  | 1.13576500  | -3.26220700 | 0.38108900  |
| C  | 2.04679100  | -3.31119000 | -0.69198900 |
| C  | 1.53762600  | -3.23268900 | 1.73118400  |
| C  | 3.41047700  | -3.33549100 | -0.37211600 |
| C  | 2.91404500  | -3.25497500 | 1.98945300  |
| C  | 3.84106400  | -3.31069000 | 0.95171400  |
| H  | 4.14216700  | -3.38381900 | -1.17266400 |
| H  | 3.26216500  | -3.24135200 | 3.01766000  |
| H  | 4.90328200  | -3.34439100 | 1.17663700  |
| C  | -3.52418400 | -1.95743600 | -0.61315100 |
| C  | -4.35049900 | -1.61048400 | 0.47407200  |
| C  | -3.83582500 | -1.63774100 | -1.94992300 |
| C  | -5.53250400 | -0.91779700 | 0.18195100  |
| C  | -5.02667100 | -0.93736600 | -2.17873100 |
| C  | -5.86817000 | -0.58354100 | -1.12779500 |
| H  | -6.20263500 | -0.64691300 | 0.99227100  |
| H  | -5.30163500 | -0.67382900 | -3.19509300 |
| H  | -6.79240400 | -0.05084300 | -1.33133200 |
| C  | -4.01583600 | -1.96140400 | 1.92074700  |
| C  | -5.05044500 | -2.93547600 | 2.51823800  |
| C  | -3.87448300 | -0.69726200 | 2.79077700  |
| H  | -3.04672700 | -2.46896500 | 1.93381900  |
| H  | -5.12540100 | -3.85409900 | 1.92771100  |
| H  | -4.76835900 | -3.21107600 | 3.53946300  |
| H  | -6.04772100 | -2.48570700 | 2.55971400  |
| H  | -3.12574800 | -0.01242000 | 2.38041300  |
| H  | -4.82146300 | -0.15280000 | 2.86722800  |
| H  | -3.57001900 | -0.96910700 | 3.80677300  |
| C  | -2.95094800 | -2.03239000 | -3.12830700 |
| C  | -2.46218700 | -0.79762400 | -3.90974700 |
| C  | -3.66941700 | -3.03144600 | -4.05701000 |
| H  | -2.06287100 | -2.53593700 | -2.73484800 |

|                                            |             |             |                             |
|--------------------------------------------|-------------|-------------|-----------------------------|
| H                                          | -1.92365800 | -0.10283000 | -3.25764400                 |
| H                                          | -1.78664000 | -1.10299700 | -4.71535300                 |
| H                                          | -3.29499000 | -0.25309000 | -4.36623400                 |
| H                                          | -3.98138900 | -3.93054200 | -3.51598600                 |
| H                                          | -4.56340500 | -2.58849100 | -4.50758000                 |
| H                                          | -3.00539000 | -3.33918600 | -4.87112200                 |
| C                                          | 0.55043400  | -3.17920700 | 2.89331700                  |
| C                                          | 0.68388300  | -1.85925300 | 3.67844600                  |
| C                                          | 0.69869600  | -4.39831900 | 3.82461700                  |
| H                                          | -0.46350300 | -3.20756700 | 2.48360800                  |
| H                                          | 0.52828500  | -0.99414900 | 3.02523200                  |
| H                                          | -0.05876500 | -1.81662000 | 4.48182100                  |
| H                                          | 1.67340100  | -1.76642700 | 4.13898000                  |
| H                                          | 0.57768000  | -5.33836500 | 3.27730100                  |
| H                                          | 1.67987500  | -4.42007600 | 4.30964100                  |
| H                                          | -0.05891100 | -4.36576900 | 4.61400600                  |
| C                                          | 1.61010600  | -3.34029300 | -2.15317600                 |
| C                                          | 2.02517500  | -4.65505800 | -2.84217500                 |
| C                                          | 2.14229000  | -2.11415200 | -2.92083700                 |
| H                                          | 0.51786600  | -3.28808500 | -2.18416400                 |
| H                                          | 1.61642200  | -5.52794300 | -2.32331700                 |
| H                                          | 1.66184800  | -4.67359400 | -3.87459300                 |
| H                                          | 3.11397600  | -4.76633200 | -2.87213400                 |
| H                                          | 1.85463700  | -1.18257100 | -2.42427300                 |
| H                                          | 3.23502500  | -2.13777500 | -2.99746500                 |
| H                                          | 1.74391300  | -2.10294100 | -3.94049900                 |
| C                                          | 4.36018500  | 0.50673700  | -0.88693000                 |
| C                                          | 5.71591500  | 0.56699800  | -0.59633000                 |
| C                                          | 6.17143600  | 0.64113800  | 0.72054000                  |
| C                                          | 5.20838700  | 0.64906200  | 1.72981200                  |
| C                                          | 3.85626100  | 0.58500100  | 1.42769300                  |
| H                                          | 7.22849100  | 0.69212300  | 0.94957200                  |
| H                                          | 3.93961200  | 0.48516000  | -1.87999600                 |
| H                                          | 3.06197400  | 0.57337400  | 2.15952800                  |
| Cl                                         | 5.68512100  | 0.73465300  | 3.39872100                  |
| Cl                                         | 6.84822500  | 0.54781100  | -1.91291300                 |
| N                                          | 3.45503000  | 0.51531100  | 0.12872500                  |
| O                                          | 2.17505400  | 0.43751800  | -0.13734400                 |
| Zero-point correction=                     |             |             | 0.859307 (Hartree/Particle) |
| Thermal correction to Energy=              |             |             | 0.917125                    |
| Thermal correction to Enthalpy=            |             |             | 0.918069                    |
| Thermal correction to Gibbs Free Energy=   |             |             | 0.754518                    |
| Sum of electronic and zero-point Energies= |             |             | -3266.119107                |
| Sum of electronic and thermal Energies=    |             |             | -3266.061289                |

|                                              |              |
|----------------------------------------------|--------------|
| Sum of electronic and thermal Enthalpies=    | -3266.060345 |
| Sum of electronic and thermal Free Energies= | -3266.223896 |

1-INT1-1

|    |             |             |             |
|----|-------------|-------------|-------------|
| C  | -0.34554100 | -3.27874400 | -0.88403200 |
| O  | -0.63993300 | -4.17663000 | -0.08799900 |
| C  | 0.87075500  | -3.37562400 | -1.72414500 |
| C  | 1.79443000  | -4.39694400 | -1.43449100 |
| C  | 1.06013100  | -2.57430900 | -2.86374000 |
| C  | 2.88737000  | -4.60823700 | -2.26600400 |
| H  | 1.62339700  | -5.02032300 | -0.56384400 |
| C  | 2.15300600  | -2.79709800 | -3.69963200 |
| C  | 3.06621200  | -3.81069200 | -3.40195000 |
| H  | 3.59488400  | -5.40023400 | -2.04079500 |
| H  | 2.28561100  | -2.18827300 | -4.58844200 |
| C  | -1.30217200 | -2.13608600 | -1.06289800 |
| C  | -1.10503600 | -0.80299400 | -0.93921600 |
| C  | -2.18882500 | 0.07914700  | -1.15311000 |
| C  | -3.07224100 | 0.89320700  | -1.38199500 |
| C  | -4.11087400 | 1.83209800  | -1.64503500 |
| C  | -5.06700700 | 1.58156900  | -2.65238300 |
| C  | -4.20087400 | 3.02523800  | -0.89801400 |
| C  | -6.08405100 | 2.49898400  | -2.90100700 |
| C  | -5.22833200 | 3.93044900  | -1.14764200 |
| H  | -3.46019300 | 3.22622400  | -0.13102100 |
| C  | -6.17083200 | 3.67226900  | -2.14702400 |
| H  | -6.80868300 | 2.30066300  | -3.68486000 |
| H  | -5.29337000 | 4.84449100  | -0.56491900 |
| H  | -6.96677300 | 4.38470200  | -2.34106100 |
| H  | 3.91224900  | -3.98735300 | -4.05979300 |
| H  | 0.34262200  | -1.79867800 | -3.10415700 |
| H  | -4.98768200 | 0.67793100  | -3.24980100 |
| Au | 0.60776200  | 0.12140600  | -0.23000100 |
| C  | 2.15072500  | 1.19442700  | 0.60085100  |
| C  | 4.12731100  | 1.86909300  | 1.47924400  |
| C  | 3.25755400  | 2.90291400  | 1.59967000  |
| H  | 3.37701200  | 3.89098800  | 2.01377300  |
| H  | 5.16173900  | 1.77044100  | 1.76568300  |
| N  | 3.43606000  | 0.83158100  | 0.86569100  |
| N  | 2.05198700  | 2.47480300  | 1.05973800  |
| C  | 4.05525900  | -0.43977200 | 0.55373900  |
| C  | 3.94239900  | -1.49396100 | 1.48158600  |
| C  | 4.80736800  | -0.53905300 | -0.63398900 |

|   |             |             |             |
|---|-------------|-------------|-------------|
| C | 4.61389600  | -2.68535600 | 1.18042800  |
| C | 5.45851700  | -1.75367500 | -0.87985300 |
| C | 5.36530500  | -2.81482500 | 0.01601200  |
| H | 4.55367400  | -3.51903600 | 1.87319400  |
| H | 6.05103500  | -1.86596300 | -1.78238600 |
| H | 5.88590500  | -3.74519800 | -0.19105500 |
| C | 0.86501300  | 3.30431400  | 1.02838300  |
| C | 0.62479700  | 4.09773400  | -0.11127700 |
| C | 0.03153500  | 3.32217900  | 2.16479500  |
| C | -0.49459900 | 4.93878500  | -0.08191800 |
| C | -1.07398000 | 4.18140900  | 2.13614300  |
| C | -1.33204500 | 4.98615400  | 1.02930700  |
| H | -0.70760300 | 5.57001700  | -0.93885400 |
| H | -1.73490200 | 4.22739000  | 2.99628700  |
| H | -2.18525500 | 5.65857000  | 1.03555000  |
| C | 1.52875900  | 4.08373600  | -1.33978700 |
| C | 2.25712000  | 5.43135900  | -1.51374200 |
| C | 0.74823200  | 3.70387300  | -2.61304300 |
| H | 2.29327400  | 3.31556700  | -1.19157500 |
| H | 2.84818500  | 5.68646900  | -0.62830000 |
| H | 2.93475800  | 5.38998800  | -2.37265900 |
| H | 1.54959600  | 6.24865700  | -1.68787700 |
| H | 0.23793500  | 2.74308400  | -2.49359600 |
| H | -0.00633900 | 4.45649400  | -2.86398100 |
| H | 1.43142600  | 3.62671300  | -3.46513000 |
| C | 0.28366100  | 2.45559100  | 3.39537800  |
| C | -0.85473600 | 1.43752300  | 3.60312500  |
| C | 0.50576800  | 3.30987500  | 4.65861700  |
| H | 1.19913900  | 1.88102500  | 3.22840400  |
| H | -0.97605000 | 0.80055100  | 2.72100500  |
| H | -0.63699100 | 0.79611000  | 4.46364200  |
| H | -1.80996900 | 1.93766300  | 3.79484700  |
| H | 1.33726900  | 4.00975400  | 4.52888100  |
| H | -0.38391300 | 3.89539900  | 4.91182200  |
| H | 0.73409500  | 2.66811600  | 5.51568800  |
| C | 4.94944900  | 0.61319300  | -1.62485900 |
| C | 4.42904300  | 0.23101000  | -3.02306000 |
| C | 6.40492300  | 1.11667900  | -1.69374500 |
| H | 4.33285500  | 1.44501600  | -1.27209900 |
| H | 3.38845200  | -0.10302100 | -2.97967300 |
| H | 4.48792900  | 1.09245200  | -3.69656300 |
| H | 5.02207800  | -0.57553000 | -3.46673300 |
| H | 6.77115200  | 1.42807400  | -0.71026000 |
| H | 7.07955600  | 0.33914300  | -2.06675000 |



|                                              |             |             |                             |
|----------------------------------------------|-------------|-------------|-----------------------------|
| H                                            | 6.48031200  | 1.97443200  | -2.36997300                 |
| C                                            | 3.15185600  | -1.37838500 | 2.78110800                  |
| C                                            | 4.07284100  | -1.49742400 | 4.01145200                  |
| C                                            | 2.00668000  | -2.40760300 | 2.84200600                  |
| H                                            | 2.69241300  | -0.38648400 | 2.81347900                  |
| H                                            | 4.86460100  | -0.74180800 | 3.99409700                  |
| H                                            | 3.49669700  | -1.36358200 | 4.93288300                  |
| H                                            | 4.55270300  | -2.48020500 | 4.06037100                  |
| H                                            | 1.33147900  | -2.30036200 | 1.98726700                  |
| H                                            | 2.38669600  | -3.43449400 | 2.84403400                  |
| H                                            | 1.42403100  | -2.26983100 | 3.75911500                  |
| C                                            | -3.26647700 | -3.26646600 | 0.79733100                  |
| C                                            | -4.24568800 | -3.26954500 | 1.78688500                  |
| C                                            | -5.47080000 | -2.63342300 | 1.57471700                  |
| C                                            | -5.68850200 | -1.98826400 | 0.35494400                  |
| C                                            | -4.69234300 | -1.97683700 | -0.61567200                 |
| H                                            | -6.23896300 | -2.64157800 | 2.33943600                  |
| H                                            | -2.28952700 | -3.75791500 | 0.83328800                  |
| H                                            | -4.75965400 | -1.48228900 | -1.57374100                 |
| Cl                                           | -7.18043600 | -1.17727100 | 0.03470300                  |
| Cl                                           | -3.92953700 | -4.09710900 | 3.27170500                  |
| N                                            | -3.54043500 | -2.61479000 | -0.34655900                 |
| O                                            | -2.61576600 | -2.64795300 | -1.39682300                 |
| Zero-point correction=                       |             |             | 0.862135 (Hartree/Particle) |
| Thermal correction to Energy=                |             |             | 0.919332                    |
| Thermal correction to Enthalpy=              |             |             | 0.920276                    |
| Thermal correction to Gibbs Free Energy=     |             |             | 0.759646                    |
| Sum of electronic and zero-point Energies=   |             |             | -3266.156472                |
| Sum of electronic and thermal Energies=      |             |             | -3266.099276                |
| Sum of electronic and thermal Enthalpies=    |             |             | -3266.098331                |
| Sum of electronic and thermal Free Energies= |             |             | -3266.258962                |

#### 1-TS2-1

|   |             |             |             |
|---|-------------|-------------|-------------|
| C | -1.65080700 | -2.24911200 | 0.04880800  |
| O | -0.72304300 | -2.33494900 | 0.85077200  |
| C | -2.47144500 | -3.45760600 | -0.28020100 |
| C | -2.54021100 | -4.47290800 | 0.68914400  |
| C | -3.09423600 | -3.65585100 | -1.52473800 |
| C | -3.24383600 | -5.64650500 | 0.43466800  |
| H | -2.02985600 | -4.32304400 | 1.63483000  |
| C | -3.78032200 | -4.84171600 | -1.78407200 |
| C | -3.86581700 | -5.83282400 | -0.80335000 |

|    |             |             |             |
|----|-------------|-------------|-------------|
| H  | -3.30095700 | -6.41986700 | 1.19463700  |
| H  | -4.24160900 | -4.99673000 | -2.75488000 |
| C  | -1.98781300 | -0.92707600 | -0.57143700 |
| C  | -1.12085900 | 0.16021000  | -0.64531400 |
| C  | -1.60954900 | 1.37698100  | -1.12160300 |
| C  | -1.98088000 | 2.46894300  | -1.54022700 |
| C  | -2.39805300 | 3.73226400  | -2.02992700 |
| C  | -3.70686100 | 3.91158200  | -2.53065500 |
| C  | -1.50664700 | 4.82844800  | -2.03053800 |
| C  | -4.10818900 | 5.15031200  | -3.01778300 |
| C  | -1.91911800 | 6.06488000  | -2.51501600 |
| H  | -0.50060300 | 4.69033800  | -1.64875900 |
| C  | -3.21698300 | 6.22812600  | -3.00940900 |
| H  | -5.11366100 | 5.27981200  | -3.40606700 |
| H  | -1.22982800 | 6.90350200  | -2.51198000 |
| H  | -3.53349900 | 7.19453100  | -3.38999100 |
| H  | -4.40739700 | -6.75195300 | -1.00664000 |
| H  | -3.01869800 | -2.90047200 | -2.29890600 |
| H  | -4.38941000 | 3.06789900  | -2.53734800 |
| Au | 0.87732300  | 0.06747800  | -0.15978100 |
| C  | 2.88232200  | 0.01241400  | 0.26874300  |
| C  | 5.09844300  | -0.44014000 | 0.17031300  |
| C  | 4.89753500  | 0.37582500  | 1.23614300  |
| H  | 5.58424500  | 0.78632600  | 1.95868100  |
| H  | 5.99658700  | -0.88492700 | -0.22659500 |
| N  | 3.85442500  | -0.65521800 | -0.41012800 |
| N  | 3.53463000  | 0.64410100  | 1.28242300  |
| C  | 3.63458800  | -1.49150300 | -1.57262700 |
| C  | 3.46529000  | -2.87742200 | -1.37856300 |
| C  | 3.62021500  | -0.88714100 | -2.84547000 |
| C  | 3.26395800  | -3.66255100 | -2.52053300 |
| C  | 3.41240900  | -1.72331300 | -3.94929200 |
| C  | 3.23447800  | -3.09468800 | -3.79110000 |
| H  | 3.13152600  | -4.73427100 | -2.41108200 |
| H  | 3.39420400  | -1.29313700 | -4.94580400 |
| H  | 3.07787900  | -3.72442600 | -4.66201900 |
| C  | 2.90544000  | 1.47831200  | 2.28444700  |
| C  | 2.80120000  | 2.86188800  | 2.03907700  |
| C  | 2.44350000  | 0.87338100  | 3.47029900  |
| C  | 2.19470000  | 3.64554500  | 3.02827000  |
| C  | 1.84577000  | 1.70780500  | 4.42339700  |
| C  | 1.71980500  | 3.07699100  | 4.20691300  |
| H  | 2.09759300  | 4.71571900  | 2.87364000  |
| H  | 1.47996900  | 1.27737600  | 5.35047700  |

|   |             |             |             |
|---|-------------|-------------|-------------|
| H | 1.25650000  | 3.70467300  | 4.96263000  |
| C | 3.31755400  | 3.52015600  | 0.76306000  |
| C | 4.42494900  | 4.54851800  | 1.06611400  |
| C | 2.16998300  | 4.15860100  | -0.04386500 |
| H | 3.75945000  | 2.74388200  | 0.13195000  |
| H | 5.25683100  | 4.09205600  | 1.61167200  |
| H | 4.81974200  | 4.96820200  | 0.13505900  |
| H | 4.04789900  | 5.37976200  | 1.67081200  |
| H | 1.40772400  | 3.41401200  | -0.29497000 |
| H | 1.68669800  | 4.96492300  | 0.51840200  |
| H | 2.55588900  | 4.58647800  | -0.97553400 |
| C | 2.58204700  | -0.61971300 | 3.75346300  |
| C | 1.20820500  | -1.30021300 | 3.91035600  |
| C | 3.47433100  | -0.87215900 | 4.98532500  |
| H | 3.07467700  | -1.08679500 | 2.89590000  |
| H | 0.60603900  | -1.19873700 | 3.00282900  |
| H | 1.33966300  | -2.36933400 | 4.10750600  |
| H | 0.64596500  | -0.87620500 | 4.74955300  |
| H | 4.46275600  | -0.41690600 | 4.86613600  |
| H | 3.02774900  | -0.46139100 | 5.89678600  |
| H | 3.61254800  | -1.94717700 | 5.13977000  |
| C | 3.83337800  | 0.60823500  | -3.06049800 |
| C | 2.60963100  | 1.26507600  | -3.72754400 |
| C | 5.12029300  | 0.87975700  | -3.86470000 |
| H | 3.95646000  | 1.08031000  | -2.08152600 |
| H | 1.70512900  | 1.10829300  | -3.13133700 |
| H | 2.76933200  | 2.34355000  | -3.83245800 |
| H | 2.43048600  | 0.85887100  | -4.72850100 |
| H | 5.99829700  | 0.44805800  | -3.37374900 |
| H | 5.06139600  | 0.45531000  | -4.87224200 |
| H | 5.28488800  | 1.95739700  | -3.96781400 |
| C | 3.52633100  | -3.53996200 | -0.00500100 |
| C | 4.79187500  | -4.41254800 | 0.12507100  |
| C | 2.25733100  | -4.35490500 | 0.30773300  |
| H | 3.59416800  | -2.75249300 | 0.75138600  |
| H | 5.70322800  | -3.83186400 | -0.05143900 |
| H | 4.85521200  | -4.84579600 | 1.12863400  |
| H | 4.78169100  | -5.23792100 | -0.59453500 |
| H | 1.36072100  | -3.72966300 | 0.28377400  |
| H | 2.12208600  | -5.17987400 | -0.39964000 |
| H | 2.33553300  | -4.79356900 | 1.30827800  |
| C | -4.00190100 | 0.00365100  | 1.17463600  |
| C | -5.02334200 | 0.34217200  | 2.06317900  |
| C | -6.35702800 | 0.21480600  | 1.66912900  |

|                                              |             |             |                             |
|----------------------------------------------|-------------|-------------|-----------------------------|
| C                                            | -6.63799300 | -0.25276200 | 0.38077600                  |
| C                                            | -5.59321900 | -0.58148500 | -0.48074300                 |
| H                                            | -7.16092400 | 0.47245600  | 2.34890300                  |
| H                                            | -2.93691800 | 0.06512600  | 1.38904200                  |
| H                                            | -5.71396600 | -0.95446300 | -1.49046500                 |
| Cl                                           | -8.27062500 | -0.43765900 | -0.15697000                 |
| Cl                                           | -4.61790900 | 0.92256400  | 3.64075800                  |
| N                                            | -4.34767300 | -0.43359200 | -0.02989600                 |
| O                                            | -3.24186300 | -0.80426000 | -1.09384900                 |
| Zero-point correction=                       |             |             | 0.859872 (Hartree/Particle) |
| Thermal correction to Energy=                |             |             | 0.917170                    |
| Thermal correction to Enthalpy=              |             |             | 0.918114                    |
| Thermal correction to Gibbs Free Energy=     |             |             | 0.755642                    |
| Sum of electronic and zero-point Energies=   |             |             | -3266.154259                |
| Sum of electronic and thermal Energies=      |             |             | -3266.096961                |
| Sum of electronic and thermal Enthalpies=    |             |             | -3266.096017                |
| Sum of electronic and thermal Free Energies= |             |             | -3266.258488                |

#### 1-INT2-1

|   |             |            |             |
|---|-------------|------------|-------------|
| C | 1.78067100  | 3.15571200 | -0.41459800 |
| O | 1.22779800  | 2.82313000 | -1.46256300 |
| C | 3.07450300  | 3.84891000 | -0.34855600 |
| C | 3.70791300  | 4.15753400 | -1.57018300 |
| C | 3.69053600  | 4.20628600 | 0.86705700  |
| C | 4.93295400  | 4.81038500 | -1.57560800 |
| H | 3.21758500  | 3.87658900 | -2.49609000 |
| C | 4.92043500  | 4.86034400 | 0.85071700  |
| C | 5.54059300  | 5.16233300 | -0.36391400 |
| H | 5.41757900  | 5.04929300 | -2.51706800 |
| H | 5.39494300  | 5.13720900 | 1.78679300  |
| C | 0.94382000  | 2.78858000 | 0.82578500  |
| C | -0.29556000 | 2.01256600 | 0.45218500  |
| C | -1.48167200 | 2.65363600 | 0.43047900  |
| C | -2.58501000 | 3.22042800 | 0.39730500  |
| C | -3.83058400 | 3.85276400 | 0.36409600  |
| C | -3.92485800 | 5.25803700 | 0.54673300  |
| C | -5.01074500 | 3.09137600 | 0.15086200  |
| C | -5.16570500 | 5.87615700 | 0.51870400  |
| C | -6.24383700 | 3.72440800 | 0.12124600  |
| H | -4.92724200 | 2.01846700 | 0.01279800  |
| C | -6.32070900 | 5.11171200 | 0.30584100  |
| H | -5.24292000 | 6.94905900 | 0.65984500  |
| H | -7.14857500 | 3.14835300 | -0.04235300 |

|    |             |             |             |
|----|-------------|-------------|-------------|
| H  | -7.28968000 | 5.60149800  | 0.28364400  |
| H  | 6.49832100  | 5.67449400  | -0.36908400 |
| H  | 3.20664900  | 3.97645300  | 1.80775300  |
| H  | -3.01799200 | 5.83067300  | 0.70864900  |
| Au | -0.10131200 | 0.00829900  | 0.20357200  |
| C  | 0.10281700  | -2.00790500 | -0.08068300 |
| C  | 0.99313000  | -4.07226000 | -0.28163300 |
| C  | -0.34594500 | -4.18244600 | -0.49059500 |
| H  | -0.96313600 | -5.03738900 | -0.71523300 |
| H  | 1.77702900  | -4.81235900 | -0.28684300 |
| N  | 1.25111300  | -2.73290100 | -0.03212700 |
| N  | -0.87664700 | -2.90732900 | -0.36415100 |
| C  | 2.56830600  | -2.19025600 | 0.23856200  |
| C  | 3.35385700  | -1.76151000 | -0.85052400 |
| C  | 3.00979500  | -2.13747000 | 1.57569000  |
| C  | 4.62855800  | -1.26041800 | -0.55877500 |
| C  | 4.29181200  | -1.62249000 | 1.80421300  |
| C  | 5.09344300  | -1.18988900 | 0.75159000  |
| H  | 5.26606100  | -0.92460900 | -1.37052400 |
| H  | 4.66736200  | -1.56359800 | 2.82090700  |
| H  | 6.08656300  | -0.79946100 | 0.95306000  |
| C  | -2.28150400 | -2.58700300 | -0.52110000 |
| C  | -3.11272800 | -2.63698100 | 0.61579000  |
| C  | -2.75431200 | -2.25875400 | -1.80759300 |
| C  | -4.46761100 | -2.33516400 | 0.42961400  |
| C  | -4.11830500 | -1.96589600 | -1.93079400 |
| C  | -4.96636700 | -2.00341600 | -0.82727200 |
| H  | -5.14062900 | -2.36761100 | 1.28062000  |
| H  | -4.52073600 | -1.71160700 | -2.90631100 |
| H  | -6.02298100 | -1.78293900 | -0.94922600 |
| C  | -2.60275000 | -3.00432900 | 2.00610400  |
| C  | -3.26733500 | -4.29350800 | 2.52883100  |
| C  | -2.78847200 | -1.84138500 | 3.00026600  |
| H  | -1.52854800 | -3.19990200 | 1.93665200  |
| H  | -3.11226500 | -5.13240100 | 1.84308100  |
| H  | -2.84728300 | -4.56862300 | 3.50149300  |
| H  | -4.34684800 | -4.16585200 | 2.65865700  |
| H  | -2.28383400 | -0.93488400 | 2.65065000  |
| H  | -3.84727700 | -1.60330400 | 3.14621600  |
| H  | -2.37223600 | -2.10768900 | 3.97719300  |
| C  | -1.85755600 | -2.22051100 | -3.04134800 |
| C  | -1.80676100 | -0.80980500 | -3.65991600 |
| C  | -2.29056800 | -3.27078500 | -4.08354100 |
| H  | -0.83860900 | -2.47272600 | -2.73298800 |

|   |             |             |             |
|---|-------------|-------------|-------------|
| H | -1.45810900 | -0.06879000 | -2.93346400 |
| H | -1.12280400 | -0.79533700 | -4.51460700 |
| H | -2.79118800 | -0.49286100 | -4.01969800 |
| H | -2.29574000 | -4.27969500 | -3.65896800 |
| H | -3.29549200 | -3.06678300 | -4.46701400 |
| H | -1.60368500 | -3.26499900 | -4.93584100 |
| C | 2.16493600  | -2.61460100 | 2.75358600  |
| C | 1.85447300  | -1.46332700 | 3.73006300  |
| C | 2.83458500  | -3.79660700 | 3.48227300  |
| H | 1.20735500  | -2.97448500 | 2.36499300  |
| H | 1.33875800  | -0.63991100 | 3.22562800  |
| H | 1.21431400  | -1.81949800 | 4.54377600  |
| H | 2.76757100  | -1.06068200 | 4.18022600  |
| H | 3.02630300  | -4.63186200 | 2.80127500  |
| H | 3.79132300  | -3.50436900 | 3.92675800  |
| H | 2.19098000  | -4.15842700 | 4.29053900  |
| C | 2.88358200  | -1.83905500 | -2.30053000 |
| C | 3.71493900  | -2.86375500 | -3.09859500 |
| C | 2.90051400  | -0.45872500 | -2.98536100 |
| H | 1.84632600  | -2.18736600 | -2.30595700 |
| H | 3.66972000  | -3.85940400 | -2.64575100 |
| H | 3.34205600  | -2.94064400 | -4.12501300 |
| H | 4.76843500  | -2.56999500 | -3.14806600 |
| H | 2.28959700  | 0.27013100  | -2.44403100 |
| H | 3.91683800  | -0.05811900 | -3.05784900 |
| H | 2.50776100  | -0.54027700 | -4.00414800 |
| O | 1.17058700  | 3.02371400  | 1.99229700  |

|                                              |                             |
|----------------------------------------------|-----------------------------|
| Zero-point correction=                       | 0.789994 (Hartree/Particle) |
| Thermal correction to Energy=                | 0.840055                    |
| Thermal correction to Enthalpy=              | 0.840999                    |
| Thermal correction to Gibbs Free Energy=     | 0.696334                    |
| Sum of electronic and zero-point Energies=   | -2098.812636                |
| Sum of electronic and thermal Energies=      | -2098.762575                |
| Sum of electronic and thermal Enthalpies=    | -2098.761631                |
| Sum of electronic and thermal Free Energies= | -2098.906295                |

#### 1-TS1'-1

|   |            |            |             |
|---|------------|------------|-------------|
| C | 3.98712700 | 3.21011300 | 0.28089800  |
| O | 4.72955800 | 2.84866400 | 1.18860500  |
| C | 4.44456700 | 4.06986200 | -0.84378700 |
| C | 5.78557100 | 4.48562200 | -0.86091800 |
| C | 3.57869100 | 4.46917900 | -1.87232500 |
| C | 6.25167000 | 5.29057000 | -1.89507400 |

|    |             |             |             |
|----|-------------|-------------|-------------|
| H  | 6.43662800  | 4.16722100  | -0.05372300 |
| C  | 4.04908300  | 5.27445500  | -2.90792400 |
| C  | 5.38427300  | 5.68536900  | -2.91962100 |
| H  | 7.28813200  | 5.61377300  | -1.90649100 |
| H  | 3.37791900  | 5.58335300  | -3.70359500 |
| C  | 2.59672300  | 2.77889500  | 0.29601500  |
| C  | 1.46492200  | 2.34070900  | 0.40883600  |
| C  | 0.19048400  | 1.75335300  | 0.54147600  |
| C  | -0.89326600 | 2.34940700  | 0.88667000  |
| C  | -1.75939600 | 3.36662400  | 1.35256700  |
| C  | -1.93758400 | 3.56500400  | 2.74344200  |
| C  | -2.39495000 | 4.23800900  | 0.43738400  |
| C  | -2.71790400 | 4.62013200  | 3.19829300  |
| C  | -3.16921700 | 5.29502100  | 0.90685000  |
| H  | -2.24740800 | 4.08883900  | -0.62742500 |
| C  | -3.33087600 | 5.48541600  | 2.28233300  |
| H  | -2.84360600 | 4.78011500  | 4.26435000  |
| H  | -3.64148700 | 5.97412500  | 0.20428400  |
| H  | -3.93285400 | 6.31333000  | 2.64438600  |
| H  | 5.74987900  | 6.31447900  | -3.72594800 |
| H  | 2.54097500  | 4.14901400  | -1.85506000 |
| H  | -1.44782800 | 2.89197800  | 3.43916600  |
| Au | 0.39235800  | -0.34120600 | 0.25284300  |
| C  | 0.84610100  | -2.30971200 | 0.03787500  |
| C  | 2.01370100  | -4.24097200 | 0.12403400  |
| C  | 0.80576400  | -4.51999300 | -0.43029600 |
| H  | 0.38472600  | -5.44325700 | -0.79419600 |
| H  | 2.85910100  | -4.87305300 | 0.34313900  |
| N  | 2.02314800  | -2.88199200 | 0.40507300  |
| N  | 0.09965500  | -3.32328300 | -0.47593300 |
| C  | 3.13512700  | -2.17441300 | 1.01142000  |
| C  | 4.11295000  | -1.60982800 | 0.16805800  |
| C  | 3.18637000  | -2.08421800 | 2.41644800  |
| C  | 5.16321900  | -0.91803500 | 0.78275400  |
| C  | 4.26157200  | -1.38042700 | 2.97238300  |
| C  | 5.23552200  | -0.79733700 | 2.16736500  |
| H  | 5.93180600  | -0.46026500 | 0.16843400  |
| H  | 4.33287500  | -1.28427800 | 4.05122000  |
| H  | 6.05257700  | -0.24379900 | 2.61899700  |
| C  | -1.23873600 | -3.19693700 | -1.01187700 |
| C  | -2.33300300 | -3.39338300 | -0.14586500 |
| C  | -1.38720600 | -2.91701600 | -2.38566400 |
| C  | -3.61513100 | -3.30885800 | -0.70467200 |
| C  | -2.69349000 | -2.83739100 | -2.88595600 |

|   |             |             |             |
|---|-------------|-------------|-------------|
| C | -3.79589100 | -3.03700300 | -2.05825900 |
| H | -4.48154100 | -3.46737000 | -0.06999400 |
| H | -2.84721100 | -2.62965800 | -3.94023900 |
| H | -4.79871800 | -2.98628600 | -2.47226900 |
| C | -2.17303400 | -3.69963200 | 1.33973000  |
| C | -2.63868600 | -5.13226200 | 1.66793500  |
| C | -2.90232700 | -2.66136200 | 2.21417800  |
| H | -1.11003100 | -3.63500300 | 1.58863000  |
| H | -2.08959100 | -5.87815000 | 1.08459000  |
| H | -2.48134400 | -5.34982800 | 2.72915800  |
| H | -3.70477000 | -5.26391400 | 1.45527800  |
| H | -2.57561900 | -1.64410300 | 1.97754300  |
| H | -3.98808800 | -2.71369800 | 2.07760500  |
| H | -2.69821800 | -2.85310200 | 3.27266300  |
| C | -0.20332000 | -2.70672000 | -3.32535200 |
| C | -0.17979700 | -1.27038300 | -3.88429700 |
| C | -0.18964800 | -3.74709100 | -4.46265000 |
| H | 0.71802500  | -2.84248900 | -2.75202900 |
| H | -0.12504000 | -0.53292300 | -3.07635400 |
| H | 0.69274500  | -1.12819800 | -4.52996800 |
| H | -1.07237300 | -1.05731300 | -4.48226400 |
| H | -0.17533400 | -4.76897600 | -4.07100500 |
| H | -1.06764400 | -3.65125300 | -5.10956300 |
| H | 0.69825800  | -3.61155000 | -5.08818600 |
| C | 2.13739100  | -2.70878400 | 3.33210100  |
| C | 1.38509600  | -1.63396200 | 4.14120400  |
| C | 2.76023800  | -3.76937000 | 4.26140500  |
| H | 1.39702200  | -3.22041700 | 2.70935200  |
| H | 0.90860800  | -0.90298000 | 3.47979500  |
| H | 0.60784000  | -2.09721000 | 4.75825200  |
| H | 2.06087500  | -1.09082900 | 4.80949200  |
| H | 3.26696000  | -4.55436500 | 3.69112900  |
| H | 3.49520100  | -3.32575200 | 4.94056700  |
| H | 1.98523900  | -4.24118400 | 4.87432700  |
| C | 4.07019200  | -1.72580900 | -1.35277200 |
| C | 5.26470400  | -2.54233700 | -1.88476100 |
| C | 3.99901000  | -0.34206600 | -2.02659400 |
| H | 3.15936700  | -2.26543200 | -1.63043500 |
| H | 5.29686400  | -3.54261200 | -1.44105700 |
| H | 5.19658700  | -2.65520800 | -2.97174600 |
| H | 6.21626600  | -2.04964000 | -1.66078200 |
| H | 3.13939300  | 0.23076400  | -1.66544300 |
| H | 4.89988000  | 0.24789300  | -1.83020300 |
| H | 3.90844100  | -0.45384800 | -3.11232900 |



|                                              |             |            |                             |
|----------------------------------------------|-------------|------------|-----------------------------|
| C                                            | -4.52530000 | 1.57689500 | 1.00227200                  |
| C                                            | -5.72148100 | 1.84685100 | 0.34937200                  |
| C                                            | -5.89158500 | 1.52614700 | -0.99629400                 |
| C                                            | -4.81725600 | 0.92241400 | -1.65390200                 |
| C                                            | -3.62937600 | 0.65118200 | -0.99056900                 |
| H                                            | -6.82155500 | 1.73274400 | -1.51119600                 |
| H                                            | -4.33109800 | 1.79534300 | 2.04196600                  |
| H                                            | -2.76988600 | 0.16643800 | -1.43150200                 |
| Cl                                           | -4.95440000 | 0.49867500 | -3.33182600                 |
| Cl                                           | -7.00527100 | 2.59589500 | 1.24433800                  |
| N                                            | -3.50344100 | 0.98583900 | 0.32495600                  |
| O                                            | -2.37931300 | 0.74341400 | 0.94633800                  |
| Zero-point correction=                       |             |            | 0.859309 (Hartree/Particle) |
| Thermal correction to Energy=                |             |            | 0.917217                    |
| Thermal correction to Enthalpy=              |             |            | 0.918162                    |
| Thermal correction to Gibbs Free Energy=     |             |            | 0.754277                    |
| Sum of electronic and zero-point Energies=   |             |            | -3266.122745                |
| Sum of electronic and thermal Energies=      |             |            | -3266.064837                |
| Sum of electronic and thermal Enthalpies=    |             |            | -3266.063893                |
| Sum of electronic and thermal Free Energies= |             |            | -3266.227777                |

#### 1-INT1'

|   |             |             |             |
|---|-------------|-------------|-------------|
| C | -2.60798000 | 3.43111200  | -1.60799100 |
| O | -2.48964600 | 3.84674800  | -2.75524200 |
| C | -3.24584900 | 4.23263700  | -0.52405600 |
| C | -3.81168700 | 5.47267000  | -0.85937400 |
| C | -3.28942900 | 3.78578600  | 0.80500800  |
| C | -4.41846200 | 6.25030200  | 0.12209500  |
| H | -3.76215900 | 5.80102400  | -1.89213900 |
| C | -3.89506600 | 4.56853300  | 1.78701100  |
| C | -4.46155600 | 5.79928500  | 1.44579300  |
| H | -4.85728200 | 7.20831100  | -0.13954300 |
| H | -3.92031600 | 4.22482900  | 2.81688500  |
| C | -2.12789400 | 2.09823800  | -1.27584800 |
| C | -1.69062700 | 0.96806000  | -1.10586100 |
| C | -1.12428900 | -0.29804900 | -0.84365600 |
| C | -1.79929600 | -1.43361200 | -1.10558900 |
| C | -1.46662200 | -2.84517600 | -0.85473800 |
| C | -1.65584800 | -3.81399100 | -1.86086500 |
| C | -0.97759300 | -3.25706100 | 0.39684000  |
| C | -1.36008800 | -5.15443100 | -1.61935800 |
| C | -0.68578900 | -4.60080500 | 0.63389100  |
| H | -0.83450300 | -2.51797600 | 1.17872600  |

|    |             |             |             |
|----|-------------|-------------|-------------|
| C  | -0.87759500 | -5.55257800 | -0.36946300 |
| H  | -1.49536500 | -5.88675200 | -2.40968300 |
| H  | -0.31664200 | -4.90529100 | 1.60830800  |
| H  | -0.65218200 | -6.59761400 | -0.18041900 |
| H  | -4.93313200 | 6.40932600  | 2.21070800  |
| H  | -2.83417200 | 2.83486000  | 1.06748400  |
| H  | -2.00724200 | -3.50427100 | -2.84113600 |
| Au | 0.84231600  | -0.15196700 | -0.19107600 |
| C  | 2.79836300  | 0.17599300  | 0.32779300  |
| C  | 4.71385200  | 0.54056200  | 1.47933900  |
| C  | 4.98243000  | 0.74925400  | 0.16541300  |
| H  | 5.89113100  | 1.03485500  | -0.33934700 |
| H  | 5.34065600  | 0.60692700  | 2.35386800  |
| N  | 3.37205500  | 0.18783600  | 1.56230200  |
| N  | 3.79983700  | 0.52301900  | -0.52618100 |
| C  | 2.69654900  | -0.12410000 | 2.80360600  |
| C  | 1.99230700  | 0.90006200  | 3.46780200  |
| C  | 2.80563900  | -1.43376200 | 3.31303000  |
| C  | 1.36173300  | 0.56570600  | 4.67298500  |
| C  | 2.15609700  | -1.70793200 | 4.52299100  |
| C  | 1.43823800  | -0.72246300 | 5.19488400  |
| H  | 0.81200400  | 1.32921100  | 5.21444700  |
| H  | 2.22055700  | -2.70512700 | 4.94749800  |
| H  | 0.94594400  | -0.95651400 | 6.13431400  |
| C  | 3.66628400  | 0.65873400  | -1.96310300 |
| C  | 3.90498200  | -0.47148300 | -2.76997700 |
| C  | 3.33046900  | 1.92157500  | -2.49059800 |
| C  | 3.78701800  | -0.30573800 | -4.15528900 |
| C  | 3.22309200  | 2.02502400  | -3.88304400 |
| C  | 3.44752600  | 0.92622700  | -4.70740400 |
| H  | 3.96599800  | -1.15343100 | -4.80947400 |
| H  | 2.96132000  | 2.98075300  | -4.32613700 |
| H  | 3.36108000  | 1.03151200  | -5.78479700 |
| C  | 4.29125200  | -1.83300900 | -2.20015600 |
| C  | 5.71523500  | -2.23665900 | -2.63133600 |
| C  | 3.26619700  | -2.91857700 | -2.58035000 |
| H  | 4.29035500  | -1.75928600 | -1.10852200 |
| H  | 6.45415000  | -1.48884800 | -2.32603800 |
| H  | 5.99408600  | -3.19371300 | -2.17839800 |
| H  | 5.78731800  | -2.34949200 | -3.71795700 |
| H  | 2.26007500  | -2.64679500 | -2.24639500 |
| H  | 3.23034800  | -3.07663400 | -3.66319500 |
| H  | 3.53574500  | -3.87317200 | -2.11620000 |
| C  | 3.09822700  | 3.15429700  | -1.62155300 |

|                                 |             |             |                             |
|---------------------------------|-------------|-------------|-----------------------------|
| C                               | 1.67159800  | 3.71064500  | -1.79255300                 |
| C                               | 4.15585700  | 4.24091300  | -1.90095100                 |
| H                               | 3.20667900  | 2.85980900  | -0.57318700                 |
| H                               | 0.91771300  | 2.95468600  | -1.55341200                 |
| H                               | 1.51964400  | 4.56882400  | -1.12928400                 |
| H                               | 1.48983400  | 4.04986000  | -2.81717800                 |
| H                               | 5.17184100  | 3.86231200  | -1.74933700                 |
| H                               | 4.08916000  | 4.60964000  | -2.92958300                 |
| H                               | 4.00890800  | 5.09547400  | -1.23246900                 |
| C                               | 3.61277200  | -2.52952300 | 2.62194900                  |
| C                               | 2.74364400  | -3.75185500 | 2.27379200                  |
| C                               | 4.83120900  | -2.94104400 | 3.47263300                  |
| H                               | 3.99376500  | -2.13146900 | 1.67719800                  |
| H                               | 1.91073700  | -3.47139000 | 1.62271200                  |
| H                               | 3.34343900  | -4.50501300 | 1.75222300                  |
| H                               | 2.33241900  | -4.22381100 | 3.17270900                  |
| H                               | 5.47661400  | -2.08453800 | 3.69184900                  |
| H                               | 4.52243400  | -3.37586100 | 4.42895900                  |
| H                               | 5.42989400  | -3.68977100 | 2.94391800                  |
| C                               | 1.92531100  | 2.33494200  | 2.95233700                  |
| C                               | 2.68751100  | 3.29356400  | 3.88960000                  |
| C                               | 0.47380000  | 2.80458000  | 2.73991800                  |
| H                               | 2.41888700  | 2.37195800  | 1.97727900                  |
| H                               | 3.73101000  | 2.98722500  | 4.01373600                  |
| H                               | 2.67873600  | 4.31032600  | 3.48366400                  |
| H                               | 2.23118900  | 3.32787600  | 4.88440900                  |
| H                               | -0.05273800 | 2.15063700  | 2.03781500                  |
| H                               | -0.08736700 | 2.81882100  | 3.68016100                  |
| H                               | 0.46126700  | 3.82079800  | 2.33295000                  |
| C                               | -4.78698300 | -2.68228600 | -1.08469300                 |
| C                               | -5.94875800 | -2.85703800 | -0.33705000                 |
| C                               | -6.46746000 | -1.79793200 | 0.41087700                  |
| C                               | -5.79970300 | -0.56984300 | 0.39140900                  |
| C                               | -4.63971300 | -0.41521400 | -0.36085800                 |
| H                               | -7.37423200 | -1.92414600 | 0.99135600                  |
| H                               | -4.31447900 | -3.44699600 | -1.68463000                 |
| H                               | -4.06134300 | 0.49786900  | -0.45090900                 |
| Cl                              | -6.40408900 | 0.77889600  | 1.28380800                  |
| Cl                              | -6.73197800 | -4.39573800 | -0.35626300                 |
| N                               | -4.18725400 | -1.47732200 | -1.05654400                 |
| O                               | -3.06504200 | -1.29050200 | -1.85298500                 |
| Zero-point correction=          |             |             | 0.861742 (Hartree/Particle) |
| Thermal correction to Energy=   |             |             | 0.919239                    |
| Thermal correction to Enthalpy= |             |             | 0.920183                    |

|                                              |              |
|----------------------------------------------|--------------|
| Thermal correction to Gibbs Free Energy=     | 0.755804     |
| Sum of electronic and zero-point Energies=   | -3266.148617 |
| Sum of electronic and thermal Energies=      | -3266.091120 |
| Sum of electronic and thermal Enthalpies=    | -3266.090176 |
| Sum of electronic and thermal Free Energies= | -3266.254555 |

1-TS2'

|    |             |             |             |
|----|-------------|-------------|-------------|
| C  | -2.87416900 | 3.42990800  | -0.77435000 |
| O  | -2.94336000 | 3.95866400  | -1.87914300 |
| C  | -3.37559300 | 4.07685200  | 0.46836700  |
| C  | -4.00686000 | 5.32603000  | 0.36042300  |
| C  | -3.23181200 | 3.47529800  | 1.72725900  |
| C  | -4.49008000 | 5.96203800  | 1.49958700  |
| H  | -4.10488200 | 5.77347500  | -0.62302500 |
| C  | -3.71491900 | 4.11597200  | 2.86687400  |
| C  | -4.34476000 | 5.35801300  | 2.75331200  |
| H  | -4.97927800 | 6.92763700  | 1.41560600  |
| H  | -3.59974300 | 3.65173600  | 3.84173300  |
| C  | -2.28099300 | 2.10696900  | -0.67229400 |
| C  | -1.77723900 | 0.99129600  | -0.72397500 |
| C  | -1.12576200 | -0.25046700 | -0.72181300 |
| C  | -1.81883500 | -1.37210900 | -1.14781500 |
| C  | -1.42641600 | -2.79417700 | -1.04681500 |
| C  | -1.93629000 | -3.72498600 | -1.97144900 |
| C  | -0.58360100 | -3.25765100 | -0.02087300 |
| C  | -1.60217000 | -5.07418800 | -1.87959100 |
| C  | -0.25049200 | -4.60823000 | 0.06677600  |
| H  | -0.19468500 | -2.55931500 | 0.71315100  |
| C  | -0.75849300 | -5.52120100 | -0.86019700 |
| H  | -1.99518100 | -5.77636200 | -2.60871100 |
| H  | 0.40397800  | -4.94371400 | 0.86489400  |
| H  | -0.50116600 | -6.57360700 | -0.78799500 |
| H  | -4.72131200 | 5.85697200  | 3.64146700  |
| H  | -2.73674400 | 2.51162900  | 1.80925300  |
| H  | -2.57858700 | -3.38069400 | -2.77515000 |
| Au | 0.87494500  | -0.09106800 | -0.25206600 |
| C  | 2.86224900  | 0.22429000  | 0.14718100  |
| C  | 4.98314000  | 0.06179800  | 0.92054400  |
| C  | 4.89974900  | 1.20719500  | 0.19632000  |
| H  | 5.63602800  | 1.96126900  | -0.03047500 |
| H  | 5.80571800  | -0.38529200 | 1.45494100  |
| N  | 3.72671300  | -0.52991000 | 0.87925300  |
| N  | 3.59519900  | 1.29268600  | -0.26968000 |

|   |            |             |             |
|---|------------|-------------|-------------|
| C | 3.40870200 | -1.78266900 | 1.53120100  |
| C | 2.87945500 | -1.74799200 | 2.83727200  |
| C | 3.68056100 | -2.98331900 | 0.84550600  |
| C | 2.60737500 | -2.97681200 | 3.45153700  |
| C | 3.39770100 | -4.18126300 | 1.51460800  |
| C | 2.86552200 | -4.18089600 | 2.80133600  |
| H | 2.20148000 | -2.98944300 | 4.45833800  |
| H | 3.60341400 | -5.12606400 | 1.02120900  |
| H | 2.66124200 | -5.12201200 | 3.30385400  |
| C | 3.10237900 | 2.37810500  | -1.09547200 |
| C | 3.20465200 | 2.25618100  | -2.49562900 |
| C | 2.56743600 | 3.51691700  | -0.46090800 |
| C | 2.73737000 | 3.32743000  | -3.26683600 |
| C | 2.11801700 | 4.55616400  | -1.28457200 |
| C | 2.19913300 | 4.46428700  | -2.67110200 |
| H | 2.79769800 | 3.26910200  | -4.34907500 |
| H | 1.69850500 | 5.44979300  | -0.83338400 |
| H | 1.84212200 | 5.28231900  | -3.28946300 |
| C | 3.79757400 | 1.03122000  | -3.18538700 |
| C | 5.07160100 | 1.39316400  | -3.97437200 |
| C | 2.76209700 | 0.33520100  | -4.08956500 |
| H | 4.08784600 | 0.31041600  | -2.41509000 |
| H | 5.82461400 | 1.85764000  | -3.32968400 |
| H | 5.51230400 | 0.49478300  | -4.41866600 |
| H | 4.85452200 | 2.09285300  | -4.78802900 |
| H | 1.87102000 | 0.04781600  | -3.52257800 |
| H | 2.44205700 | 0.98593100  | -4.90979600 |
| H | 3.19270300 | -0.56878500 | -4.53298100 |
| C | 2.46749500 | 3.65587900  | 1.05513800  |
| C | 1.00723200 | 3.83968300  | 1.51093000  |
| C | 3.36097500 | 4.79965100  | 1.57456900  |
| H | 2.83080200 | 2.72859700  | 1.50823400  |
| H | 0.37585300 | 3.02034900  | 1.15373100  |
| H | 0.95202400 | 3.86696500  | 2.60442500  |
| H | 0.58231900 | 4.77655800  | 1.13656300  |
| H | 4.40748300 | 4.65362700  | 1.28847700  |
| H | 3.04119600 | 5.76854900  | 1.17778100  |
| H | 3.31290800 | 4.85575100  | 2.66698500  |
| C | 4.26933500 | -3.02306300 | -0.56200400 |
| C | 3.33258000 | -3.74356600 | -1.55068000 |
| C | 5.67393200 | -3.65866800 | -0.56307700 |
| H | 4.37788200 | -1.99399900 | -0.91656200 |
| H | 2.33992800 | -3.28418400 | -1.56696100 |
| H | 3.74839000 | -3.69997700 | -2.56259800 |

|                                              |             |             |                             |
|----------------------------------------------|-------------|-------------|-----------------------------|
| H                                            | 3.20808300  | -4.80008000 | -1.29153300                 |
| H                                            | 6.35841200  | -3.12438700 | 0.10351500                  |
| H                                            | 5.64097500  | -4.70316900 | -0.23653600                 |
| H                                            | 6.09920400  | -3.63936400 | -1.57161800                 |
| C                                            | 2.61625400  | -0.44974100 | 3.59462800                  |
| C                                            | 3.47287000  | -0.36140800 | 4.87314500                  |
| C                                            | 1.11894600  | -0.27535400 | 3.91524900                  |
| H                                            | 2.90620400  | 0.38597600  | 2.95150600                  |
| H                                            | 4.53990700  | -0.45227700 | 4.64725800                  |
| H                                            | 3.31297700  | 0.59987600  | 5.37212700                  |
| H                                            | 3.21568200  | -1.15158400 | 5.58600100                  |
| H                                            | 0.51713100  | -0.28304400 | 3.00035800                  |
| H                                            | 0.75276500  | -1.07296100 | 4.57035900                  |
| H                                            | 0.94960900  | 0.67787800  | 4.42683000                  |
| C                                            | -4.25995200 | -1.54972900 | 0.34824500                  |
| C                                            | -5.45294900 | -1.77424400 | 1.03626300                  |
| C                                            | -6.65543000 | -1.85354800 | 0.33035300                  |
| C                                            | -6.63322500 | -1.70439700 | -1.06043600                 |
| C                                            | -5.42022500 | -1.48805100 | -1.71423800                 |
| H                                            | -7.59057600 | -2.02543400 | 0.85071900                  |
| H                                            | -3.28041400 | -1.46211700 | 0.81183600                  |
| H                                            | -5.30772900 | -1.36033000 | -2.78450300                 |
| Cl                                           | -8.09225500 | -1.78787200 | -1.98277100                 |
| Cl                                           | -5.42247500 | -1.94365200 | 2.75791300                  |
| N                                            | -4.31757200 | -1.42881600 | -0.97103300                 |
| O                                            | -2.97910700 | -1.12712100 | -1.81707300                 |
| Zero-point correction=                       |             |             | 0.859578 (Hartree/Particle) |
| Thermal correction to Energy=                |             |             | 0.917119                    |
| Thermal correction to Enthalpy=              |             |             | 0.918063                    |
| Thermal correction to Gibbs Free Energy=     |             |             | 0.753447                    |
| Sum of electronic and zero-point Energies=   |             |             | -3266.148204                |
| Sum of electronic and thermal Energies=      |             |             | -3266.090663                |
| Sum of electronic and thermal Enthalpies=    |             |             | -3266.089719                |
| Sum of electronic and thermal Free Energies= |             |             | -3266.254335                |

1-INT2'

|   |             |             |             |
|---|-------------|-------------|-------------|
| C | -4.95503500 | 0.24222500  | 1.35437400  |
| O | -4.98012800 | -0.15784900 | 2.51476500  |
| C | -6.07290100 | 0.23114700  | 0.40415500  |
| C | -7.30723000 | -0.29443300 | 0.82149700  |
| C | -5.92108400 | 0.73580200  | -0.89668200 |
| C | -8.37965100 | -0.31319800 | -0.06286100 |
| H | -7.40090800 | -0.67654700 | 1.83265500  |

|    |             |             |             |
|----|-------------|-------------|-------------|
| C  | -6.99827000 | 0.71419000  | -1.77782000 |
| C  | -8.22544400 | 0.19013200  | -1.35996100 |
| H  | -9.33641400 | -0.71651700 | 0.25285400  |
| H  | -6.88708600 | 1.10444400  | -2.78429900 |
| C  | -3.64951000 | 0.75923600  | 0.97233800  |
| C  | -2.46988000 | 1.12172800  | 0.87176000  |
| C  | -1.17107200 | 1.49225700  | 0.73215600  |
| C  | -0.75956400 | 2.84541000  | 1.25226700  |
| C  | -0.79197600 | 4.06256100  | 0.43779800  |
| C  | -0.37633700 | 5.27339200  | 1.01871800  |
| C  | -1.23701200 | 4.03266800  | -0.89386800 |
| C  | -0.41085400 | 6.44352200  | 0.26906400  |
| C  | -1.26765400 | 5.20780100  | -1.63969400 |
| H  | -1.55597300 | 3.09584100  | -1.34342100 |
| C  | -0.85572000 | 6.41054700  | -1.05765500 |
| H  | -0.09461900 | 7.38203600  | 0.71288400  |
| H  | -1.61124200 | 5.19056500  | -2.66895000 |
| H  | -0.88206200 | 7.32672500  | -1.63992900 |
| H  | -9.06594100 | 0.17487400  | -2.04728100 |
| H  | -4.96516000 | 1.14643600  | -1.21355200 |
| H  | -0.03885600 | 5.27306500  | 2.05001700  |
| Au | 0.26997500  | 0.17436100  | 0.20973700  |
| C  | 1.75761700  | -1.17120000 | -0.18347400 |
| C  | 3.79266900  | -2.09421000 | -0.48460500 |
| C  | 2.87651600  | -3.10014400 | -0.51854000 |
| H  | 2.99247300  | -4.16310300 | -0.65679500 |
| H  | 4.86577200  | -2.10562100 | -0.58786400 |
| N  | 3.08989000  | -0.91863200 | -0.27801800 |
| N  | 1.63397700  | -2.51670500 | -0.33243500 |
| C  | 3.70065300  | 0.39430700  | -0.18781700 |
| C  | 3.88199600  | 1.12833300  | -1.37739500 |
| C  | 4.10402300  | 0.86377000  | 1.07823000  |
| C  | 4.48693600  | 2.38599300  | -1.26468800 |
| C  | 4.70539100  | 2.12799900  | 1.12584300  |
| C  | 4.89477900  | 2.88134500  | -0.02909300 |
| H  | 4.64337900  | 2.98322300  | -2.15750500 |
| H  | 5.03111400  | 2.52495800  | 2.08199800  |
| H  | 5.36577000  | 3.85782900  | 0.03339600  |
| C  | 0.38161800  | -3.24845400 | -0.30392100 |
| C  | -0.08891300 | -3.72799900 | 0.93495200  |
| C  | -0.29513500 | -3.46199600 | -1.52153300 |
| C  | -1.29405600 | -4.44173300 | 0.92522600  |
| C  | -1.49524700 | -4.18122600 | -1.46644400 |
| C  | -1.99056400 | -4.66578500 | -0.25890000 |

|   |             |             |             |
|---|-------------|-------------|-------------|
| H | -1.68898200 | -4.82966600 | 1.85873600  |
| H | -2.04543000 | -4.36848000 | -2.38330500 |
| H | -2.92097100 | -5.22549000 | -0.24128800 |
| C | 0.65487200  | -3.51673600 | 2.25047100  |
| C | 1.15780900  | -4.85594600 | 2.82597300  |
| C | -0.20691800 | -2.76006400 | 3.27980200  |
| H | 1.53471700  | -2.89698700 | 2.05194600  |
| H | 1.80424200  | -5.38191000 | 2.11619600  |
| H | 1.72979500  | -4.68478300 | 3.74342900  |
| H | 0.32495200  | -5.52227300 | 3.07268700  |
| H | -0.54496200 | -1.79532000 | 2.88805700  |
| H | -1.09387400 | -3.33428300 | 3.56577700  |
| H | 0.37112900  | -2.57271200 | 4.19029600  |
| C | 0.22037300  | -2.95133400 | -2.86400400 |
| C | -0.74006200 | -1.91238800 | -3.47494500 |
| C | 0.48603400  | -4.10929000 | -3.84618700 |
| H | 1.17559300  | -2.44479600 | -2.69628900 |
| H | -0.89137700 | -1.06748700 | -2.79477500 |
| H | -0.33431200 | -1.52544400 | -4.41545500 |
| H | -1.71992100 | -2.35034400 | -3.69128200 |
| H | 1.19043100  | -4.83557500 | -3.42880800 |
| H | -0.43518100 | -4.64571900 | -4.09480600 |
| H | 0.90807000  | -3.72565900 | -4.78054700 |
| C | 3.92581700  | 0.06227400  | 2.36438300  |
| C | 3.06461700  | 0.82086500  | 3.39317900  |
| C | 5.28884900  | -0.33503200 | 2.96597800  |
| H | 3.39622100  | -0.86411700 | 2.12177800  |
| H | 2.08707600  | 1.09083200  | 2.98168900  |
| H | 2.90156100  | 0.19924300  | 4.27944000  |
| H | 3.55287200  | 1.74286100  | 3.72461800  |
| H | 5.89071400  | -0.91078600 | 2.25556500  |
| H | 5.86968800  | 0.54675100  | 3.25462700  |
| H | 5.14473900  | -0.94632600 | 3.86250900  |
| C | 3.45211900  | 0.61413900  | -2.74831200 |
| C | 4.65225900  | 0.47995500  | -3.70608300 |
| C | 2.34983000  | 1.50168200  | -3.35871100 |
| H | 3.02622300  | -0.38601800 | -2.62248700 |
| H | 5.42685700  | -0.17158600 | -3.28971700 |
| H | 4.32963900  | 0.05540200  | -4.66217400 |
| H | 5.11213700  | 1.45119900  | -3.91414400 |
| H | 1.47742300  | 1.55811500  | -2.69910100 |
| H | 2.70662500  | 2.52237100  | -3.53032100 |
| H | 2.02513700  | 1.09654200  | -4.32272800 |
| O | -0.39665700 | 2.75839600  | 2.41895400  |



|                                              |                             |
|----------------------------------------------|-----------------------------|
| Zero-point correction=                       | 0.789068 (Hartree/Particle) |
| Thermal correction to Energy=                | 0.839274                    |
| Thermal correction to Enthalpy=              | 0.840218                    |
| Thermal correction to Gibbs Free Energy=     | 0.694521                    |
| Sum of electronic and zero-point Energies=   | -2098.801040                |
| Sum of electronic and thermal Energies=      | -2098.750834                |
| Sum of electronic and thermal Enthalpies=    | -2098.749890                |
| Sum of electronic and thermal Free Energies= | -2098.895588                |

1-TS1'-2

|    |             |             |             |
|----|-------------|-------------|-------------|
| C  | -3.04811000 | 3.04070300  | -0.72261100 |
| O  | -2.40878800 | 3.53341900  | -1.64862300 |
| C  | -4.33459700 | 3.59332400  | -0.22749800 |
| C  | -4.93772500 | 4.63381500  | -0.95177400 |
| C  | -4.94556400 | 3.10875200  | 0.94142400  |
| C  | -6.14348600 | 5.17435500  | -0.51632500 |
| H  | -4.44533800 | 4.99729100  | -1.84740000 |
| C  | -6.15105600 | 3.65683700  | 1.37581400  |
| C  | -6.75118700 | 4.68636900  | 0.64573300  |
| H  | -6.61219300 | 5.97634800  | -1.07804900 |
| H  | -6.61785900 | 3.29087500  | 2.28510100  |
| C  | -2.54596700 | 1.84240900  | -0.07072800 |
| C  | -2.05924300 | 0.84124100  | 0.43679500  |
| C  | -1.59585000 | -0.29283000 | 1.03966500  |
| C  | -0.61862300 | -1.08498300 | 1.35688900  |
| C  | -0.47260500 | -2.24500500 | 2.23195900  |
| C  | -1.22358700 | -2.36057600 | 3.42205300  |
| C  | 0.45369100  | -3.25834500 | 1.91412200  |
| C  | -1.04926400 | -3.46202600 | 4.25702500  |
| C  | 0.60380500  | -4.36772100 | 2.74245000  |
| H  | 1.04146100  | -3.17197300 | 1.00574800  |
| C  | -0.14248300 | -4.47053100 | 3.91881000  |
| H  | -1.62259100 | -3.53220000 | 5.17647900  |
| H  | 1.31129500  | -5.14675000 | 2.47567400  |
| H  | -0.01394500 | -5.32820100 | 4.57198300  |
| H  | -7.69060300 | 5.11278800  | 0.98466800  |
| H  | -4.46315700 | 2.32487200  | 1.51992900  |
| H  | -1.93146000 | -1.58339400 | 3.68158900  |
| Au | 1.06083500  | -0.26720000 | 0.33521800  |
| C  | 2.72823300  | 0.48518900  | -0.55799600 |
| C  | 4.57409300  | 1.72521600  | -0.95379400 |
| C  | 4.35159400  | 0.96143000  | -2.05407000 |
| H  | 4.88490300  | 0.88443800  | -2.98767000 |

|   |             |             |             |
|---|-------------|-------------|-------------|
| H | 5.34081800  | 2.45005000  | -0.73292200 |
| N | 3.57003800  | 1.42161700  | -0.04495400 |
| N | 3.21770600  | 0.20289000  | -1.79465700 |
| C | 3.44897200  | 2.04139500  | 1.26006300  |
| C | 2.75245600  | 3.26238900  | 1.35898500  |
| C | 4.06330800  | 1.41405500  | 2.36233500  |
| C | 2.67535200  | 3.85227700  | 2.62672700  |
| C | 3.94968600  | 2.05050900  | 3.60445500  |
| C | 3.26399700  | 3.25460000  | 3.73755300  |
| H | 2.14823500  | 4.79384900  | 2.74282500  |
| H | 4.41009600  | 1.59862700  | 4.47744900  |
| H | 3.19238600  | 3.73169600  | 4.71048000  |
| C | 2.66985600  | -0.75980900 | -2.72961700 |
| C | 3.23520300  | -2.05085600 | -2.76374700 |
| C | 1.63430200  | -0.35090100 | -3.59367400 |
| C | 2.72629900  | -2.94801600 | -3.71057500 |
| C | 1.16680700  | -1.29290400 | -4.51897100 |
| C | 1.70515900  | -2.57490500 | -4.58010600 |
| H | 3.13972500  | -3.94989500 | -3.77055900 |
| H | 0.37360800  | -1.01306700 | -5.20501400 |
| H | 1.33013900  | -3.28546700 | -5.31084400 |
| C | 4.36872400  | -2.48775800 | -1.83966800 |
| C | 5.67332500  | -2.71877200 | -2.62860300 |
| C | 3.99261000  | -3.73583800 | -1.01893800 |
| H | 4.55827600  | -1.68181100 | -1.12445800 |
| H | 5.97458600  | -1.82169300 | -3.17876100 |
| H | 6.48832000  | -2.98895300 | -1.94936400 |
| H | 5.56146900  | -3.53009100 | -3.35523900 |
| H | 3.08243900  | -3.56587300 | -0.43493400 |
| H | 3.82358100  | -4.60799100 | -1.65844700 |
| H | 4.80035700  | -3.98867000 | -0.32449700 |
| C | 1.03370000  | 1.05123500  | -3.57184900 |
| C | -0.49898700 | 1.01632900  | -3.41921100 |
| C | 1.44846200  | 1.85188700  | -4.82256600 |
| H | 1.42937000  | 1.57924300  | -2.69956600 |
| H | -0.79539400 | 0.39789300  | -2.56607300 |
| H | -0.89101900 | 2.02347600  | -3.25160700 |
| H | -0.98399200 | 0.61029300  | -4.31353800 |
| H | 2.53702000  | 1.93505900  | -4.90514700 |
| H | 1.08134200  | 1.37535300  | -5.73761500 |
| H | 1.03230200  | 2.86352200  | -4.78172100 |
| C | 4.84878800  | 0.11098500  | 2.24827200  |
| C | 4.26053300  | -0.99345500 | 3.14710100  |
| C | 6.34405100  | 0.33491700  | 2.55072400  |

|                                              |             |             |                             |
|----------------------------------------------|-------------|-------------|-----------------------------|
| H                                            | 4.77595300  | -0.24306400 | 1.21556600                  |
| H                                            | 3.20838200  | -1.18190100 | 2.91127700                  |
| H                                            | 4.81499200  | -1.92750700 | 3.00842200                  |
| H                                            | 4.32419700  | -0.72778600 | 4.20714000                  |
| H                                            | 6.77962600  | 1.08781900  | 1.88618300                  |
| H                                            | 6.49743600  | 0.67310000  | 3.58064700                  |
| H                                            | 6.90314100  | -0.59727500 | 2.41989600                  |
| C                                            | 2.10802400  | 3.95342500  | 0.16071500                  |
| C                                            | 2.83374500  | 5.27032800  | -0.17990300                 |
| C                                            | 0.60192500  | 4.19014800  | 0.38051000                  |
| H                                            | 2.20540900  | 3.29487800  | -0.70760600                 |
| H                                            | 3.89541500  | 5.10339800  | -0.38907100                 |
| H                                            | 2.38347000  | 5.73596800  | -1.06246100                 |
| H                                            | 2.76751800  | 5.98651700  | 0.64562100                  |
| H                                            | 0.09004500  | 3.25791500  | 0.63662000                  |
| H                                            | 0.42015200  | 4.90735300  | 1.18791500                  |
| H                                            | 0.14028200  | 4.58709300  | -0.52851900                 |
| C                                            | -5.10080200 | -0.92215400 | 0.34261100                  |
| C                                            | -5.88874900 | -1.65678600 | -0.53464700                 |
| C                                            | -5.65375000 | -3.01624000 | -0.74160200                 |
| C                                            | -4.60391100 | -3.60550900 | -0.03508100                 |
| C                                            | -3.82593100 | -2.86106200 | 0.84108000                  |
| H                                            | -6.26592200 | -3.59414700 | -1.42287200                 |
| H                                            | -5.23097800 | 0.13019900  | 0.55013800                  |
| H                                            | -3.00754300 | -3.25491600 | 1.42754100                  |
| Cl                                           | -4.25086100 | -5.29134300 | -0.23344100                 |
| Cl                                           | -7.17393400 | -0.85007800 | -1.37203000                 |
| N                                            | -4.09100100 | -1.53825700 | 1.01204000                  |
| O                                            | -3.36480300 | -0.83353000 | 1.85574500                  |
| Zero-point correction=                       |             |             | 0.859754 (Hartree/Particle) |
| Thermal correction to Energy=                |             |             | 0.917479                    |
| Thermal correction to Enthalpy=              |             |             | 0.918423                    |
| Thermal correction to Gibbs Free Energy=     |             |             | 0.755341                    |
| Sum of electronic and zero-point Energies=   |             |             | -3266.135644                |
| Sum of electronic and thermal Energies=      |             |             | -3266.077920                |
| Sum of electronic and thermal Enthalpies=    |             |             | -3266.076975                |
| Sum of electronic and thermal Free Energies= |             |             | -3266.240057                |

#### 1-TS1'-3

|   |            |             |            |
|---|------------|-------------|------------|
| C | 5.62063500 | -1.06946000 | 0.10356000 |
| O | 5.99629500 | 0.10256700  | 0.07863500 |
| C | 6.52672100 | -2.23134200 | 0.21027300 |
| C | 6.04365100 | -3.54882100 | 0.16710900 |

|    |             |             |             |
|----|-------------|-------------|-------------|
| C  | 7.90393800  | -1.99282400 | 0.35328800  |
| C  | 6.93006600  | -4.61798700 | 0.26740400  |
| H  | 4.97958700  | -3.73299900 | 0.04787400  |
| C  | 8.78471800  | -3.06364800 | 0.45506800  |
| C  | 8.29881400  | -4.37551500 | 0.41232100  |
| H  | 6.55858500  | -5.63717900 | 0.23109600  |
| H  | 9.84899000  | -2.88227300 | 0.56727100  |
| C  | 4.18810300  | -1.30191700 | 0.02765000  |
| C  | 2.95950400  | -1.36800500 | 0.00026200  |
| C  | 1.62175500  | -1.44764900 | -0.01772300 |
| C  | 0.41242900  | -1.89315700 | 0.05921000  |
| C  | 0.04036200  | -3.30588700 | 0.29206600  |
| C  | -1.23331000 | -3.78308200 | -0.06900900 |
| C  | 0.95944700  | -4.20369000 | 0.87406600  |
| C  | -1.56954700 | -5.12081100 | 0.13021300  |
| C  | 0.61156600  | -5.53304900 | 1.08686700  |
| H  | 1.93958100  | -3.84777800 | 1.17596400  |
| C  | -0.65286800 | -5.99795000 | 0.71137400  |
| H  | -2.55384700 | -5.47203300 | -0.16301900 |
| H  | 1.32626900  | -6.20940400 | 1.54584600  |
| H  | -0.92058100 | -7.03728000 | 0.87554200  |
| H  | 8.98924400  | -5.20997300 | 0.49100800  |
| H  | 8.25548000  | -0.96709000 | 0.38227600  |
| H  | -1.95097200 | -3.10586300 | -0.51873700 |
| Au | -1.14243900 | -0.45610400 | -0.00129600 |
| C  | -2.78684600 | 0.75008100  | 0.02558100  |
| C  | -4.19768100 | 2.50200300  | 0.25901300  |
| C  | -4.93704200 | 1.43402800  | -0.13477000 |
| H  | -5.99254900 | 1.33116900  | -0.32821800 |
| H  | -4.47722000 | 3.51933200  | 0.48035300  |
| N  | -2.88113700 | 2.06693600  | 0.35232300  |
| N  | -4.05857400 | 0.36751800  | -0.27161900 |
| C  | -1.78548200 | 2.92375200  | 0.75664500  |
| C  | -1.44338700 | 2.97883200  | 2.12260700  |
| C  | -1.14282300 | 3.69982200  | -0.22854900 |
| C  | -0.40945100 | 3.85084600  | 2.48898300  |
| C  | -0.12310300 | 4.55969800  | 0.19876500  |
| C  | 0.24038600  | 4.63743100  | 1.54105100  |
| H  | -0.12218200 | 3.92546800  | 3.53313700  |
| H  | 0.38580900  | 5.18343700  | -0.52968700 |
| H  | 1.02808900  | 5.31805000  | 1.85103900  |
| C  | -4.46192200 | -0.96698500 | -0.66617000 |
| C  | -4.43704400 | -1.30170700 | -2.03530500 |
| C  | -4.88774800 | -1.86194800 | 0.33633700  |

|   |             |             |             |
|---|-------------|-------------|-------------|
| C | -4.84886100 | -2.59388300 | -2.38558900 |
| C | -5.29271400 | -3.13810000 | -0.07551100 |
| C | -5.27323400 | -3.50247600 | -1.41941800 |
| H | -4.84416100 | -2.88800100 | -3.43038300 |
| H | -5.63267000 | -3.85281200 | 0.66757600  |
| H | -5.59810300 | -4.49545300 | -1.71625300 |
| C | -4.00339200 | -0.32492600 | -3.12441600 |
| C | -5.17165200 | 0.00597700  | -4.07446800 |
| C | -2.78220000 | -0.84901700 | -3.90468900 |
| H | -3.69990400 | 0.60998800  | -2.64398100 |
| H | -6.03040500 | 0.41076500  | -3.52960100 |
| H | -4.85995600 | 0.74852100  | -4.81597700 |
| H | -5.51152800 | -0.88217400 | -4.61682600 |
| H | -1.93599900 | -1.03802500 | -3.23640100 |
| H | -3.00979100 | -1.78089700 | -4.43239600 |
| H | -2.46798800 | -0.11433500 | -4.65324100 |
| C | -4.93019500 | -1.49616600 | 1.81714900  |
| C | -4.02272400 | -2.41606300 | 2.65656900  |
| C | -6.37551700 | -1.50012200 | 2.35379500  |
| H | -4.54561500 | -0.47826700 | 1.92954300  |
| H | -2.98910000 | -2.39039600 | 2.29832700  |
| H | -4.03049900 | -2.09925700 | 3.70461600  |
| H | -4.36323300 | -3.45608000 | 2.62485900  |
| H | -7.01820700 | -0.82137000 | 1.78410400  |
| H | -6.82020400 | -2.49924500 | 2.30194800  |
| H | -6.39272700 | -1.18369700 | 3.40164600  |
| C | -1.52226200 | 3.64888100  | -1.70556300 |
| C | -0.32266300 | 3.25147800  | -2.58747600 |
| C | -2.13856600 | 4.98330100  | -2.17097500 |
| H | -2.28347500 | 2.87416200  | -1.83496700 |
| H | 0.10454000  | 2.29828900  | -2.26200700 |
| H | -0.63952700 | 3.15259400  | -3.63085300 |
| H | 0.46566800  | 4.01157600  | -2.55721000 |
| H | -3.01831300 | 5.25079200  | -1.57688100 |
| H | -1.42024300 | 5.80557400  | -2.08796500 |
| H | -2.44646700 | 4.91554700  | -3.21934200 |
| C | -2.14994900 | 2.15352000  | 3.19411300  |
| C | -2.85918200 | 3.05500900  | 4.22389000  |
| C | -1.17743100 | 1.17695200  | 3.88359000  |
| H | -2.92034700 | 1.54860600  | 2.70741200  |
| H | -3.57244900 | 3.73077500  | 3.74169500  |
| H | -3.40703500 | 2.44398000  | 4.94822300  |
| H | -2.14477400 | 3.66848400  | 4.78215400  |
| H | -0.71454500 | 0.50208300  | 3.15631300  |

|                                              |             |            |                             |
|----------------------------------------------|-------------|------------|-----------------------------|
| H                                            | -0.37824300 | 1.70935500 | 4.41007900                  |
| H                                            | -1.71022000 | 0.56832700 | 4.62139700                  |
| C                                            | 3.32596300  | 1.53150500 | -1.68738100                 |
| C                                            | 4.46092800  | 2.32988900 | -1.67262100                 |
| C                                            | 4.79859400  | 3.07407300 | -0.54380100                 |
| C                                            | 3.95343300  | 2.98246000 | 0.56138800                  |
| C                                            | 2.82051100  | 2.18273300 | 0.53430100                  |
| H                                            | 5.68809500  | 3.69071000 | -0.52241500                 |
| H                                            | 3.00411700  | 0.93547100 | -2.52882600                 |
| H                                            | 2.11517300  | 2.08362700 | 1.34635300                  |
| Cl                                           | 4.30378400  | 3.87735700 | 2.00850800                  |
| Cl                                           | 5.46075200  | 2.37802800 | -3.08877300                 |
| N                                            | 2.51969600  | 1.48147900 | -0.59230200                 |
| O                                            | 1.44785100  | 0.73341500 | -0.61999100                 |
| Zero-point correction=                       |             |            | 0.859195 (Hartree/Particle) |
| Thermal correction to Energy=                |             |            | 0.916907                    |
| Thermal correction to Enthalpy=              |             |            | 0.917851                    |
| Thermal correction to Gibbs Free Energy=     |             |            | 0.754891                    |
| Sum of electronic and zero-point Energies=   |             |            | -3266.128066                |
| Sum of electronic and thermal Energies=      |             |            | -3266.070355                |
| Sum of electronic and thermal Enthalpies=    |             |            | -3266.069411                |
| Sum of electronic and thermal Free Energies= |             |            | -3266.232370                |

#### 1-INT1'-1

|   |             |             |             |
|---|-------------|-------------|-------------|
| C | 3.04612200  | 2.86093700  | 0.87234900  |
| O | 2.39762700  | 3.26999900  | 1.83157400  |
| C | 4.32685100  | 3.49078700  | 0.44297800  |
| C | 4.93090900  | 4.42361700  | 1.30024100  |
| C | 4.92658900  | 3.19110800  | -0.79073700 |
| C | 6.12665400  | 5.03419500  | 0.93393500  |
| H | 4.44603200  | 4.65106800  | 2.24360800  |
| C | 6.11980400  | 3.81078400  | -1.15861400 |
| C | 6.72291300  | 4.72805300  | -0.29392600 |
| H | 6.59527800  | 5.75141900  | 1.60073400  |
| H | 6.57329300  | 3.59075200  | -2.12042200 |
| C | 2.59202900  | 1.70379400  | 0.12054800  |
| C | 2.16647300  | 0.71970500  | -0.46238800 |
| C | 1.81241400  | -0.44754000 | -1.16600300 |
| C | 0.61954100  | -1.07154400 | -1.28182300 |
| C | 0.45571900  | -2.30139400 | -2.09135700 |
| C | -0.19530300 | -3.41857100 | -1.52970700 |
| C | 0.90650600  | -2.39201200 | -3.42379100 |
| C | -0.35535000 | -4.59504200 | -2.26163200 |

|    |             |             |             |
|----|-------------|-------------|-------------|
| C  | 0.71186500  | -3.55841800 | -4.16296900 |
| H  | 1.38749000  | -1.53580800 | -3.88492000 |
| C  | 0.09138800  | -4.66743300 | -3.58327800 |
| H  | -0.84775300 | -5.44867200 | -1.80523300 |
| H  | 1.04773400  | -3.60071900 | -5.19493300 |
| H  | -0.05275500 | -5.57601900 | -4.15983400 |
| H  | 7.65294700  | 5.21040800  | -0.57968200 |
| H  | 4.43306800  | 2.50448100  | -1.47352800 |
| H  | -0.57308400 | -3.35327000 | -0.51349800 |
| Au | -1.03780500 | -0.25677900 | -0.35634700 |
| C  | -2.70592700 | 0.54848200  | 0.53083300  |
| C  | -4.51173300 | 1.84896600  | 0.94786500  |
| C  | -4.35152400 | 1.02281400  | 2.01236800  |
| H  | -4.91334500 | 0.92135200  | 2.92673900  |
| H  | -5.24156100 | 2.61570700  | 0.74424800  |
| N  | -3.49643500 | 1.54612800  | 0.04950300  |
| N  | -3.24335500 | 0.22980400  | 1.74020800  |
| C  | -3.33120800 | 2.21138200  | -1.22689500 |
| C  | -2.60263100 | 3.41663300  | -1.26655100 |
| C  | -3.93843100 | 1.64382300  | -2.36500500 |
| C  | -2.48811600 | 4.05486900  | -2.50781800 |
| C  | -3.78626300 | 2.32519300  | -3.57887200 |
| C  | -3.07052000 | 3.51680600  | -3.65183600 |
| H  | -1.93533600 | 4.98654900  | -2.57708500 |
| H  | -4.23999000 | 1.91844800  | -4.47727000 |
| H  | -2.96979000 | 4.03034200  | -4.60352300 |
| C  | -2.76973200 | -0.81297600 | 2.62687000  |
| C  | -3.38017200 | -2.08166300 | 2.55021500  |
| C  | -1.75109800 | -0.50762600 | 3.55109400  |
| C  | -2.93271800 | -3.06409700 | 3.44197400  |
| C  | -1.34772300 | -1.52979400 | 4.41988400  |
| C  | -1.92982300 | -2.79301200 | 4.36882500  |
| H  | -3.38096800 | -4.05248200 | 3.41263900  |
| H  | -0.56893900 | -1.32797300 | 5.14856700  |
| H  | -1.60448900 | -3.56813100 | 5.05670000  |
| C  | -4.48868200 | -2.41420500 | 1.55492100  |
| C  | -5.79551900 | -2.80289300 | 2.27377100  |
| C  | -4.04867000 | -3.51347000 | 0.56885700  |
| H  | -4.69915200 | -1.51865400 | 0.96335700  |
| H  | -6.12975300 | -2.01209100 | 2.95278300  |
| H  | -6.59204600 | -2.98260500 | 1.54453200  |
| H  | -5.67418400 | -3.71696900 | 2.86403500  |
| H  | -3.15365800 | -3.21242400 | 0.01552300  |
| H  | -3.82800700 | -4.45255400 | 1.08727000  |

|                        |             |             |                             |
|------------------------|-------------|-------------|-----------------------------|
| H                      | -4.84446800 | -3.71471300 | -0.15598400                 |
| C                      | -1.09143000 | 0.86453900  | 3.64081100                  |
| C                      | 0.43384000  | 0.77201700  | 3.44407700                  |
| C                      | -1.44151500 | 1.57091600  | 4.96538800                  |
| H                      | -1.48120000 | 1.48419600  | 2.82863500                  |
| H                      | 0.67570400  | 0.23516900  | 2.52138000                  |
| H                      | 0.87460800  | 1.76998100  | 3.36965800                  |
| H                      | 0.91462500  | 0.24894600  | 4.27833800                  |
| H                      | -2.52345000 | 1.68826000  | 5.08533000                  |
| H                      | -1.07063600 | 1.00833000  | 5.82868400                  |
| H                      | -0.98640300 | 2.56604700  | 4.99562200                  |
| C                      | -4.74877900 | 0.35201600  | -2.31954800                 |
| C                      | -4.13213300 | -0.73644400 | -3.21926500                 |
| C                      | -6.22576600 | 0.60393500  | -2.68250500                 |
| H                      | -4.72730500 | -0.02914400 | -1.29446400                 |
| H                      | -3.09453100 | -0.94193900 | -2.93777200                 |
| H                      | -4.70186200 | -1.66752500 | -3.13125600                 |
| H                      | -4.14333400 | -0.44131200 | -4.27363000                 |
| H                      | -6.68062100 | 1.34671800  | -2.01939900                 |
| H                      | -6.32999300 | 0.96785500  | -3.70979500                 |
| H                      | -6.80176300 | -0.32346100 | -2.59887700                 |
| C                      | -1.95693100 | 4.03825900  | -0.03214900                 |
| C                      | -2.64418600 | 5.36390600  | 0.35112400                  |
| C                      | -0.44082600 | 4.23165700  | -0.22174800                 |
| H                      | -2.08897300 | 3.34858900  | 0.80659800                  |
| H                      | -3.71347100 | 5.22373400  | 0.54069400                  |
| H                      | -2.19133100 | 5.78019900  | 1.25683600                  |
| H                      | -2.54406900 | 6.10919700  | -0.44481300                 |
| H                      | 0.04090200  | 3.29241600  | -0.50851300                 |
| H                      | -0.22355900 | 4.97483800  | -0.99648100                 |
| H                      | 0.02006200  | 4.57472700  | 0.70931100                  |
| C                      | 3.58723700  | -2.89727500 | -0.68065900                 |
| C                      | 4.49890900  | -3.56761100 | 0.12845400                  |
| C                      | 5.67464100  | -2.93265000 | 0.53994300                  |
| C                      | 5.91093400  | -1.61958800 | 0.12729000                  |
| C                      | 4.98542400  | -0.96491000 | -0.68178900                 |
| H                      | 6.39071800  | -3.45087400 | 1.16748700                  |
| H                      | 2.65449700  | -3.30811700 | -1.04876600                 |
| H                      | 5.08440700  | 0.05043700  | -1.04002600                 |
| Cl                     | 7.34128900  | -0.78261300 | 0.60850100                  |
| Cl                     | 4.16068300  | -5.19207700 | 0.60479200                  |
| N                      | 3.87482300  | -1.63201700 | -1.04696500                 |
| O                      | 2.99786400  | -0.98512000 | -1.89606300                 |
| Zero-point correction= |             |             | 0.861666 (Hartree/Particle) |



|                                              |              |
|----------------------------------------------|--------------|
| Thermal correction to Energy=                | 0.919130     |
| Thermal correction to Enthalpy=              | 0.920074     |
| Thermal correction to Gibbs Free Energy=     | 0.757584     |
| Sum of electronic and zero-point Energies=   | -3266.144719 |
| Sum of electronic and thermal Energies=      | -3266.087255 |
| Sum of electronic and thermal Enthalpies=    | -3266.086311 |
| Sum of electronic and thermal Free Energies= | -3266.248801 |

1-TS2'-1

|    |             |             |             |
|----|-------------|-------------|-------------|
| C  | 2.42039300  | 3.31370700  | 0.76989500  |
| O  | 1.52645800  | 3.71262600  | 1.51300000  |
| C  | 3.68647000  | 4.06684800  | 0.56360900  |
| C  | 3.89402500  | 5.23702600  | 1.31215800  |
| C  | 4.66083400  | 3.64672700  | -0.35476200 |
| C  | 5.06257900  | 5.97255700  | 1.14552100  |
| H  | 3.12663500  | 5.54586300  | 2.01376600  |
| C  | 5.82866500  | 4.38805700  | -0.52181000 |
| C  | 6.03090600  | 5.54920100  | 0.22851500  |
| H  | 5.22256000  | 6.87594300  | 1.72595500  |
| H  | 6.57901700  | 4.06671400  | -1.23789900 |
| C  | 2.25750200  | 2.05457300  | 0.05761900  |
| C  | 2.04957100  | 0.99673800  | -0.50908800 |
| C  | 1.94205200  | -0.25655800 | -1.18455900 |
| C  | 0.80021800  | -1.06063000 | -1.18335600 |
| C  | 0.81174300  | -2.37888500 | -1.83076800 |
| C  | 0.11782300  | -3.44254400 | -1.20902000 |
| C  | 1.44742600  | -2.63650700 | -3.06790700 |
| C  | 0.11155900  | -4.71814600 | -1.76456400 |
| C  | 1.39438400  | -3.90278400 | -3.64391800 |
| H  | 1.94110500  | -1.82894800 | -3.59438100 |
| C  | 0.74304200  | -4.95156300 | -2.98931500 |
| H  | -0.40704300 | -5.52492700 | -1.25566700 |
| H  | 1.86105800  | -4.07226400 | -4.60973500 |
| H  | 0.71254200  | -5.93931300 | -3.43921400 |
| H  | 6.94140500  | 6.12649700  | 0.09748500  |
| H  | 4.49291500  | 2.74779000  | -0.94029400 |
| H  | -0.39942300 | -3.25493300 | -0.27324400 |
| Au | -0.94673300 | -0.35397900 | -0.36926900 |
| C  | -2.72005200 | 0.36277200  | 0.39539900  |
| C  | -4.65380900 | 1.51413700  | 0.63214400  |
| C  | -4.44678100 | 0.82650400  | 1.78364400  |
| H  | -5.02505800 | 0.76624700  | 2.69137500  |
| H  | -5.45037800 | 2.17465900  | 0.33052300  |

|   |             |             |             |
|---|-------------|-------------|-------------|
| N | -3.58795900 | 1.21939100  | -0.20854900 |
| N | -3.26011600 | 0.12218300  | 1.62111900  |
| C | -3.47298400 | 1.72720100  | -1.56185000 |
| C | -2.87349000 | 2.98696000  | -1.76192000 |
| C | -4.00831800 | 0.95648100  | -2.61396000 |
| C | -2.82332600 | 3.47014400  | -3.07534700 |
| C | -3.92114600 | 1.48863100  | -3.90623200 |
| C | -3.33916000 | 2.73165600  | -4.13650600 |
| H | -2.37317700 | 4.43861100  | -3.26776900 |
| H | -4.32227400 | 0.92320500  | -4.74147400 |
| H | -3.28937800 | 3.12758700  | -5.14659500 |
| C | -2.73133300 | -0.79338300 | 2.61140400  |
| C | -3.22226400 | -2.11554800 | 2.62301200  |
| C | -1.78453500 | -0.31936100 | 3.54046800  |
| C | -2.72239900 | -2.97738700 | 3.60688800  |
| C | -1.32534700 | -1.22647300 | 4.50439500  |
| C | -1.78553600 | -2.53951900 | 4.53895100  |
| H | -3.07858500 | -4.00216600 | 3.64746400  |
| H | -0.60079700 | -0.89479100 | 5.24135100  |
| H | -1.41817300 | -3.22272900 | 5.29926500  |
| C | -4.26639700 | -2.62581600 | 1.63355400  |
| C | -5.56194300 | -3.05035000 | 2.35328600  |
| C | -3.71513200 | -3.77257300 | 0.76452900  |
| H | -4.52567600 | -1.80788900 | 0.95553800  |
| H | -5.97598500 | -2.23186700 | 2.95047400  |
| H | -6.31987200 | -3.35513500 | 1.62444800  |
| H | -5.38903400 | -3.89676500 | 3.02582400  |
| H | -2.83438900 | -3.45152800 | 0.19986100  |
| H | -3.43299400 | -4.63899200 | 1.37189000  |
| H | -4.47410000 | -4.10411300 | 0.04821700  |
| C | -1.27072600 | 1.11637500  | 3.54606900  |
| C | 0.26702700  | 1.17577900  | 3.49290100  |
| C | -1.81440400 | 1.89511000  | 4.76078000  |
| H | -1.63876800 | 1.61567300  | 2.64548300  |
| H | 0.65062600  | 0.60296100  | 2.64258400  |
| H | 0.59973600  | 2.20942600  | 3.36988400  |
| H | 0.71932800  | 0.77623000  | 4.40731000  |
| H | -2.90909300 | 1.90983900  | 4.77286900  |
| H | -1.47813000 | 1.44846800  | 5.70257200  |
| H | -1.46136300 | 2.93098800  | 4.73611900  |
| C | -4.68025300 | -0.39718900 | -2.40238200 |
| C | -3.93704200 | -1.52200100 | -3.14887900 |
| C | -6.16842200 | -0.35312900 | -2.80280900 |
| H | -4.63952800 | -0.63853000 | -1.33636700 |

|                                              |             |             |                             |
|----------------------------------------------|-------------|-------------|-----------------------------|
| H                                            | -2.89157900 | -1.58517500 | -2.83088400                 |
| H                                            | -4.41372700 | -2.48778000 | -2.95032900                 |
| H                                            | -3.95081000 | -1.36328800 | -4.23216300                 |
| H                                            | -6.70932300 | 0.42209000  | -2.25086600                 |
| H                                            | -6.29123900 | -0.14682000 | -3.87098300                 |
| H                                            | -6.64785800 | -1.31515100 | -2.59394800                 |
| C                                            | -2.31070400 | 3.82649900  | -0.61961900                 |
| C                                            | -3.24143300 | 5.01258400  | -0.29325400                 |
| C                                            | -0.88088900 | 4.31687700  | -0.91133700                 |
| H                                            | -2.25548400 | 3.19499500  | 0.27210200                  |
| H                                            | -4.24721400 | 4.67688600  | -0.02033600                 |
| H                                            | -2.83994600 | 5.59291800  | 0.54370700                  |
| H                                            | -3.33812100 | 5.68457900  | -1.15258500                 |
| H                                            | -0.22870300 | 3.48545700  | -1.19394500                 |
| H                                            | -0.86249500 | 5.05446000  | -1.72064200                 |
| H                                            | -0.45656500 | 4.78728400  | -0.02026900                 |
| C                                            | 3.79529800  | -1.79506400 | 0.34883700                  |
| C                                            | 4.75371800  | -2.44001000 | 1.13335700                  |
| C                                            | 6.04816600  | -2.61400900 | 0.63827000                  |
| C                                            | 6.35438400  | -2.13361000 | -0.63950300                 |
| C                                            | 5.37011500  | -1.49167400 | -1.39124300                 |
| H                                            | 6.80370400  | -3.11333400 | 1.23379700                  |
| H                                            | 2.76303600  | -1.61652900 | 0.64540600                  |
| H                                            | 5.51658300  | -1.08669000 | -2.38564900                 |
| Cl                                           | 7.94098700  | -2.32094300 | -1.29957400                 |
| Cl                                           | 4.32079200  | -3.01779700 | 2.70470600                  |
| N                                            | 4.16244700  | -1.36564000 | -0.84828600                 |
| O                                            | 3.06936600  | -0.64074400 | -1.83334500                 |
| Zero-point correction=                       |             |             | 0.859993 (Hartree/Particle) |
| Thermal correction to Energy=                |             |             | 0.917264                    |
| Thermal correction to Enthalpy=              |             |             | 0.918208                    |
| Thermal correction to Gibbs Free Energy=     |             |             | 0.756656                    |
| Sum of electronic and zero-point Energies=   |             |             | -3266.139337                |
| Sum of electronic and thermal Energies=      |             |             | -3266.082067                |
| Sum of electronic and thermal Enthalpies=    |             |             | -3266.081122                |
| Sum of electronic and thermal Free Energies= |             |             | -3266.242674                |

1-INT2'-1

|   |            |             |             |
|---|------------|-------------|-------------|
| C | 4.61742700 | -0.44737300 | 0.85145700  |
| O | 4.04384200 | -0.79124100 | 1.87894200  |
| C | 6.08193100 | -0.32432100 | 0.71319400  |
| C | 6.88257600 | -0.56664000 | 1.84332400  |
| C | 6.68025200 | 0.02048300  | -0.50983200 |

|    |             |             |             |
|----|-------------|-------------|-------------|
| C  | 8.26491400  | -0.46196500 | 1.74700700  |
| H  | 6.39970400  | -0.83355500 | 2.77724400  |
| C  | 8.06614900  | 0.12250400  | -0.60089000 |
| C  | 8.85700400  | -0.11752300 | 0.52583000  |
| H  | 8.88554900  | -0.64800900 | 2.61784200  |
| H  | 8.53027700  | 0.38489300  | -1.54625000 |
| C  | 3.77840300  | -0.13727000 | -0.31526700 |
| C  | 2.97871200  | 0.08355800  | -1.20558400 |
| C  | 1.98603800  | 0.38957700  | -2.21019100 |
| C  | 0.88318700  | 1.27910500  | -1.74179100 |
| C  | 0.89294400  | 2.64053200  | -2.13566500 |
| C  | -0.13114900 | 3.52128800  | -1.67281300 |
| C  | 1.91257600  | 3.17249800  | -2.98499000 |
| C  | -0.12766500 | 4.85835100  | -2.02985900 |
| C  | 1.89956000  | 4.50718100  | -3.34760300 |
| H  | 2.68612300  | 2.51573400  | -3.36724200 |
| C  | 0.88414600  | 5.34903500  | -2.86800600 |
| H  | -0.90485200 | 5.52394500  | -1.66988800 |
| H  | 2.66996200  | 4.90415300  | -4.00004300 |
| H  | 0.88099600  | 6.39716800  | -3.15325400 |
| H  | 9.93759900  | -0.03798200 | 0.45345500  |
| H  | 6.06191000  | 0.19906400  | -1.38453000 |
| H  | -0.90605500 | 3.12262400  | -1.02631300 |
| Au | -0.49010900 | 0.31454800  | -0.60915900 |
| C  | -1.84365900 | -0.68431300 | 0.56918400  |
| C  | -3.34048200 | -1.15477100 | 2.19227400  |
| C  | -3.12928100 | -2.29646200 | 1.48453100  |
| H  | -3.54369800 | -3.28606400 | 1.59067300  |
| H  | -3.97254100 | -0.95033500 | 3.04142100  |
| N  | -2.54737900 | -0.17477700 | 1.61469000  |
| N  | -2.20688900 | -1.99145600 | 0.49554600  |
| C  | -2.48048000 | 1.19951100  | 2.07027600  |
| C  | -1.46479300 | 1.55986200  | 2.97919300  |
| C  | -3.44799100 | 2.10837200  | 1.59492200  |
| C  | -1.43497000 | 2.89436100  | 3.40458500  |
| C  | -3.36577100 | 3.42811700  | 2.05623300  |
| C  | -2.37153300 | 3.81852800  | 2.94989400  |
| H  | -0.66941500 | 3.21026300  | 4.10619500  |
| H  | -4.09585700 | 4.15640000  | 1.71675900  |
| H  | -2.33139100 | 4.84599600  | 3.29953300  |
| C  | -1.70520500 | -2.94721600 | -0.47408100 |
| C  | -2.35669200 | -3.04514800 | -1.72011100 |
| C  | -0.60396000 | -3.74958800 | -0.11385500 |
| C  | -1.85310200 | -3.98207000 | -2.63073700 |

|   |             |             |             |
|---|-------------|-------------|-------------|
| C | -0.14926200 | -4.67084800 | -1.06560500 |
| C | -0.76228100 | -4.78512900 | -2.31003500 |
| H | -2.32497600 | -4.08577400 | -3.60266500 |
| H | 0.69691900  | -5.30736700 | -0.82690200 |
| H | -0.39074100 | -5.50611400 | -3.03199000 |
| C | -3.56695000 | -2.19689200 | -2.09974100 |
| C | -4.81034800 | -3.07257400 | -2.35335600 |
| C | -3.26570200 | -1.29496400 | -3.31245700 |
| H | -3.80320100 | -1.53843800 | -1.25819500 |
| H | -5.04762300 | -3.69394700 | -1.48406500 |
| H | -5.68030700 | -2.44379100 | -2.56885600 |
| H | -4.66443800 | -3.73969500 | -3.20882300 |
| H | -2.40473700 | -0.64596800 | -3.12054400 |
| H | -3.04394400 | -1.88569600 | -4.20691500 |
| H | -4.12969100 | -0.66158800 | -3.53914900 |
| C | 0.09113100  | -3.65706500 | 1.24167600  |
| C | 1.57240700  | -3.26100700 | 1.09291500  |
| C | -0.05607300 | -4.96960700 | 2.03692800  |
| H | -0.39493000 | -2.86912600 | 1.82524500  |
| H | 1.68055900  | -2.31512500 | 0.55465900  |
| H | 2.03737800  | -3.13895400 | 2.07560000  |
| H | 2.13840300  | -4.02449100 | 0.54916300  |
| H | -1.10752100 | -5.23759800 | 2.18252500  |
| H | 0.43032800  | -5.80490000 | 1.52301800  |
| H | 0.40893600  | -4.87047300 | 3.02299100  |
| C | -4.55764400 | 1.71242300  | 0.62417300  |
| C | -4.44245000 | 2.47450500  | -0.71047300 |
| C | -5.95193000 | 1.90601300  | 1.25244500  |
| H | -4.44995500 | 0.64793800  | 0.39587800  |
| H | -3.47519200 | 2.29257300  | -1.19093400 |
| H | -5.22714700 | 2.15100100  | -1.40187600 |
| H | -4.55298700 | 3.55463300  | -0.56815300 |
| H | -6.05249500 | 1.34428500  | 2.18629000  |
| H | -6.14983000 | 2.95923000  | 1.47603800  |
| H | -6.73001900 | 1.56160500  | 0.56391700  |
| C | -0.42793700 | 0.57283700  | 3.50759800  |
| C | -0.56400700 | 0.37805100  | 5.03085100  |
| C | 1.00374600  | 0.99786300  | 3.12610600  |
| H | -0.61157100 | -0.39901200 | 3.04011300  |
| H | -1.56695800 | 0.03505500  | 5.30407900  |
| H | 0.15740000  | -0.36615600 | 5.38260500  |
| H | -0.37147500 | 1.30898100  | 5.57374200  |
| H | 1.10176200  | 1.13427300  | 2.04416900  |
| H | 1.28424300  | 1.93891900  | 3.61105900  |

|                                              |            |             |                             |
|----------------------------------------------|------------|-------------|-----------------------------|
| H                                            | 1.72725400 | 0.23554600  | 3.42911700                  |
| O                                            | 1.97565600 | -0.06508300 | -3.34453400                 |
| Zero-point correction=                       |            |             | 0.789593 (Hartree/Particle) |
| Thermal correction to Energy=                |            |             | 0.839818                    |
| Thermal correction to Enthalpy=              |            |             | 0.840762                    |
| Thermal correction to Gibbs Free Energy=     |            |             | 0.696013                    |
| Sum of electronic and zero-point Energies=   |            |             | -2098.794890                |
| Sum of electronic and thermal Energies=      |            |             | -2098.744665                |
| Sum of electronic and thermal Enthalpies=    |            |             | -2098.743721                |
| Sum of electronic and thermal Free Energies= |            |             | -2098.888471                |

### 3-TS1-2

|    |             |             |             |
|----|-------------|-------------|-------------|
| C  | 0.25064800  | -3.15600100 | -1.49901300 |
| O  | 0.17454900  | -3.73820700 | -2.58205600 |
| C  | -0.29747200 | -3.74490700 | -0.25240800 |
| C  | -1.16321200 | -4.84622700 | -0.38083000 |
| C  | 0.10328200  | -3.31753400 | 1.02528100  |
| C  | -1.62558700 | -5.50319300 | 0.75370400  |
| H  | -1.44737800 | -5.17377800 | -1.37475500 |
| C  | -0.35716900 | -3.98619100 | 2.15808500  |
| C  | -1.22114900 | -5.07601300 | 2.02396000  |
| H  | -2.29315500 | -6.35316500 | 0.65297600  |
| H  | -0.03309100 | -3.66490500 | 3.14285400  |
| C  | 0.97037000  | -1.87377800 | -1.42656800 |
| C  | 1.21467200  | -0.66026200 | -1.12365000 |
| C  | 2.14958900  | 0.33605900  | -1.31932400 |
| C  | 2.95286600  | 1.24617500  | -1.45440000 |
| C  | 3.92681100  | 2.26233500  | -1.63898000 |
| C  | 4.78015600  | 2.23053200  | -2.76289800 |
| C  | 4.05633400  | 3.30688700  | -0.69876000 |
| C  | 5.73718900  | 3.22465000  | -2.93868100 |
| C  | 5.02087800  | 4.29217900  | -0.88339800 |
| H  | 3.39987400  | 3.32672600  | 0.16514200  |
| C  | 5.86036800  | 4.25433600  | -2.00103800 |
| H  | 6.38934400  | 3.19760900  | -3.80599100 |
| H  | 5.12155700  | 5.09213500  | -0.15632000 |
| H  | 6.61034100  | 5.02684700  | -2.14107100 |
| H  | -1.57510100 | -5.59791100 | 2.90804800  |
| H  | 0.79549600  | -2.48894900 | 1.12877800  |
| H  | 4.67650200  | 1.42736100  | -3.48510600 |
| Au | -0.64189400 | 0.02318500  | -0.24671400 |
| C  | -2.26090000 | 1.05591700  | 0.41185800  |
| C  | -4.34800300 | 1.87689700  | 0.65365600  |

|   |             |             |             |
|---|-------------|-------------|-------------|
| C | -3.51656000 | 2.65208200  | 1.39624100  |
| H | -3.70871100 | 3.51334000  | 2.01539100  |
| H | -5.41310600 | 1.92400800  | 0.49519400  |
| N | -3.56342700 | 0.89936800  | 0.05658400  |
| N | -2.23783000 | 2.13697400  | 1.23562000  |
| C | -4.08734200 | -0.13584400 | -0.81336200 |
| C | -3.99022400 | 0.03885300  | -2.20880900 |
| C | -4.70555300 | -1.25446400 | -0.21772300 |
| C | -4.51552200 | -0.97828200 | -3.01598300 |
| C | -5.21836200 | -2.23304900 | -1.07767000 |
| C | -5.11955000 | -2.10207600 | -2.46011500 |
| H | -4.45927500 | -0.88163600 | -4.09550000 |
| H | -5.70438900 | -3.10804500 | -0.65815900 |
| H | -5.52402300 | -2.87458500 | -3.10729600 |
| C | -1.05194200 | 2.71400800  | 1.83695900  |
| C | -0.60636200 | 2.20577900  | 3.07357500  |
| C | -0.41894800 | 3.78150200  | 1.16874200  |
| C | 0.53310600  | 2.79674400  | 3.63326500  |
| C | 0.71127900  | 4.33687300  | 1.78226400  |
| C | 1.18543100  | 3.84956100  | 2.99754400  |
| H | 0.90811200  | 2.43367900  | 4.58498400  |
| H | 1.22038600  | 5.16810900  | 1.30427300  |
| H | 2.06103800  | 4.29873000  | 3.45692600  |
| C | -1.31698600 | 1.07790500  | 3.81548400  |
| C | -1.87046100 | 1.56143700  | 5.17077400  |
| C | -0.40161200 | -0.14841700 | 3.99379800  |
| H | -2.17146100 | 0.75572700  | 3.21279900  |
| H | -2.54839900 | 2.41158900  | 5.04623600  |
| H | -2.42363700 | 0.75605500  | 5.66456300  |
| H | -1.06679600 | 1.87381100  | 5.84529700  |
| H | -0.04580500 | -0.51827700 | 3.02672300  |
| H | 0.47406400  | 0.08703300  | 4.60732800  |
| H | -0.94734100 | -0.95740100 | 4.49067600  |
| C | -0.92081500 | 4.35354600  | -0.15444400 |
| C | 0.14871800  | 4.26386900  | -1.25947600 |
| C | -1.42137000 | 5.80168700  | 0.01926800  |
| H | -1.77400400 | 3.75422500  | -0.48626700 |
| H | 0.48902800  | 3.23388800  | -1.40260500 |
| H | -0.25951700 | 4.62445300  | -2.20920100 |
| H | 1.02536200  | 4.87658000  | -1.02616400 |
| H | -2.21112000 | 5.86709700  | 0.77451500  |
| H | -0.61160000 | 6.47044900  | 0.32830900  |
| H | -1.82357700 | 6.18111300  | -0.92547300 |
| C | -4.86762700 | -1.41101300 | 1.29230700  |

|                                            |             |             |                             |
|--------------------------------------------|-------------|-------------|-----------------------------|
| C                                          | -4.32075000 | -2.75576400 | 1.80397000                  |
| C                                          | -6.34218600 | -1.22606500 | 1.70679200                  |
| H                                          | -4.28736700 | -0.62381800 | 1.78368600                  |
| H                                          | -3.26893400 | -2.88877100 | 1.53839800                  |
| H                                          | -4.40663300 | -2.80272900 | 2.89461300                  |
| H                                          | -4.88046300 | -3.60377500 | 1.39659600                  |
| H                                          | -6.73464100 | -0.25401600 | 1.39109700                  |
| H                                          | -6.97708700 | -1.99805200 | 1.26002600                  |
| H                                          | -6.44564100 | -1.29530700 | 2.79446200                  |
| C                                          | -3.39465300 | 1.28477800  | -2.85877500                 |
| C                                          | -4.48987600 | 2.10846900  | -3.56720400                 |
| C                                          | -2.24725900 | 0.94138300  | -3.82761300                 |
| H                                          | -2.97230200 | 1.91602800  | -2.07140500                 |
| H                                          | -5.28908000 | 2.39266200  | -2.87532700                 |
| H                                          | -4.06451400 | 3.02457900  | -3.98965800                 |
| H                                          | -4.94555600 | 1.54379100  | -4.38694700                 |
| H                                          | -1.45521200 | 0.37749700  | -3.32432400                 |
| H                                          | -2.59786500 | 0.34416400  | -4.67522800                 |
| H                                          | -1.80760500 | 1.85892600  | -4.23173900                 |
| C                                          | 4.71918100  | -3.16076800 | -0.32420800                 |
| C                                          | 4.43040200  | -2.67266000 | -1.54094300                 |
| H                                          | 4.24917200  | -4.10061500 | -0.03067500                 |
| H                                          | 4.87852100  | -1.74939300 | -1.90056500                 |
| C                                          | 5.62913100  | -2.59345300 | 0.68090800                  |
| C                                          | 5.88626800  | -3.33096800 | 1.84988200                  |
| C                                          | 6.25808000  | -1.34260500 | 0.53255900                  |
| C                                          | 6.74598200  | -2.84558600 | 2.83418800                  |
| H                                          | 5.41050100  | -4.29988100 | 1.98050800                  |
| C                                          | 7.11458400  | -0.85681600 | 1.51558900                  |
| H                                          | 6.07403500  | -0.74294100 | -0.35365600                 |
| C                                          | 7.36437500  | -1.60581100 | 2.67010200                  |
| H                                          | 6.93443800  | -3.43610500 | 3.72589300                  |
| H                                          | 7.59234000  | 0.10949700  | 1.38218200                  |
| H                                          | 8.03647000  | -1.22462400 | 3.43305700                  |
| C                                          | 3.51823800  | -3.36224100 | -2.50096600                 |
| H                                          | 3.08249600  | -4.26383700 | -2.05220300                 |
| H                                          | 4.06124300  | -3.66395000 | -3.40847900                 |
| O                                          | 2.47259100  | -2.44665700 | -2.91377600                 |
| H                                          | 1.80248400  | -2.95507700 | -3.40685400                 |
| Zero-point correction=                     |             |             | 0.953387 (Hartree/Particle) |
| Thermal correction to Energy=              |             |             | 1.012813                    |
| Thermal correction to Enthalpy=            |             |             | 1.013757                    |
| Thermal correction to Gibbs Free Energy=   |             |             | 0.845889                    |
| Sum of electronic and zero-point Energies= |             |             | -2447.592368                |



|                                              |              |
|----------------------------------------------|--------------|
| Sum of electronic and thermal Energies=      | -2447.532942 |
| Sum of electronic and thermal Enthalpies=    | -2447.531998 |
| Sum of electronic and thermal Free Energies= | -2447.699865 |

### 3-TS1-1

|    |             |             |             |
|----|-------------|-------------|-------------|
| C  | 0.90603100  | 3.02304000  | -0.97092800 |
| O  | 1.20247300  | 2.97474400  | -2.14989500 |
| C  | 1.45592800  | 4.03287100  | -0.02902100 |
| C  | 2.32526700  | 5.00635800  | -0.55164200 |
| C  | 1.13782900  | 4.04622000  | 1.33806800  |
| C  | 2.86018600  | 5.98252300  | 0.28172700  |
| H  | 2.55878900  | 4.97973400  | -1.61057200 |
| C  | 1.68040700  | 5.02422600  | 2.17000300  |
| C  | 2.53863900  | 5.99221300  | 1.64332300  |
| H  | 3.52601800  | 6.73736400  | -0.12522200 |
| H  | 1.43353900  | 5.03279400  | 3.22721000  |
| C  | -0.05869400 | 1.95602100  | -0.42506100 |
| C  | -1.29233300 | 2.33370400  | -0.27994700 |
| C  | -2.25190000 | 3.29233500  | -0.32208100 |
| C  | -3.13623400 | 4.14147300  | -0.35830700 |
| C  | -4.13261700 | 5.14501900  | -0.41102000 |
| C  | -4.78841200 | 5.43084400  | -1.62949900 |
| C  | -4.47707400 | 5.86674900  | 0.75371200  |
| C  | -5.76614900 | 6.41780100  | -1.67486100 |
| C  | -5.45762100 | 6.85014400  | 0.69443500  |
| H  | -3.96885300 | 5.64535300  | 1.68627900  |
| C  | -6.10146000 | 7.12604700  | -0.51627900 |
| H  | -6.26774400 | 6.63814900  | -2.61168600 |
| H  | -5.72132200 | 7.40439700  | 1.58947700  |
| H  | -6.86573200 | 7.89614300  | -0.55725100 |
| H  | 2.95757100  | 6.75518200  | 2.29291200  |
| H  | 0.47117000  | 3.29509300  | 1.74789800  |
| H  | -4.51753000 | 4.87690000  | -2.52214900 |
| Au | 0.88183700  | 0.12437000  | -0.22096400 |
| C  | 1.92453700  | -1.62715500 | -0.09295400 |
| C  | 2.57681000  | -3.78475700 | -0.24864300 |
| C  | 3.63068800  | -3.07315200 | 0.22801300  |
| H  | 4.62594100  | -3.37659900 | 0.50991200  |
| H  | 2.46730400  | -4.83417900 | -0.46935500 |
| N  | 1.53773900  | -2.88299400 | -0.43984800 |
| N  | 3.21455900  | -1.75217500 | 0.31728600  |
| C  | 0.23309700  | -3.25283200 | -0.94828800 |
| C  | -0.73858800 | -3.70491500 | -0.03202000 |

|   |             |             |             |
|---|-------------|-------------|-------------|
| C | 0.00906100  | -3.18437000 | -2.33833500 |
| C | -1.97850800 | -4.09372100 | -0.55445000 |
| C | -1.25144600 | -3.58344300 | -2.80121400 |
| C | -2.23213400 | -4.03478700 | -1.92244000 |
| H | -2.75401700 | -4.44956100 | 0.11579100  |
| H | -1.46119000 | -3.55012100 | -3.86573700 |
| H | -3.19776000 | -4.35205600 | -2.30547800 |
| C | 4.05495900  | -0.66371500 | 0.77682500  |
| C | 4.83927600  | 0.02454100  | -0.17120700 |
| C | 4.06705700  | -0.36083300 | 2.15298100  |
| C | 5.65865300  | 1.05432400  | 0.30736100  |
| C | 4.90399700  | 0.68148300  | 2.57005300  |
| C | 5.69156900  | 1.38099600  | 1.66014000  |
| H | 6.28113900  | 1.60556400  | -0.38997400 |
| H | 4.94081000  | 0.94584500  | 3.62220200  |
| H | 6.33631300  | 2.18295400  | 2.00718200  |
| C | 4.84951400  | -0.32795200 | -1.65615300 |
| C | 6.18215400  | -0.99745400 | -2.05081800 |
| C | 4.56036000  | 0.89252800  | -2.55060500 |
| H | 4.05197400  | -1.05461400 | -1.83911900 |
| H | 6.37511200  | -1.89604200 | -1.45579500 |
| H | 6.16590300  | -1.28702500 | -3.10648700 |
| H | 7.02639600  | -0.31564100 | -1.90453900 |
| H | 3.60679500  | 1.36644700  | -2.29995000 |
| H | 5.34590800  | 1.65060500  | -2.46814500 |
| H | 4.51737600  | 0.58322900  | -3.59995600 |
| C | 3.21974400  | -1.10868400 | 3.17818300  |
| C | 2.18764200  | -0.17529800 | 3.84093900  |
| C | 4.09569600  | -1.80925200 | 4.23521500  |
| H | 2.65802700  | -1.88876400 | 2.65536500  |
| H | 1.53725100  | 0.28986100  | 3.09295800  |
| H | 1.55894800  | -0.73830200 | 4.53886700  |
| H | 2.67583100  | 0.62526000  | 4.40636500  |
| H | 4.81084200  | -2.49621400 | 3.77196500  |
| H | 4.66545800  | -1.08696300 | 4.82852800  |
| H | 3.47057800  | -2.38441400 | 4.92580300  |
| C | 1.07009400  | -2.72366800 | -3.33360400 |
| C | 0.62154000  | -1.46639600 | -4.10342400 |
| C | 1.45951300  | -3.86017300 | -4.29985200 |
| H | 1.96965200  | -2.45301300 | -2.77309700 |
| H | 0.39390400  | -0.64099200 | -3.42154600 |
| H | 1.41517800  | -1.13472500 | -4.78045300 |
| H | -0.26916300 | -1.66115600 | -4.70985900 |
| H | 1.81213600  | -4.74420900 | -3.75911500 |

|                                              |             |             |                             |
|----------------------------------------------|-------------|-------------|-----------------------------|
| H                                            | 0.61239900  | -4.16710900 | -4.92176900                 |
| H                                            | 2.25998900  | -3.53066500 | -4.96985000                 |
| C                                            | -0.47989800 | -3.80869700 | 1.46860500                  |
| C                                            | -0.44918100 | -5.28149700 | 1.92453000                  |
| C                                            | -1.50145500 | -2.99946900 | 2.28994300                  |
| H                                            | 0.50589300  | -3.38227400 | 1.67633100                  |
| H                                            | 0.30422400  | -5.85643200 | 1.37675400                  |
| H                                            | -0.21415900 | -5.34595500 | 2.99186700                  |
| H                                            | -1.41725600 | -5.76777800 | 1.76587200                  |
| H                                            | -1.51215900 | -1.94676300 | 1.98997300                  |
| H                                            | -2.51736000 | -3.39066500 | 2.17672200                  |
| H                                            | -1.24696900 | -3.04433200 | 3.35393200                  |
| C                                            | -4.80060600 | -1.69138200 | -0.02548600                 |
| C                                            | -4.34568000 | -0.57488600 | 0.56734100                  |
| H                                            | -4.64350200 | -1.79281400 | -1.09984900                 |
| H                                            | -4.47903300 | -0.40054900 | 1.63231500                  |
| C                                            | -5.51466200 | -2.81345400 | 0.59696800                  |
| C                                            | -5.72178200 | -2.91943900 | 1.98611900                  |
| C                                            | -6.01497300 | -3.83599400 | -0.22950000                 |
| C                                            | -6.40493400 | -4.00707800 | 2.52167400                  |
| H                                            | -5.34698900 | -2.14846400 | 2.65229000                  |
| C                                            | -6.70099700 | -4.92491000 | 0.30683200                  |
| H                                            | -5.87367500 | -3.76516500 | -1.30531900                 |
| C                                            | -6.89808000 | -5.01404300 | 1.68527400                  |
| H                                            | -6.55628800 | -4.07124100 | 3.59510200                  |
| H                                            | -7.08365500 | -5.69981400 | -0.35052400                 |
| H                                            | -7.43247000 | -5.85968300 | 2.10721900                  |
| C                                            | -3.65979300 | 0.51618600  | -0.18571200                 |
| H                                            | -4.15899700 | 1.47986900  | -0.05230900                 |
| H                                            | -3.59847900 | 0.29881800  | -1.25781700                 |
| O                                            | -2.32051700 | 0.74429000  | 0.35180100                  |
| H                                            | -1.73112900 | 0.00792300  | 0.10517700                  |
| Zero-point correction=                       |             |             | 0.953716 (Hartree/Particle) |
| Thermal correction to Energy=                |             |             | 1.012853                    |
| Thermal correction to Enthalpy=              |             |             | 1.013797                    |
| Thermal correction to Gibbs Free Energy=     |             |             | 0.847297                    |
| Sum of electronic and zero-point Energies=   |             |             | -2447.601851                |
| Sum of electronic and thermal Energies=      |             |             | -2447.542714                |
| Sum of electronic and thermal Enthalpies=    |             |             | -2447.541770                |
| Sum of electronic and thermal Free Energies= |             |             | -2447.708270                |

### 3-TS1'-1

|   |            |            |            |
|---|------------|------------|------------|
| C | 4.98989300 | 1.69882400 | 0.84940700 |
|---|------------|------------|------------|

|    |             |             |             |
|----|-------------|-------------|-------------|
| O  | 5.33586200  | 1.30586500  | 1.95876000  |
| C  | 5.95673700  | 2.02605000  | -0.23217700 |
| C  | 7.32821000  | 1.89067000  | 0.03768300  |
| C  | 5.53557600  | 2.46071400  | -1.49780200 |
| C  | 8.26409500  | 2.18624500  | -0.94790300 |
| H  | 7.63152000  | 1.55765100  | 1.02458100  |
| C  | 6.47601200  | 2.75445000  | -2.48363700 |
| C  | 7.83904400  | 2.61768200  | -2.20940900 |
| H  | 9.32440400  | 2.08452500  | -0.73768200 |
| H  | 6.14913500  | 3.09149000  | -3.46262100 |
| C  | 3.56789500  | 1.84935000  | 0.56880800  |
| C  | 2.35860500  | 1.91963000  | 0.43874000  |
| C  | 0.94913500  | 1.91441600  | 0.29723200  |
| C  | 0.25849500  | 3.00321900  | 0.31153300  |
| C  | -0.04023600 | 4.37572900  | 0.44415700  |
| C  | -0.04455200 | 4.96488000  | 1.73133800  |
| C  | -0.26988900 | 5.17911400  | -0.69901400 |
| C  | -0.25110300 | 6.33321100  | 1.86375300  |
| C  | -0.48711600 | 6.54181800  | -0.55036400 |
| H  | -0.27328400 | 4.71533600  | -1.67943700 |
| C  | -0.47508600 | 7.11752300  | 0.72732700  |
| H  | -0.24042800 | 6.79027200  | 2.84777300  |
| H  | -0.65965400 | 7.16236600  | -1.42364500 |
| H  | -0.64038600 | 8.18521000  | 0.83602000  |
| H  | 8.57134200  | 2.84907800  | -2.97736600 |
| H  | 4.47477400  | 2.56927700  | -1.70367000 |
| H  | 0.13183400  | 4.34137600  | 2.60157200  |
| Au | 0.36972600  | -0.10483900 | 0.09906700  |
| C  | 0.07614300  | -2.11216200 | -0.07733100 |
| C  | 0.52560900  | -4.32304100 | -0.02076400 |
| C  | -0.72248400 | -4.17230900 | -0.53567500 |
| H  | -1.44358700 | -4.89596800 | -0.87993200 |
| H  | 1.11409800  | -5.20519000 | 0.17356200  |
| N  | 1.00284500  | -3.04984600 | 0.25454200  |
| N  | -0.98368300 | -2.80806400 | -0.56320300 |
| C  | 2.31329100  | -2.76051300 | 0.80605600  |
| C  | 3.39115300  | -2.58095500 | -0.08419500 |
| C  | 2.44843200  | -2.66918200 | 2.20590700  |
| C  | 4.63871600  | -2.28143100 | 0.47630200  |
| C  | 3.71986700  | -2.36342800 | 2.70568900  |
| C  | 4.80211400  | -2.16418200 | 1.85365900  |
| H  | 5.49202000  | -2.13006600 | -0.17735000 |
| H  | 3.86264300  | -2.27281200 | 3.77767800  |
| H  | 5.77387300  | -1.91059200 | 2.26466300  |

|   |             |             |             |
|---|-------------|-------------|-------------|
| C | -2.22184200 | -2.22465800 | -1.03574500 |
| C | -3.28341000 | -2.08021000 | -0.11955100 |
| C | -2.31739800 | -1.84854400 | -2.39018300 |
| C | -4.46819700 | -1.50853500 | -0.59868200 |
| C | -3.52965400 | -1.28744000 | -2.81230500 |
| C | -4.59095000 | -1.11400200 | -1.92854600 |
| H | -5.30642900 | -1.36755400 | 0.07574000  |
| H | -3.64185200 | -0.98611300 | -3.84916800 |
| H | -5.52088200 | -0.67173600 | -2.27275900 |
| C | -3.18419300 | -2.51452400 | 1.34061200  |
| C | -4.28149100 | -3.53247100 | 1.70778400  |
| C | -3.21320300 | -1.30055600 | 2.28946100  |
| H | -2.22171500 | -3.01350700 | 1.48677800  |
| H | -4.25369700 | -4.40578900 | 1.04884100  |
| H | -4.14645600 | -3.87975200 | 2.73711900  |
| H | -5.28166400 | -3.09372300 | 1.63557900  |
| H | -2.38304000 | -0.61695900 | 2.08010700  |
| H | -4.14910900 | -0.74148200 | 2.18864800  |
| H | -3.12734600 | -1.62710500 | 3.33099400  |
| C | -1.18069000 | -2.03720200 | -3.39033300 |
| C | -0.68968100 | -0.68795700 | -3.95032300 |
| C | -1.58729100 | -2.99525000 | -4.52788000 |
| H | -0.33612200 | -2.49597900 | -2.86779000 |
| H | -0.35956400 | -0.02122000 | -3.14699500 |
| H | 0.15331100  | -0.84374500 | -4.63140000 |
| H | -1.47821500 | -0.17550600 | -4.51116900 |
| H | -1.90753000 | -3.96688300 | -4.13888400 |
| H | -2.41117100 | -2.58704400 | -5.12206600 |
| H | -0.74239300 | -3.16208900 | -5.20361300 |
| C | 1.28829200  | -2.88751800 | 3.17262100  |
| C | 0.99337800  | -1.61945900 | 3.99751500  |
| C | 1.54374300  | -4.09937500 | 4.09091300  |
| H | 0.38981000  | -3.10883000 | 2.58806000  |
| H | 0.77826000  | -0.76479400 | 3.34779000  |
| H | 0.12817100  | -1.78264400 | 4.64874200  |
| H | 1.84165500  | -1.34847000 | 4.63387400  |
| H | 1.71910400  | -5.01171400 | 3.51205100  |
| H | 2.41704700  | -3.93966000 | 4.73120100  |
| H | 0.68133800  | -4.27180200 | 4.74307400  |
| C | 3.25105500  | -2.69828100 | -1.59932900 |
| C | 4.07946700  | -3.87647700 | -2.14906900 |
| C | 3.62263300  | -1.38053100 | -2.30655400 |
| H | 2.20172200  | -2.90388800 | -1.83266700 |
| H | 3.79452100  | -4.82230700 | -1.67739600 |

|                                              |              |             |                             |
|----------------------------------------------|--------------|-------------|-----------------------------|
| H                                            | 3.92971100   | -3.97709400 | -3.22894700                 |
| H                                            | 5.14991100   | -3.72822400 | -1.97445000                 |
| H                                            | 3.01655500   | -0.54738100 | -1.93690600                 |
| H                                            | 4.67437100   | -1.12093800 | -2.14978100                 |
| H                                            | 3.46139700   | -1.47097200 | -3.38591800                 |
| C                                            | -5.18589400  | 1.97685800  | 0.82213300                  |
| C                                            | -4.22597700  | 2.53128000  | 0.06407800                  |
| H                                            | -4.96218900  | 1.80634800  | 1.87627600                  |
| H                                            | -4.37848800  | 2.72465900  | -0.99536000                 |
| C                                            | -6.53280600  | 1.56117500  | 0.40902600                  |
| C                                            | -7.35064200  | 0.89988500  | 1.34311000                  |
| C                                            | -7.04846300  | 1.78949700  | -0.88161800                 |
| C                                            | -8.63231300  | 0.46909100  | 1.00143000                  |
| H                                            | -6.97544300  | 0.72785800  | 2.34913900                  |
| C                                            | -8.32783700  | 1.36027300  | -1.22256100                 |
| H                                            | -6.45243800  | 2.31886000  | -1.61875500                 |
| C                                            | -9.12478100  | 0.69602900  | -0.28394700                 |
| H                                            | -9.24657700  | -0.03761200 | 1.73968000                  |
| H                                            | -8.71101100  | 1.55138800  | -2.22064200                 |
| H                                            | -10.12375200 | 0.36668100  | -0.55275900                 |
| C                                            | -2.89973900  | 2.95258200  | 0.61190400                  |
| H                                            | -2.80761700  | 2.69189300  | 1.67403300                  |
| H                                            | -2.75671100  | 4.03355400  | 0.51285600                  |
| O                                            | -1.80567500  | 2.38314300  | -0.14853500                 |
| H                                            | -1.81176400  | 1.41493300  | -0.05448900                 |
| Zero-point correction=                       |              |             | 0.952939 (Hartree/Particle) |
| Thermal correction to Energy=                |              |             | 1.012514                    |
| Thermal correction to Enthalpy=              |              |             | 1.013458                    |
| Thermal correction to Gibbs Free Energy=     |              |             | 0.845230                    |
| Sum of electronic and zero-point Energies=   |              |             | -2447.586373                |
| Sum of electronic and thermal Energies=      |              |             | -2447.526798                |
| Sum of electronic and thermal Enthalpies=    |              |             | -2447.525853                |
| Sum of electronic and thermal Free Energies= |              |             | -2447.694082                |

### 3-TS1'-3

|   |            |             |             |
|---|------------|-------------|-------------|
| C | 5.61151300 | -1.11547100 | -1.44447900 |
| O | 5.91276500 | -0.01744900 | -1.91507700 |
| C | 6.53839200 | -2.25584300 | -1.32096000 |
| C | 6.11097200 | -3.49670000 | -0.82178700 |
| C | 7.87430200 | -2.07957800 | -1.71920700 |
| C | 7.01328200 | -4.55213200 | -0.72010400 |
| H | 5.07578400 | -3.63363700 | -0.52096700 |
| C | 8.77107600 | -3.13670300 | -1.61534900 |

|    |             |             |             |
|----|-------------|-------------|-------------|
| C  | 8.34159000  | -4.37183300 | -1.11600900 |
| H  | 6.68501400  | -5.51301700 | -0.33679200 |
| H  | 9.80385700  | -3.00436800 | -1.92180500 |
| C  | 4.23965300  | -1.26101500 | -0.99023600 |
| C  | 3.06403600  | -1.20418900 | -0.63547300 |
| C  | 1.77494400  | -1.13498300 | -0.26675100 |
| C  | 0.63398500  | -1.52835800 | 0.22033200  |
| C  | 0.52737500  | -2.80690700 | 0.97078300  |
| C  | -0.69821900 | -3.49614700 | 1.03456700  |
| C  | 1.64444000  | -3.35288400 | 1.63647000  |
| C  | -0.79515200 | -4.70546100 | 1.71979700  |
| C  | 1.53590700  | -4.55061200 | 2.33554800  |
| H  | 2.58996400  | -2.82027500 | 1.62785800  |
| C  | 0.31789700  | -5.23550900 | 2.37427500  |
| H  | -1.74773000 | -5.22495400 | 1.75147900  |
| H  | 2.40201300  | -4.94956500 | 2.85481000  |
| H  | 0.23659900  | -6.17091100 | 2.91939900  |
| H  | 9.04440900  | -5.19584700 | -1.03691700 |
| H  | 8.18134300  | -1.11288500 | -2.10384600 |
| H  | -1.57137600 | -3.08719000 | 0.53771700  |
| Au | -1.10668400 | -0.38204000 | -0.03814300 |
| C  | -2.88013700 | 0.60226800  | -0.25849700 |
| C  | -4.46214400 | 2.15108100  | -0.72045100 |
| C  | -5.09569700 | 1.05414000  | -0.23184100 |
| H  | -6.14050900 | 0.85439800  | -0.05658200 |
| H  | -4.84207700 | 3.10157200  | -1.05875900 |
| N  | -3.10417800 | 1.85780700  | -0.73158400 |
| N  | -4.11287100 | 0.11347300  | 0.04530700  |
| C  | -2.08625300 | 2.77800400  | -1.19554600 |
| C  | -1.53069800 | 3.68659700  | -0.27297300 |
| C  | -1.72466800 | 2.74827100  | -2.55756500 |
| C  | -0.57247100 | 4.58595300  | -0.75836100 |
| C  | -0.75635200 | 3.66720600  | -2.98362200 |
| C  | -0.18740900 | 4.57820800  | -2.09646400 |
| H  | -0.12817800 | 5.30762200  | -0.07999900 |
| H  | -0.45892600 | 3.68156900  | -4.02777900 |
| H  | 0.55025600  | 5.29192400  | -2.45150700 |
| C  | -4.38506400 | -1.20756900 | 0.57670100  |
| C  | -4.64195200 | -2.25518400 | -0.33116400 |
| C  | -4.40672200 | -1.37878400 | 1.97532800  |
| C  | -4.92212400 | -3.51625100 | 0.21055000  |
| C  | -4.69553100 | -2.66170700 | 2.45742600  |
| C  | -4.95051500 | -3.71890200 | 1.58812500  |
| H  | -5.12767700 | -4.34727600 | -0.45692000 |

|   |             |             |             |
|---|-------------|-------------|-------------|
| H | -4.72409200 | -2.83240100 | 3.52893800  |
| H | -5.18037700 | -4.70310900 | 1.98581600  |
| C | -4.63511500 | -2.06691700 | -1.84573800 |
| C | -6.02682200 | -2.33584000 | -2.45205800 |
| C | -3.55754600 | -2.93858000 | -2.51940600 |
| H | -4.38377100 | -1.02382200 | -2.05960600 |
| H | -6.79140400 | -1.69388300 | -2.00334600 |
| H | -6.01486800 | -2.14636900 | -3.53016300 |
| H | -6.33628700 | -3.37504900 | -2.30169500 |
| H | -2.56210500 | -2.71742400 | -2.12076800 |
| H | -3.75080500 | -4.00574100 | -2.37002600 |
| H | -3.54148300 | -2.75488100 | -3.59868100 |
| C | -4.13945400 | -0.24327800 | 2.95867100  |
| C | -2.90497900 | -0.53354400 | 3.83485100  |
| C | -5.37951600 | 0.05297000  | 3.82543100  |
| H | -3.92115100 | 0.66236800  | 2.38488100  |
| H | -2.01498200 | -0.71191100 | 3.22283200  |
| H | -2.70165200 | 0.31581900  | 4.49516400  |
| H | -3.05887400 | -1.41370100 | 4.46747800  |
| H | -6.25229200 | 0.29379100  | 3.21023000  |
| H | -5.64290900 | -0.80307600 | 4.45486500  |
| H | -5.18572700 | 0.90327900  | 4.48703100  |
| C | -2.34755700 | 1.78530200  | -3.56511300 |
| C | -1.30473800 | 0.79640500  | -4.12271100 |
| C | -3.05533000 | 2.54178500  | -4.70684900 |
| H | -3.10838200 | 1.19250500  | -3.04914900 |
| H | -0.87746400 | 0.18028400  | -3.32236800 |
| H | -1.76782100 | 0.11764700  | -4.84587900 |
| H | -0.48916200 | 1.31787000  | -4.63509900 |
| H | -3.80985100 | 3.23373500  | -4.32040100 |
| H | -2.34771000 | 3.12288500  | -5.30678500 |
| H | -3.55486200 | 1.83537400  | -5.37739900 |
| C | -1.93594700 | 3.73131000  | 1.19711800  |
| C | -2.62416900 | 5.06533900  | 1.54845000  |
| C | -0.73499600 | 3.46357400  | 2.12489900  |
| H | -2.66267000 | 2.93339700  | 1.37567700  |
| H | -3.50380300 | 5.24122200  | 0.92122200  |
| H | -2.94862400 | 5.06131400  | 2.59385100  |
| H | -1.94602700 | 5.91432600  | 1.41451500  |
| H | -0.25705800 | 2.50690900  | 1.89171300  |
| H | 0.02103300  | 4.25162800  | 2.03938800  |
| H | -1.06242000 | 3.43637500  | 3.16921300  |
| C | 4.25014400  | 2.40766400  | 0.24192100  |
| C | 2.97178200  | 2.42090400  | -0.17225500 |



|                                              |            |            |                             |
|----------------------------------------------|------------|------------|-----------------------------|
| H                                            | 4.96803600 | 1.85002800 | -0.35982200                 |
| H                                            | 2.19926300 | 2.96540600 | 0.36550900                  |
| C                                            | 4.82006200 | 3.07849100 | 1.41696000                  |
| C                                            | 6.20783800 | 2.99523900 | 1.62807500                  |
| C                                            | 4.04780000 | 3.79885800 | 2.34793600                  |
| C                                            | 6.80739300 | 3.61135500 | 2.72544400                  |
| H                                            | 6.81814600 | 2.44300300 | 0.91792300                  |
| C                                            | 4.64507100 | 4.41209300 | 3.44445100                  |
| H                                            | 2.97251800 | 3.87575600 | 2.21683600                  |
| C                                            | 6.02761700 | 4.32235900 | 3.63799900                  |
| H                                            | 7.88144700 | 3.53673900 | 2.86705700                  |
| H                                            | 4.03349100 | 4.96290700 | 4.15321000                  |
| H                                            | 6.49033900 | 4.80364300 | 4.49432100                  |
| C                                            | 2.53083200 | 1.74468700 | -1.42437800                 |
| H                                            | 3.35561000 | 1.19294600 | -1.89095200                 |
| H                                            | 2.13334900 | 2.46480800 | -2.15165800                 |
| O                                            | 1.42918400 | 0.83093500 | -1.12120300                 |
| H                                            | 0.96065900 | 0.62743800 | -1.94630200                 |
| Zero-point correction=                       |            |            | 0.953023 (Hartree/Particle) |
| Thermal correction to Energy=                |            |            | 1.012125                    |
| Thermal correction to Enthalpy=              |            |            | 1.013069                    |
| Thermal correction to Gibbs Free Energy=     |            |            | 0.847521                    |
| Sum of electronic and zero-point Energies=   |            |            | -2447.586404                |
| Sum of electronic and thermal Energies=      |            |            | -2447.527301                |
| Sum of electronic and thermal Enthalpies=    |            |            | -2447.526357                |
| Sum of electronic and thermal Free Energies= |            |            | -2447.691905                |

### 3-TS1'-2

|   |             |             |             |
|---|-------------|-------------|-------------|
| C | -1.62779200 | 4.29358000  | 0.88832800  |
| O | -0.74429300 | 4.38480300  | 1.73663700  |
| C | -2.61055100 | 5.36414100  | 0.60444300  |
| C | -2.61544700 | 6.49993300  | 1.43129700  |
| C | -3.51874000 | 5.27139500  | -0.46214300 |
| C | -3.52443600 | 7.52527200  | 1.19549100  |
| H | -1.90288700 | 6.55275100  | 2.24741700  |
| C | -4.42473900 | 6.30295700  | -0.69706000 |
| C | -4.42950600 | 7.42748700  | 0.13247000  |
| H | -3.53165800 | 8.40172300  | 1.83585600  |
| H | -5.12281600 | 6.23508800  | -1.52557000 |
| C | -1.71920400 | 3.05414400  | 0.12481700  |
| C | -1.68449800 | 1.96723200  | -0.43374300 |
| C | -1.69318300 | 0.75302200  | -1.07184000 |
| C | -1.03137000 | -0.34275600 | -1.33461500 |

|    |             |             |             |
|----|-------------|-------------|-------------|
| C  | -1.40522600 | -1.46597100 | -2.20813200 |
| C  | -1.33840100 | -2.78767300 | -1.73145200 |
| C  | -1.81478700 | -1.24170700 | -3.53911300 |
| C  | -1.71283100 | -3.85095900 | -2.55016600 |
| C  | -2.16551800 | -2.31538000 | -4.35938000 |
| H  | -1.81185800 | -0.23133900 | -3.93941500 |
| C  | -2.12549300 | -3.62019400 | -3.86517900 |
| H  | -1.67279700 | -4.86469500 | -2.16353900 |
| H  | -2.46463800 | -2.12929200 | -5.38643500 |
| H  | -2.40314300 | -4.45314300 | -4.50333900 |
| H  | -5.13717400 | 8.23058000  | -0.05047200 |
| H  | -3.50231900 | 4.40212000  | -1.11358700 |
| H  | -1.00560300 | -2.96950500 | -0.71433700 |
| Au | 0.83123800  | -0.34143500 | -0.36506800 |
| C  | 2.65924100  | -0.38618000 | 0.53828900  |
| C  | 4.30477800  | -0.70455700 | 2.05372800  |
| C  | 4.84152100  | -0.03220200 | 1.00330700  |
| H  | 5.84139900  | 0.32841300  | 0.82384500  |
| H  | 4.74122500  | -1.04915700 | 2.97723500  |
| N  | 2.96623300  | -0.91741100 | 1.75182000  |
| N  | 3.82016900  | 0.15409000  | 0.08134300  |
| C  | 2.04951700  | -1.63244700 | 2.61683900  |
| C  | 1.27206300  | -0.89695400 | 3.53345500  |
| C  | 2.00335300  | -3.03835200 | 2.52338600  |
| C  | 0.42083100  | -1.62368100 | 4.37558800  |
| C  | 1.13056000  | -3.70902300 | 3.38892100  |
| C  | 0.34844100  | -3.01188900 | 4.30580200  |
| H  | -0.19005700 | -1.09225600 | 5.09858800  |
| H  | 1.06896700  | -4.79211800 | 3.34826500  |
| H  | -0.31614600 | -3.55352300 | 4.97256000  |
| C  | 4.00035600  | 0.82506100  | -1.19118300 |
| C  | 4.36985700  | 0.05206700  | -2.31030000 |
| C  | 3.84081200  | 2.22408900  | -1.24226500 |
| C  | 4.57581200  | 0.73178200  | -3.51705300 |
| C  | 4.06332600  | 2.84800200  | -2.47617900 |
| C  | 4.42609300  | 2.11322400  | -3.60120400 |
| H  | 4.86354500  | 0.17112600  | -4.40088500 |
| H  | 3.95235900  | 3.92490700  | -2.55380700 |
| H  | 4.59649300  | 2.61945400  | -4.54677200 |
| C  | 4.56827200  | -1.45963200 | -2.25087700 |
| C  | 6.04115300  | -1.83991500 | -2.50196400 |
| C  | 3.63137200  | -2.19741100 | -3.22657000 |
| H  | 4.31302800  | -1.79921400 | -1.24262000 |
| H  | 6.70988300  | -1.35108300 | -1.78639400 |

|   |             |             |             |
|---|-------------|-------------|-------------|
| H | 6.17661600  | -2.92229500 | -2.40806000 |
| H | 6.36345300  | -1.55080400 | -3.50758600 |
| H | 2.58240100  | -1.95181500 | -3.03338400 |
| H | 3.85004200  | -1.94081400 | -4.26813400 |
| H | 3.75401600  | -3.28048300 | -3.12195500 |
| C | 3.44860500  | 3.06248500  | -0.02989200 |
| C | 2.15660900  | 3.86006800  | -0.28920800 |
| C | 4.59873900  | 3.99219200  | 0.40522300  |
| H | 3.24376300  | 2.38506800  | 0.80445600  |
| H | 1.34835300  | 3.20067400  | -0.61979000 |
| H | 1.82639200  | 4.36256500  | 0.62444200  |
| H | 2.30361900  | 4.62506100  | -1.05914300 |
| H | 5.50670300  | 3.42746700  | 0.64052500  |
| H | 4.84969900  | 4.71063900  | -0.38202600 |
| H | 4.31213300  | 4.56053500  | 1.29587000  |
| C | 2.86120000  | -3.83801800 | 1.54619200  |
| C | 1.99778100  | -4.65252700 | 0.56405400  |
| C | 3.85853800  | -4.74692200 | 2.29212000  |
| H | 3.44814300  | -3.13429100 | 0.94868600  |
| H | 1.32620200  | -4.00272100 | -0.00604400 |
| H | 2.63581000  | -5.18825300 | -0.14643700 |
| H | 1.38724400  | -5.39691400 | 1.08557300  |
| H | 4.50378500  | -4.16987600 | 2.96204200  |
| H | 3.34079000  | -5.49802500 | 2.89737300  |
| H | 4.49822200  | -5.27725600 | 1.57937400  |
| C | 1.32494700  | 0.62379800  | 3.64053600  |
| C | 1.90703200  | 1.07208100  | 4.99569400  |
| C | -0.05835300 | 1.25452100  | 3.39129800  |
| H | 1.99343400  | 0.99850000  | 2.86008200  |
| H | 2.91237100  | 0.66906000  | 5.15520900  |
| H | 1.96791400  | 2.16417700  | 5.03909700  |
| H | 1.27997900  | 0.74026200  | 5.82981700  |
| H | -0.48130300 | 0.90742700  | 2.44322800  |
| H | -0.76459800 | 1.00040900  | 4.18915100  |
| H | 0.01738300  | 2.34435700  | 3.34136100  |
| C | -6.05606200 | -1.01542300 | -0.67442500 |
| C | -4.94484200 | -0.31976400 | -0.36914400 |
| H | -6.68947100 | -0.62464300 | -1.47251300 |
| H | -4.27025200 | -0.64845400 | 0.41818900  |
| C | -6.54971300 | -2.25029500 | -0.05817000 |
| C | -7.70381700 | -2.85046400 | -0.59270100 |
| C | -5.92701800 | -2.86308200 | 1.04618900  |
| C | -8.21796100 | -4.02694700 | -0.05101600 |
| H | -8.19977300 | -2.38644800 | -1.44148300 |

|                                              |             |             |                             |
|----------------------------------------------|-------------|-------------|-----------------------------|
| C                                            | -6.44103100 | -4.03654800 | 1.58757700                  |
| H                                            | -5.04330000 | -2.41566300 | 1.49113500                  |
| C                                            | -7.58727800 | -4.62384000 | 1.04104300                  |
| H                                            | -9.11021300 | -4.47425000 | -0.47814400                 |
| H                                            | -5.95223500 | -4.49459600 | 2.44226800                  |
| H                                            | -7.98693000 | -5.53809800 | 1.46912700                  |
| C                                            | -4.58679000 | 0.94328900  | -1.07105800                 |
| H                                            | -4.31912300 | 1.75338100  | -0.38854500                 |
| H                                            | -5.39024800 | 1.28886900  | -1.72832800                 |
| O                                            | -3.39317500 | 0.79980100  | -1.93303800                 |
| H                                            | -3.43706200 | -0.07046700 | -2.37290600                 |
| Zero-point correction=                       |             |             | 0.953925 (Hartree/Particle) |
| Thermal correction to Energy=                |             |             | 1.012906                    |
| Thermal correction to Enthalpy=              |             |             | 1.013850                    |
| Thermal correction to Gibbs Free Energy=     |             |             | 0.847898                    |
| Sum of electronic and zero-point Energies=   |             |             | -2447.594638                |
| Sum of electronic and thermal Energies=      |             |             | -2447.535658                |
| Sum of electronic and thermal Enthalpies=    |             |             | -2447.534714                |
| Sum of electronic and thermal Free Energies= |             |             | -2447.700665                |

### 3-TS1-3

|   |            |             |             |
|---|------------|-------------|-------------|
| C | 2.63061000 | -0.73367500 | -2.48510000 |
| O | 2.10323200 | -1.49761000 | -3.28057700 |
| C | 3.91718800 | -0.03312400 | -2.72343300 |
| C | 4.41126000 | 0.00589000  | -4.03851200 |
| C | 4.64499200 | 0.56204100  | -1.68001000 |
| C | 5.61955000 | 0.64029900  | -4.30408100 |
| H | 3.83592700 | -0.46686500 | -4.82723300 |
| C | 5.85745100 | 1.19245300  | -1.95334300 |
| C | 6.34202300 | 1.23468200  | -3.26290700 |
| H | 6.00290000 | 0.67253100  | -5.31913500 |
| H | 6.42918700 | 1.63885700  | -1.14577800 |
| C | 1.95260800 | -0.35921600 | -1.23272800 |
| C | 1.29016500 | 0.53213600  | -0.57594100 |
| C | 1.52835100 | 1.87200400  | -0.28499100 |
| C | 1.69785200 | 3.04655900  | 0.00362800  |
| C | 1.94696800 | 4.41094700  | 0.30918000  |
| C | 3.15130100 | 5.02004700  | -0.10394700 |
| C | 0.99815500 | 5.17030800  | 1.02614900  |
| C | 3.39700900 | 6.35546400  | 0.19737500  |
| C | 1.25406400 | 6.50576000  | 1.32003800  |
| H | 0.07071200 | 4.70153600  | 1.33943200  |
| C | 2.45098500 | 7.09971500  | 0.90846400  |

|    |             |             |             |
|----|-------------|-------------|-------------|
| H  | 4.32499200  | 6.81908900  | -0.12244800 |
| H  | 0.52198600  | 7.08726900  | 1.87201000  |
| H  | 2.64616000  | 8.14213700  | 1.14128600  |
| H  | 7.28731100  | 1.72598600  | -3.47361000 |
| H  | 4.28162500  | 0.50525800  | -0.65855100 |
| H  | 3.87712100  | 4.43375000  | -0.65800100 |
| Au | -0.71970200 | -0.04554900 | -0.14543400 |
| C  | -2.69211700 | -0.45954500 | 0.08625900  |
| C  | -4.66618900 | -1.55463700 | 0.06675100  |
| C  | -4.92513600 | -0.24535200 | 0.31980300  |
| H  | -5.85268900 | 0.27577000  | 0.49378800  |
| H  | -5.32238800 | -2.40550300 | -0.02006700 |
| N  | -3.28914700 | -1.67104700 | -0.07289200 |
| N  | -3.70260300 | 0.41378500  | 0.32753300  |
| C  | -2.57962200 | -2.91094300 | -0.31422800 |
| C  | -2.18120200 | -3.21676200 | -1.63590300 |
| C  | -2.31702400 | -3.75308000 | 0.78420500  |
| C  | -1.46443200 | -4.40631700 | -1.82437500 |
| C  | -1.61154500 | -4.93822800 | 0.52855200  |
| C  | -1.18193900 | -5.25777800 | -0.75568600 |
| H  | -1.13811900 | -4.67836300 | -2.82200800 |
| H  | -1.39702100 | -5.61639100 | 1.34849400  |
| H  | -0.63397900 | -6.17881600 | -0.93077400 |
| C  | -3.54367200 | 1.83617000  | 0.56290600  |
| C  | -3.36189400 | 2.27855300  | 1.88852100  |
| C  | -3.59917600 | 2.71024900  | -0.54127200 |
| C  | -3.22724700 | 3.65834400  | 2.08808500  |
| C  | -3.45720400 | 4.07836200  | -0.27883400 |
| C  | -3.27413400 | 4.54909900  | 1.01868200  |
| H  | -3.09168600 | 4.03804700  | 3.09600600  |
| H  | -3.49503600 | 4.78393300  | -1.10255700 |
| H  | -3.17603000 | 5.61579900  | 1.19766000  |
| C  | -3.31424200 | 1.33285400  | 3.08483100  |
| C  | -4.47794700 | 1.59979300  | 4.06033300  |
| C  | -1.95523700 | 1.40610200  | 3.80835600  |
| H  | -3.42780600 | 0.30839100  | 2.71753400  |
| H  | -5.44849200 | 1.51282300  | 3.56174900  |
| H  | -4.45461900 | 0.88082900  | 4.88548400  |
| H  | -4.41612800 | 2.60320300  | 4.49350500  |
| H  | -1.12874100 | 1.18029100  | 3.12667300  |
| H  | -1.77839600 | 2.40009800  | 4.23175900  |
| H  | -1.92531800 | 0.68623800  | 4.63280800  |
| C  | -3.81267500 | 2.23331900  | -1.97493600 |
| C  | -2.61729300 | 2.59934000  | -2.87632000 |

|   |             |             |             |
|---|-------------|-------------|-------------|
| C | -5.13355800 | 2.77641200  | -2.55563200 |
| H | -3.88802500 | 1.14172700  | -1.96610700 |
| H | -1.68228000 | 2.18441800  | -2.48625800 |
| H | -2.77086900 | 2.20657800  | -3.88660900 |
| H | -2.49318800 | 3.68386700  | -2.95902300 |
| H | -5.99156300 | 2.49179800  | -1.93839100 |
| H | -5.12209700 | 3.86885000  | -2.62467200 |
| H | -5.29545900 | 2.38244000  | -3.56401400 |
| C | -2.76586700 | -3.43472000 | 2.20827700  |
| C | -1.56583800 | -3.27191600 | 3.16101100  |
| C | -3.75233800 | -4.49634100 | 2.73477800  |
| H | -3.29657200 | -2.47835500 | 2.19595200  |
| H | -0.88979700 | -2.48261100 | 2.81763400  |
| H | -1.91325100 | -3.00667900 | 4.16458800  |
| H | -0.98921700 | -4.19861500 | 3.24701600  |
| H | -4.62474700 | -4.59474100 | 2.08115900  |
| H | -3.28177600 | -5.48186500 | 2.80984500  |
| H | -4.10603800 | -4.22165200 | 3.73342300  |
| C | -2.56925500 | -2.34869500 | -2.83111900 |
| C | -3.89427000 | -2.85555300 | -3.44235700 |
| C | -1.47596900 | -2.26041400 | -3.91060900 |
| H | -2.74170000 | -1.33153500 | -2.46611500 |
| H | -4.70660200 | -2.86089000 | -2.70881200 |
| H | -4.19769000 | -2.21546200 | -4.27693000 |
| H | -3.78169200 | -3.87578000 | -3.82383100 |
| H | -0.50794500 | -1.94866800 | -3.50675900 |
| H | -1.33222900 | -3.21444100 | -4.42802500 |
| H | -1.77251800 | -1.53049600 | -4.67007600 |
| C | 3.60124700  | -2.00066200 | 1.91438400  |
| C | 3.01947500  | -2.74029200 | 0.95587400  |
| H | 2.98023200  | -1.27005500 | 2.43499200  |
| H | 3.58177300  | -3.47895100 | 0.38900100  |
| C | 4.99640100  | -2.04957300 | 2.36953300  |
| C | 5.93883300  | -2.96861500 | 1.86994200  |
| C | 5.41586100  | -1.13525300 | 3.35218200  |
| C | 7.25027000  | -2.96428700 | 2.33411200  |
| H | 5.64500500  | -3.69552300 | 1.11897300  |
| C | 6.72950500  | -1.13120200 | 3.81835000  |
| H | 4.69971400  | -0.42206900 | 3.75330500  |
| C | 7.65211300  | -2.04598000 | 3.30975400  |
| H | 7.96282400  | -3.68194200 | 1.93838600  |
| H | 7.03099600  | -0.41720900 | 4.57897800  |
| H | 8.67575700  | -2.04867200 | 3.67181100  |
| C | 1.56975400  | -2.63603400 | 0.61849200  |

|                                              |            |             |                             |
|----------------------------------------------|------------|-------------|-----------------------------|
| H                                            | 1.07834500 | -1.85016400 | 1.20868100                  |
| H                                            | 1.04084400 | -3.57970700 | 0.80030100                  |
| O                                            | 1.43154100 | -2.34695200 | -0.79724600                 |
| H                                            | 0.53699400 | -2.57599500 | -1.10231600                 |
| Zero-point correction=                       |            |             | 0.952972 (Hartree/Particle) |
| Thermal correction to Energy=                |            |             | 1.012197                    |
| Thermal correction to Enthalpy=              |            |             | 1.013141                    |
| Thermal correction to Gibbs Free Energy=     |            |             | 0.846960                    |
| Sum of electronic and zero-point Energies=   |            |             | -2447.578164                |
| Sum of electronic and thermal Energies=      |            |             | -2447.518940                |
| Sum of electronic and thermal Enthalpies=    |            |             | -2447.517996                |
| Sum of electronic and thermal Free Energies= |            |             | -2447.684177                |

#### 9-TS1

|    |             |             |            |
|----|-------------|-------------|------------|
| C  | 1.28443800  | 0.78384000  | 1.17655200 |
| O  | 1.44275100  | 1.58905000  | 0.25685600 |
| C  | 2.30854300  | 0.49525200  | 2.20135500 |
| C  | 3.35733000  | 1.42042900  | 2.36399700 |
| C  | 2.27946300  | -0.66763100 | 2.99241400 |
| C  | 4.35755800  | 1.17742400  | 3.30022500 |
| H  | 3.36920400  | 2.33403200  | 1.77880800 |
| C  | 3.28963500  | -0.90729500 | 3.91919000 |
| C  | 4.32870300  | 0.01455000  | 4.07486600 |
| H  | 5.16087000  | 1.89646200  | 3.42479500 |
| H  | 3.26804400  | -1.81072900 | 4.52061500 |
| C  | -0.03998500 | 0.07912200  | 1.12566000 |
| C  | -1.18635400 | 0.78856200  | 1.78000300 |
| C  | -1.06590300 | 2.21812700  | 2.01066700 |
| C  | -0.96039400 | 3.41559600  | 2.17872700 |
| C  | -0.86173600 | 4.82442200  | 2.38595400 |
| C  | -1.89214800 | 5.50512700  | 3.06563700 |
| C  | 0.25828600  | 5.53829700  | 1.91490900 |
| C  | -1.80294300 | 6.87886900  | 3.26857700 |
| C  | 0.33203600  | 6.91329000  | 2.12670100 |
| H  | 1.05994800  | 5.02144300  | 1.39448100 |
| C  | -0.69178400 | 7.58494700  | 2.79928600 |
| H  | -2.59741800 | 7.39872200  | 3.79513100 |
| H  | 1.19641800  | 7.46217800  | 1.76561300 |
| H  | -0.62382300 | 8.65667700  | 2.96063900 |
| H  | 5.11365300  | -0.17255900 | 4.80171800 |
| H  | 1.47724700  | -1.38578000 | 2.87308800 |
| H  | -2.74823700 | 4.94882300  | 3.43441800 |
| Au | -0.22965900 | -1.78279200 | 0.33566100 |

|   |             |             |             |
|---|-------------|-------------|-------------|
| C | -0.47232600 | -3.67329800 | -0.41934200 |
| C | -0.23374300 | -5.59635800 | -1.58027200 |
| C | -1.33623600 | -5.72781400 | -0.79701600 |
| H | -2.03095100 | -6.54345700 | -0.67706300 |
| H | 0.22499000  | -6.27359900 | -2.28248800 |
| N | 0.28365400  | -4.33155500 | -1.33690700 |
| N | -1.46892700 | -4.53953200 | -0.09228400 |
| C | 1.45272600  | -3.78585400 | -1.99830600 |
| C | 1.27362200  | -3.10540900 | -3.21956000 |
| C | 2.71416100  | -3.97582300 | -1.39995200 |
| C | 2.41961700  | -2.58167600 | -3.83111000 |
| C | 3.82269400  | -3.43076800 | -2.05960700 |
| C | 3.67870400  | -2.73671000 | -3.25770000 |
| H | 2.32358300  | -2.05327800 | -4.77443200 |
| H | 4.81152200  | -3.55673400 | -1.63003400 |
| H | 4.55307200  | -2.32458000 | -3.75281100 |
| C | -2.53460200 | -4.25641400 | 0.84780400  |
| C | -2.35199700 | -4.61245600 | 2.19950900  |
| C | -3.71093500 | -3.64868900 | 0.36481900  |
| C | -3.39919600 | -4.32629500 | 3.08447000  |
| C | -4.72542400 | -3.39207200 | 1.29639800  |
| C | -4.57318300 | -3.72288700 | 2.64027600  |
| H | -3.29691400 | -4.58968600 | 4.13267500  |
| H | -5.65066700 | -2.93489300 | 0.95964500  |
| H | -5.37634000 | -3.52014700 | 3.34280700  |
| C | -1.08810500 | -5.29306600 | 2.71769400  |
| C | -1.39605600 | -6.69423900 | 3.28210100  |
| C | -0.36376900 | -4.42196100 | 3.76221500  |
| H | -0.40015400 | -5.42452500 | 1.87757600  |
| H | -1.87921000 | -7.32983500 | 2.53351600  |
| H | -0.47238500 | -7.18775900 | 3.60083900  |
| H | -2.06064200 | -6.64031200 | 4.15022700  |
| H | -0.09260800 | -3.44746800 | 3.34146700  |
| H | -0.98613700 | -4.24916900 | 4.64627000  |
| H | 0.55571400  | -4.91363300 | 4.09599300  |
| C | -3.92228400 | -3.29013100 | -1.10326900 |
| C | -4.18714200 | -1.78428700 | -1.29640500 |
| C | -5.05076700 | -4.13949100 | -1.72233000 |
| H | -3.00351700 | -3.52550200 | -1.64821400 |
| H | -3.37295500 | -1.17270900 | -0.89719600 |
| H | -4.29210600 | -1.55908600 | -2.36288800 |
| H | -5.11681500 | -1.47571500 | -0.80598600 |
| H | -4.84638400 | -5.21095800 | -1.62916200 |
| H | -6.01259500 | -3.94226900 | -1.23761000 |



|    |             |             |             |
|----|-------------|-------------|-------------|
| H  | -5.16116300 | -3.90653400 | -2.78626800 |
| C  | 2.91173200  | -4.75956400 | -0.10599400 |
| C  | 3.60002700  | -3.91106200 | 0.97922400  |
| C  | 3.68873900  | -6.06647500 | -0.36360100 |
| H  | 1.92619300  | -5.03742000 | 0.27975100  |
| H  | 3.04393000  | -2.99036500 | 1.17848300  |
| H  | 3.67049200  | -4.47831100 | 1.91333600  |
| H  | 4.61761500  | -3.63074200 | 0.68888400  |
| H  | 3.18179500  | -6.69774100 | -1.10033500 |
| H  | 4.69675100  | -5.86292100 | -0.73912900 |
| H  | 3.78812500  | -6.64058900 | 0.56334100  |
| C  | -0.08354300 | -2.95605200 | -3.90185800 |
| C  | -0.11374800 | -3.72608500 | -5.23797400 |
| C  | -0.47359900 | -1.47916500 | -4.10159700 |
| H  | -0.84464900 | -3.40200900 | -3.25475100 |
| H  | 0.13004400  | -4.78434100 | -5.09934200 |
| H  | -1.10875800 | -3.66335800 | -5.69032900 |
| H  | 0.60332800  | -3.31244100 | -5.95446800 |
| H  | -0.53756200 | -0.94833100 | -3.14661600 |
| H  | 0.24584700  | -0.95842500 | -4.74295700 |
| H  | -1.45115800 | -1.41571400 | -4.59156700 |
| O  | -0.77553200 | 0.07036000  | 3.01830200  |
| C  | 0.34554000  | 2.07375200  | -2.58176100 |
| C  | 0.48552800  | 3.27789900  | -3.25340800 |
| C  | -0.51845900 | 4.24485400  | -3.23544400 |
| C  | -1.66947000 | 3.93959000  | -2.50889700 |
| C  | -1.80590100 | 2.73199300  | -1.84173200 |
| H  | -0.41154700 | 5.18508600  | -3.76035900 |
| H  | 1.09080400  | 1.29402000  | -2.55404600 |
| H  | -2.67380900 | 2.43589400  | -1.26981400 |
| Cl | -2.98072500 | 5.08022400  | -2.43285600 |
| Cl | 1.95858100  | 3.56466200  | -4.13906000 |
| N  | -0.80016900 | 1.80823700  | -1.88839300 |
| O  | -0.94476300 | 0.67731600  | -1.28495000 |
| C  | -5.47296400 | 1.83788300  | 0.70942300  |
| C  | -4.26069400 | 1.97079900  | 1.27349700  |
| H  | -5.95553000 | 0.86128000  | 0.77110500  |
| H  | -3.72155800 | 2.91327100  | 1.23002600  |
| C  | -6.25410900 | 2.86323800  | 0.00453100  |
| C  | -5.91183100 | 4.22882200  | 0.01162500  |
| C  | -7.40316800 | 2.46922700  | -0.70341200 |
| C  | -6.68473600 | 5.15815600  | -0.67843700 |
| H  | -5.04715000 | 4.56931500  | 0.57309400  |
| C  | -8.17587900 | 3.39926000  | -1.39665600 |

|                                              |             |             |                             |
|----------------------------------------------|-------------|-------------|-----------------------------|
| H                                            | -7.68767900 | 1.41990600  | -0.71103800                 |
| C                                            | -7.81801500 | 4.74790300  | -1.38779800                 |
| H                                            | -6.41030500 | 6.20880500  | -0.65520600                 |
| H                                            | -9.05814600 | 3.07224200  | -1.93870900                 |
| H                                            | -8.42088700 | 5.47675800  | -1.92094600                 |
| C                                            | -3.59784800 | 0.86182800  | 2.02624500                  |
| H                                            | -4.26063000 | -0.00293000 | 2.10921800                  |
| H                                            | -3.30915200 | 1.17650400  | 3.03552300                  |
| O                                            | -2.41093200 | 0.34207200  | 1.34101600                  |
| H                                            | -1.22160900 | -0.79461900 | 2.96059000                  |
| C                                            | 6.31231300  | 3.71237700  | -0.12919200                 |
| C                                            | 5.06865700  | 3.44222100  | -0.55447200                 |
| H                                            | 6.50887800  | 4.71781100  | 0.24530900                  |
| H                                            | 4.81529500  | 2.45044300  | -0.92982200                 |
| C                                            | 7.47451300  | 2.81185300  | -0.09892400                 |
| C                                            | 8.67276100  | 3.27461100  | 0.47300900                  |
| C                                            | 7.45196900  | 1.50273300  | -0.61613700                 |
| C                                            | 9.80465600  | 2.46303100  | 0.53560400                  |
| H                                            | 8.71225800  | 4.28493300  | 0.87263300                  |
| C                                            | 8.58104500  | 0.69164700  | -0.55410900                 |
| H                                            | 6.54693600  | 1.11905500  | -1.07767200                 |
| C                                            | 9.76336400  | 1.16636900  | 0.02256400                  |
| H                                            | 10.71826800 | 2.84455000  | 0.98204100                  |
| H                                            | 8.54372000  | -0.31460100 | -0.96221500                 |
| H                                            | 10.64364400 | 0.53197500  | 0.06576100                  |
| C                                            | 3.95185000  | 4.44675000  | -0.55095600                 |
| H                                            | 3.56806400  | 4.59005300  | -1.57348800                 |
| H                                            | 4.31820300  | 5.41638000  | -0.20068800                 |
| O                                            | 2.87760700  | 4.09031400  | 0.32831700                  |
| H                                            | 2.48586200  | 3.24999000  | 0.03940100                  |
| Zero-point correction=                       |             |             | 1.202351 (Hartree/Particle) |
| Thermal correction to Energy=                |             |             | 1.282161                    |
| Thermal correction to Enthalpy=              |             |             | 1.283106                    |
| Thermal correction to Gibbs Free Energy=     |             |             | 1.066188                    |
| Sum of electronic and zero-point Energies=   |             |             | -4189.386178                |
| Sum of electronic and thermal Energies=      |             |             | -4189.306367                |
| Sum of electronic and thermal Enthalpies=    |             |             | -4189.305423                |
| Sum of electronic and thermal Free Energies= |             |             | -4189.522341                |
| 10-TS1                                       |             |             |                             |
| C                                            | 1.95682500  | 3.37051900  | 0.09880500                  |
| O                                            | 1.14158400  | 4.28664400  | -0.33442400                 |
| C                                            | 3.39152500  | 3.67210600  | -0.07947200                 |

|   |             |             |             |
|---|-------------|-------------|-------------|
| C | 3.79837000  | 5.01637200  | 0.01933800  |
| C | 4.34435000  | 2.68394400  | -0.38554100 |
| C | 5.13674300  | 5.35667100  | -0.14742700 |
| H | 3.06111700  | 5.77926300  | 0.24326600  |
| C | 5.67963300  | 3.03406200  | -0.56603800 |
| C | 6.07917900  | 4.36689200  | -0.43873800 |
| H | 5.44542400  | 6.39292100  | -0.05242400 |
| H | 6.40634900  | 2.26483400  | -0.80800100 |
| C | 1.43038500  | 2.12648300  | 0.55682800  |
| C | 2.31457900  | 1.08499900  | 1.17369200  |
| C | 0.06077400  | 1.93755300  | 0.34684500  |
| C | -0.74035300 | 2.96129300  | -0.04437300 |
| C | -1.83793900 | 3.66979400  | 0.53881800  |
| C | -2.48968200 | 4.67338300  | -0.21675500 |
| C | -2.24079600 | 3.44525200  | 1.88050400  |
| C | -3.50873500 | 5.42932400  | 0.34909000  |
| C | -3.25508000 | 4.20723800  | 2.44026300  |
| H | -1.74168600 | 2.67490500  | 2.45951400  |
| C | -3.88816600 | 5.19791200  | 1.67558800  |
| H | -4.00369800 | 6.20022800  | -0.23229700 |
| H | -3.55734700 | 4.04050900  | 3.46915400  |
| H | -4.68091000 | 5.79287300  | 2.11953800  |
| H | 7.12288300  | 4.63493200  | -0.57264300 |
| H | 4.04805700  | 1.65022200  | -0.52052200 |
| H | -2.17578500 | 4.84588200  | -1.24148400 |
| O | 2.95286800  | 1.29412400  | 2.18365700  |
| C | 5.32119500  | -1.54613000 | -0.07538600 |
| C | 4.60476800  | -0.89170600 | 0.85391100  |
| H | 4.80419200  | -2.28316500 | -0.69185000 |
| H | 5.05655000  | -0.13560100 | 1.48886000  |
| C | 6.74899800  | -1.38606800 | -0.38244300 |
| C | 7.28553700  | -2.07754500 | -1.48265200 |
| C | 7.61056600  | -0.56688900 | 0.37314500  |
| C | 8.63042100  | -1.95108800 | -1.82719600 |
| H | 6.63614100  | -2.71827900 | -2.07417700 |
| C | 8.95344800  | -0.44087200 | 0.02958500  |
| H | 7.23228400  | -0.03728000 | 1.24213900  |
| C | 9.46939500  | -1.13058400 | -1.07264200 |
| H | 9.02268600  | -2.49425800 | -2.68178300 |
| H | 9.60421900  | 0.19040100  | 0.62762400  |
| H | 10.51841000 | -1.03229900 | -1.33501000 |
| C | 3.14837400  | -1.14588800 | 1.07556400  |
| H | 2.90805600  | -1.21794100 | 2.13943100  |
| H | 2.80747000  | -2.04286000 | 0.56092400  |

|    |             |             |             |
|----|-------------|-------------|-------------|
| O  | 2.30369400  | -0.08068600 | 0.50560400  |
| H  | 0.12659100  | 3.74120600  | -0.69948500 |
| Au | -1.02607200 | 0.16582000  | 0.10309100  |
| C  | -2.15429600 | -1.52453800 | -0.17699800 |
| C  | -3.85204600 | -2.86844800 | -0.83423900 |
| C  | -2.95029300 | -3.64117300 | -0.17812400 |
| H  | -2.94228900 | -4.69607200 | 0.04336200  |
| H  | -4.79201000 | -3.11186900 | -1.30252700 |
| N  | -3.35225200 | -1.57383900 | -0.82320000 |
| N  | -1.91338200 | -2.80470500 | 0.21497400  |
| C  | -4.03579600 | -0.44932400 | -1.43011500 |
| C  | -5.05831100 | 0.18527100  | -0.69606100 |
| C  | -3.68156900 | -0.07011100 | -2.74067600 |
| C  | -5.72297000 | 1.25122600  | -1.31449000 |
| C  | -4.37822000 | 1.00645100  | -3.30394300 |
| C  | -5.38580500 | 1.66148000  | -2.60144700 |
| H  | -6.51909400 | 1.76221700  | -0.78206100 |
| H  | -4.13473200 | 1.32699100  | -4.31199500 |
| H  | -5.91812300 | 2.48791300  | -3.06313700 |
| C  | -0.73528800 | -3.29757600 | 0.90016100  |
| C  | 0.27360300  | -3.90505000 | 0.12443500  |
| C  | -0.68485200 | -3.22504900 | 2.30628800  |
| C  | 1.36185100  | -4.45876700 | 0.81037800  |
| C  | 0.43538900  | -3.78462500 | 2.93514500  |
| C  | 1.44372100  | -4.40082000 | 2.19970000  |
| H  | 2.15166400  | -4.94716600 | 0.24787800  |
| H  | 0.50921000  | -3.75090900 | 4.01750200  |
| H  | 2.29437600  | -4.84163800 | 2.71100400  |
| C  | 0.22245700  | -3.97856900 | -1.39964500 |
| C  | 0.19645100  | -5.43678000 | -1.89792900 |
| C  | 1.38453300  | -3.19246400 | -2.03813100 |
| H  | -0.70458900 | -3.50518700 | -1.73577400 |
| H  | -0.65064800 | -5.99000800 | -1.48011500 |
| H  | 0.11351400  | -5.46418600 | -2.98908100 |
| H  | 1.11018100  | -5.97286400 | -1.62186300 |
| H  | 1.39246200  | -2.15064500 | -1.70254300 |
| H  | 2.35329300  | -3.63837700 | -1.78763800 |
| H  | 1.29315900  | -3.20012600 | -3.12921800 |
| C  | -1.79194400 | -2.60011300 | 3.14942600  |
| C  | -1.27117000 | -1.40751400 | 3.97453300  |
| C  | -2.46753400 | -3.64975300 | 4.05410600  |
| H  | -2.55880400 | -2.21298500 | 2.47203400  |
| H  | -0.82119100 | -0.64526200 | 3.32993000  |
| H  | -2.09321800 | -0.94527500 | 4.53096200  |

|                                              |             |             |                             |
|----------------------------------------------|-------------|-------------|-----------------------------|
| H                                            | -0.51485800 | -1.71851300 | 4.70232200                  |
| H                                            | -2.87482500 | -4.48058600 | 3.46944800                  |
| H                                            | -1.76276000 | -4.06800800 | 4.77989300                  |
| H                                            | -3.29004700 | -3.19444200 | 4.61495400                  |
| C                                            | -2.61749300 | -0.79212600 | -3.56262400                 |
| C                                            | -1.47591800 | 0.15369700  | -3.98240200                 |
| C                                            | -3.24276900 | -1.48711800 | -4.78921200                 |
| H                                            | -2.17420600 | -1.57374000 | -2.93897200                 |
| H                                            | -0.99909100 | 0.61317300  | -3.11053000                 |
| H                                            | -0.71116300 | -0.40022200 | -4.53642200                 |
| H                                            | -1.83637900 | 0.95733500  | -4.63261500                 |
| H                                            | -4.02618700 | -2.19250600 | -4.49446100                 |
| H                                            | -3.69036300 | -0.76202200 | -5.47643000                 |
| H                                            | -2.47818400 | -2.04137300 | -5.34293900                 |
| C                                            | -5.46862200 | -0.25222400 | 0.70728700                  |
| C                                            | -6.90564800 | -0.81095100 | 0.72055000                  |
| C                                            | -5.30816500 | 0.88714300  | 1.73063400                  |
| H                                            | -4.80251000 | -1.06041000 | 1.02354200                  |
| H                                            | -7.01798400 | -1.65087900 | 0.02756700                  |
| H                                            | -7.16888600 | -1.16229700 | 1.72339200                  |
| H                                            | -7.63469500 | -0.04625700 | 0.43355400                  |
| H                                            | -4.28145500 | 1.26457000  | 1.74407400                  |
| H                                            | -5.97104200 | 1.72911700  | 1.50589600                  |
| H                                            | -5.55726300 | 0.53020100  | 2.73542000                  |
| Zero-point correction=                       |             |             | 0.956991 (Hartree/Particle) |
| Thermal correction to Energy=                |             |             | 1.015715                    |
| Thermal correction to Enthalpy=              |             |             | 1.016659                    |
| Thermal correction to Gibbs Free Energy=     |             |             | 0.852824                    |
| Sum of electronic and zero-point Energies=   |             |             | -2522.861991                |
| Sum of electronic and thermal Energies=      |             |             | -2522.803267                |
| Sum of electronic and thermal Enthalpies=    |             |             | -2522.802323                |
| Sum of electronic and thermal Free Energies= |             |             | -2522.966158                |

#### 10-INT1

|   |             |            |            |
|---|-------------|------------|------------|
| C | -2.19687800 | 2.70208000 | 0.88415900 |
| O | -1.26227900 | 3.61029900 | 1.05834000 |
| C | -3.56729700 | 3.15710500 | 1.02583300 |
| C | -3.81048000 | 4.40382200 | 1.64676700 |
| C | -4.65390700 | 2.41311000 | 0.52086700 |
| C | -5.10848700 | 4.87832200 | 1.77374900 |
| H | -2.97679600 | 4.98012600 | 2.03050800 |
| C | -5.94883300 | 2.90391500 | 0.64095200 |
| C | -6.17908300 | 4.13018500 | 1.27067700 |

|    |              |             |             |
|----|--------------|-------------|-------------|
| H  | -5.29006300  | 5.83060100  | 2.26112600  |
| H  | -6.77772800  | 2.32688600  | 0.24431100  |
| C  | -1.62220000  | 1.42971100  | 0.55268500  |
| C  | -2.31615500  | 0.12172000  | 0.33125000  |
| C  | -0.24645200  | 1.55137900  | 0.51464100  |
| C  | 0.06372300   | 2.97459200  | 0.83974700  |
| C  | 0.82811100   | 3.78612600  | -0.18260600 |
| C  | 1.88439700   | 4.60355000  | 0.23072400  |
| C  | 0.46209100   | 3.75443800  | -1.53540500 |
| C  | 2.57393900   | 5.38282200  | -0.69985000 |
| C  | 1.14634300   | 4.53960800  | -2.46084200 |
| H  | -0.35499500  | 3.11902600  | -1.86504400 |
| C  | 2.20373000   | 5.35377900  | -2.04450300 |
| H  | 3.39233100   | 6.01599100  | -0.37162500 |
| H  | 0.85626600   | 4.51549200  | -3.50672800 |
| H  | 2.73493000   | 5.96508500  | -2.76775500 |
| H  | -7.19321600  | 4.50589400  | 1.36786400  |
| H  | -4.49741500  | 1.46467300  | 0.02668900  |
| H  | 2.16723800   | 4.63519400  | 1.27946600  |
| O  | -2.07594900  | -0.60723700 | -0.60890300 |
| C  | -6.30724200  | -1.31779800 | 0.56627300  |
| C  | -5.01227800  | -1.37519100 | 0.21079100  |
| H  | -6.53890200  | -1.30486300 | 1.63239600  |
| H  | -4.70881300  | -1.38879300 | -0.83267300 |
| C  | -7.48269400  | -1.26904800 | -0.31298200 |
| C  | -8.75355300  | -1.11733000 | 0.27030400  |
| C  | -7.40096400  | -1.36634500 | -1.71552800 |
| C  | -9.90358900  | -1.05669900 | -0.51526000 |
| H  | -8.83591300  | -1.04951100 | 1.35233500  |
| C  | -8.54866300  | -1.30665100 | -2.49954500 |
| H  | -6.43631900  | -1.50024800 | -2.19562500 |
| C  | -9.80470200  | -1.15043400 | -1.90382300 |
| H  | -10.87476600 | -0.94096000 | -0.04351200 |
| H  | -8.46704900  | -1.38740600 | -3.57947900 |
| H  | -10.69811900 | -1.10793700 | -2.51937300 |
| C  | -3.90591600  | -1.43283800 | 1.21443200  |
| H  | -3.16976500  | -2.20207000 | 0.96713300  |
| H  | -4.28400400  | -1.58882800 | 2.22560300  |
| O  | -3.18240100  | -0.15272600 | 1.31634600  |
| H  | 0.56411000   | 3.03158500  | 1.81373900  |
| Au | 1.15986800   | 0.11709900  | 0.21540200  |
| C  | 2.57375700   | -1.34582300 | -0.05299100 |
| C  | 4.54176100   | -2.41524400 | -0.37559500 |
| C  | 3.56926100   | -3.36127100 | -0.31014300 |

|   |             |             |             |
|---|-------------|-------------|-------------|
| H | 3.61516300  | -4.43579100 | -0.38360800 |
| H | 5.60693900  | -2.49774400 | -0.51965200 |
| N | 3.91570200  | -1.18701700 | -0.21547000 |
| N | 2.37082500  | -2.69041800 | -0.11075800 |
| C | 4.61508700  | 0.08181800  | -0.22528000 |
| C | 4.79747600  | 0.73882900  | -1.45834800 |
| C | 5.10977500  | 0.58635600  | 0.99404800  |
| C | 5.49630500  | 1.95219600  | -1.43969100 |
| C | 5.80243800  | 1.80267700  | 0.94954800  |
| C | 5.99364300  | 2.47979800  | -0.25165100 |
| H | 5.65609500  | 2.48738700  | -2.37053200 |
| H | 6.20237300  | 2.22084400  | 1.86811600  |
| H | 6.53875700  | 3.41909800  | -0.26281900 |
| C | 1.09079100  | -3.35735300 | 0.02557400  |
| C | 0.68273500  | -3.76818500 | 1.31041500  |
| C | 0.33090500  | -3.59983900 | -1.13589900 |
| C | -0.53851500 | -4.44674300 | 1.40781300  |
| C | -0.87933000 | -4.28575700 | -0.97648400 |
| C | -1.31036500 | -4.70717000 | 0.27827400  |
| H | -0.88211100 | -4.78412100 | 2.38085100  |
| H | -1.48943400 | -4.49360700 | -1.84931600 |
| H | -2.24757900 | -5.24775200 | 0.37555900  |
| C | 1.50721300  | -3.51416100 | 2.56897500  |
| C | 1.94736700  | -4.83424900 | 3.23190800  |
| C | 0.74995800  | -2.61610200 | 3.56683200  |
| H | 2.41595500  | -2.97754900 | 2.28156100  |
| H | 2.51568500  | -5.46173400 | 2.53810300  |
| H | 2.58069200  | -4.63072000 | 4.10146200  |
| H | 1.08747300  | -5.41710300 | 3.57754000  |
| H | 0.47516700  | -1.66060300 | 3.10832900  |
| H | -0.16746700 | -3.09609200 | 3.92313600  |
| H | 1.37534700  | -2.40850200 | 4.44140300  |
| C | 0.77794100  | -3.16615700 | -2.52849300 |
| C | -0.28896200 | -2.30215000 | -3.22854600 |
| C | 1.16141700  | -4.38504500 | -3.39171700 |
| H | 1.67272000  | -2.54551200 | -2.42158000 |
| H | -0.59256000 | -1.45849200 | -2.60312400 |
| H | 0.10469000  | -1.91749800 | -4.17538700 |
| H | -1.18722500 | -2.88352800 | -3.46185200 |
| H | 1.95817000  | -4.97501900 | -2.92712000 |
| H | 0.30321800  | -5.04799600 | -3.54377200 |
| H | 1.51095800  | -4.06044500 | -4.37721600 |
| C | 4.93205000  | -0.13388000 | 2.32769800  |
| C | 4.13705100  | 0.72125000  | 3.33320900  |

|                                              |            |             |                             |
|----------------------------------------------|------------|-------------|-----------------------------|
| C                                            | 6.28969700 | -0.56526700 | 2.91689800                  |
| H                                            | 4.34933300 | -1.04269600 | 2.15184100                  |
| H                                            | 3.15388300 | 0.98822700  | 2.93223200                  |
| H                                            | 3.98588500 | 0.16744300  | 4.26560600                  |
| H                                            | 4.66539400 | 1.64756300  | 3.58167600                  |
| H                                            | 6.84234000 | -1.20639500 | 2.22293500                  |
| H                                            | 6.92123400 | 0.29985300  | 3.14311700                  |
| H                                            | 6.14183500 | -1.12160700 | 3.84810300                  |
| C                                            | 4.28282900 | 0.18302000  | -2.78269200                 |
| C                                            | 5.44338200 | -0.13611800 | -3.74613800                 |
| C                                            | 3.26207900 | 1.13389800  | -3.43635800                 |
| H                                            | 3.76158900 | -0.75732500 | -2.58131800                 |
| H                                            | 6.15370700 | -0.83988900 | -3.30071500                 |
| H                                            | 5.05924700 | -0.58120200 | -4.66964900                 |
| H                                            | 5.99866000 | 0.76714200  | -4.01918600                 |
| H                                            | 2.42167900 | 1.33561200  | -2.76526300                 |
| H                                            | 3.71820500 | 2.09400700  | -3.69899800                 |
| H                                            | 2.86847900 | 0.69085100  | -4.35726300                 |
| Zero-point correction=                       |            |             | 0.964268 (Hartree/Particle) |
| Thermal correction to Energy=                |            |             | 1.022516                    |
| Thermal correction to Enthalpy=              |            |             | 1.023460                    |
| Thermal correction to Gibbs Free Energy=     |            |             | 0.860159                    |
| Sum of electronic and zero-point Energies=   |            |             | -2522.933349                |
| Sum of electronic and thermal Energies=      |            |             | -2522.875101                |
| Sum of electronic and thermal Enthalpies=    |            |             | -2522.874157                |
| Sum of electronic and thermal Free Energies= |            |             | -2523.037459                |

#### 10-TS2

|   |            |            |             |
|---|------------|------------|-------------|
| C | 2.21781800 | 2.88241700 | -0.58108900 |
| O | 1.20398900 | 3.80217100 | -0.54247600 |
| C | 3.55681600 | 3.45740800 | -0.67093500 |
| C | 3.72625100 | 4.72280700 | -1.26553800 |
| C | 4.67300800 | 2.79502100 | -0.12910900 |
| C | 4.99007600 | 5.30004700 | -1.33487100 |
| H | 2.86949600 | 5.24276400 | -1.67940100 |
| C | 5.93138400 | 3.38488300 | -0.19354000 |
| C | 6.09472100 | 4.63346200 | -0.79882900 |
| H | 5.11313000 | 6.27066800 | -1.80461200 |
| H | 6.78496200 | 2.86985800 | 0.23544800  |
| C | 1.67796800 | 1.61252700 | -0.51365500 |
| C | 2.34448700 | 0.28798500 | -0.61568800 |
| C | 0.23448400 | 1.72623000 | -0.36273100 |
| C | 0.00410200 | 3.14017300 | -0.42040800 |



|    |             |             |             |
|----|-------------|-------------|-------------|
| C  | -1.17417200 | 3.99344800  | -0.17596400 |
| C  | -1.21047300 | 5.28784200  | -0.72167500 |
| C  | -2.24155800 | 3.53491900  | 0.61013000  |
| C  | -2.30653900 | 6.11132400  | -0.48347500 |
| C  | -3.33657000 | 4.36666500  | 0.84084900  |
| H  | -2.20574000 | 2.54394600  | 1.04884300  |
| C  | -3.37156500 | 5.65148800  | 0.29624600  |
| H  | -2.33091500 | 7.11068200  | -0.90603300 |
| H  | -4.15492200 | 4.00734300  | 1.45552300  |
| H  | -4.22412800 | 6.29743200  | 0.48256300  |
| H  | 7.07935300  | 5.08821000  | -0.84851100 |
| H  | 4.55900300  | 1.83074800  | 0.34885400  |
| H  | -0.38252900 | 5.64451100  | -1.32524600 |
| O  | 1.88617900  | -0.72033000 | -0.11085100 |
| C  | 6.41054100  | -1.13251500 | -0.34824200 |
| C  | 5.06958700  | -1.20569300 | -0.30153900 |
| H  | 6.86737500  | -0.84444900 | -1.29618600 |
| H  | 4.54808900  | -1.48860900 | 0.60924800  |
| C  | 7.36785500  | -1.40250600 | 0.73203300  |
| C  | 8.73832900  | -1.21543300 | 0.47870100  |
| C  | 6.98124300  | -1.83877500 | 2.01366400  |
| C  | 9.69198900  | -1.44933400 | 1.46813200  |
| H  | 9.05510700  | -0.88421800 | -0.50724100 |
| C  | 7.93259300  | -2.07244800 | 3.00137400  |
| H  | 5.93158800  | -2.00210400 | 2.23835300  |
| C  | 9.29186400  | -1.87824600 | 2.73396000  |
| H  | 10.74510300 | -1.29947500 | 1.24993000  |
| H  | 7.61629900  | -2.41076500 | 3.98373400  |
| H  | 10.03125000 | -2.06414400 | 3.50706400  |
| C  | 4.20913300  | -0.92831900 | -1.49115800 |
| H  | 3.47570700  | -1.72085900 | -1.66077600 |
| H  | 4.80384600  | -0.77145600 | -2.39207800 |
| O  | 3.46470900  | 0.33237300  | -1.34624800 |
| H  | -0.18580500 | 2.37977800  | -1.46195900 |
| Au | -1.10466000 | 0.16254500  | -0.14759500 |
| C  | -2.38753900 | -1.41634000 | 0.04323300  |
| C  | -4.13181600 | -2.73218500 | 0.63513300  |
| C  | -3.33106200 | -3.46050500 | -0.18334200 |
| H  | -3.41586600 | -4.47140500 | -0.54727500 |
| H  | -5.05526600 | -2.97925600 | 1.13320300  |
| N  | -3.54198600 | -1.48134200 | 0.76238900  |
| N  | -2.26551100 | -2.64332300 | -0.53466600 |
| C  | -4.11674700 | -0.41190400 | 1.55226100  |
| C  | -3.67856000 | -0.24125700 | 2.88144100  |

|   |             |             |             |
|---|-------------|-------------|-------------|
| C | -5.13012900 | 0.37701600  | 0.97101600  |
| C | -4.29017000 | 0.77117300  | 3.63190300  |
| C | -5.71352000 | 1.36510200  | 1.77459700  |
| C | -5.29952600 | 1.56245700  | 3.08979100  |
| H | -3.98043200 | 0.93054500  | 4.65988000  |
| H | -6.50825000 | 1.98075100  | 1.36508400  |
| H | -5.77152300 | 2.32880000  | 3.69790000  |
| C | -1.18390800 | -3.07366400 | -1.39999800 |
| C | -1.26434300 | -2.78084800 | -2.77625000 |
| C | -0.12540000 | -3.81067900 | -0.83085000 |
| C | -0.22270800 | -3.24290500 | -3.59046400 |
| C | 0.88249700  | -4.25254100 | -1.69670900 |
| C | 0.83818100  | -3.97103900 | -3.05955600 |
| H | -0.25119800 | -3.04005500 | -4.65647900 |
| H | 1.71068000  | -4.82897900 | -1.29749200 |
| H | 1.62871700  | -4.32955500 | -3.71247100 |
| C | -2.43462700 | -2.02903100 | -3.40362000 |
| C | -3.24841200 | -2.94818600 | -4.33683500 |
| C | -1.97060000 | -0.76017600 | -4.14371300 |
| H | -3.10430400 | -1.70489100 | -2.60172600 |
| H | -3.61318100 | -3.83433900 | -3.80798300 |
| H | -4.11445500 | -2.41284300 | -4.73949300 |
| H | -2.64602600 | -3.29192000 | -5.18396800 |
| H | -1.42221100 | -0.09139700 | -3.47231800 |
| H | -1.31663000 | -0.99992400 | -4.98845900 |
| H | -2.83391800 | -0.21521500 | -4.53954900 |
| C | -0.06856600 | -4.16874300 | 0.65169000  |
| C | 1.30016900  | -3.85338500 | 1.28335600  |
| C | -0.44447600 | -5.64904800 | 0.87232700  |
| H | -0.81017900 | -3.55745900 | 1.17535100  |
| H | 1.59204600  | -2.81742500 | 1.09788400  |
| H | 1.25500300  | -4.01932800 | 2.36487200  |
| H | 2.08634400  | -4.50728400 | 0.89104700  |
| H | -1.44143000 | -5.88071200 | 0.48384200  |
| H | 0.26780300  | -6.31288200 | 0.37114700  |
| H | -0.43403000 | -5.89121900 | 1.94005100  |
| C | -5.61670500 | 0.18189800  | -0.46235000 |
| C | -5.48849900 | 1.47408000  | -1.29150300 |
| C | -7.06227900 | -0.35387800 | -0.49271600 |
| H | -4.97999800 | -0.56887900 | -0.93942900 |
| H | -4.46314000 | 1.85569500  | -1.27855100 |
| H | -5.77084100 | 1.28360100  | -2.33197100 |
| H | -6.14531600 | 2.26468300  | -0.91408400 |
| H | -7.15386200 | -1.29761700 | 0.05427800  |

|   |             |             |             |
|---|-------------|-------------|-------------|
| H | -7.76102900 | 0.35868700  | -0.04240500 |
| H | -7.38313400 | -0.52829600 | -1.52475400 |
| C | -2.60557000 | -1.11486600 | 3.52460800  |
| C | -3.18421400 | -1.94296500 | 4.68942000  |
| C | -1.39315900 | -0.28137800 | 3.98207200  |
| H | -2.24329100 | -1.82135000 | 2.77248900  |
| H | -4.02158100 | -2.56661600 | 4.36076500  |
| H | -2.41484900 | -2.60092200 | 5.10603600  |
| H | -3.54576900 | -1.30090500 | 5.49918200  |
| H | -0.95391300 | 0.27027100  | 3.14446100  |
| H | -1.66912000 | 0.44126600  | 4.75701400  |
| H | -0.62064400 | -0.93511000 | 4.39946200  |

|                                              |                             |
|----------------------------------------------|-----------------------------|
| Zero-point correction=                       | 0.959968 (Hartree/Particle) |
| Thermal correction to Energy=                | 1.018001                    |
| Thermal correction to Enthalpy=              | 1.018945                    |
| Thermal correction to Gibbs Free Energy=     | 0.856350                    |
| Sum of electronic and zero-point Energies=   | -2522.903032                |
| Sum of electronic and thermal Energies=      | -2522.844998                |
| Sum of electronic and thermal Enthalpies=    | -2522.844054                |
| Sum of electronic and thermal Free Energies= | -2523.006649                |

#### 10-INT2

|   |             |            |             |
|---|-------------|------------|-------------|
| C | 0.23831500  | 3.20798600 | -0.70330600 |
| O | -1.14898000 | 3.27104100 | -0.68733500 |
| C | 0.89267800  | 4.18084200 | 0.16897800  |
| C | 0.26745600  | 5.42075900 | 0.40359700  |
| C | 2.11216500  | 3.89610700 | 0.80839800  |
| C | 0.85820000  | 6.35787900 | 1.24583500  |
| H | -0.67279100 | 5.64982000 | -0.08622300 |
| C | 2.69354100  | 4.83823600 | 1.65286200  |
| C | 2.07283600  | 6.07003200 | 1.87273100  |
| H | 0.37244600  | 7.31465100 | 1.41013300  |
| H | 3.63271800  | 4.60715200 | 2.14604400  |
| C | 0.61183600  | 2.19129900 | -1.55158800 |
| C | 1.92216000  | 1.75132100 | -2.08603800 |
| C | -0.61544600 | 1.57056400 | -2.04154300 |
| C | -1.66596900 | 2.34011500 | -1.52094400 |
| C | -3.09855100 | 2.39229100 | -1.78625500 |
| C | -3.92349500 | 3.27682400 | -1.06935300 |
| C | -3.65789900 | 1.59032600 | -2.79853600 |
| C | -5.28254700 | 3.35357100 | -1.36207300 |
| C | -5.01575200 | 1.67571200 | -3.08645100 |

|    |             |             |             |
|----|-------------|-------------|-------------|
| H  | -3.02920800 | 0.91021800  | -3.36486100 |
| C  | -5.83147500 | 2.55679300  | -2.36925300 |
| H  | -5.91316800 | 4.04102300  | -0.80724800 |
| H  | -5.43824200 | 1.06124100  | -3.87504200 |
| H  | -6.89016500 | 2.62487900  | -2.59975000 |
| H  | 2.53246800  | 6.80170700  | 2.53014200  |
| H  | 2.59978700  | 2.94423900  | 0.64189400  |
| H  | -3.49553800 | 3.90096100  | -0.29308600 |
| O  | 2.02234200  | 0.78250900  | -2.81711700 |
| C  | 6.00631300  | 1.27968200  | -0.82782500 |
| C  | 4.93719700  | 1.10508700  | -1.62141500 |
| H  | 6.35010500  | 2.29889000  | -0.64593700 |
| H  | 4.52675400  | 0.11617100  | -1.80799000 |
| C  | 6.77949000  | 0.23088100  | -0.14630900 |
| C  | 7.58775000  | 0.57869400  | 0.94990700  |
| C  | 6.75391100  | -1.11654500 | -0.55397000 |
| C  | 8.31967900  | -0.38783000 | 1.63836600  |
| H  | 7.63517400  | 1.61763400  | 1.26634500  |
| C  | 7.48729500  | -2.08212100 | 0.13204500  |
| H  | 6.18419400  | -1.39911500 | -1.43421300 |
| C  | 8.26858800  | -1.72293100 | 1.23487200  |
| H  | 8.93502400  | -0.09747900 | 2.48470400  |
| H  | 7.46767700  | -3.11455400 | -0.20521300 |
| H  | 8.84583500  | -2.47592200 | 1.76279300  |
| C  | 4.25065800  | 2.24143300  | -2.30886100 |
| H  | 4.09509000  | 2.03045700  | -3.37032200 |
| H  | 4.80273700  | 3.17533900  | -2.19428500 |
| O  | 2.93899000  | 2.54415600  | -1.72374400 |
| H  | -0.65262300 | 0.98921800  | -2.95519700 |
| Au | -0.97701800 | -0.11666700 | -0.55683300 |
| C  | -1.15166500 | -1.70746900 | 0.67530900  |
| C  | -1.89897800 | -3.14167500 | 2.24616400  |
| C  | -0.75518300 | -3.66014600 | 1.72951600  |
| H  | -0.22029500 | -4.56920800 | 1.95234300  |
| H  | -2.56529600 | -3.50665200 | 3.01092900  |
| N  | -2.13148700 | -1.94210900 | 1.58684800  |
| N  | -0.30692300 | -2.76691100 | 0.76614500  |
| C  | -3.27696600 | -1.09117600 | 1.84343600  |
| C  | -3.14970900 | -0.05787200 | 2.79299100  |
| C  | -4.47872100 | -1.36596700 | 1.16022900  |
| C  | -4.28618300 | 0.72115400  | 3.04387900  |
| C  | -5.58022400 | -0.55281500 | 1.45338700  |
| C  | -5.48742400 | 0.47857400  | 2.38360900  |
| H  | -4.22967500 | 1.52402100  | 3.77218400  |

|   |             |             |             |
|---|-------------|-------------|-------------|
| H | -6.52400200 | -0.73468100 | 0.94909300  |
| H | -6.35697700 | 1.09220500  | 2.59966700  |
| C | 0.89673900  | -2.96141200 | -0.01920500 |
| C | 0.78836400  | -3.62078300 | -1.26016700 |
| C | 2.12236100  | -2.51248700 | 0.51127900  |
| C | 1.96989600  | -3.81084200 | -1.98638200 |
| C | 3.26998400  | -2.73161300 | -0.26071800 |
| C | 3.19546700  | -3.37068000 | -1.49537200 |
| H | 1.92830200  | -4.31412800 | -2.94714400 |
| H | 4.23365300  | -2.39828600 | 0.11062200  |
| H | 4.09842500  | -3.53357300 | -2.07651300 |
| C | -0.53422400 | -4.13673300 | -1.81945200 |
| C | -0.52680700 | -5.67327500 | -1.94653200 |
| C | -0.87918600 | -3.46985900 | -3.16502200 |
| H | -1.33060500 | -3.87414200 | -1.11640100 |
| H | -0.31805500 | -6.15436100 | -0.98573000 |
| H | -1.49883000 | -6.03094000 | -2.30104800 |
| H | 0.23174600  | -6.01223000 | -2.65923000 |
| H | -0.91535600 | -2.37976400 | -3.06913400 |
| H | -0.14041700 | -3.71110900 | -3.93567800 |
| H | -1.85489200 | -3.81638700 | -3.52144900 |
| C | 2.24186400  | -1.81029400 | 1.86102800  |
| C | 2.65147000  | -0.33424700 | 1.68649100  |
| C | 3.21355500  | -2.54596200 | 2.80446600  |
| H | 1.25894900  | -1.81882000 | 2.34224400  |
| H | 1.92853800  | 0.20368000  | 1.06414300  |
| H | 2.70082000  | 0.16346100  | 2.66087300  |
| H | 3.63493200  | -0.24537000 | 1.21426000  |
| H | 2.92493900  | -3.59294000 | 2.94083800  |
| H | 4.23899200  | -2.52860300 | 2.42246200  |
| H | 3.22069200  | -2.06526500 | 3.78798200  |
| C | -4.62104500 | -2.49739400 | 0.14634400  |
| C | -5.01546200 | -1.96440600 | -1.24415300 |
| C | -5.61800800 | -3.56715700 | 0.63464800  |
| H | -3.64824800 | -2.98607300 | 0.03734300  |
| H | -4.29973800 | -1.21706100 | -1.60010600 |
| H | -5.04753100 | -2.78490500 | -1.96850200 |
| H | -6.00532900 | -1.49686100 | -1.23014600 |
| H | -5.32260500 | -3.97947700 | 1.60463300  |
| H | -6.62639100 | -3.15495100 | 0.74325300  |
| H | -5.67222500 | -4.39284700 | -0.08208500 |
| C | -1.85626900 | 0.22433800  | 3.55144100  |
| C | -2.02175200 | -0.05275900 | 5.05902800  |
| C | -1.35266500 | 1.65917200  | 3.30283200  |

|                                              |             |             |                             |
|----------------------------------------------|-------------|-------------|-----------------------------|
| H                                            | -1.08440400 | -0.45523000 | 3.17817600                  |
| H                                            | -2.34396000 | -1.08220300 | 5.24493300                  |
| H                                            | -1.07326700 | 0.10531800  | 5.58234100                  |
| H                                            | -2.76479700 | 0.61372800  | 5.50868800                  |
| H                                            | -1.21235500 | 1.85324000  | 2.23457900                  |
| H                                            | -2.05402500 | 2.40571100  | 3.68929200                  |
| H                                            | -0.39348600 | 1.81704200  | 3.80637600                  |
| Zero-point correction=                       |             |             | 0.964285 (Hartree/Particle) |
| Thermal correction to Energy=                |             |             | 1.022649                    |
| Thermal correction to Enthalpy=              |             |             | 1.023593                    |
| Thermal correction to Gibbs Free Energy=     |             |             | 0.860879                    |
| Sum of electronic and zero-point Energies=   |             |             | -2522.954701                |
| Sum of electronic and thermal Energies=      |             |             | -2522.896337                |
| Sum of electronic and thermal Enthalpies=    |             |             | -2522.895393                |
| Sum of electronic and thermal Free Energies= |             |             | -2523.058107                |

### 3-INT1

|   |             |             |             |
|---|-------------|-------------|-------------|
| C | -1.56087400 | -2.32797300 | -0.60420100 |
| O | -2.79600900 | -2.77115000 | -0.40910400 |
| C | -0.63053800 | -3.43067100 | -0.87968800 |
| C | -0.92965800 | -4.72293400 | -0.40011700 |
| C | 0.49248600  | -3.25010100 | -1.70991900 |
| C | -0.11057700 | -5.79855900 | -0.72340700 |
| H | -1.80051900 | -4.86849500 | 0.22846800  |
| C | 1.29285200  | -4.33723700 | -2.05096200 |
| C | 0.99792400  | -5.60946600 | -1.55504800 |
| H | -0.33953100 | -6.78655200 | -0.33659700 |
| H | 2.14643400  | -4.18755800 | -2.70340700 |
| C | -1.20083800 | -0.95068300 | -0.59466800 |
| C | -2.21941500 | 0.00539200  | -0.68898400 |
| C | -1.98644200 | 1.36410400  | -0.98818900 |
| C | -1.91826700 | 2.51966600  | -1.37945900 |
| C | -1.83642000 | 3.85315100  | -1.85727400 |
| C | -2.90343500 | 4.75188000  | -1.64109600 |
| C | -0.69952000 | 4.28478400  | -2.57413900 |
| C | -2.82821700 | 6.05164100  | -2.12945400 |
| C | -0.63910400 | 5.58544900  | -3.06252100 |
| H | 0.11579800  | 3.58955200  | -2.74318500 |
| C | -1.69936100 | 6.46982400  | -2.84066100 |
| H | -3.64985500 | 6.74002100  | -1.95893600 |
| H | 0.23357900  | 5.91246800  | -3.61909200 |
| H | -1.64680300 | 7.48440500  | -3.22347000 |
| H | 1.62612100  | -6.45484000 | -1.82006000 |

|    |             |             |             |
|----|-------------|-------------|-------------|
| H  | 0.70872900  | -2.26866200 | -2.11458400 |
| H  | -3.77717800 | 4.42033900  | -1.08972300 |
| Au | 0.71783000  | -0.31337800 | -0.09024700 |
| C  | 2.53858300  | 0.31183100  | 0.63255000  |
| C  | 4.11544600  | 1.27840800  | 1.94574400  |
| C  | 4.76016800  | 0.67175400  | 0.91888100  |
| H  | 5.80865100  | 0.59794800  | 0.67975900  |
| H  | 4.48729300  | 1.83980900  | 2.78722400  |
| N  | 2.75734100  | 1.05320800  | 1.75683700  |
| N  | 3.78346400  | 0.07953500  | 0.12729000  |
| C  | 1.74430300  | 1.52842100  | 2.67743300  |
| C  | 1.36587400  | 2.88527600  | 2.61652700  |
| C  | 1.22446800  | 0.63237000  | 3.63402100  |
| C  | 0.41890600  | 3.33128400  | 3.54652800  |
| C  | 0.27436000  | 1.13472900  | 4.53226400  |
| C  | -0.12622500 | 2.46665700  | 4.49123600  |
| H  | 0.10740600  | 4.37081100  | 3.53280700  |
| H  | -0.14638300 | 0.47425800  | 5.28391700  |
| H  | -0.85787500 | 2.83473800  | 5.20451700  |
| C  | 4.09386600  | -0.75258300 | -1.01584900 |
| C  | 4.50951400  | -2.07860900 | -0.77492800 |
| C  | 4.01976800  | -0.19772400 | -2.30862300 |
| C  | 4.83941000  | -2.86032600 | -1.88933400 |
| C  | 4.35373400  | -1.02982000 | -3.38473100 |
| C  | 4.75900700  | -2.34609700 | -3.18093600 |
| H  | 5.17135600  | -3.88323300 | -1.74052700 |
| H  | 4.31032200  | -0.63530000 | -4.39508300 |
| H  | 5.02572300  | -2.96819000 | -4.03043700 |
| C  | 4.63254100  | -2.67210300 | 0.62685600  |
| C  | 6.09485400  | -3.03728800 | 0.95193800  |
| C  | 3.70228800  | -3.88369500 | 0.82236100  |
| H  | 4.32124100  | -1.91315400 | 1.34987400  |
| H  | 6.75838500  | -2.17207100 | 0.85429200  |
| H  | 6.17386500  | -3.41108400 | 1.97782600  |
| H  | 6.47110200  | -3.81911100 | 0.28421900  |
| H  | 2.65852000  | -3.61664000 | 0.63574200  |
| H  | 3.96306000  | -4.70627700 | 0.14862600  |
| H  | 3.78484500  | -4.25928800 | 1.84770700  |
| C  | 3.63834100  | 1.25614000  | -2.56968500 |
| C  | 2.40110500  | 1.36794200  | -3.48038600 |
| C  | 4.82992900  | 2.04367700  | -3.15124200 |
| H  | 3.37790700  | 1.71781200  | -1.61304100 |
| H  | 1.53693300  | 0.86139400  | -3.03847200 |
| H  | 2.14250800  | 2.42138000  | -3.63539200 |

|   |              |             |             |
|---|--------------|-------------|-------------|
| H | 2.58262600   | 0.93007000  | -4.46737200 |
| H | 5.70221800   | 1.99420000  | -2.49205000 |
| H | 5.13003600   | 1.65341800  | -4.12919600 |
| H | 4.56338200   | 3.09776300  | -3.28160100 |
| C | 1.68136100   | -0.81817200 | 3.76096600  |
| C | 0.50472600   | -1.80670200 | 3.65796500  |
| C | 2.47294800   | -1.03124700 | 5.06754600  |
| H | 2.35671500   | -1.04082100 | 2.93044400  |
| H | -0.03836900  | -1.67457200 | 2.71687800  |
| H | 0.87435200   | -2.83655100 | 3.69841200  |
| H | -0.20628800  | -1.68043800 | 4.48108600  |
| H | 3.33736800   | -0.36222900 | 5.12671700  |
| H | 1.84843100   | -0.84534500 | 5.94751500  |
| H | 2.83720500   | -2.06202000 | 5.12921500  |
| C | 1.96664900   | 3.86952600  | 1.61667800  |
| C | 2.93881300   | 4.84335800  | 2.31365100  |
| C | 0.88422200   | 4.64281400  | 0.84297800  |
| H | 2.54061100   | 3.29907100  | 0.88016600  |
| H | 3.74895800   | 4.31413000  | 2.82523600  |
| H | 3.38894400   | 5.52402300  | 1.58351500  |
| H | 2.41820900   | 5.45070700  | 3.06146000  |
| H | 0.17898400   | 3.96175700  | 0.36006100  |
| H | 0.31415300   | 5.31019400  | 1.49703400  |
| H | 1.34467200   | 5.26349700  | 0.06765200  |
| C | -6.82646800  | -0.13198200 | 0.13986500  |
| C | -5.89948400  | -0.25460000 | -0.82645800 |
| H | -6.62045500  | 0.57209400  | 0.94735200  |
| H | -6.03654500  | -0.94007900 | -1.65938900 |
| C | -8.11034500  | -0.83046300 | 0.25451600  |
| C | -8.90267800  | -0.59418200 | 1.39205600  |
| C | -8.58882600  | -1.72817300 | -0.71913800 |
| C | -10.12861900 | -1.23535000 | 1.55928800  |
| H | -8.54907100  | 0.09892800  | 2.15131000  |
| C | -9.81266300  | -2.36758400 | -0.55259900 |
| H | -8.00612000  | -1.92321100 | -1.61422100 |
| C | -10.58698300 | -2.12486100 | 0.58701300  |
| H | -10.72490600 | -1.03979300 | 2.44527700  |
| H | -10.16831100 | -3.05561500 | -1.31364700 |
| H | -11.54250200 | -2.62508600 | 0.71193800  |
| C | -4.64574200  | 0.54645500  | -0.83236500 |
| H | -4.64587100  | 1.32058300  | -0.06031500 |
| H | -4.44242100  | 1.00481700  | -1.80433400 |
| O | -3.52180200  | -0.36828300 | -0.54343700 |
| H | -3.39584000  | -2.00490600 | -0.26796800 |



|                                              |                             |
|----------------------------------------------|-----------------------------|
| Zero-point correction=                       | 0.957607 (Hartree/Particle) |
| Thermal correction to Energy=                | 1.015833                    |
| Thermal correction to Enthalpy=              | 1.016777                    |
| Thermal correction to Gibbs Free Energy=     | 0.854843                    |
| Sum of electronic and zero-point Energies=   | -2447.643562                |
| Sum of electronic and thermal Energies=      | -2447.585336                |
| Sum of electronic and thermal Enthalpies=    | -2447.584392                |
| Sum of electronic and thermal Free Energies= | -2447.746326                |

### 3-TS2

|    |             |             |             |
|----|-------------|-------------|-------------|
| C  | 0.84904300  | -1.77171800 | -2.05099200 |
| O  | 2.08534800  | -2.11574400 | -2.46011900 |
| C  | -0.16419600 | -2.59061600 | -2.75277600 |
| C  | -1.37158500 | -2.04560200 | -3.21890900 |
| C  | 0.13208600  | -3.93564700 | -3.04151600 |
| C  | -2.26257200 | -2.83206300 | -3.94837900 |
| H  | -1.58685200 | -0.99820100 | -3.03802800 |
| C  | -0.77194600 | -4.72380900 | -3.74774500 |
| C  | -1.97072800 | -4.17282100 | -4.20752500 |
| H  | -3.18192600 | -2.39452100 | -4.32399100 |
| H  | -0.53730000 | -5.76451100 | -3.94982500 |
| C  | 0.57433800  | -0.80774600 | -1.08094700 |
| C  | 1.75194100  | -0.00155900 | -0.59694800 |
| C  | 1.61508200  | 0.78555700  | 0.63216800  |
| C  | 1.70968000  | 1.43852300  | 1.65242100  |
| C  | 1.83845700  | 2.19919500  | 2.85615500  |
| C  | 3.11021700  | 2.63695400  | 3.27528500  |
| C  | 0.71235900  | 2.51750700  | 3.64015300  |
| C  | 3.24815000  | 3.37449100  | 4.44843200  |
| C  | 0.85964600  | 3.25641700  | 4.81177600  |
| H  | -0.26669500 | 2.17708800  | 3.32144700  |
| C  | 2.12529100  | 3.68670300  | 5.21859900  |
| H  | 4.23308200  | 3.70506000  | 4.76366800  |
| H  | -0.01394800 | 3.49588900  | 5.41048500  |
| H  | 2.23605800  | 4.26143200  | 6.13292500  |
| H  | -2.66879200 | -4.78243200 | -4.77364400 |
| H  | 1.07416600  | -4.35378800 | -2.70517100 |
| H  | 3.98150500  | 2.39014900  | 2.67681800  |
| Au | -1.29827900 | -0.39202700 | -0.30600100 |
| C  | -3.11687300 | 0.00441700  | 0.57666900  |
| C  | -5.02614400 | 1.02924100  | 1.25736500  |
| C  | -4.88422200 | -0.09651100 | 1.99900500  |
| H  | -5.50039400 | -0.51967100 | 2.77558400  |

|   |             |             |             |
|---|-------------|-------------|-------------|
| H | -5.78814000 | 1.79150400  | 1.25972100  |
| N | -3.94125300 | 1.07747700  | 0.38796100  |
| N | -3.71599100 | -0.71510700 | 1.57068100  |
| C | -3.81749800 | 2.09403900  | -0.63899700 |
| C | -3.15343100 | 3.29850500  | -0.33584800 |
| C | -4.44850100 | 1.86665900  | -1.88135200 |
| C | -3.12502500 | 4.28783500  | -1.32748800 |
| C | -4.38496200 | 2.89068100  | -2.83389900 |
| C | -3.73186100 | 4.08924600  | -2.56306400 |
| H | -2.63141800 | 5.23243400  | -1.12318300 |
| H | -4.86211500 | 2.75078600  | -3.79804900 |
| H | -3.70319200 | 4.87276600  | -3.31460800 |
| C | -3.30034400 | -2.01925700 | 2.05253200  |
| C | -3.86842500 | -3.15912600 | 1.44752700  |
| C | -2.40369700 | -2.10038400 | 3.13664800  |
| C | -3.49145500 | -4.41099900 | 1.94964100  |
| C | -2.06856100 | -3.37883400 | 3.59901800  |
| C | -2.60109000 | -4.52290800 | 3.01193500  |
| H | -3.90822100 | -5.30877000 | 1.50424700  |
| H | -1.38579300 | -3.48071800 | 4.43569000  |
| H | -2.32637900 | -5.50358300 | 3.38909400  |
| C | -4.88085000 | -3.08724000 | 0.30807100  |
| C | -6.25973800 | -3.61139800 | 0.75743000  |
| C | -4.38476800 | -3.83297100 | -0.94418900 |
| H | -5.00957700 | -2.03817600 | 0.02723900  |
| H | -6.63720700 | -3.06086800 | 1.62515100  |
| H | -6.98916300 | -3.50853500 | -0.05267600 |
| H | -6.21487000 | -4.67055200 | 1.03115200  |
| H | -3.42716100 | -3.43629000 | -1.29090600 |
| H | -4.25823300 | -4.90356100 | -0.75320600 |
| H | -5.11163200 | -3.72920500 | -1.75707800 |
| C | -1.84795200 | -0.86686900 | 3.84109900  |
| C | -0.34190300 | -0.98333900 | 4.13390800  |
| C | -2.63613700 | -0.58062300 | 5.13669900  |
| H | -1.98257000 | -0.00983700 | 3.17294900  |
| H | 0.22692200  | -1.16566500 | 3.21747300  |
| H | 0.02613600  | -0.05674700 | 4.58358900  |
| H | -0.12265900 | -1.79108400 | 4.83905000  |
| H | -3.70266000 | -0.43469300 | 4.93812000  |
| H | -2.54108000 | -1.41063400 | 5.84475900  |
| H | -2.25717300 | 0.32295300  | 5.62616900  |
| C | -5.22554000 | 0.59073200  | -2.19276800 |
| C | -4.92152500 | 0.04054400  | -3.59781700 |
| C | -6.74269100 | 0.81666100  | -2.02083400 |

|   |             |             |             |
|---|-------------|-------------|-------------|
| H | -4.91837300 | -0.17629500 | -1.47596200 |
| H | -3.84541300 | -0.06805400 | -3.76023900 |
| H | -5.39041300 | -0.94088200 | -3.72245900 |
| H | -5.31657700 | 0.68783800  | -4.38730100 |
| H | -6.99251200 | 1.14672800  | -1.00808800 |
| H | -7.10530200 | 1.57882900  | -2.71873400 |
| H | -7.29313700 | -0.10918000 | -2.21814400 |
| C | -2.52206900 | 3.57722900  | 1.02404400  |
| C | -3.39336100 | 4.55192900  | 1.84290900  |
| C | -1.08209000 | 4.10426500  | 0.89389400  |
| H | -2.47255300 | 2.63272400  | 1.57507700  |
| H | -4.40626600 | 4.16260700  | 1.98548800  |
| H | -2.95498600 | 4.72276900  | 2.83181600  |
| H | -3.47890900 | 5.52179500  | 1.34166400  |
| H | -0.45291000 | 3.38425700  | 0.36111500  |
| H | -1.04345500 | 5.06042300  | 0.36240500  |
| H | -0.64493600 | 4.26588900  | 1.88319800  |
| C | 5.60359000  | -2.30418900 | 0.98510100  |
| C | 4.48558900  | -2.38837700 | 0.24578600  |
| H | 5.60128300  | -1.60608500 | 1.82341100  |
| H | 4.42323700  | -3.06616800 | -0.60352300 |
| C | 6.85768700  | -3.04802300 | 0.81362800  |
| C | 7.93470600  | -2.75746100 | 1.66951000  |
| C | 7.03794400  | -4.03862400 | -0.17045600 |
| C | 9.15251900  | -3.42431800 | 1.54650800  |
| H | 7.81119600  | -1.99929900 | 2.43901700  |
| C | 8.25313700  | -4.70443600 | -0.29386200 |
| H | 6.22246900  | -4.29572900 | -0.83960100 |
| C | 9.31618700  | -4.40003500 | 0.56279800  |
| H | 9.97072300  | -3.18402600 | 2.21876700  |
| H | 8.37335100  | -5.46695000 | -1.05774400 |
| H | 10.26220900 | -4.92375900 | 0.46445000  |
| C | 3.25765900  | -1.59282500 | 0.54147700  |
| H | 3.36012600  | -1.01858500 | 1.46683800  |
| H | 2.36832800  | -2.23120400 | 0.62176400  |
| O | 3.04353200  | -0.66182100 | -0.56667300 |
| H | 2.73105900  | -1.61257000 | -1.91508400 |
| C | 2.45913500  | 3.24236600  | -1.66562400 |
| C | 3.34746100  | 4.30983600  | -1.79806700 |
| C | 4.70186200  | 4.05993100  | -2.03057200 |
| C | 5.13487100  | 2.73499400  | -2.12224400 |
| C | 4.21649000  | 1.69228400  | -1.98798100 |
| H | 5.40352000  | 4.87889900  | -2.13985000 |
| H | 1.39612200  | 3.35174500  | -1.48931300 |

|                                              |            |            |                             |
|----------------------------------------------|------------|------------|-----------------------------|
| H                                            | 4.47335400 | 0.64184800 | -2.03229400                 |
| Cl                                           | 6.80332000 | 2.36795100 | -2.40741600                 |
| Cl                                           | 2.75563800 | 5.93350500 | -1.67502700                 |
| N                                            | 2.94104000 | 2.00476900 | -1.76221800                 |
| O                                            | 1.78748400 | 0.82023000 | -1.77388300                 |
| Zero-point correction=                       |            |            | 1.031041 (Hartree/Particle) |
| Thermal correction to Energy=                |            |            | 1.097788                    |
| Thermal correction to Enthalpy=              |            |            | 1.098732                    |
| Thermal correction to Gibbs Free Energy=     |            |            | 0.913991                    |
| Sum of electronic and zero-point Energies=   |            |            | -3690.150102                |
| Sum of electronic and thermal Energies=      |            |            | -3690.083355                |
| Sum of electronic and thermal Enthalpies=    |            |            | -3690.082410                |
| Sum of electronic and thermal Free Energies= |            |            | -3690.267151                |

### 3-INT2

|   |            |             |             |
|---|------------|-------------|-------------|
| C | 1.60003000 | -1.79837400 | -1.35648300 |
| O | 2.04003500 | -2.01705400 | -2.56293300 |
| C | 1.67819600 | -2.89792400 | -0.41755400 |
| C | 1.28760700 | -2.73107900 | 0.92884100  |
| C | 2.22050700 | -4.13232600 | -0.83857600 |
| C | 1.45039800 | -3.77340700 | 1.83223300  |
| H | 0.85026500 | -1.79355300 | 1.25415200  |
| C | 2.36845800 | -5.17202900 | 0.07056300  |
| C | 1.98733800 | -4.99320700 | 1.40491500  |
| H | 1.14553000 | -3.64069700 | 2.86468200  |
| H | 2.78394900 | -6.11998500 | -0.25507700 |
| C | 1.07713800 | -0.46494200 | -1.08014700 |
| C | 2.14221100 | 0.64032900  | -1.01520400 |
| C | 1.89115100 | 1.87866000  | -0.31898400 |
| C | 1.80882000 | 2.93805300  | 0.26887600  |
| C | 1.70852700 | 4.19334100  | 0.94205400  |
| C | 1.95486500 | 4.28172900  | 2.32609200  |
| C | 1.37853500 | 5.35828200  | 0.22214000  |
| C | 1.86720600 | 5.51178400  | 2.97289800  |
| C | 1.29347000 | 6.58282700  | 0.87963700  |
| H | 1.19839900 | 5.29120300  | -0.84563400 |
| C | 1.53639800 | 6.66293000  | 2.25329200  |
| H | 2.06118600 | 5.57361200  | 4.03933900  |
| H | 1.04193600 | 7.47744100  | 0.31838500  |
| H | 1.47201300 | 7.62042900  | 2.76101600  |
| H | 2.10679200 | -5.80788400 | 2.11296200  |
| H | 2.52709800 | -4.25691700 | -1.87068500 |
| H | 2.21658400 | 3.38601600  | 2.87999900  |

|    |             |             |             |
|----|-------------|-------------|-------------|
| Au | -0.90418900 | -0.31709800 | -0.42546700 |
| C  | -2.86815800 | -0.13596000 | 0.11896300  |
| C  | -5.07586900 | 0.35093800  | 0.07244700  |
| C  | -4.81288700 | -0.22919300 | 1.27133800  |
| H  | -5.45355400 | -0.45963800 | 2.10718400  |
| H  | -5.99260900 | 0.72953400  | -0.34991300 |
| N  | -3.87446700 | 0.40080000  | -0.62191700 |
| N  | -3.45492800 | -0.52256700 | 1.28413200  |
| C  | -3.73724700 | 0.94731600  | -1.95781100 |
| C  | -3.49672800 | 2.32865900  | -2.09541100 |
| C  | -3.88115000 | 0.07893500  | -3.05844000 |
| C  | -3.39068000 | 2.83282600  | -3.39748100 |
| C  | -3.76462000 | 0.64105100  | -4.33569500 |
| C  | -3.52096900 | 2.00100300  | -4.50575800 |
| H  | -3.20567000 | 3.89236400  | -3.54377900 |
| H  | -3.87008200 | 0.00435500  | -5.20854000 |
| H  | -3.43670500 | 2.41487100  | -5.50617400 |
| C  | -2.78110700 | -1.17746200 | 2.38555600  |
| C  | -2.77485100 | -2.58664000 | 2.42294500  |
| C  | -2.19153700 | -0.37992300 | 3.38687100  |
| C  | -2.13523100 | -3.19556000 | 3.51031300  |
| C  | -1.56249800 | -1.04512000 | 4.44718800  |
| C  | -1.53387500 | -2.43590300 | 4.51087800  |
| H  | -2.11902300 | -4.27898700 | 3.57836900  |
| H  | -1.10023800 | -0.46433400 | 5.23931400  |
| H  | -1.05355300 | -2.92900600 | 5.35127700  |
| C  | -3.44334200 | -3.44955500 | 1.35627200  |
| C  | -4.62294000 | -4.25021000 | 1.94316800  |
| C  | -2.43352400 | -4.37978900 | 0.65815900  |
| H  | -3.85241200 | -2.78730100 | 0.58778200  |
| H  | -5.36376400 | -3.59187100 | 2.40768700  |
| H  | -5.12421200 | -4.82132000 | 1.15512500  |
| H  | -4.28704200 | -4.96072800 | 2.70552300  |
| H  | -1.61374900 | -3.80994100 | 0.21021000  |
| H  | -1.99907000 | -5.10162000 | 1.35759800  |
| H  | -2.93006600 | -4.94807700 | -0.13505700 |
| C  | -2.23224800 | 1.14504900  | 3.36742400  |
| C  | -0.81712600 | 1.75119400  | 3.31082400  |
| C  | -3.02737500 | 1.69698200  | 4.56747400  |
| H  | -2.75316300 | 1.46191600  | 2.45934300  |
| H  | -0.27294400 | 1.40761300  | 2.42532000  |
| H  | -0.87357500 | 2.84338800  | 3.26819900  |
| H  | -0.23045900 | 1.48455300  | 4.19662700  |
| H  | -4.04469200 | 1.29399700  | 4.59427600  |

|                        |             |             |                             |
|------------------------|-------------|-------------|-----------------------------|
| H                      | -2.54581900 | 1.44650000  | 5.51828800                  |
| H                      | -3.09636000 | 2.78783100  | 4.50754200                  |
| C                      | -4.16573100 | -1.41287600 | -2.91224300                 |
| C                      | -3.05207900 | -2.26629100 | -3.54909000                 |
| C                      | -5.54709300 | -1.77972000 | -3.49003100                 |
| H                      | -4.18517600 | -1.65573100 | -1.84558200                 |
| H                      | -2.07499200 | -2.02216100 | -3.11949900                 |
| H                      | -3.24596700 | -3.33070300 | -3.38022800                 |
| H                      | -2.99239700 | -2.10915300 | -4.63079900                 |
| H                      | -6.34725800 | -1.20743600 | -3.00998300                 |
| H                      | -5.59689200 | -1.58145500 | -4.56546900                 |
| H                      | -5.75352200 | -2.84420200 | -3.33854300                 |
| C                      | -3.35832500 | 3.27298400  | -0.90523700                 |
| C                      | -4.48678700 | 4.32307200  | -0.88735400                 |
| C                      | -1.97193600 | 3.94363600  | -0.87588600                 |
| H                      | -3.44916800 | 2.68480700  | 0.01296700                  |
| H                      | -5.47479400 | 3.85185900  | -0.87194200                 |
| H                      | -4.40092400 | 4.95919500  | -0.00039300                 |
| H                      | -4.44393700 | 4.97323500  | -1.76722400                 |
| H                      | -1.17115800 | 3.19848100  | -0.84769400                 |
| H                      | -1.81392400 | 4.57466900  | -1.75682800                 |
| H                      | -1.87629900 | 4.58088700  | 0.00910100                  |
| C                      | 6.75747000  | 0.38525700  | -0.14950800                 |
| C                      | 5.60871100  | -0.29643000 | -0.27923000                 |
| H                      | 6.69440900  | 1.42205100  | 0.18288200                  |
| H                      | 5.59990600  | -1.32841400 | -0.62263900                 |
| C                      | 8.12256000  | -0.09302000 | -0.40308900                 |
| C                      | 9.18734600  | 0.81702300  | -0.28269400                 |
| C                      | 8.41996400  | -1.42087300 | -0.76364100                 |
| C                      | 10.50274300 | 0.42188500  | -0.52059100                 |
| H                      | 8.97622400  | 1.84605400  | -0.00266100                 |
| C                      | 9.73242600  | -1.81603300 | -1.00144600                 |
| H                      | 7.62139300  | -2.15097400 | -0.85445400                 |
| C                      | 10.77984800 | -0.89679200 | -0.88189300                 |
| H                      | 11.30928300 | 1.14239500  | -0.42335100                 |
| H                      | 9.94303600  | -2.84486700 | -1.27853900                 |
| H                      | 11.80306100 | -1.20943600 | -1.06701700                 |
| C                      | 4.27856400  | 0.29221700  | 0.05204300                  |
| H                      | 4.37281900  | 1.32227100  | 0.41056400                  |
| H                      | 3.76256800  | -0.29857500 | 0.82401600                  |
| O                      | 3.46287100  | 0.27404200  | -1.15299400                 |
| H                      | 2.03810600  | -1.13186500 | -3.01114400                 |
| O                      | 1.43833400  | 0.40731600  | -2.21883000                 |
| Zero-point correction= |             |             | 0.960793 (Hartree/Particle) |

|                                              |              |
|----------------------------------------------|--------------|
| Thermal correction to Energy=                | 1.020029     |
| Thermal correction to Enthalpy=              | 1.020973     |
| Thermal correction to Gibbs Free Energy=     | 0.855423     |
| Sum of electronic and zero-point Energies=   | -2522.821235 |
| Sum of electronic and thermal Energies=      | -2522.761998 |
| Sum of electronic and thermal Enthalpies=    | -2522.761054 |
| Sum of electronic and thermal Free Energies= | -2522.926605 |

### 3-TS3

|    |             |             |             |
|----|-------------|-------------|-------------|
| C  | -1.49625600 | -1.17772300 | -1.06615700 |
| O  | -2.47225300 | -0.87582100 | -2.02408200 |
| C  | -0.72444000 | -2.43209400 | -1.47082700 |
| C  | -0.17905700 | -3.28323000 | -0.49984300 |
| C  | -0.58629000 | -2.77334300 | -2.82289000 |
| C  | 0.43841500  | -4.47797500 | -0.87051400 |
| H  | -0.24515200 | -2.99943600 | 0.54523900  |
| C  | 0.03738900  | -3.96724100 | -3.19438600 |
| C  | 0.53621600  | -4.83053300 | -2.21938100 |
| H  | 0.84412200  | -5.13350600 | -0.10599200 |
| H  | 0.13030700  | -4.21943800 | -4.24640000 |
| C  | -0.68115500 | 0.02473500  | -0.61347300 |
| C  | -1.38966000 | 1.20885300  | -0.43534200 |
| C  | -0.75277300 | 2.45582500  | -0.16476100 |
| C  | -0.44383600 | 3.62190500  | 0.01966000  |
| C  | -0.10314200 | 4.99385600  | 0.21889400  |
| C  | -0.16489200 | 5.56747700  | 1.50465000  |
| C  | 0.25758400  | 5.80182400  | -0.87830400 |
| C  | 0.14058400  | 6.91419600  | 1.68464000  |
| C  | 0.55881600  | 7.14780800  | -0.68645500 |
| H  | 0.29302000  | 5.36616200  | -1.87103100 |
| C  | 0.50396000  | 7.70654400  | 0.59284400  |
| H  | 0.09121300  | 7.34743100  | 2.67897900  |
| H  | 0.83409500  | 7.76269000  | -1.53788900 |
| H  | 0.73927000  | 8.75646300  | 0.73782300  |
| H  | 1.00960900  | -5.76431400 | -2.50695900 |
| H  | -0.95204600 | -2.10074100 | -3.59300500 |
| H  | -0.45337300 | 4.95122200  | 2.34946300  |
| Au | 1.33653400  | -0.09057300 | -0.17192800 |
| C  | 3.34356700  | -0.14730700 | 0.31001300  |
| C  | 5.27630800  | -0.16349000 | 1.50537900  |
| C  | 5.60829700  | -0.00671500 | 0.20090100  |
| H  | 6.56543400  | 0.10162300  | -0.28247500 |

|   |            |             |             |
|---|------------|-------------|-------------|
| H | 5.88386100 | -0.21280300 | 2.39409600  |
| N | 3.89051600 | -0.25253100 | 1.55773800  |
| N | 4.41968400 | -0.00541500 | -0.51856000 |
| C | 3.17006800 | -0.42308700 | 2.80287300  |
| C | 2.83366100 | 0.72384700  | 3.54716100  |
| C | 2.90597500 | -1.73244600 | 3.25737000  |
| C | 2.18885600 | 0.52878800  | 4.77556700  |
| C | 2.25911100 | -1.86541100 | 4.49137700  |
| C | 1.90046000 | -0.74891800 | 5.24255000  |
| H | 1.91788500 | 1.39112400  | 5.37613600  |
| H | 2.04191500 | -2.85624700 | 4.87570000  |
| H | 1.40351400 | -0.87737300 | 6.19971400  |
| C | 4.39069100 | 0.10739900  | -1.96306700 |
| C | 4.62255100 | -1.05386100 | -2.72830200 |
| C | 4.20987200 | 1.37913500  | -2.54149500 |
| C | 4.64258000 | -0.91227100 | -4.12113000 |
| C | 4.23771800 | 1.45852600  | -3.93935900 |
| C | 4.44749500 | 0.32754600  | -4.72238000 |
| H | 4.82113800 | -1.78405100 | -4.74241700 |
| H | 4.10453200 | 2.42217700  | -4.42019400 |
| H | 4.46938500 | 0.41433300  | -5.80476800 |
| C | 4.89793100 | -2.41776700 | -2.10138900 |
| C | 6.39105200 | -2.78590700 | -2.22582300 |
| C | 4.01181300 | -3.52519100 | -2.69720700 |
| H | 4.66054900 | -2.35739400 | -1.03496000 |
| H | 7.03495300 | -2.03504200 | -1.75700000 |
| H | 6.59031800 | -3.74922000 | -1.74465900 |
| H | 6.68963200 | -2.86740700 | -3.27624900 |
| H | 2.95190400 | -3.27195700 | -2.61914400 |
| H | 4.24117100 | -3.70709100 | -3.75232700 |
| H | 4.17892300 | -4.46637500 | -2.16259800 |
| C | 4.05121600 | 2.64847000  | -1.71196000 |
| C | 2.84683500 | 3.49406100  | -2.15864000 |
| C | 5.35039900 | 3.48014600  | -1.73828000 |
| H | 3.86614200 | 2.35670700  | -0.67436200 |
| H | 1.92134600 | 2.91208500  | -2.12039200 |
| H | 2.73406200 | 4.35828500  | -1.49724300 |
| H | 2.97088900 | 3.87588400  | -3.17748700 |
| H | 6.20517900 | 2.90413300  | -1.36936000 |
| H | 5.58710100 | 3.81062700  | -2.75527100 |
| H | 5.24691900 | 4.37174100  | -1.11093500 |
| C | 3.35650100 | -2.97117900 | 2.48775400  |
| C | 2.31537200 | -4.10370000 | 2.51053300  |
| C | 4.71079300 | -3.48420600 | 3.02231100  |



|   |              |             |             |
|---|--------------|-------------|-------------|
| H | 3.49543400   | -2.68412100 | 1.44076400  |
| H | 1.33178800   | -3.74703800 | 2.19158500  |
| H | 2.62817100   | -4.90794900 | 1.83677000  |
| H | 2.20814600   | -4.54442000 | 3.50696700  |
| H | 5.49178000   | -2.72194200 | 2.94950800  |
| H | 4.62737800   | -3.77681300 | 4.07439700  |
| H | 5.04177500   | -4.35947500 | 2.45336400  |
| C | 3.18092400   | 2.13717300  | 3.09179100  |
| C | 4.31474200   | 2.72850700  | 3.95434300  |
| C | 1.95162600   | 3.06212600  | 3.08641700  |
| H | 3.54448200   | 2.08530800  | 2.06161100  |
| H | 5.21306800   | 2.10349700  | 3.92328900  |
| H | 4.58536800   | 3.72755600  | 3.59721200  |
| H | 4.00980600   | 2.81837000  | 5.00236000  |
| H | 1.15525600   | 2.65272100  | 2.45841100  |
| H | 1.55079200   | 3.21153000  | 4.09480900  |
| H | 2.22397200   | 4.04629900  | 2.69276900  |
| C | -5.91878000  | 2.51252200  | -0.13759900 |
| C | -4.87493700  | 2.20864700  | -0.92669600 |
| H | -5.70460800  | 2.94907600  | 0.83888000  |
| H | -5.01796000  | 1.75373900  | -1.90453500 |
| C | -7.34725400  | 2.32847200  | -0.42824700 |
| C | -8.27738100  | 2.51497800  | 0.60988100  |
| C | -7.83277500  | 1.97312400  | -1.70110200 |
| C | -9.64311100  | 2.33656200  | 0.39336900  |
| H | -7.92111600  | 2.80160300  | 1.59625400  |
| C | -9.19604600  | 1.79604700  | -1.91800000 |
| H | -7.14231600  | 1.85179900  | -2.53018800 |
| C | -10.10725700 | 1.97414500  | -0.87186900 |
| H | -10.34354300 | 2.48636300  | 1.20958100  |
| H | -9.55270600  | 1.52804800  | -2.90821300 |
| H | -11.17062900 | 1.84101700  | -1.04654400 |
| C | -3.46011100  | 2.50409400  | -0.55042700 |
| H | -3.39477100  | 2.98157500  | 0.43314100  |
| H | -2.98325900  | 3.16387300  | -1.28398600 |
| O | -2.74253700  | 1.24309800  | -0.52943700 |
| H | -2.69392500  | -1.69556700 | -2.48707600 |
| C | -4.55750800  | -1.59897700 | 0.29075600  |
| C | -5.76794800  | -2.25419400 | 0.52855100  |
| C | -5.77162500  | -3.61759900 | 0.83176200  |
| C | -4.55197500  | -4.29577600 | 0.88521800  |
| C | -3.36306900  | -3.60730600 | 0.63971900  |
| H | -6.70236400  | -4.13863800 | 1.02452600  |
| H | -4.45871100  | -0.54233500 | 0.05910800  |

|                                              |             |             |                             |
|----------------------------------------------|-------------|-------------|-----------------------------|
| H                                            | -2.38573900 | -4.07309600 | 0.65279900                  |
| Cl                                           | -4.49643600 | -5.98918800 | 1.25898600                  |
| Cl                                           | -7.25011700 | -1.36269200 | 0.44867600                  |
| N                                            | -3.43286200 | -2.30797100 | 0.35145900                  |
| O                                            | -2.06497500 | -1.30127400 | 0.25353500                  |
| Zero-point correction=                       |             |             | 1.030283 (Hartree/Particle) |
| Thermal correction to Energy=                |             |             | 1.097327                    |
| Thermal correction to Enthalpy=              |             |             | 1.098271                    |
| Thermal correction to Gibbs Free Energy=     |             |             | 0.914928                    |
| Sum of electronic and zero-point Energies=   |             |             | -3690.143347                |
| Sum of electronic and thermal Energies=      |             |             | -3690.076304                |
| Sum of electronic and thermal Enthalpies=    |             |             | -3690.075359                |
| Sum of electronic and thermal Free Energies= |             |             | -3690.258703                |

### 3-INT3

|   |             |             |             |
|---|-------------|-------------|-------------|
| C | 0.75297800  | 1.49781700  | -3.12461100 |
| O | 0.31767300  | 2.72327600  | -3.60339300 |
| C | 2.18897100  | 1.18624900  | -3.41291800 |
| C | 2.58223800  | -0.10979100 | -3.76727700 |
| C | 3.13984200  | 2.21625100  | -3.38233100 |
| C | 3.91473200  | -0.37045700 | -4.08691100 |
| H | 1.83506300  | -0.89487800 | -3.80904800 |
| C | 4.47293500  | 1.94845900  | -3.69321500 |
| C | 4.86192100  | 0.65530100  | -4.04830200 |
| H | 4.21144000  | -1.37350500 | -4.37794300 |
| H | 5.20451100  | 2.75052600  | -3.66713700 |
| C | -0.02444600 | 0.99854000  | -1.96059000 |
| C | -1.16613600 | 1.76091100  | -1.48682700 |
| C | -0.99198700 | 2.84619800  | -0.61686700 |
| C | -0.80823200 | 3.85580500  | 0.04768000  |
| C | -0.58817800 | 5.01983200  | 0.81984400  |
| C | -1.68146400 | 5.78764700  | 1.27909000  |
| C | 0.73015800  | 5.42394500  | 1.12829400  |
| C | -1.45440300 | 6.93399600  | 2.03103700  |
| C | 0.94208600  | 6.57163900  | 1.88301800  |
| H | 1.56561600  | 4.83236200  | 0.76958100  |
| C | -0.14614200 | 7.32628800  | 2.33355200  |
| H | -2.29437100 | 7.52482100  | 2.38181300  |
| H | 1.95452300  | 6.88309500  | 2.11911300  |
| H | 0.02545400  | 8.22350700  | 2.92029300  |
| H | 5.89743800  | 0.44980200  | -4.30283700 |
| H | 2.83103300  | 3.22363600  | -3.11991800 |
| H | -2.69221600 | 5.47608800  | 1.03754300  |

|    |             |             |             |
|----|-------------|-------------|-------------|
| Au | 0.63557500  | -0.20249700 | -0.36927900 |
| C  | 1.18398200  | -1.45999700 | 1.15875900  |
| C  | 1.03419800  | -2.89536000 | 2.90296300  |
| C  | 2.35213700  | -2.65918200 | 2.68055200  |
| H  | 3.23548200  | -3.02940600 | 3.17501900  |
| H  | 0.53400100  | -3.51476200 | 3.62978600  |
| N  | 0.33130800  | -2.15284000 | 1.96327600  |
| N  | 2.42771100  | -1.78103600 | 1.60672700  |
| C  | -1.11404600 | -2.13734800 | 1.86472300  |
| C  | -1.83288600 | -1.23745300 | 2.67684100  |
| C  | -1.73944800 | -3.04117000 | 0.98234100  |
| C  | -3.22946800 | -1.25541900 | 2.57334400  |
| C  | -3.13787900 | -3.00648200 | 0.91574200  |
| C  | -3.87691200 | -2.12564800 | 1.70007200  |
| H  | -3.81579300 | -0.58223600 | 3.19163200  |
| H  | -3.65440900 | -3.68356800 | 0.24296800  |
| H  | -4.96075400 | -2.12211300 | 1.63050000  |
| C  | 3.67861300  | -1.31346600 | 1.04480300  |
| C  | 4.35025600  | -2.14661400 | 0.12713200  |
| C  | 4.19196800  | -0.07376200 | 1.47370900  |
| C  | 5.57692800  | -1.69122500 | -0.37094300 |
| C  | 5.41974000  | 0.33131800  | 0.93579900  |
| C  | 6.10574500  | -0.46595100 | 0.02445700  |
| H  | 6.12626400  | -2.30750700 | -1.07551800 |
| H  | 5.84772300  | 1.28053400  | 1.24284400  |
| H  | 7.05976000  | -0.13416600 | -0.37429900 |
| C  | 3.81315300  | -3.50863500 | -0.30408400 |
| C  | 4.67055000  | -4.65055100 | 0.27877600  |
| C  | 3.70113700  | -3.63215600 | -1.83495100 |
| H  | 2.80199200  | -3.62007000 | 0.09860700  |
| H  | 4.71775700  | -4.60399400 | 1.37156100  |
| H  | 4.25296500  | -5.62328700 | -0.00047900 |
| H  | 5.69755600  | -4.60682900 | -0.09845500 |
| H  | 3.09098900  | -2.82735200 | -2.25430500 |
| H  | 4.68340100  | -3.59685900 | -2.31764600 |
| H  | 3.24043100  | -4.58875900 | -2.10200600 |
| C  | 3.48744800  | 0.80975400  | 2.49860700  |
| C  | 3.14114500  | 2.19186700  | 1.91200300  |
| C  | 4.32085800  | 0.94490000  | 3.78848500  |
| H  | 2.54207900  | 0.33170100  | 2.77072600  |
| H  | 2.52250900  | 2.09137000  | 1.01426400  |
| H  | 2.58930000  | 2.78725300  | 2.64749500  |
| H  | 4.04353700  | 2.75022700  | 1.64139300  |
| H  | 4.53351800  | -0.03303500 | 4.23160200  |

|                        |             |             |                             |
|------------------------|-------------|-------------|-----------------------------|
| H                      | 5.27955600  | 1.43753600  | 3.59698600                  |
| H                      | 3.78159600  | 1.54308500  | 4.53038800                  |
| C                      | -0.96776600 | -4.03976200 | 0.12509900                  |
| C                      | -1.18442200 | -3.78082000 | -1.37850200                 |
| C                      | -1.32691500 | -5.49218400 | 0.49723700                  |
| H                      | 0.09979600  | -3.90948100 | 0.32545400                  |
| H                      | -0.89573800 | -2.76141600 | -1.65306000                 |
| H                      | -0.58450900 | -4.47816800 | -1.97243900                 |
| H                      | -2.23234700 | -3.92119900 | -1.66335700                 |
| H                      | -1.14224800 | -5.69306400 | 1.55735700                  |
| H                      | -2.38077300 | -5.70978700 | 0.29601900                  |
| H                      | -0.72617600 | -6.19343600 | -0.09079100                 |
| C                      | -1.15862900 | -0.27558300 | 3.65134500                  |
| C                      | -1.51868800 | -0.61420600 | 5.11170800                  |
| C                      | -1.49371600 | 1.19258100  | 3.32570400                  |
| H                      | -0.07519300 | -0.38626800 | 3.54891300                  |
| H                      | -1.24584300 | -1.64365800 | 5.36417800                  |
| H                      | -0.99161200 | 0.05443700  | 5.80002100                  |
| H                      | -2.59228000 | -0.50208000 | 5.29513800                  |
| H                      | -1.20456900 | 1.44727400  | 2.30123300                  |
| H                      | -2.56440700 | 1.39468100  | 3.43720400                  |
| H                      | -0.96030600 | 1.86304400  | 4.00765500                  |
| C                      | -5.51401300 | 0.58518800  | -0.77703600                 |
| C                      | -4.73712900 | 1.16985700  | -1.70424400                 |
| H                      | -5.25139500 | 0.73827100  | 0.27039000                  |
| H                      | -4.94391900 | 1.07313200  | -2.76662600                 |
| C                      | -6.70755600 | -0.24005300 | -0.99258200                 |
| C                      | -7.46671300 | -0.63105400 | 0.12518500                  |
| C                      | -7.12800200 | -0.66517500 | -2.26699400                 |
| C                      | -8.61058000 | -1.41436100 | -0.02040000                 |
| H                      | -7.15981200 | -0.30435400 | 1.11604800                  |
| C                      | -8.26859900 | -1.44817400 | -2.41234200                 |
| H                      | -6.55659200 | -0.39068000 | -3.14825800                 |
| C                      | -9.01518600 | -1.82516000 | -1.29099800                 |
| H                      | -9.18557200 | -1.70081300 | 0.85502000                  |
| H                      | -8.57796400 | -1.76878300 | -3.40258300                 |
| H                      | -9.90511100 | -2.43567600 | -1.40973100                 |
| C                      | -3.56917600 | 2.01163500  | -1.33541400                 |
| H                      | -3.46084600 | 2.11746600  | -0.25290200                 |
| H                      | -3.59349400 | 3.00368000  | -1.79871700                 |
| O                      | -2.34828100 | 1.35505400  | -1.85785700                 |
| H                      | 0.67551400  | 2.84568400  | -4.49560600                 |
| O                      | -0.18015800 | 0.42162700  | -3.27118000                 |
| Zero-point correction= |             |             | 0.960253 (Hartree/Particle) |

|                                              |              |
|----------------------------------------------|--------------|
| Thermal correction to Energy=                | 1.019826     |
| Thermal correction to Enthalpy=              | 1.020771     |
| Thermal correction to Gibbs Free Energy=     | 0.854858     |
| Sum of electronic and zero-point Energies=   | -2522.821702 |
| Sum of electronic and thermal Energies=      | -2522.762128 |
| Sum of electronic and thermal Enthalpies=    | -2522.761184 |
| Sum of electronic and thermal Free Energies= | -2522.927097 |

## 2-INT0

|    |             |             |             |
|----|-------------|-------------|-------------|
| C  | -1.76711000 | -0.79742400 | 3.18862200  |
| O  | -0.85413400 | -1.57832400 | 3.43141100  |
| C  | -3.10721100 | -0.90975300 | 3.80067800  |
| C  | -3.32849900 | -1.94663100 | 4.72501600  |
| C  | -4.14380300 | -0.01308400 | 3.49393400  |
| C  | -4.57194500 | -2.08065500 | 5.33187500  |
| H  | -2.51593400 | -2.62827000 | 4.95132600  |
| C  | -5.38811100 | -0.15385400 | 4.10395700  |
| C  | -5.60192200 | -1.18544700 | 5.02207600  |
| H  | -4.74262500 | -2.87960100 | 6.04651700  |
| H  | -6.18908200 | 0.53931200  | 3.86729800  |
| C  | -1.51634700 | 0.32799400  | 2.23065500  |
| C  | -1.06956300 | 1.50650700  | 2.28727500  |
| C  | -0.62339000 | 2.76281400  | 2.30929500  |
| C  | -0.22870600 | 3.92712900  | 2.36668000  |
| C  | 0.23685900  | 5.25244600  | 2.43921500  |
| C  | 1.62681800  | 5.51868900  | 2.40036800  |
| C  | -0.68088500 | 6.32375100  | 2.55589200  |
| C  | 2.07976400  | 6.82925900  | 2.47574800  |
| C  | -0.21213700 | 7.62861000  | 2.63035600  |
| H  | -1.74429200 | 6.11173800  | 2.58737600  |
| C  | 1.16403400  | 7.88154000  | 2.59043900  |
| H  | 3.14468200  | 7.03571300  | 2.44707600  |
| H  | -0.91377900 | 8.45138900  | 2.72117100  |
| H  | 1.52457600  | 8.90396400  | 2.65026000  |
| H  | -6.57189300 | -1.29187800 | 5.49860100  |
| H  | -3.97406700 | 0.78813600  | 2.78173600  |
| H  | 2.32261100  | 4.69122900  | 2.31319400  |
| Au | -1.76683300 | -0.07487900 | 0.14578600  |
| C  | -2.14994600 | -0.62560900 | -1.76979200 |
| C  | -2.58916600 | -0.57812500 | -3.98081700 |
| C  | -2.61912700 | -1.87708000 | -3.58552500 |
| H  | -2.80730000 | -2.78476700 | -4.13533300 |
| H  | -2.73992800 | -0.12343600 | -4.94642400 |

|   |             |             |             |
|---|-------------|-------------|-------------|
| N | -2.29924900 | 0.17898300  | -2.85377400 |
| N | -2.34837900 | -1.88999200 | -2.22415800 |
| C | -2.15244200 | 1.62099100  | -2.86110100 |
| C | -3.27444400 | 2.41428900  | -2.54851500 |
| C | -0.89955200 | 2.16028700  | -3.21481800 |
| C | -3.10339300 | 3.80352100  | -2.58440300 |
| C | -0.79096600 | 3.55658900  | -3.23343900 |
| C | -1.87650200 | 4.36954400  | -2.92070900 |
| H | -3.94543300 | 4.44925500  | -2.35496900 |
| H | 0.15756200  | 4.01004900  | -3.50296900 |
| H | -1.76875800 | 5.44998400  | -2.94780900 |
| C | -2.30305700 | -3.09245500 | -1.41505000 |
| C | -1.06525000 | -3.75012400 | -1.25853200 |
| C | -3.50592700 | -3.56554500 | -0.85399000 |
| C | -1.06289700 | -4.92348500 | -0.49473600 |
| C | -3.43866100 | -4.74400600 | -0.10016000 |
| C | -2.23271600 | -5.41513000 | 0.07885400  |
| H | -0.13242700 | -5.46202000 | -0.35083600 |
| H | -4.34407600 | -5.14265900 | 0.34668900  |
| H | -2.20410700 | -6.32917500 | 0.66459800  |
| C | 0.21796400  | -3.26320900 | -1.92639900 |
| C | 0.49221100  | -4.06656900 | -3.21590900 |
| C | 1.43761700  | -3.30646800 | -0.98863300 |
| H | 0.07550700  | -2.21671400 | -2.21362200 |
| H | -0.33628600 | -3.99215100 | -3.92778200 |
| H | 1.39607100  | -3.69628900 | -3.71024800 |
| H | 0.64185200  | -5.12782800 | -2.99084000 |
| H | 1.26551800  | -2.75468700 | -0.06027800 |
| H | 1.71350500  | -4.33489800 | -0.73082100 |
| H | 2.30072600  | -2.85864000 | -1.49162600 |
| C | -4.85016300 | -2.87105400 | -1.05588500 |
| C | -5.50246900 | -2.47867400 | 0.28326500  |
| C | -5.80259500 | -3.74195100 | -1.90001200 |
| H | -4.67813200 | -1.94502700 | -1.61272700 |
| H | -4.84872300 | -1.82800100 | 0.87200000  |
| H | -6.44197500 | -1.94580500 | 0.10289900  |
| H | -5.73502500 | -3.35802100 | 0.89212400  |
| H | -5.36571800 | -3.98979000 | -2.87258700 |
| H | -6.03650600 | -4.68343300 | -1.39267400 |
| H | -6.74599100 | -3.21517900 | -2.07666100 |
| C | 0.30089600  | 1.30088500  | -3.60021900 |
| C | 1.52347400  | 1.57663600  | -2.70585900 |
| C | 0.64748000  | 1.48446300  | -5.09220000 |
| H | 0.03101000  | 0.25007700  | -3.45750000 |

|   |             |             |             |
|---|-------------|-------------|-------------|
| H | 1.31346600  | 1.38151300  | -1.65047600 |
| H | 2.35758400  | 0.93386900  | -3.00428900 |
| H | 1.86481600  | 2.61322100  | -2.80268100 |
| H | -0.20539800 | 1.25349200  | -5.73915200 |
| H | 0.95526700  | 2.51340100  | -5.30570000 |
| H | 1.47506000  | 0.82529300  | -5.37273900 |
| C | -4.64219200 | 1.82797300  | -2.20969600 |
| C | -5.67895700 | 2.17099300  | -3.29821900 |
| C | -5.13000200 | 2.27711800  | -0.81934000 |
| H | -4.55047600 | 0.73823600  | -2.17913000 |
| H | -5.35807300 | 1.81689500  | -4.28286200 |
| H | -6.64288300 | 1.70565800  | -3.06785800 |
| H | -5.83931500 | 3.25153100  | -3.37071800 |
| H | -4.41139900 | 2.00010500  | -0.04097800 |
| H | -5.27645500 | 3.36107800  | -0.77254900 |
| H | -6.08908500 | 1.80403800  | -0.58417200 |
| C | 4.75767000  | 1.78578500  | -0.69194200 |
| C | 4.06254600  | 1.11031400  | 0.23584600  |
| H | 4.44073700  | 2.80519600  | -0.92028400 |
| H | 4.32282600  | 0.08371100  | 0.49022600  |
| C | 5.91620900  | 1.31758100  | -1.46814300 |
| C | 6.38320000  | 2.10739600  | -2.53367100 |
| C | 6.58956700  | 0.11242800  | -1.19291800 |
| C | 7.47135800  | 1.70656800  | -3.30754500 |
| H | 5.88124400  | 3.04619800  | -2.75613300 |
| C | 7.67687500  | -0.28812900 | -1.96440100 |
| H | 6.27429000  | -0.50999800 | -0.36153800 |
| C | 8.12240300  | 0.50467600  | -3.02661100 |
| H | 7.81251700  | 2.33377200  | -4.12626100 |
| H | 8.18376700  | -1.21873000 | -1.72642200 |
| H | 8.97383500  | 0.19107900  | -3.62349600 |
| C | 2.90631200  | 1.69353700  | 0.99936200  |
| H | 2.72435100  | 2.72173100  | 0.66472900  |
| H | 3.15921500  | 1.73933000  | 2.07382300  |
| O | 1.68467100  | 0.98254900  | 0.81689200  |
| H | 1.77616600  | 0.10203200  | 1.23730100  |
| C | 5.10357500  | -2.04846100 | 2.66819700  |
| C | 3.86215800  | -2.44532800 | 2.34767300  |
| H | 5.21172900  | -1.33021000 | 3.48204700  |
| H | 3.68771000  | -3.14856600 | 1.53556700  |
| C | 6.37045900  | -2.47091900 | 2.05148400  |
| C | 7.56460900  | -1.85683100 | 2.46964000  |
| C | 6.45042600  | -3.46626200 | 1.05854100  |
| C | 8.79301000  | -2.21459500 | 1.91609300  |

|                                              |            |             |                             |
|----------------------------------------------|------------|-------------|-----------------------------|
| H                                            | 7.52400900 | -1.08907300 | 3.23825400                  |
| C                                            | 7.67642000 | -3.82415100 | 0.50485900                  |
| H                                            | 5.54980800 | -3.97214100 | 0.72436800                  |
| C                                            | 8.85417100 | -3.20033300 | 0.93021400                  |
| H                                            | 9.70107200 | -1.72563000 | 2.25609400                  |
| H                                            | 7.71679200 | -4.59878200 | -0.25557700                 |
| H                                            | 9.80972500 | -3.48724500 | 0.50147400                  |
| C                                            | 2.63539700 | -2.00394200 | 3.08221200                  |
| H                                            | 2.89551800 | -1.25199300 | 3.84179700                  |
| H                                            | 2.19063900 | -2.86178100 | 3.60936400                  |
| O                                            | 1.67172400 | -1.48418000 | 2.15357000                  |
| H                                            | 0.79395500 | -1.51782600 | 2.57944000                  |
| Zero-point correction=                       |            |             | 1.122779 (Hartree/Particle) |
| Thermal correction to Energy=                |            |             | 1.193971                    |
| Thermal correction to Enthalpy=              |            |             | 1.194916                    |
| Thermal correction to Gibbs Free Energy=     |            |             | 0.997032                    |
| Sum of electronic and zero-point Energies=   |            |             | -2871.649139                |
| Sum of electronic and thermal Energies=      |            |             | -2871.577947                |
| Sum of electronic and thermal Enthalpies=    |            |             | -2871.577003                |
| Sum of electronic and thermal Free Energies= |            |             | -2871.774886                |

## 2-TS2

|   |             |             |             |
|---|-------------|-------------|-------------|
| C | -0.57449000 | -1.01491800 | -2.04588300 |
| O | -1.87404200 | -1.27016000 | -2.21408400 |
| C | 0.21559900  | -1.68761900 | -3.10694900 |
| C | -0.25587200 | -2.88304700 | -3.67816900 |
| C | 1.36578100  | -1.08627500 | -3.64574200 |
| C | 0.41780900  | -3.47176800 | -4.74554800 |
| H | -1.15402800 | -3.33969700 | -3.27851200 |
| C | 2.02848500  | -1.66896200 | -4.72442400 |
| C | 1.55884000  | -2.86365500 | -5.27577400 |
| H | 0.04821700  | -4.39994100 | -5.17127600 |
| H | 2.90339200  | -1.18236500 | -5.14503000 |
| C | -0.01417900 | -0.24990900 | -1.02209100 |
| C | -0.77914700 | 0.87415800  | -0.41344100 |
| C | -0.60048600 | 1.12958200  | 1.01793900  |
| C | -0.64247800 | 1.36347000  | 2.20997700  |
| C | -0.71858400 | 1.60876300  | 3.61641500  |
| C | -1.08892100 | 0.57208200  | 4.49585100  |
| C | -0.45360300 | 2.88923700  | 4.13991000  |
| C | -1.18411800 | 0.81503700  | 5.86391500  |
| C | -0.54938500 | 3.12176400  | 5.50956600  |
| H | -0.17473500 | 3.69366900  | 3.46667100  |



|    |             |             |             |
|----|-------------|-------------|-------------|
| C  | -0.91359600 | 2.08704000  | 6.37464100  |
| H  | -1.47138200 | 0.00996500  | 6.53342600  |
| H  | -0.34259900 | 4.11242900  | 5.90297900  |
| H  | -0.98888300 | 2.27205700  | 7.44179300  |
| H  | 2.07451800  | -3.31474000 | -6.11858400 |
| H  | 1.70855600  | -0.14454700 | -3.23243400 |
| H  | -1.29995200 | -0.41340800 | 4.09465200  |
| Au | 1.91132500  | -0.62477500 | -0.34032700 |
| C  | 3.80458400  | -1.05190000 | 0.34429200  |
| C  | 5.98801500  | -0.85781600 | 0.94700900  |
| C  | 5.62257900  | -2.14659100 | 1.15414600  |
| H  | 6.17526700  | -2.99050900 | 1.53336700  |
| H  | 6.92369800  | -0.34816600 | 1.10993500  |
| N  | 4.86768600  | -0.20018500 | 0.45064000  |
| N  | 4.28890200  | -2.25185100 | 0.77796300  |
| C  | 4.85227400  | 1.21564400  | 0.15148800  |
| C  | 5.12460100  | 1.63821100  | -1.16652000 |
| C  | 4.61361000  | 2.11685800  | 1.20733000  |
| C  | 5.12925700  | 3.01696500  | -1.41047200 |
| C  | 4.62957100  | 3.48530100  | 0.90388400  |
| C  | 4.88198100  | 3.93212600  | -0.38981700 |
| H  | 5.33944200  | 3.38042600  | -2.41070200 |
| H  | 4.45862100  | 4.20729400  | 1.69680900  |
| H  | 4.90172700  | 4.99743600  | -0.60185900 |
| C  | 3.53824700  | -3.48703200 | 0.87733500  |
| C  | 2.77247300  | -3.71760600 | 2.03696500  |
| C  | 3.64805600  | -4.42818600 | -0.16664000 |
| C  | 2.08041200  | -4.93247000 | 2.11898600  |
| C  | 2.94024200  | -5.62775100 | -0.02527500 |
| C  | 2.16068600  | -5.87734600 | 1.10088400  |
| H  | 1.47679400  | -5.14211100 | 2.99671700  |
| H  | 3.00120700  | -6.37708500 | -0.80753600 |
| H  | 1.61958700  | -6.81506800 | 1.18752200  |
| C  | 2.69003200  | -2.72427700 | 3.19147600  |
| C  | 3.27793700  | -3.32087500 | 4.48567800  |
| C  | 1.24876100  | -2.22770600 | 3.41018400  |
| H  | 3.29341100  | -1.84936900 | 2.93373500  |
| H  | 4.31413100  | -3.64396000 | 4.34366400  |
| H  | 3.26114200  | -2.57729700 | 5.28944800  |
| H  | 2.70347300  | -4.18893900 | 4.82504600  |
| H  | 0.85629700  | -1.75319900 | 2.50544500  |
| H  | 0.57916800  | -3.05065800 | 3.68301000  |
| H  | 1.22136900  | -1.49290100 | 4.22165600  |
| C  | 4.53001000  | -4.20068700 | -1.39095900 |

|   |              |             |             |
|---|--------------|-------------|-------------|
| C | 3.81622700   | -4.55091900 | -2.70799500 |
| C | 5.85283600   | -4.98570400 | -1.26579100 |
| H | 4.77868600   | -3.13557000 | -1.43414000 |
| H | 2.86579700   | -4.02111600 | -2.80405000 |
| H | 4.44779100   | -4.27345900 | -3.55817400 |
| H | 3.61816100   | -5.62457500 | -2.79113200 |
| H | 6.41143700   | -4.70529300 | -0.36717200 |
| H | 5.66454100   | -6.06337700 | -1.21536300 |
| H | 6.49395400   | -4.79677300 | -2.13319400 |
| C | 4.36847600   | 1.66721300  | 2.64437700  |
| C | 2.99156700   | 2.12722400  | 3.15390800  |
| C | 5.49846500   | 2.14262100  | 3.57915900  |
| H | 4.36668000   | 0.57422800  | 2.66607200  |
| H | 2.19066100   | 1.74348200  | 2.51538100  |
| H | 2.81702700   | 1.76036600  | 4.17028200  |
| H | 2.91818400   | 3.22016900  | 3.18478900  |
| H | 6.47604600   | 1.78238500  | 3.24338400  |
| H | 5.54724600   | 3.23553800  | 3.62726100  |
| H | 5.33196200   | 1.77214700  | 4.59581400  |
| C | 5.46787400   | 0.65584900  | -2.28263900 |
| C | 6.99852300   | 0.51371800  | -2.42489100 |
| C | 4.83563100   | 1.03113200  | -3.63383600 |
| H | 5.06591900   | -0.32239200 | -2.00297100 |
| H | 7.46287000   | 0.17566300  | -1.49359000 |
| H | 7.24469300   | -0.21276100 | -3.20630100 |
| H | 7.45555700   | 1.47097500  | -2.69781400 |
| H | 3.75566500   | 1.18117000  | -3.54492900 |
| H | 5.27094800   | 1.94314500  | -4.05537400 |
| H | 5.01198200   | 0.22988800  | -4.35854400 |
| C | -5.56731000  | 1.36140700  | -0.17617600 |
| C | -4.38577000  | 1.72758800  | -0.70524500 |
| H | -5.56271100  | 0.93071600  | 0.82659100  |
| H | -4.33209800  | 2.13421900  | -1.71358500 |
| C | -6.89531600  | 1.45999100  | -0.79922000 |
| C | -7.95719500  | 0.72493700  | -0.24336700 |
| C | -7.15080200  | 2.25005400  | -1.93525300 |
| C | -9.22844900  | 0.75878800  | -0.81419600 |
| H | -7.77933300  | 0.10957700  | 0.63424500  |
| C | -8.42111000  | 2.28722500  | -2.50259900 |
| H | -6.35659000  | 2.85233400  | -2.36633200 |
| C | -9.46412700  | 1.53970800  | -1.94654400 |
| H | -10.02966700 | 0.17290400  | -0.37436300 |
| H | -8.60266900  | 2.90618800  | -3.37631700 |
| H | -10.45451700 | 1.57363300  | -2.39049100 |

|                                            |              |             |                             |
|--------------------------------------------|--------------|-------------|-----------------------------|
| C                                          | -3.09124100  | 1.64310000  | 0.04369500                  |
| H                                          | -3.21192100  | 1.07228000  | 0.96879500                  |
| H                                          | -2.73454400  | 2.64657800  | 0.31562900                  |
| O                                          | -2.12612800  | 1.00149000  | -0.82002900                 |
| H                                          | -4.42526900  | -0.74528900 | -0.51155000                 |
| C                                          | -6.80082200  | -3.05810500 | -0.10083500                 |
| C                                          | -5.57064500  | -2.86482000 | 0.40175300                  |
| H                                          | -6.90023000  | -3.11226500 | -1.18584600                 |
| H                                          | -5.40879600  | -2.77908500 | 1.47492100                  |
| C                                          | -8.06457500  | -3.19676900 | 0.63748500                  |
| C                                          | -9.27012300  | -3.22447100 | -0.08639900                 |
| C                                          | -8.13020800  | -3.29893200 | 2.04015700                  |
| C                                          | -10.49858600 | -3.33762800 | 0.56351500                  |
| H                                          | -9.23817100  | -3.15492600 | -1.17076900                 |
| C                                          | -9.35617600  | -3.41121000 | 2.68945700                  |
| H                                          | -7.21611300  | -3.30456100 | 2.62617600                  |
| C                                          | -10.54623400 | -3.42946000 | 1.95524800                  |
| H                                          | -11.41646900 | -3.36019900 | -0.01664800                 |
| H                                          | -9.38569600  | -3.49283700 | 3.77214500                  |
| H                                          | -11.50041200 | -3.52245200 | 2.46509500                  |
| C                                          | -4.34906800  | -2.71346200 | -0.45176800                 |
| H                                          | -4.58722300  | -2.89863600 | -1.50788400                 |
| H                                          | -3.56458500  | -3.41788400 | -0.15594800                 |
| O                                          | -3.75307600  | -1.40845900 | -0.28692700                 |
| H                                          | -2.42718000  | -1.03472600 | -1.43038400                 |
| C                                          | 0.52413200   | 4.09834300  | -0.18719400                 |
| C                                          | 0.41900900   | 5.48954900  | -0.16123200                 |
| C                                          | -0.51068700  | 6.13493800  | -0.97949900                 |
| C                                          | -1.32404200  | 5.36061000  | -1.81129700                 |
| C                                          | -1.19152200  | 3.97260900  | -1.80980100                 |
| H                                          | -0.59545400  | 7.21550600  | -0.97468500                 |
| H                                          | 1.23092500   | 3.52573900  | 0.40149700                  |
| H                                          | -1.77251400  | 3.29637600  | -2.42530500                 |
| Cl                                         | -2.49237100  | 6.10854500  | -2.85068000                 |
| Cl                                         | 1.45392300   | 6.40688200  | 0.88747600                  |
| N                                          | -0.29364900  | 3.42064500  | -0.99321700                 |
| O                                          | 0.02862700   | 1.84320300  | -1.23038200                 |
| Zero-point correction=                     |              |             | 1.198199 (Hartree/Particle) |
| Thermal correction to Energy=              |              |             | 1.276317                    |
| Thermal correction to Enthalpy=            |              |             | 1.277261                    |
| Thermal correction to Gibbs Free Energy=   |              |             | 1.065690                    |
| Sum of electronic and zero-point Energies= |              |             | -4114.168834                |
| Sum of electronic and thermal Energies=    |              |             | -4114.090716                |
| Sum of electronic and thermal Enthalpies=  |              |             | -4114.089771                |

Sum of electronic and thermal Free Energies= -4114.301342
